# Supplementary material
Source: PubMed Central journal article supplement (PMC6737235)

### Supplementary Data 3

#### Supplementary Data: Identified *Burkholderia gladioli* MDU2 (AUSMDU00013929) glycopeptides

| Gene         | Protein name                                                                      | Uniprot accession | m/z        | Charge | MH+     | Peptide mass | Glycan mass                | Peptide sequence           | MASCOT ion Score | Page      |
|--------------|-----------------------------------------------------------------------------------|-------------------|------------|--------|---------|--------------|----------------------------|----------------------------|------------------|-----------|
| bgla_1g02560 | Uncharacterized protein                                                           | F2LHM5            | 858.37482  | 2      | 1715.74 | 1047.51      | 668.24                     | AAAASAAGTNDK               | 83               | 3 and 4   |
| bgla_1g31160 | Bifunctional uroporphyrinogen-III synthetase/uroporphyrin-III C-methyltransferase | F2LG73            | 763.3587   | 3      | 2288.06 | 1719.84      | 568.22                     | AAHPGDIASEAAATGQPR         | 84               | 5 and 6   |
| bgla_1g32320 | Uncharacterized protein                                                           | F2LGU6            | 945.94171  | 2      | 1890.88 | 1222.64      | 668.23                     | APAAAPEAASAPAK             | 74               | 7 and 8   |
| bgla_1g32320 | Uncharacterized protein                                                           | F2LGU6            | 1359.09094 | 2      | 2717.17 | 1380.71      | 1336.46214<br>(2*668.2311) | ASAPAAPEAASAPAK            | 70               | 9 and 10  |
| bgla_1g28150 | Uncharacterized protein                                                           | F2LBQ5            | 877.35632  | 2      | 1753.70 | 1185.48      | 568.22                     | ASGAM(+16)SNDAMSK          | 64               | 11 and 12 |
| bgla_1g28150 | Uncharacterized protein                                                           | F2LBQ5            | 869.37994  | 2      | 1737.75 | 1169.49      | 568.26                     | ASGAMSNDAMSK               | 56               | 13 and 14 |
| bgla_1g28150 | Uncharacterized protein                                                           | F2LBQ5            | 919.38995  | 2      | 1837.77 | 1169.49      | 668.28                     | ASGAMSNDAMSK               | 72               | 15 and 16 |
| bgla_1g35490 | Periplasmic protease                                                              | F2LE35            | 1119.00671 | 2      | 2237.01 | 1000.51      | 1236.49968<br>(2*568.2445) | ASSAKPASAPN                | 51               | 17 and 18 |
| bgla_1g09280 | Putative lipoprotein                                                              | F2LAW2            | 980.5174   | 2      | 1960.03 | 1391.76      | 568.26                     | AVPAAPASGAAPAAAK           | 76               | 19 and 20 |
| bgla_1g09460 | Uncharacterized protein                                                           | F2LC05            | 820.04755  | 3      | 2458.13 | 1789.83      | 668.29                     | FNEHPQMQFAASAPSK           | 80               | 21 and 22 |
| lolA         | Outer-membrane lipoprotein carrier protein                                        | F2L9H3            | 798.88324  | 4      | 3192.51 | 2624.29      | 568.22                     | GASGAMPTVKPTDNSSGTFVFSRPGR | 27               | 23 and 24 |
| bgla_1g28150 | Uncharacterized protein                                                           | F2LBQ5            | 1095.94482 | 2      | 2190.88 | 1622.66      | 568.23                     | HDAMGM(+16)SPAASDAMSK      | 84               | 25 and 26 |
| bgla_1g28150 | Uncharacterized protein                                                           | F2LBQ5            | 1087.97119 | 2      | 2174.93 | 1606.67      | 568.27                     | HDAMGMSPAASDAMSK           | 118              | 27 and 28 |
| bgla_1g23600 | Ankyrin repeat protein                                                            | F2LDR2            | 704.34857  | 3      | 2111.03 | 1542.76      | 568.27                     | IGDGRPASGAGGQNSAK          | 57               | 29 and 30 |
| bgla_1g23600 | Ankyrin repeat protein                                                            | F2LDR2            | 737.68756  | 3      | 2211.05 | 1542.76      | 668.28                     | IGDGRPASGAGGQNSAK          | 33               | 31 and 32 |

|              |                         |        |            |   |         |         |                            |                             |     |           |
|--------------|-------------------------|--------|------------|---|---------|---------|----------------------------|-----------------------------|-----|-----------|
| bgla_1g28150 | Uncharacterized protein | F2LBQ5 | 779.01428  | 3 | 2335.03 | 1766.74 | 568.29                     | KHDAM(+16)GM(+16)SPAASDAMSK | 52  | 33 and 34 |
| bgla_1g28150 | Uncharacterized protein | F2LBQ5 | 768.34943  | 3 | 2303.03 | 1734.76 | 568.27                     | KHDAMGMSPAASDAMSK           | 103 | 35 and 36 |
| bgla_1g28150 | Uncharacterized protein | F2LBQ5 | 801.68872  | 3 | 2403.05 | 1734.76 | 668.29                     | KHDAMGMSPAASDAMSK           | 20  | 37 and 38 |
| bgla_1g28150 | Uncharacterized protein | F2LBQ5 | 807.02075  | 3 | 2419.05 | 1750.75 | 668.30                     | KHDAMGM(+16)SPAASDAMSK      | 73  | 39 and 40 |
| bgla_1g22150 | Uncharacterized protein | F2LA58 | 1038.50659 | 2 | 2076.01 | 1407.72 | 668.28                     | KPAAPAADAASAPAAQ            | 89  | 41 and 42 |
| bgla_1g35490 | Periplasmic protease    | F2LE35 | 939.46844  | 2 | 1877.93 | 1309.71 | 568.22                     | PLTAGAAAPSASAPK             | 42  | 43 and 44 |
| bgla_1g35490 | Periplasmic protease    | F2LE35 | 989.48029  | 2 | 1977.95 | 1309.71 | 668.24                     | PLTAGAAAPSASAPK             | 80  | 45 and 46 |
| bgla_1g09580 | Uncharacterized protein | F2LC16 | 922.13824  | 3 | 2764.40 | 2096.10 | 668.30                     | SLSNQAPAASAVAAAPIDADKK      | 116 | 47 and 48 |
| bgla_1g22150 | Uncharacterized protein | F2LA58 | 986.46613  | 3 | 2957.38 | 1720.87 | 1236.51001<br>(2*568.2550) | TPASAAAAASTPGAHAAR          | 76  | 49 and 50 |

**Supplementary Data 3. Identified *Burkholderia gladioli* MDU2 (AUSMDU00013929) Glycopeptides.** A total of 24 unique glycopeptides were observed within whole cell proteome samples of *B. gladioli* MDU2. For assigned glycopeptides the gene, protein name, uniprot accession (mapped to *B. gladioli* BSR3), observed m/z, charge state, MH+ mass, peptide mass, glycan, peptide sequence, MASCOT ion score and containing annotated CID and HCD data are provided.

# ITMS-CID

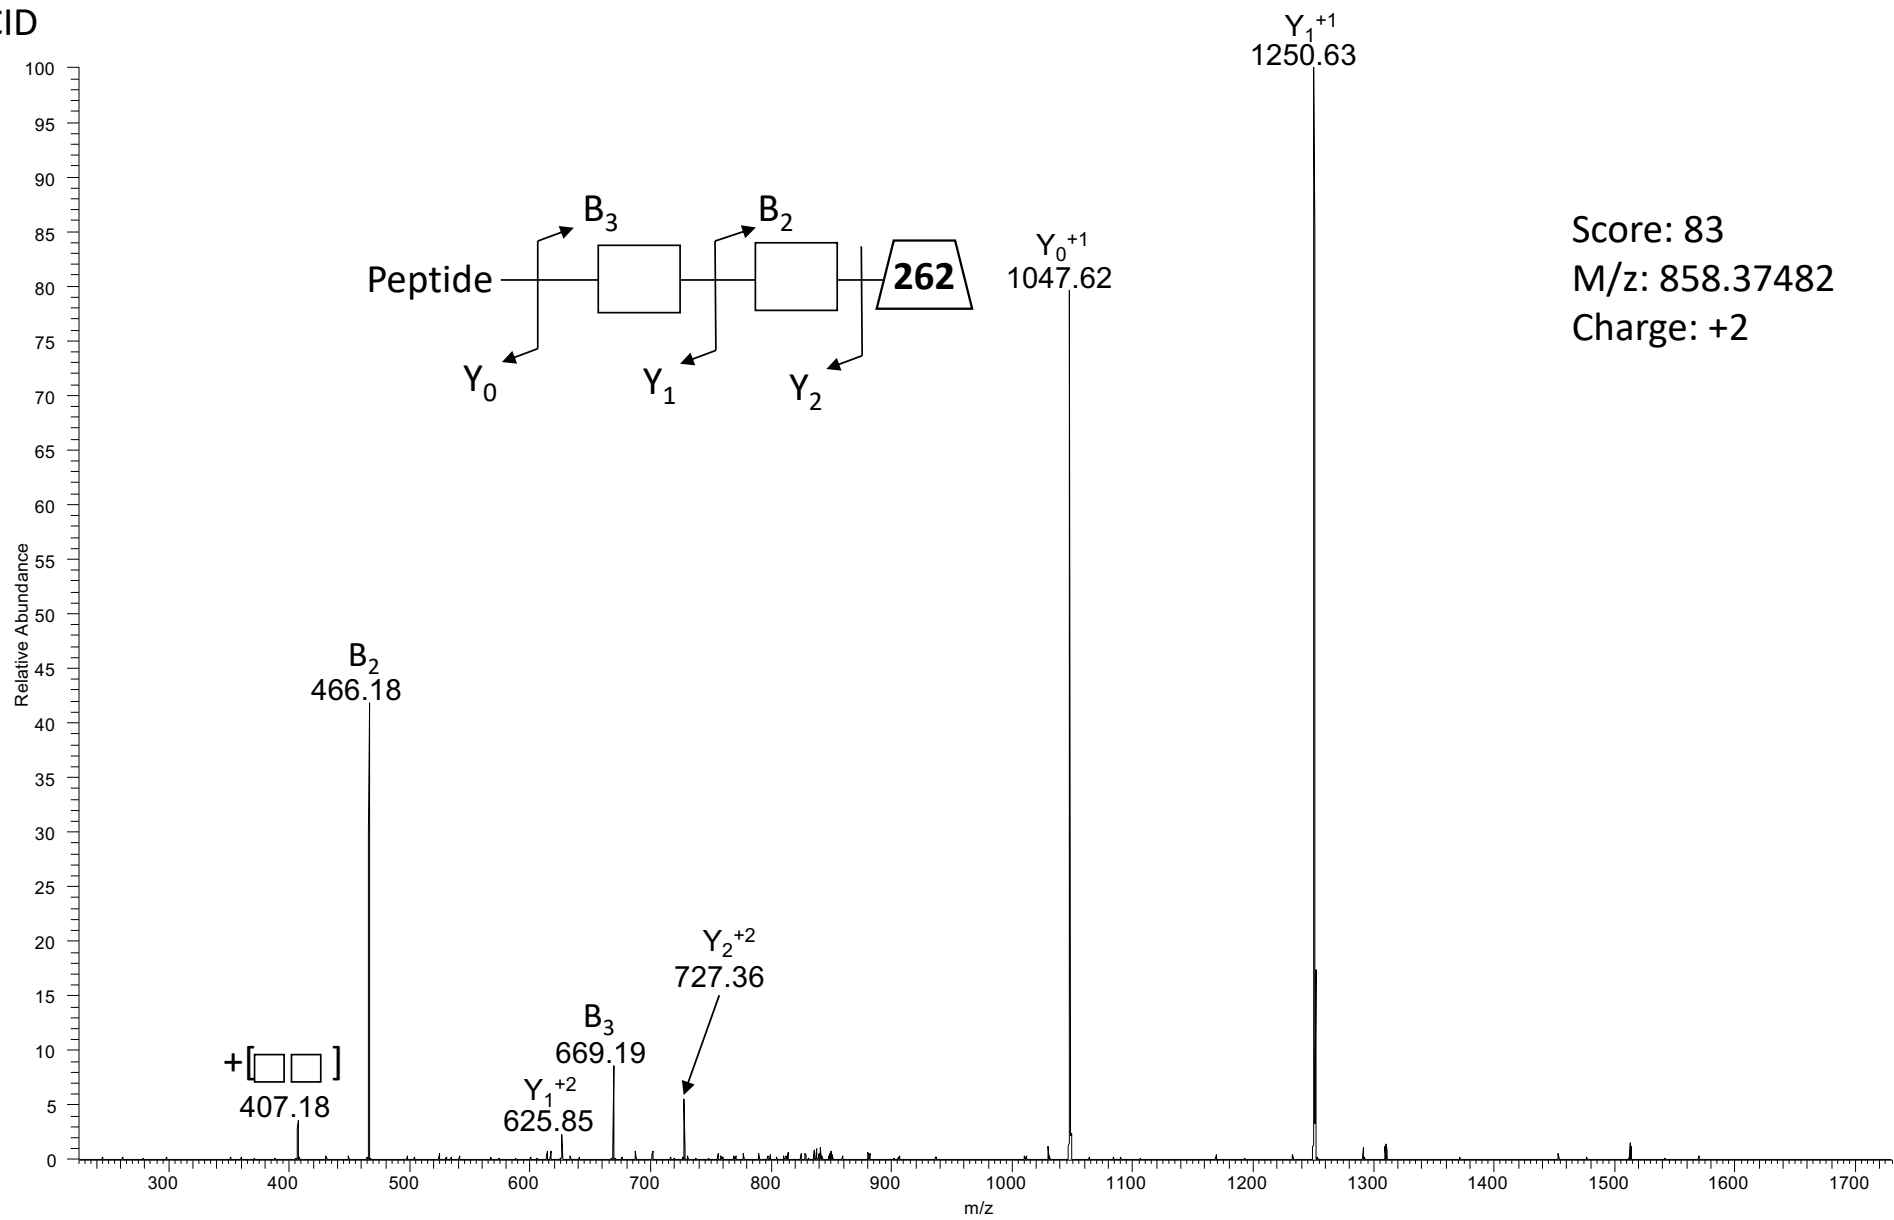

Score: 83  
M/z: 858.37482  
Charge: +2

FTMS-HCD

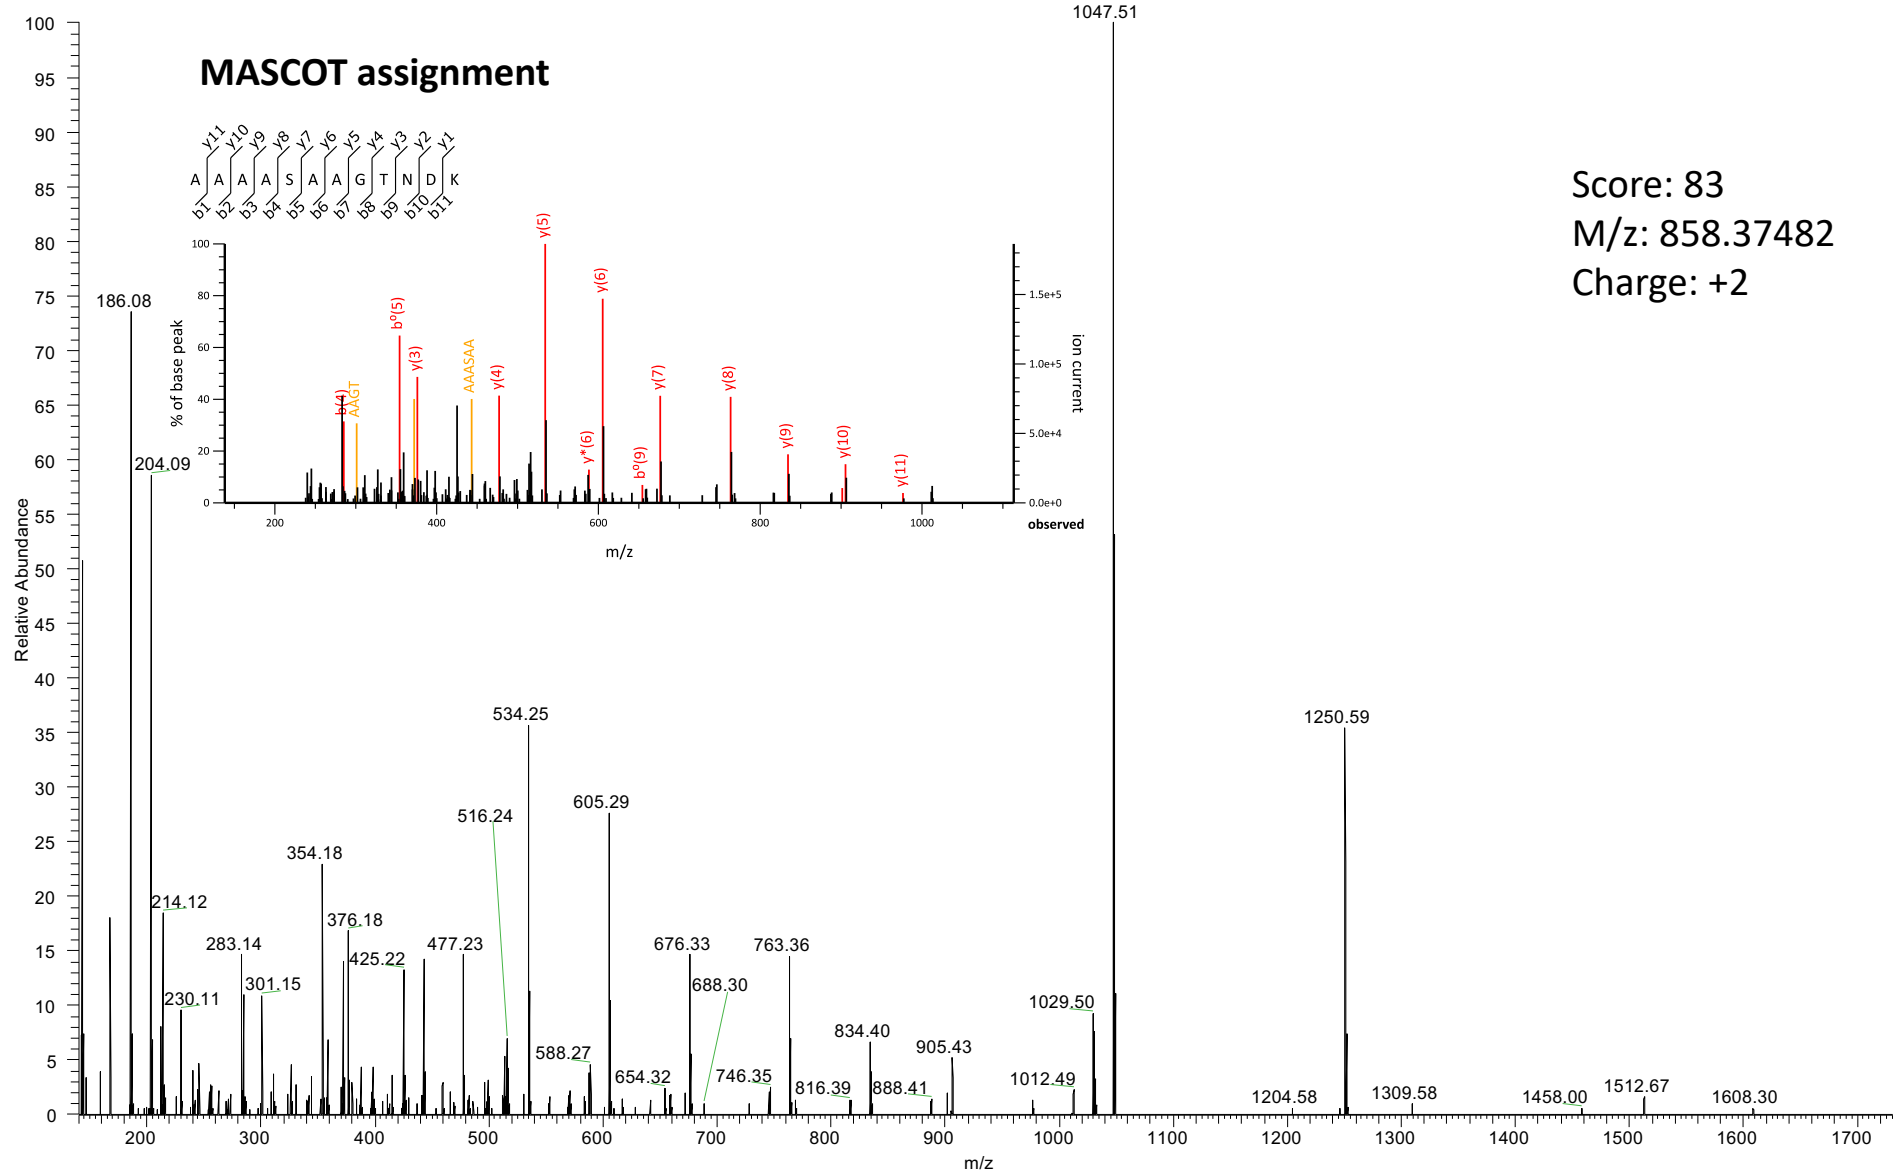

Score: 83  
M/z: 858.37482  
Charge: +2

ITMS-CID

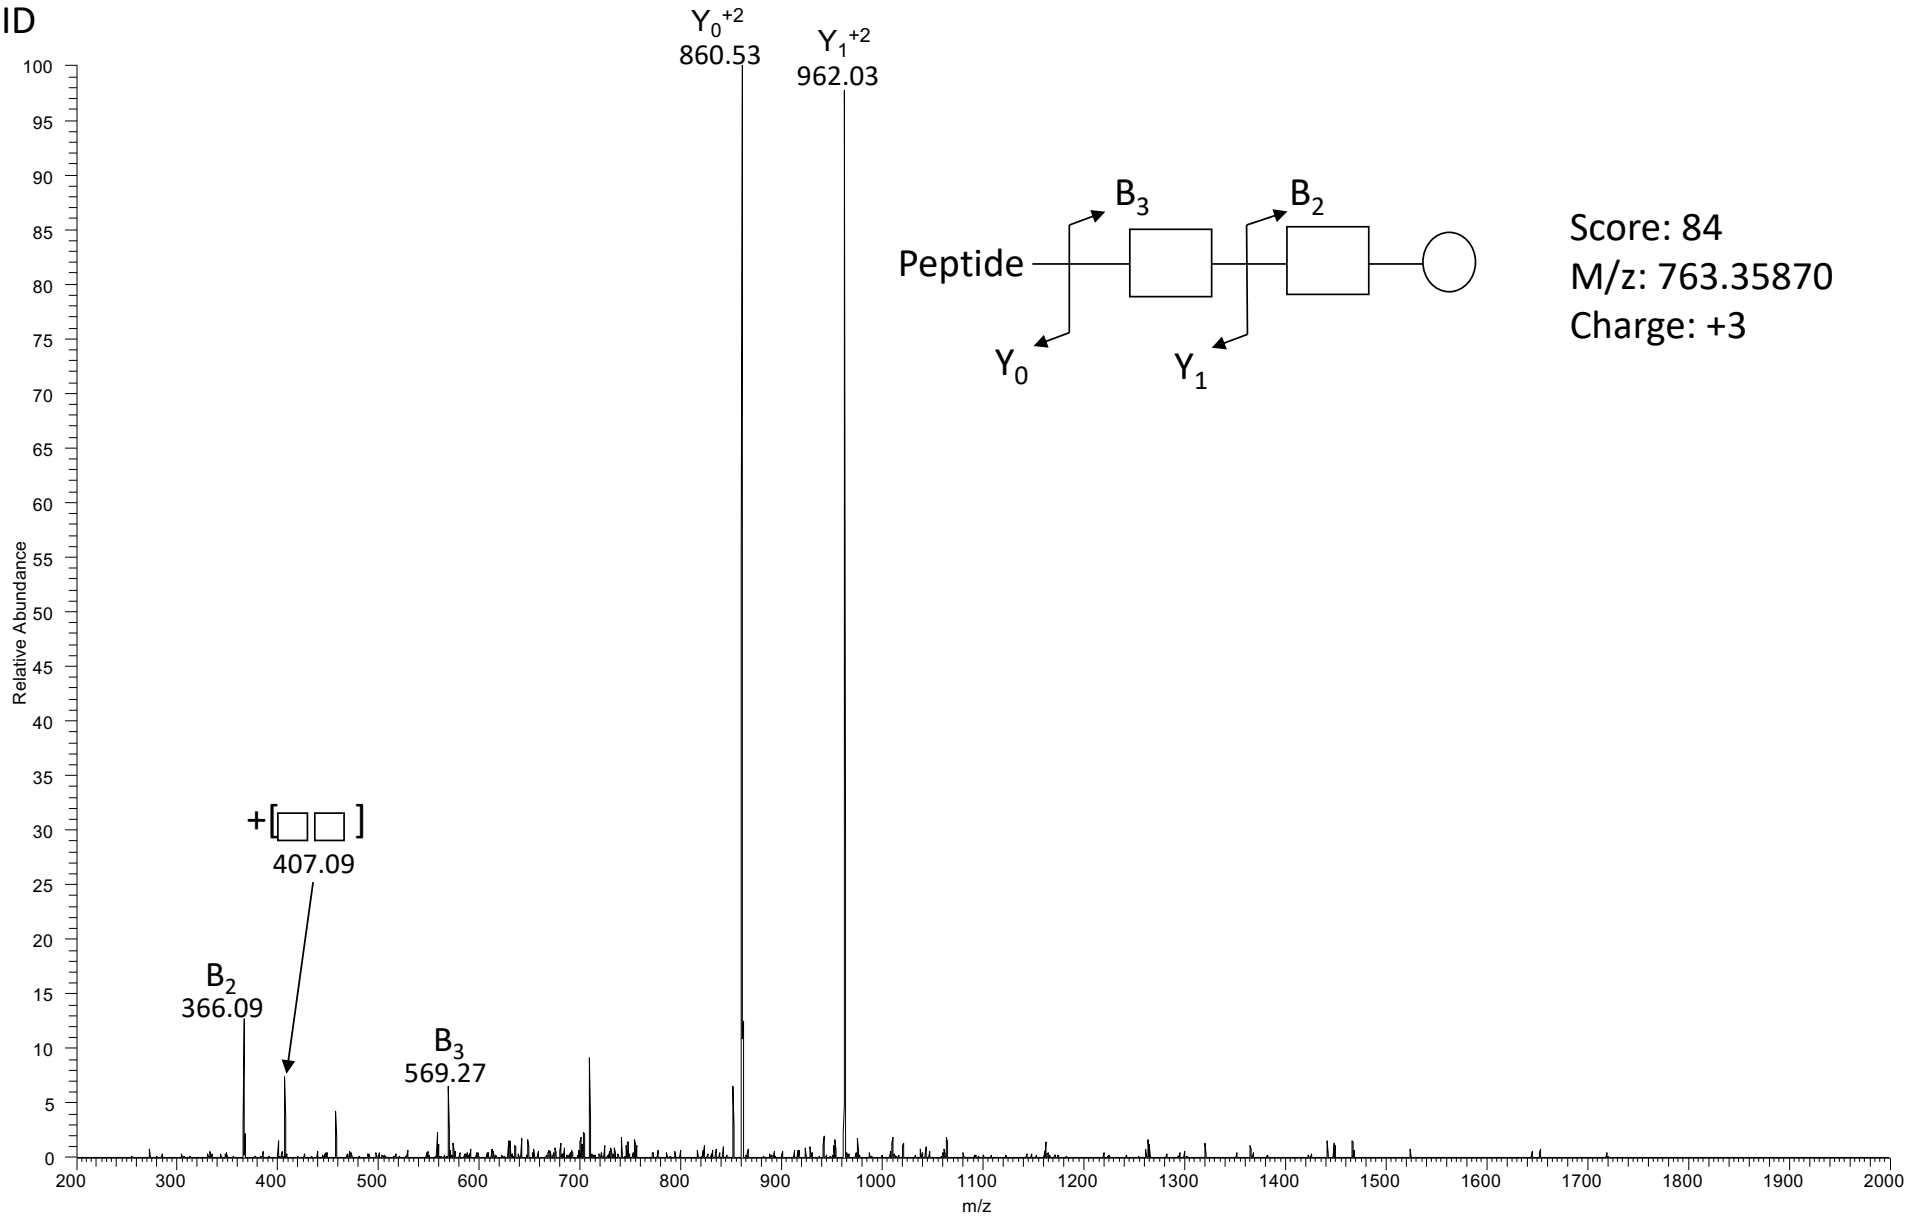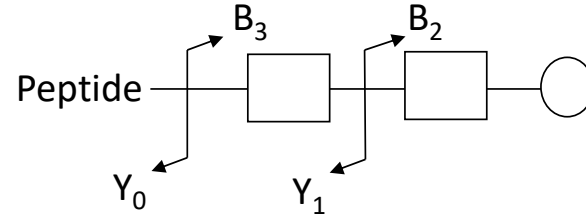

Score: 84  
M/z: 763.35870  
Charge: +3

FTMS-HCD

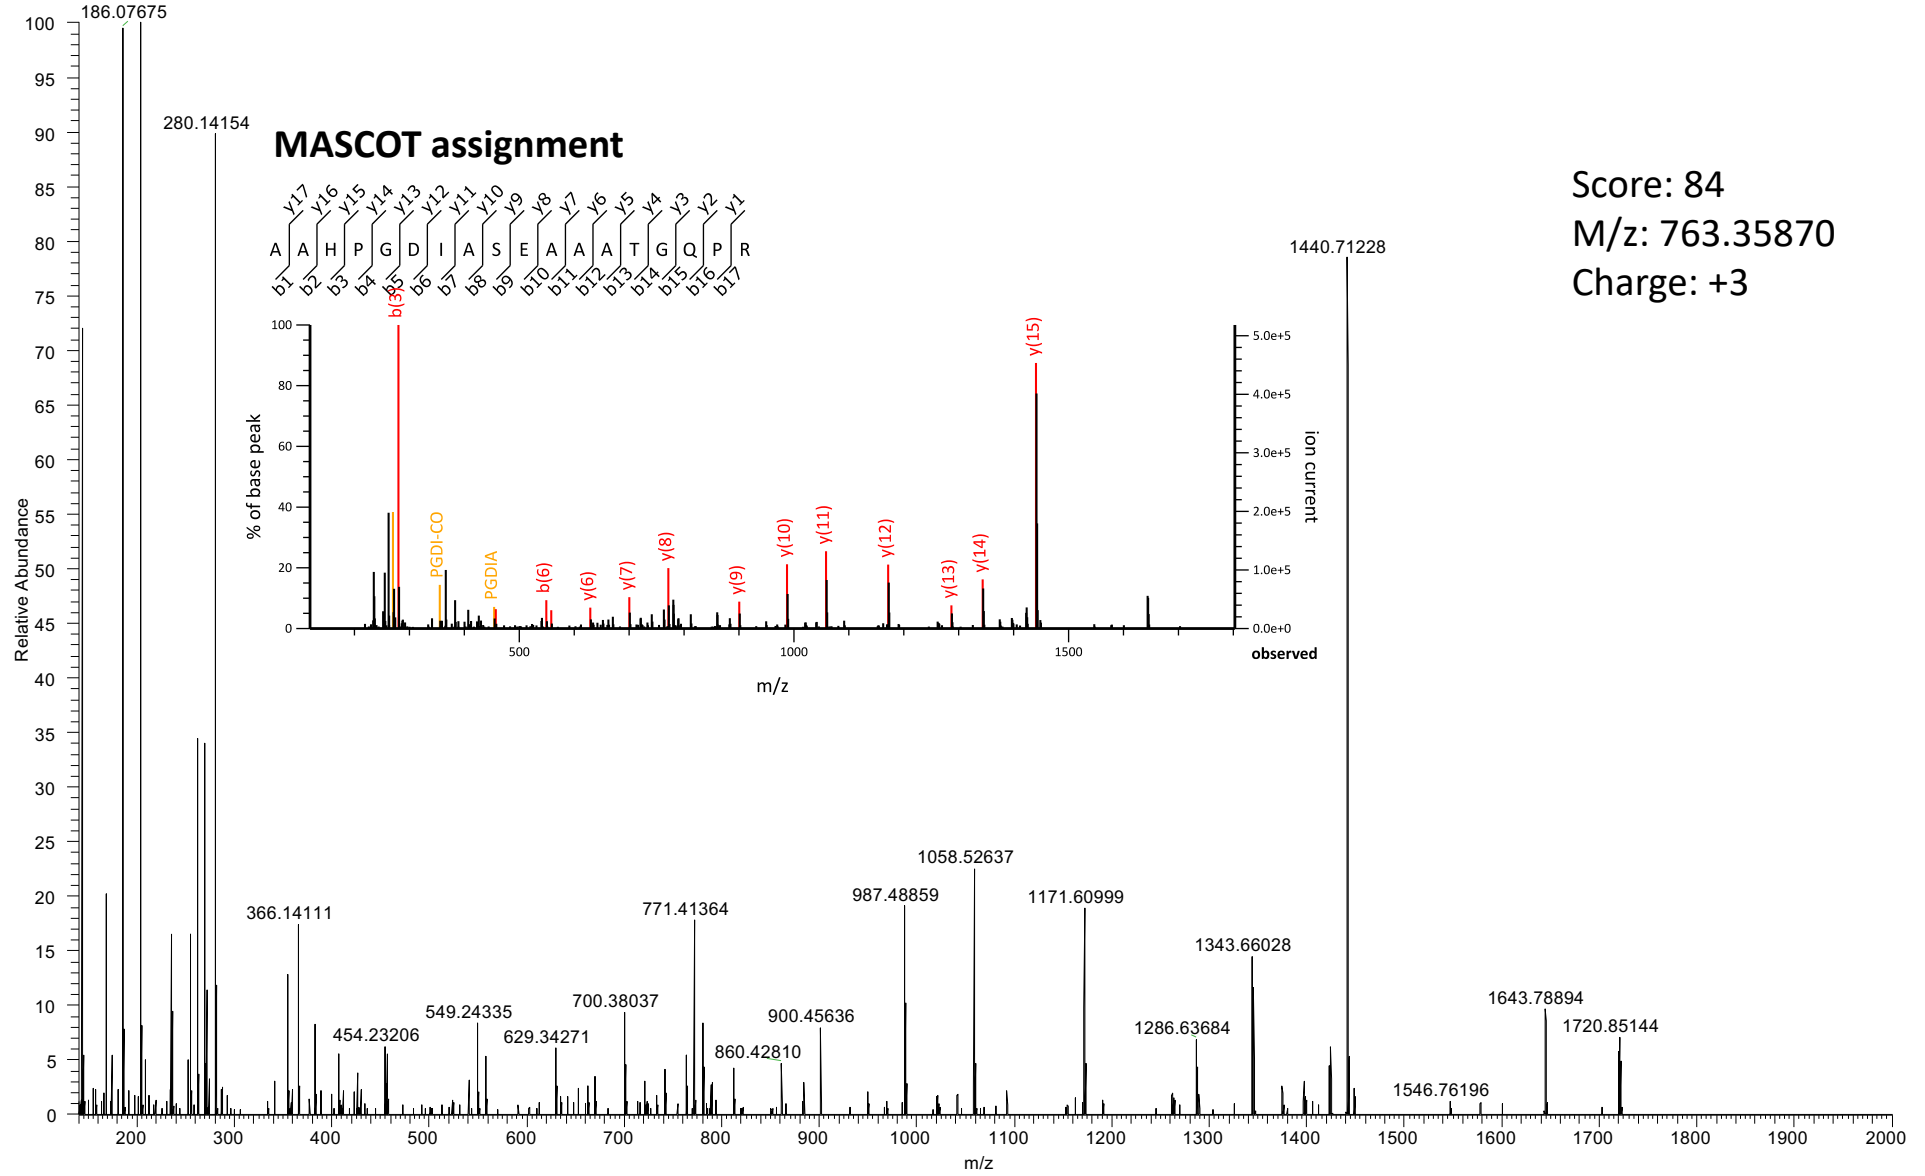

Score: 84

M/z: 763.35870

Charge: +3

# ITMS-CID

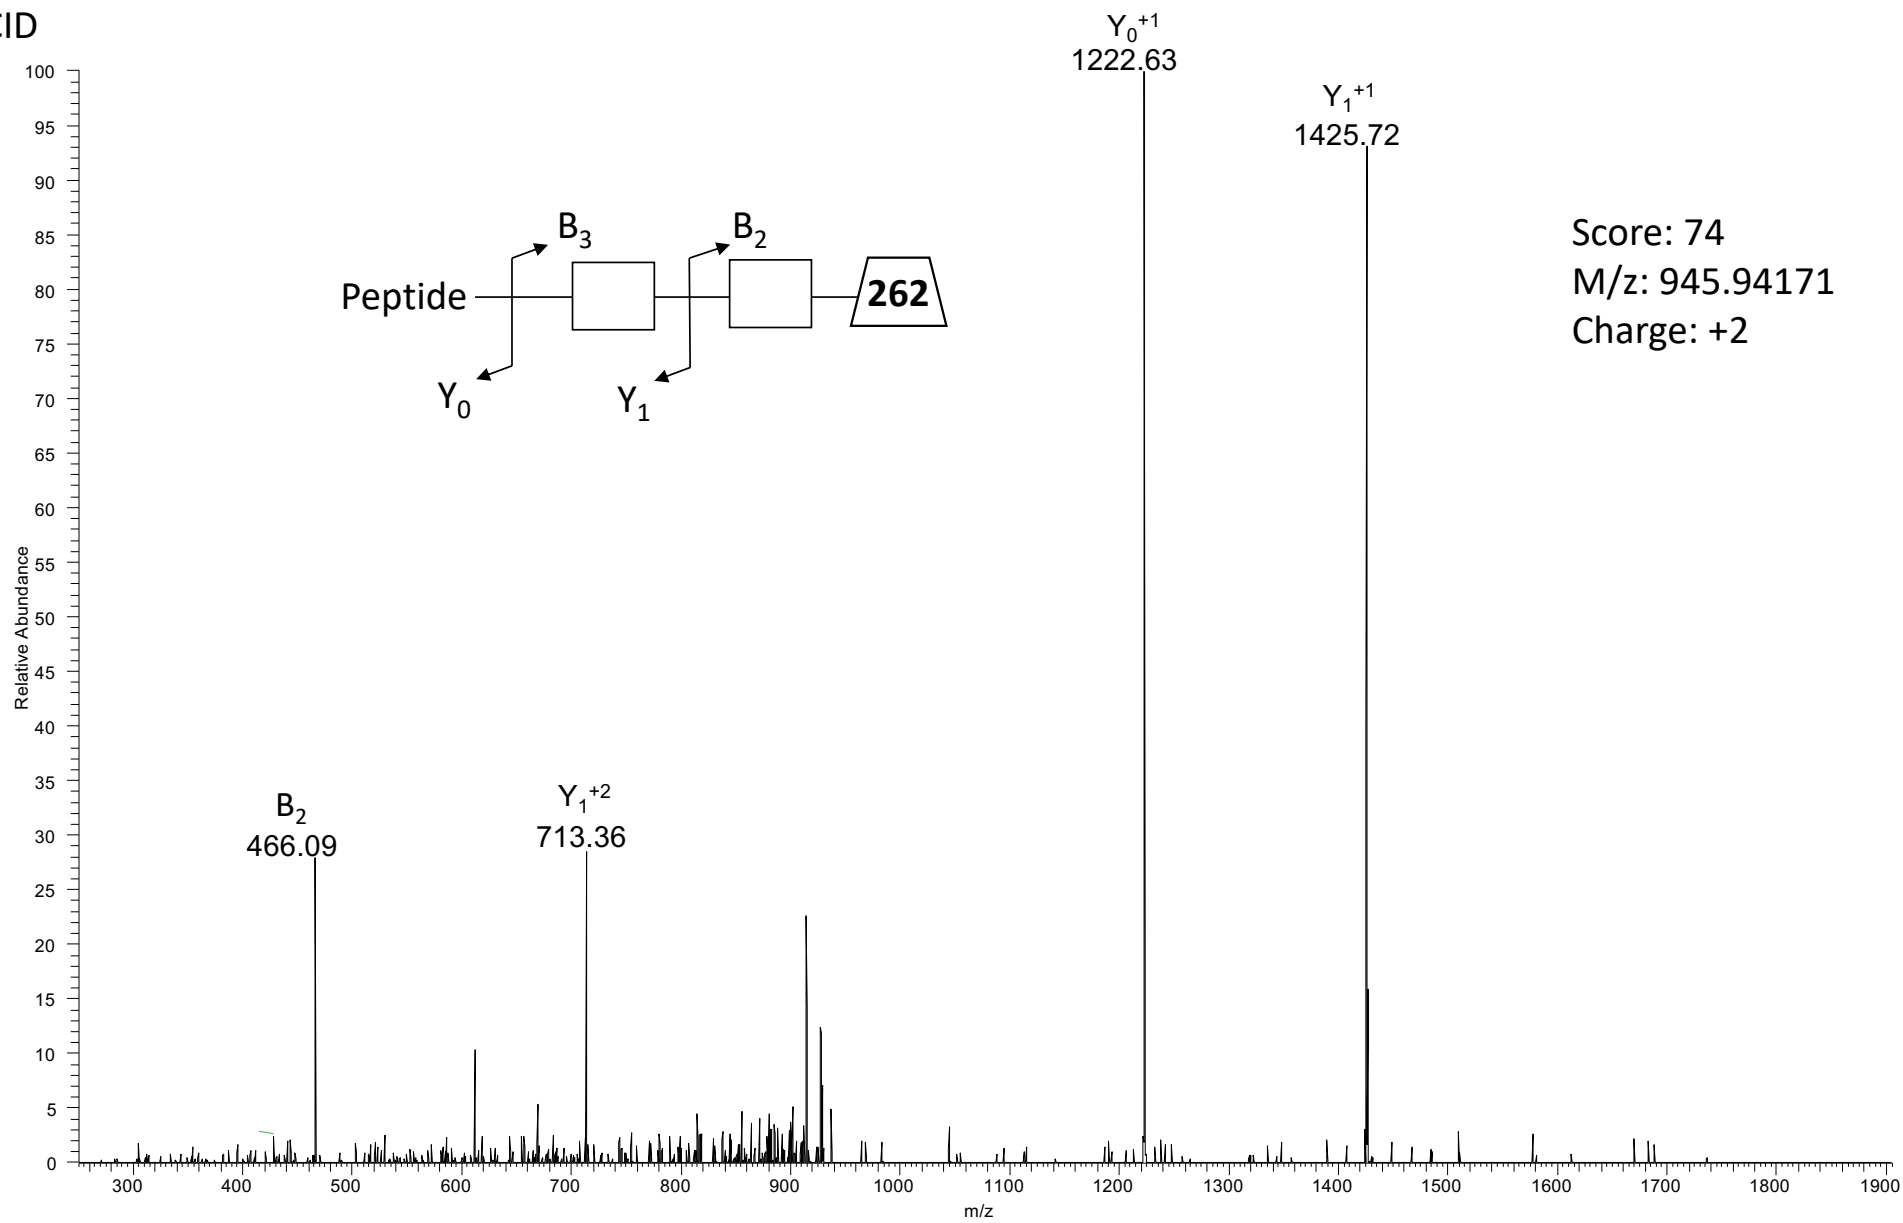

Score: 74

M/z: 945.94171

Charge: +2

FTMS-HCD

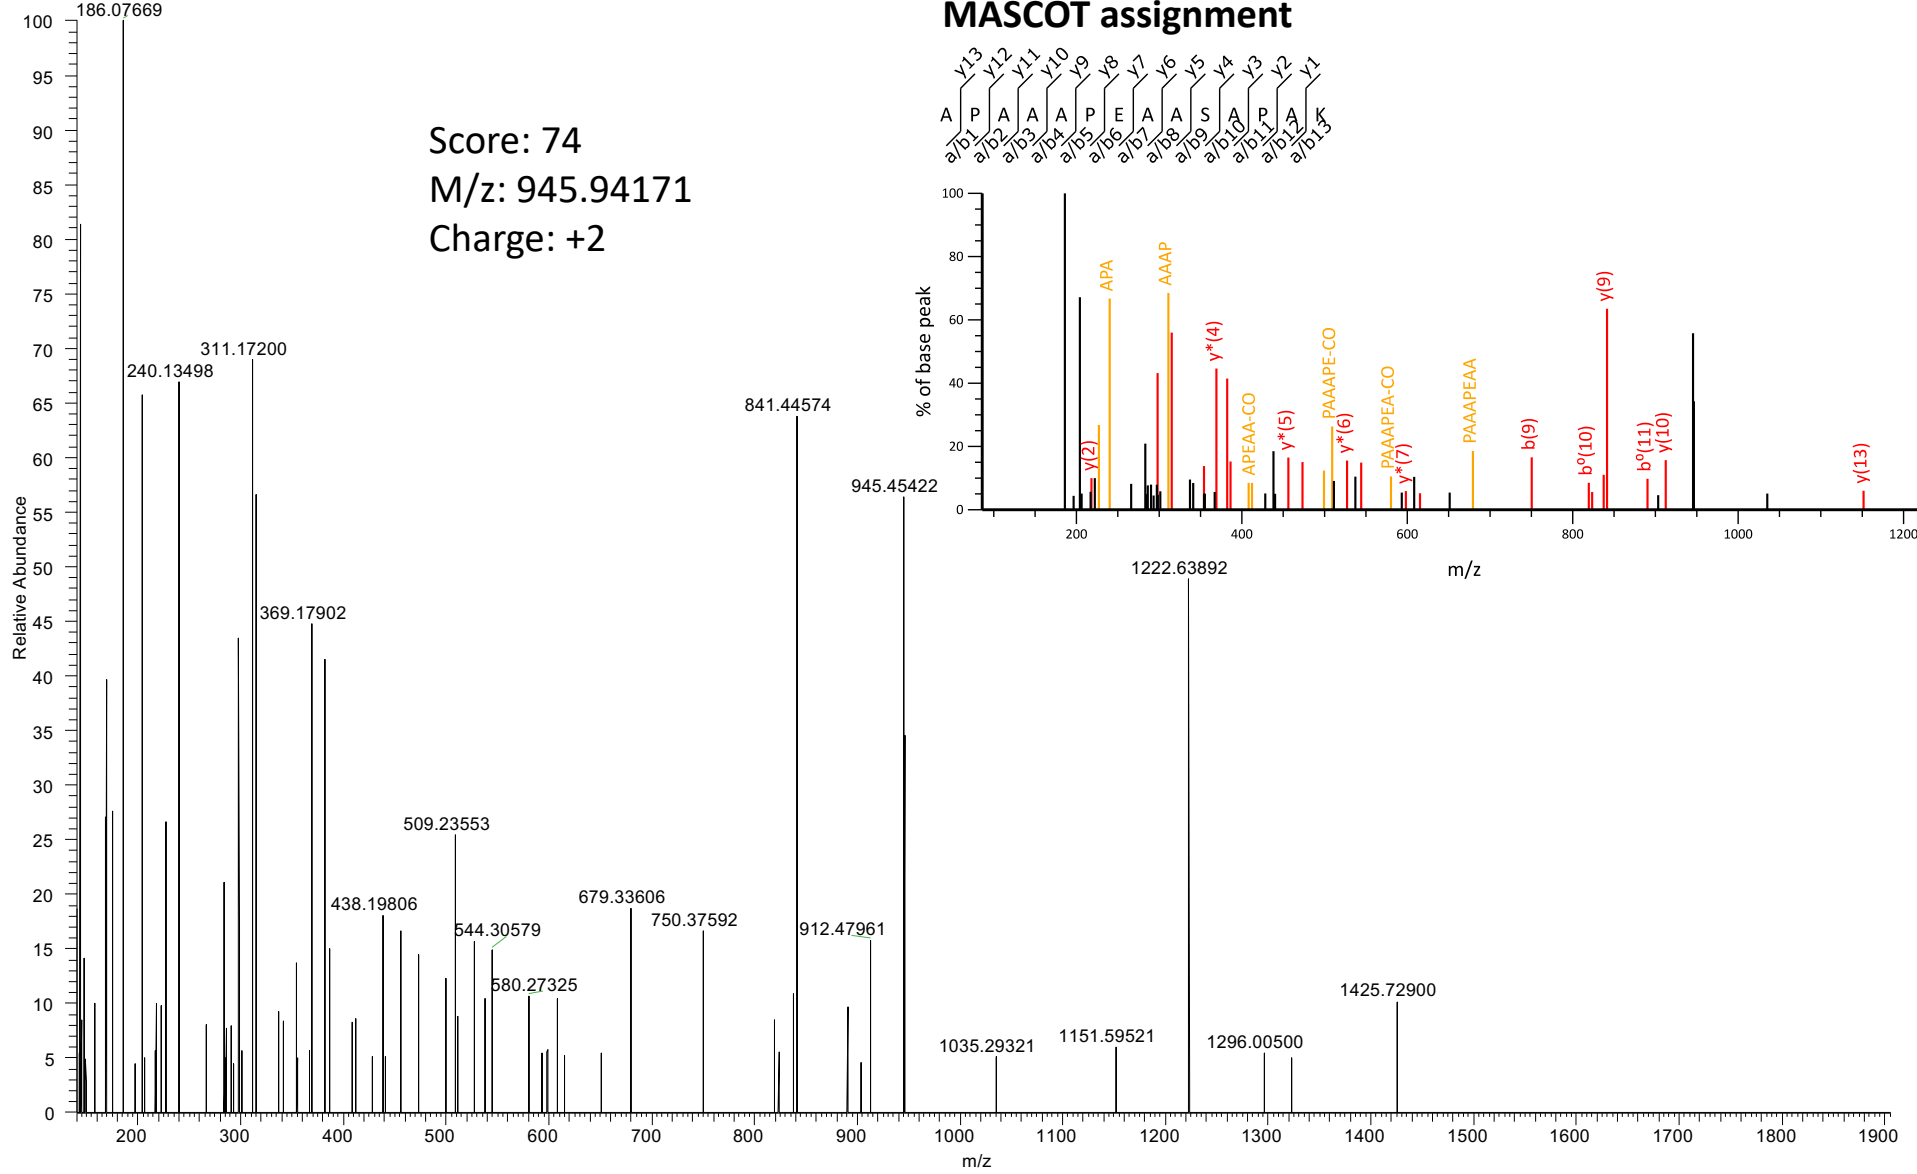

MASCOT assignment

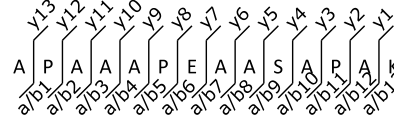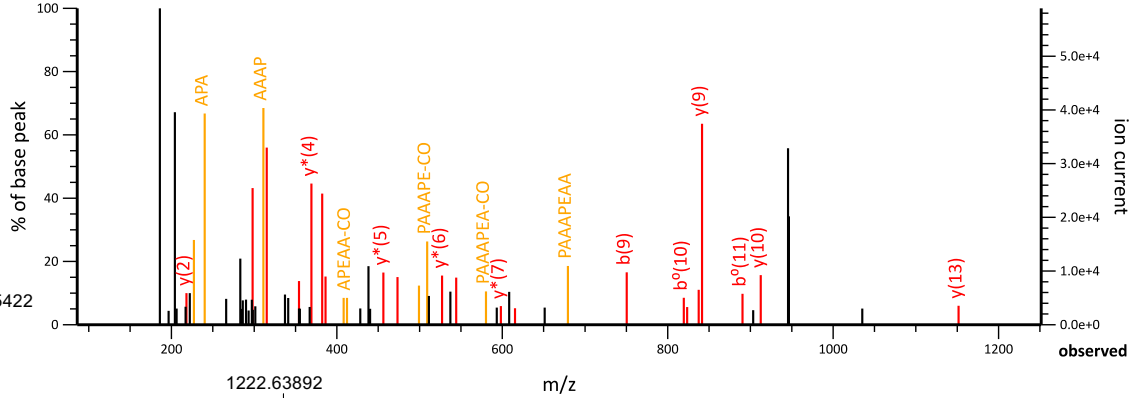

ion current  
5.0e+4  
4.0e+4  
3.0e+4  
2.0e+4  
1.0e+4  
0.0e+0  
observed



ITMS-CID

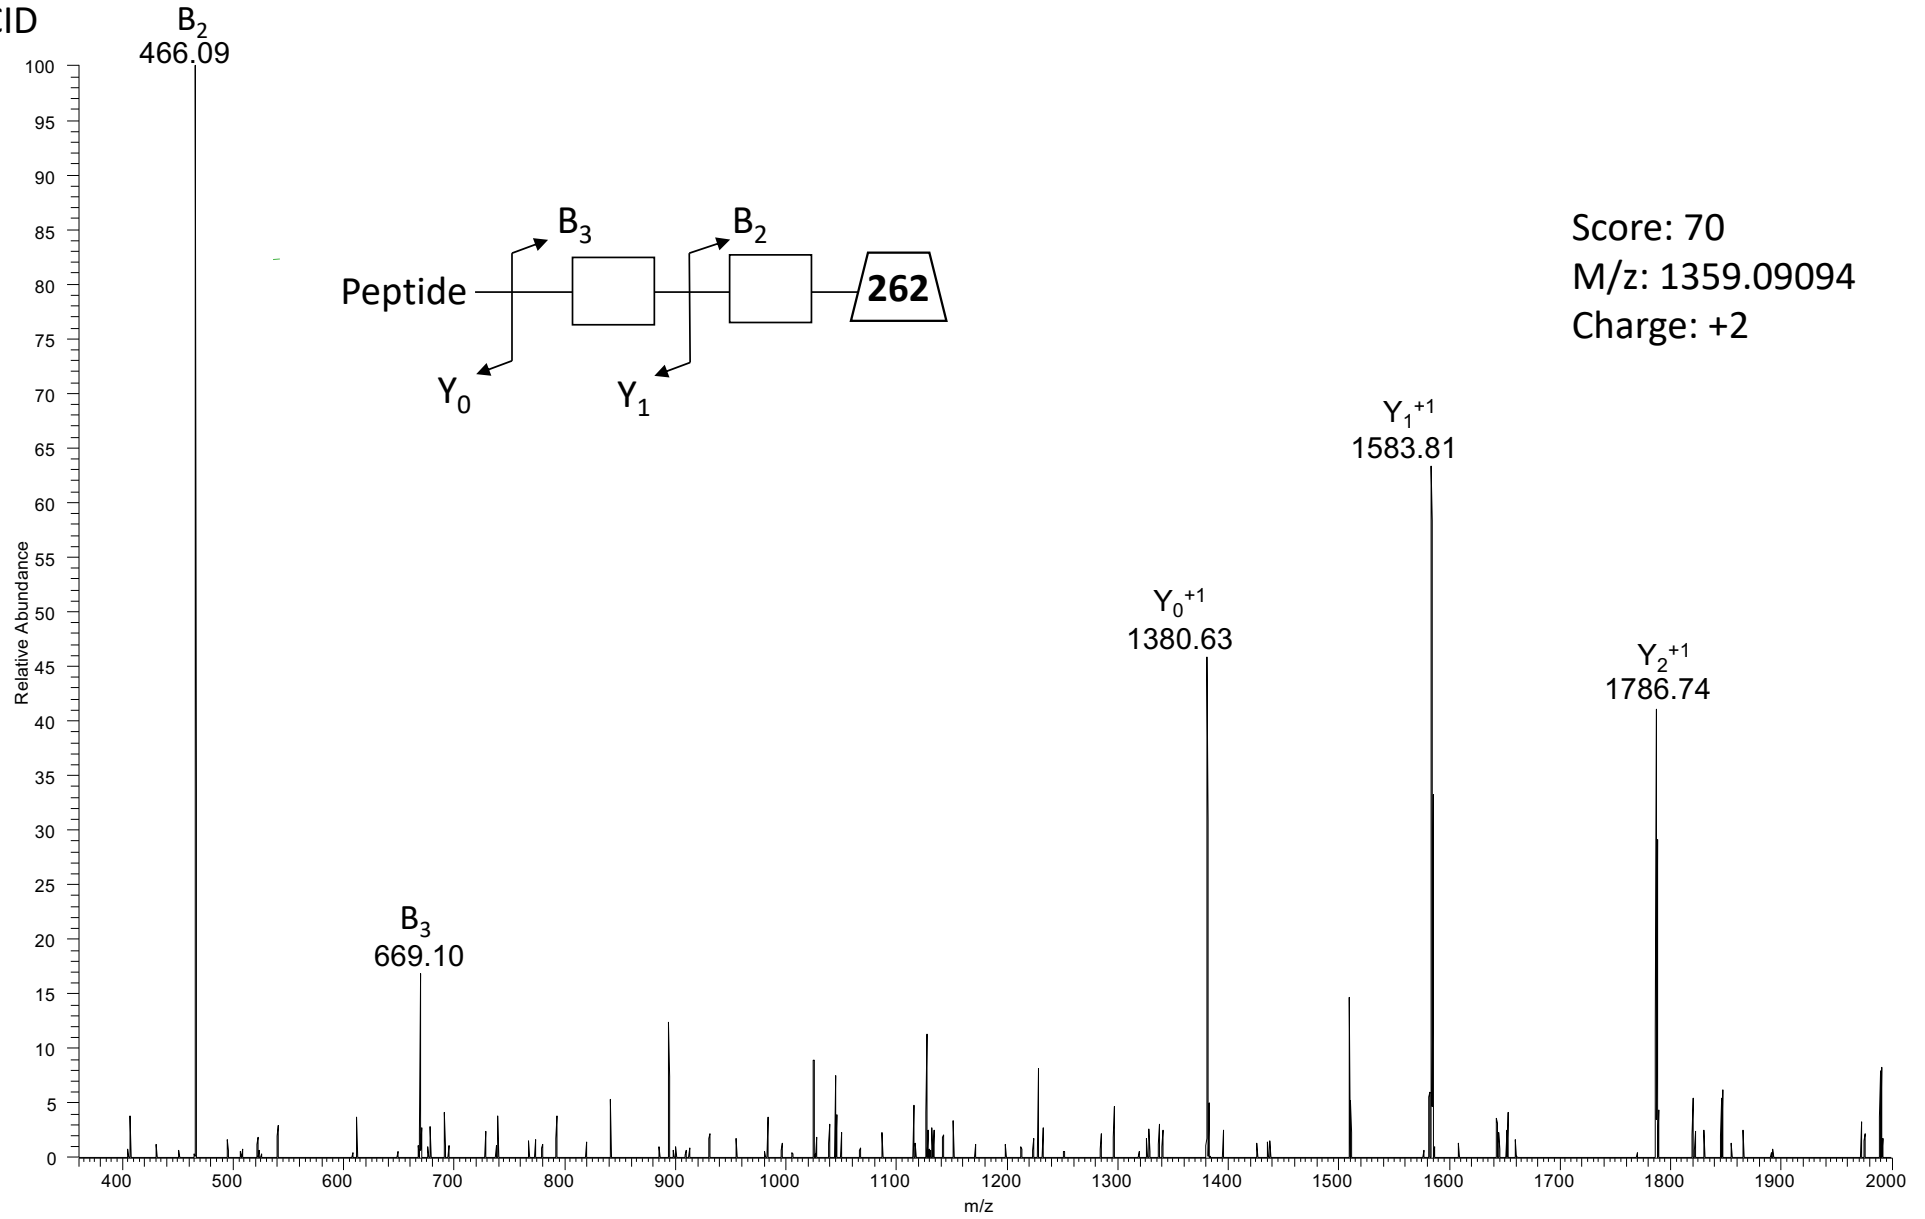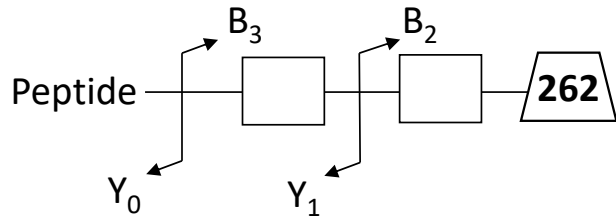

Score: 70  
M/z: 1359.09094  
Charge: +2

FTMS-HCD

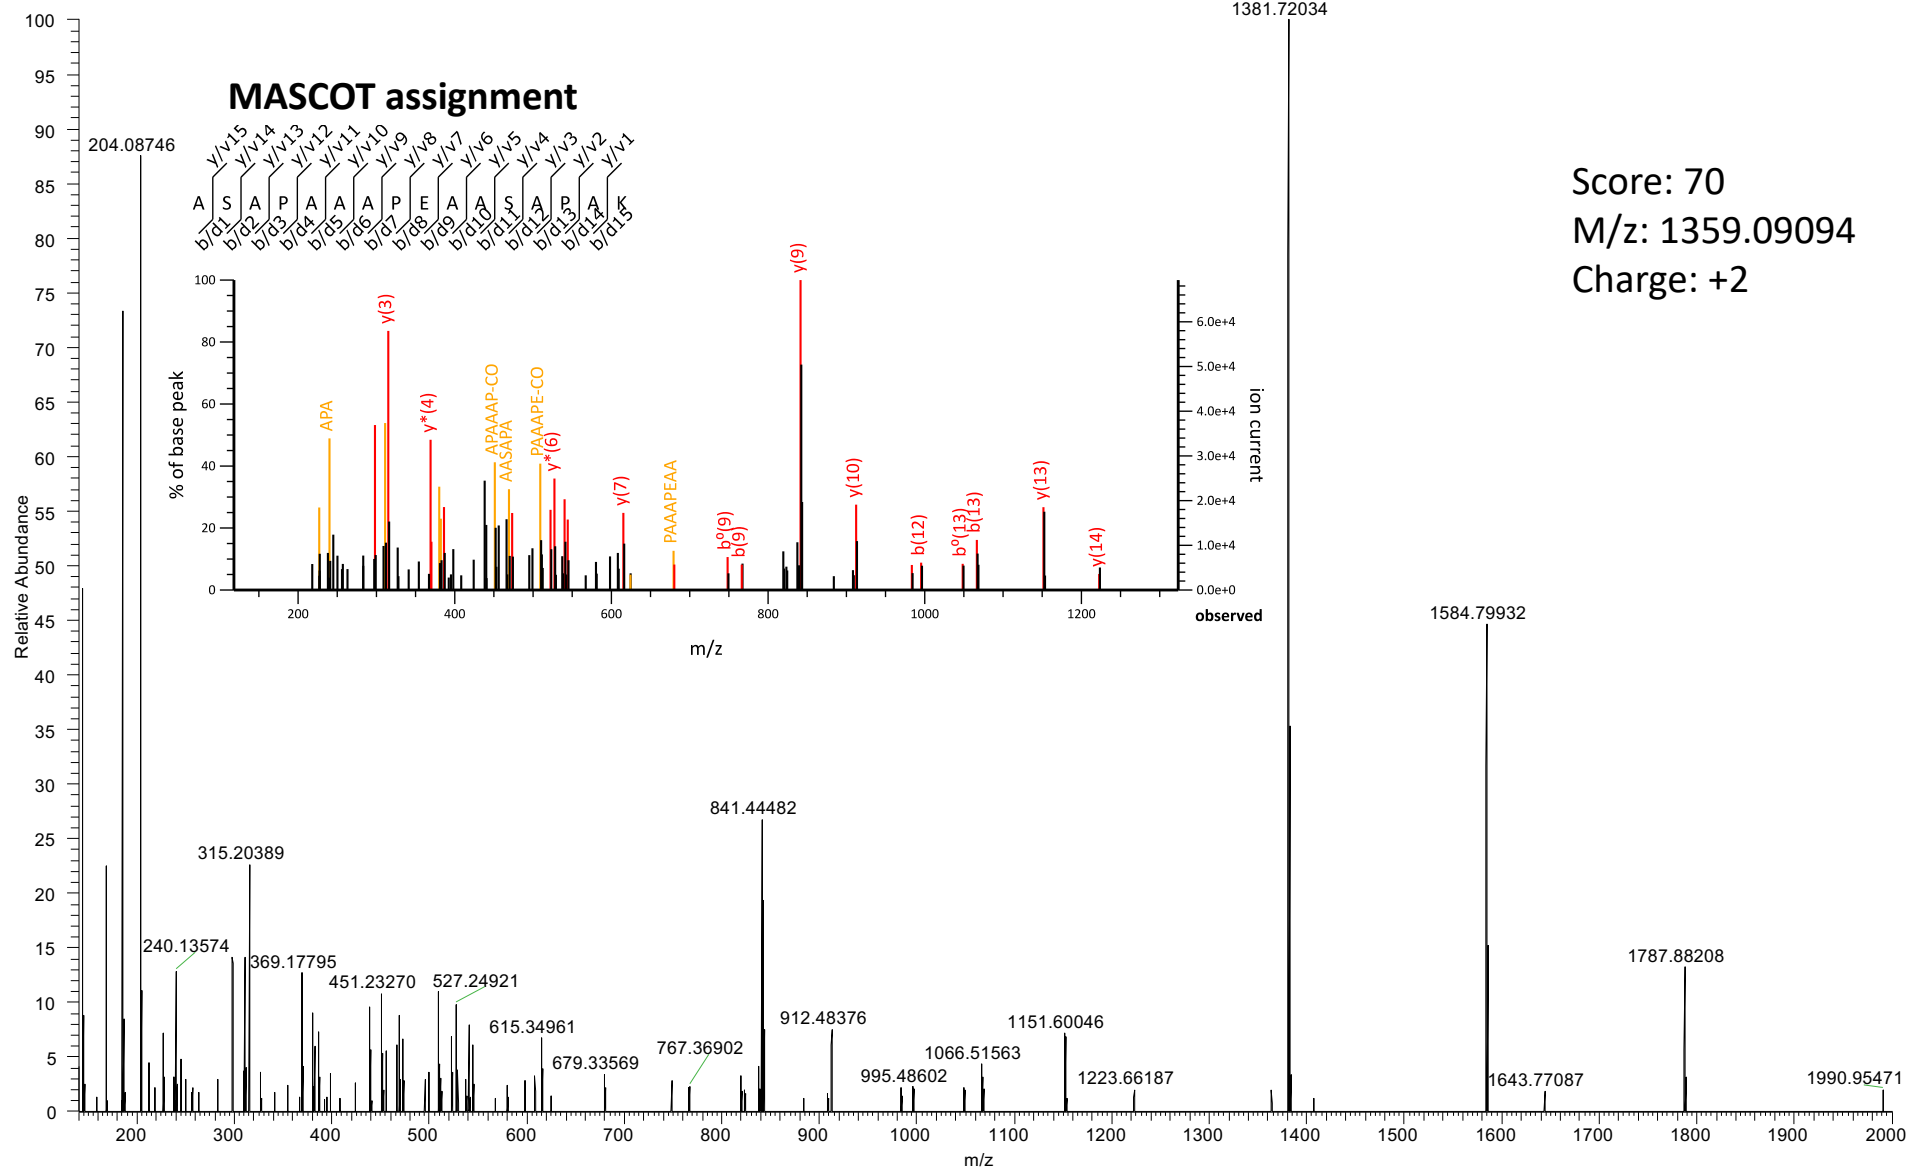

# ITMS-CID

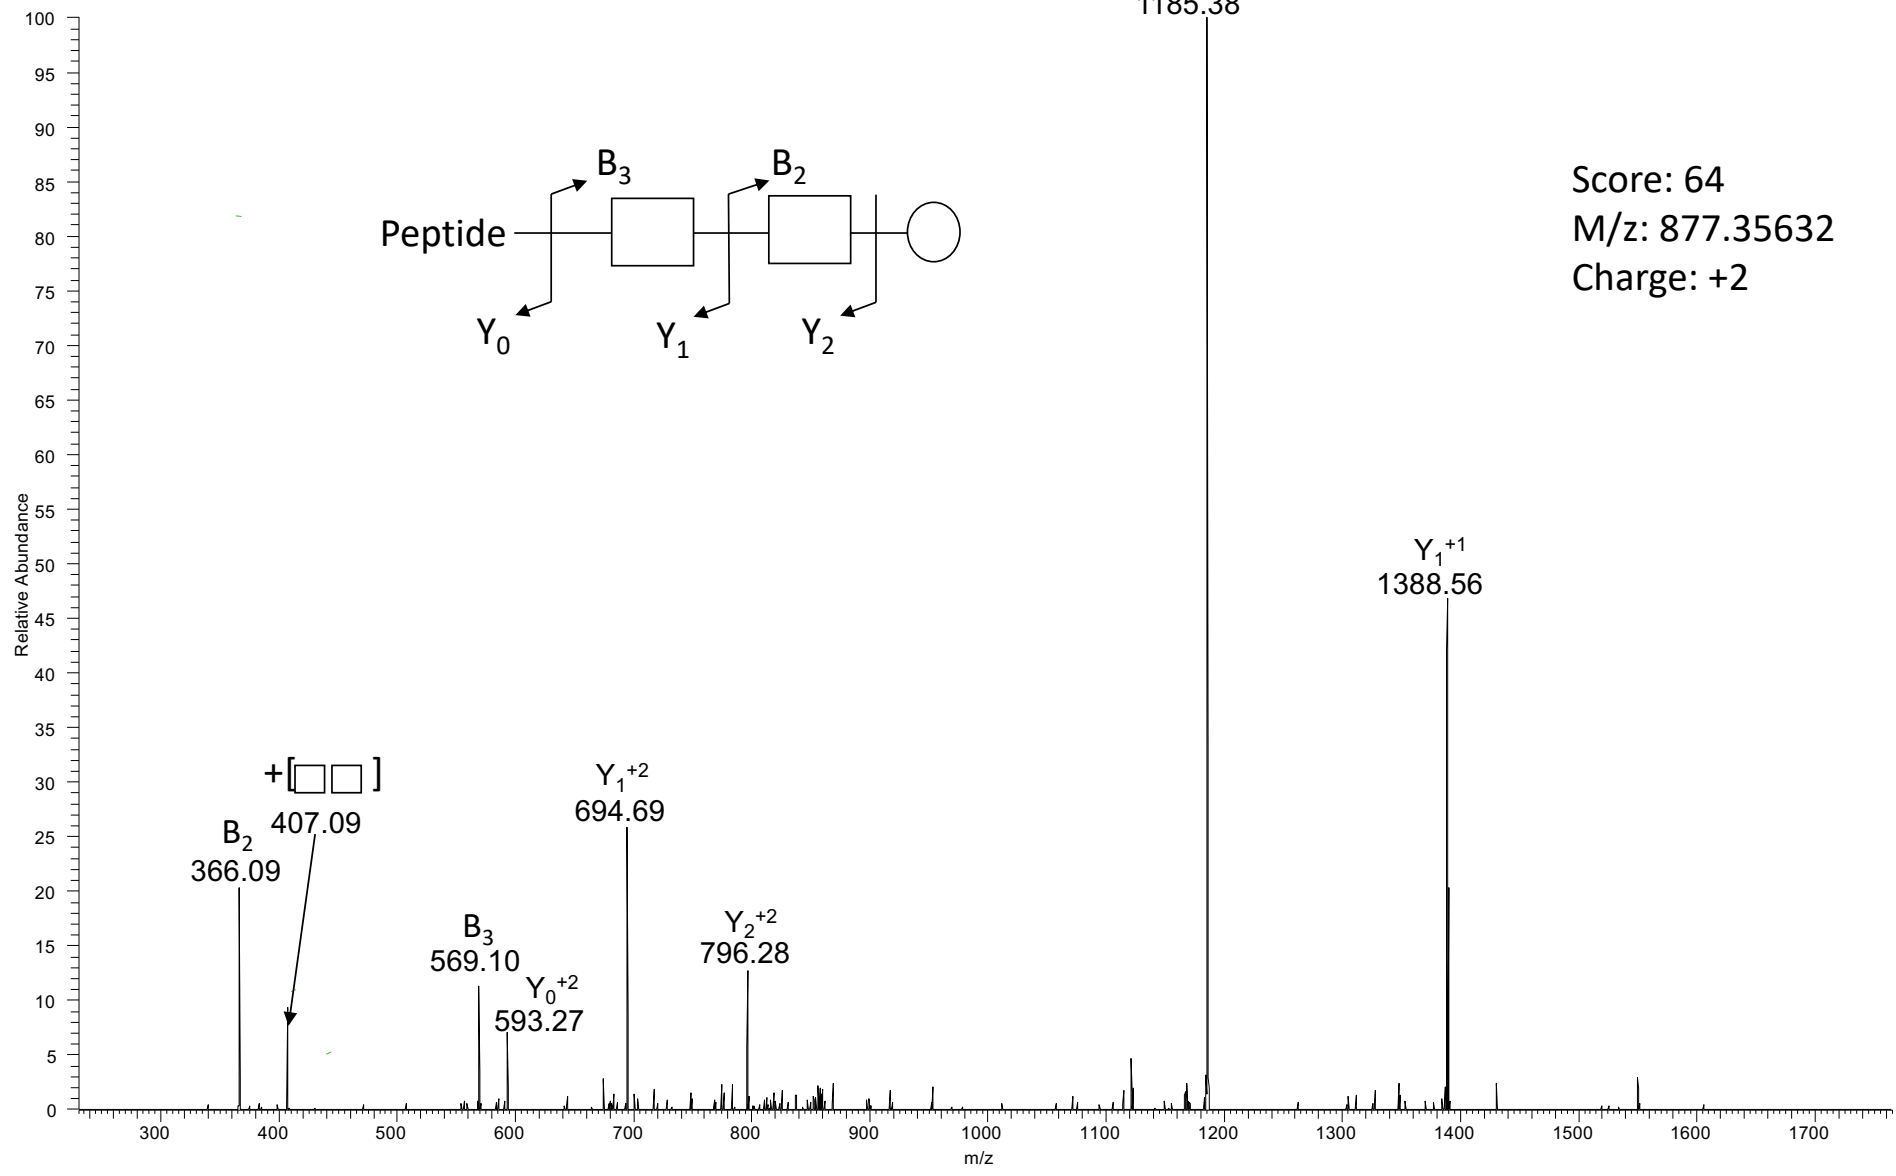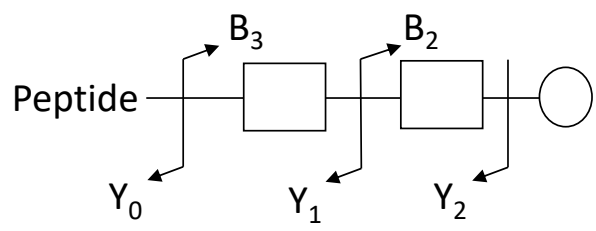

Score: 64  
M/z: 877.35632  
Charge: +2

FTMS-HCD

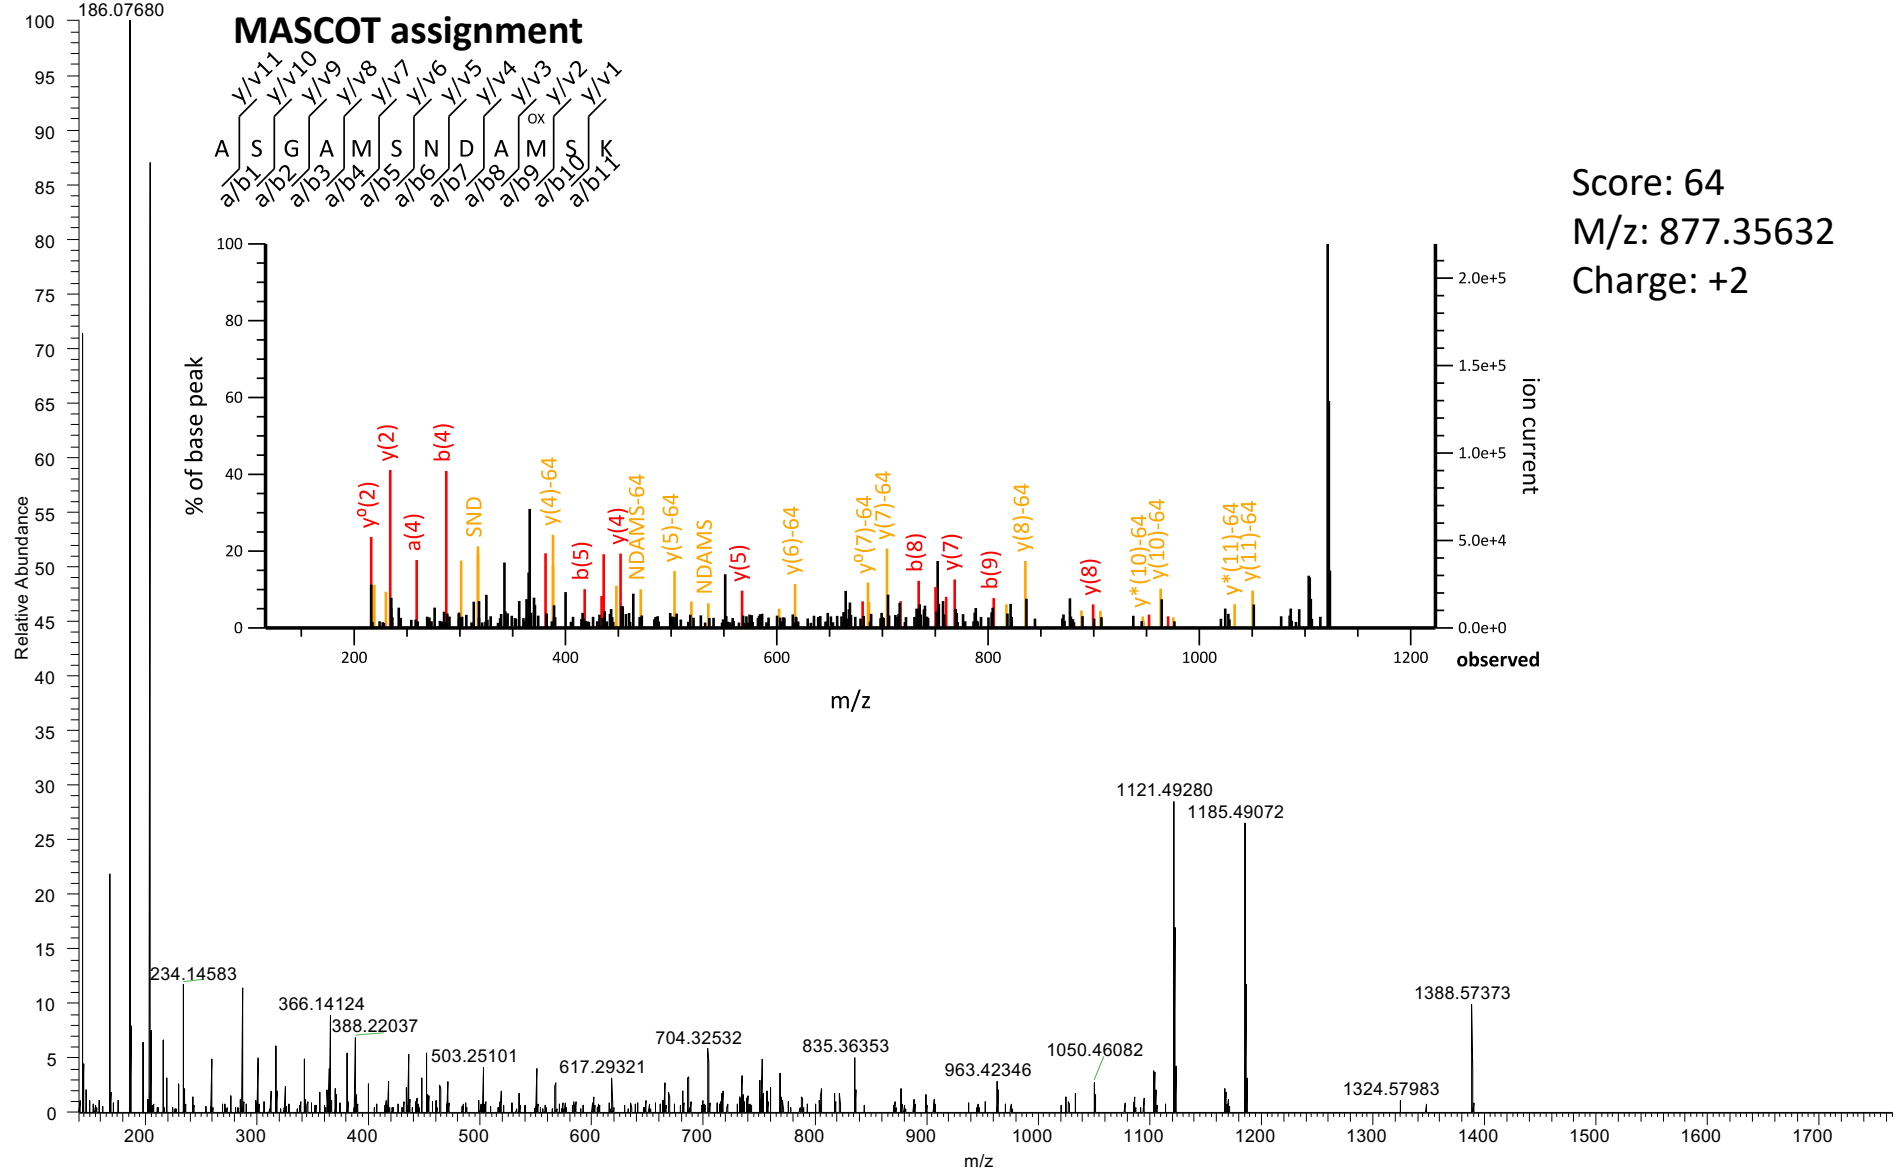

ITMS-CID

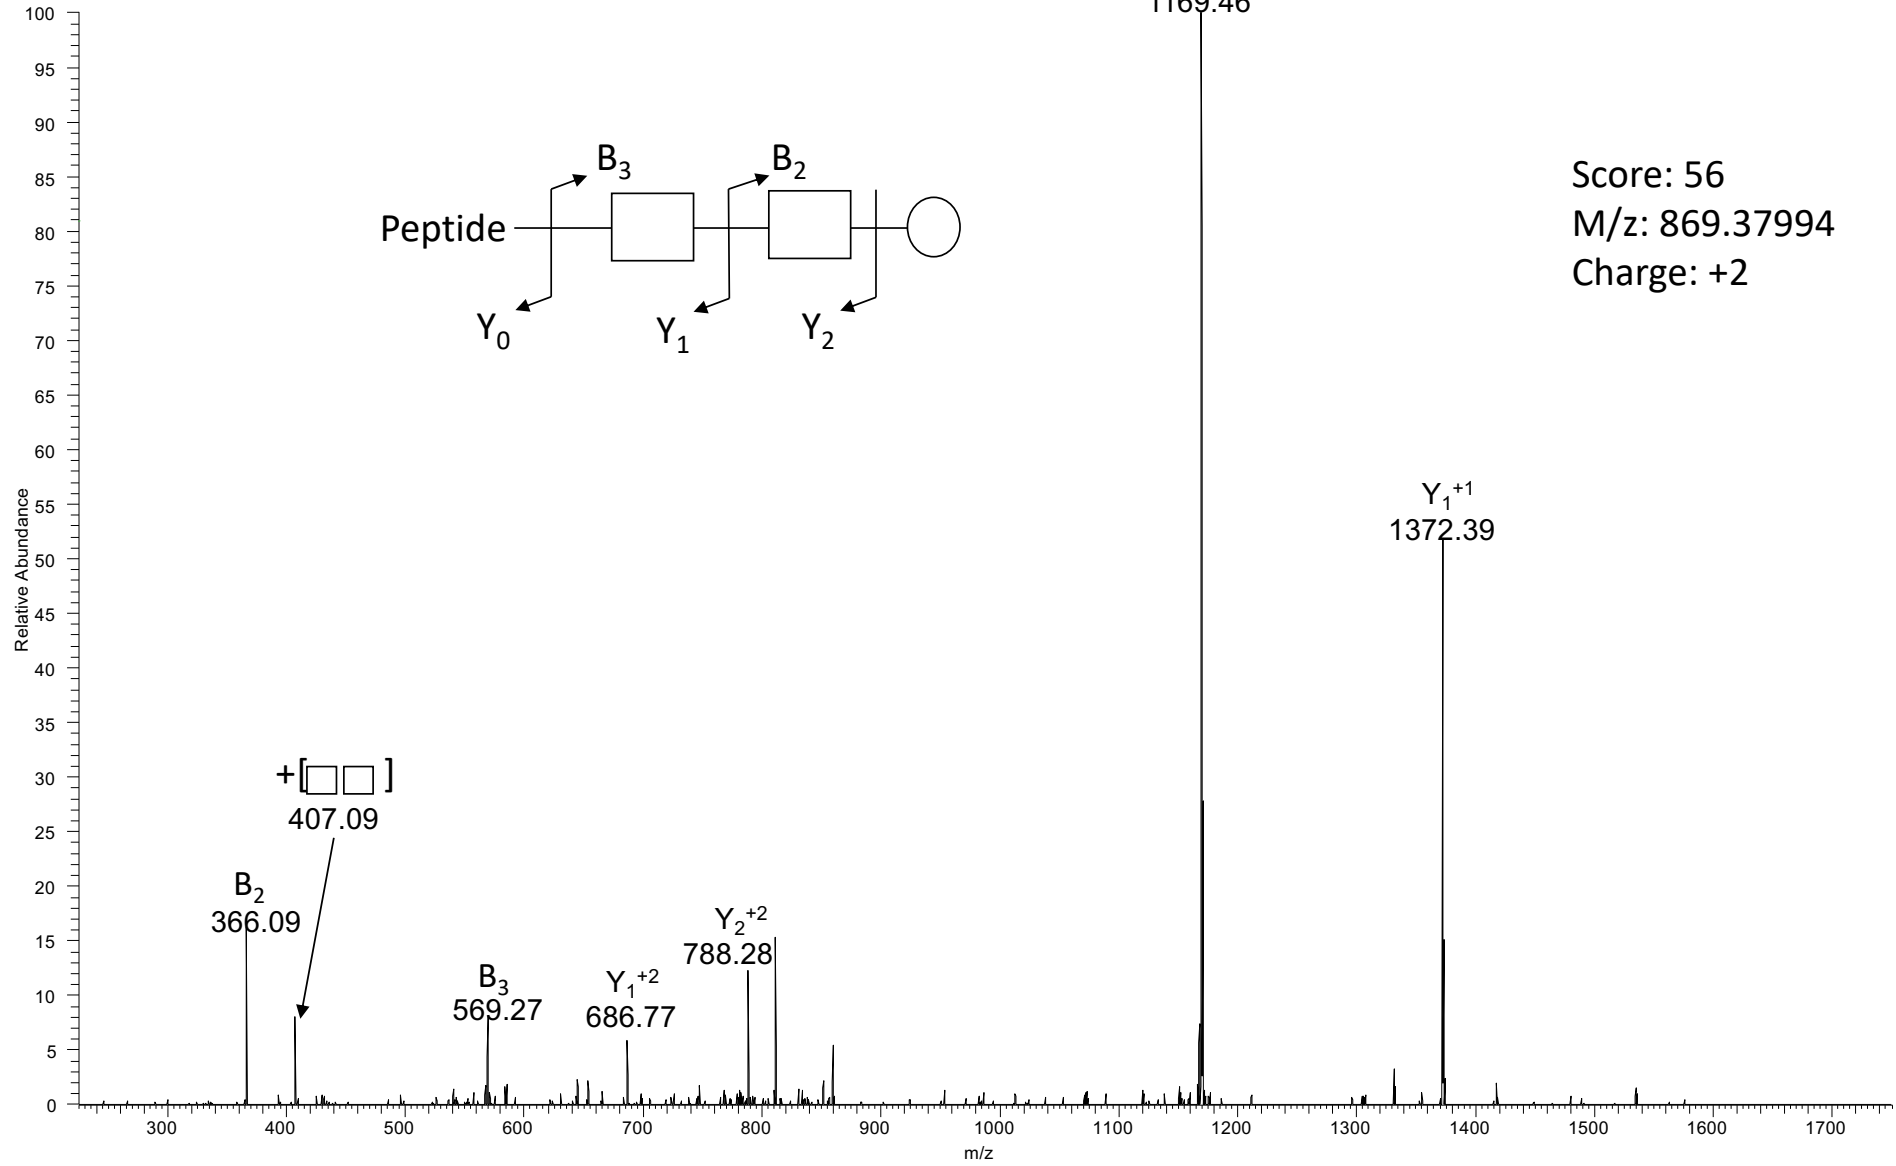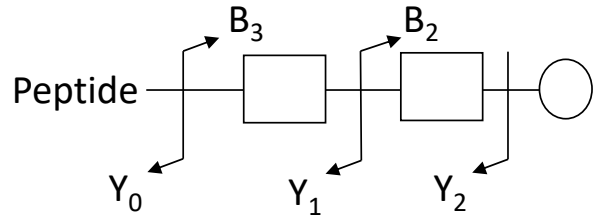

Score: 56  
M/z: 869.37994  
Charge: +2

FTMS-HCD

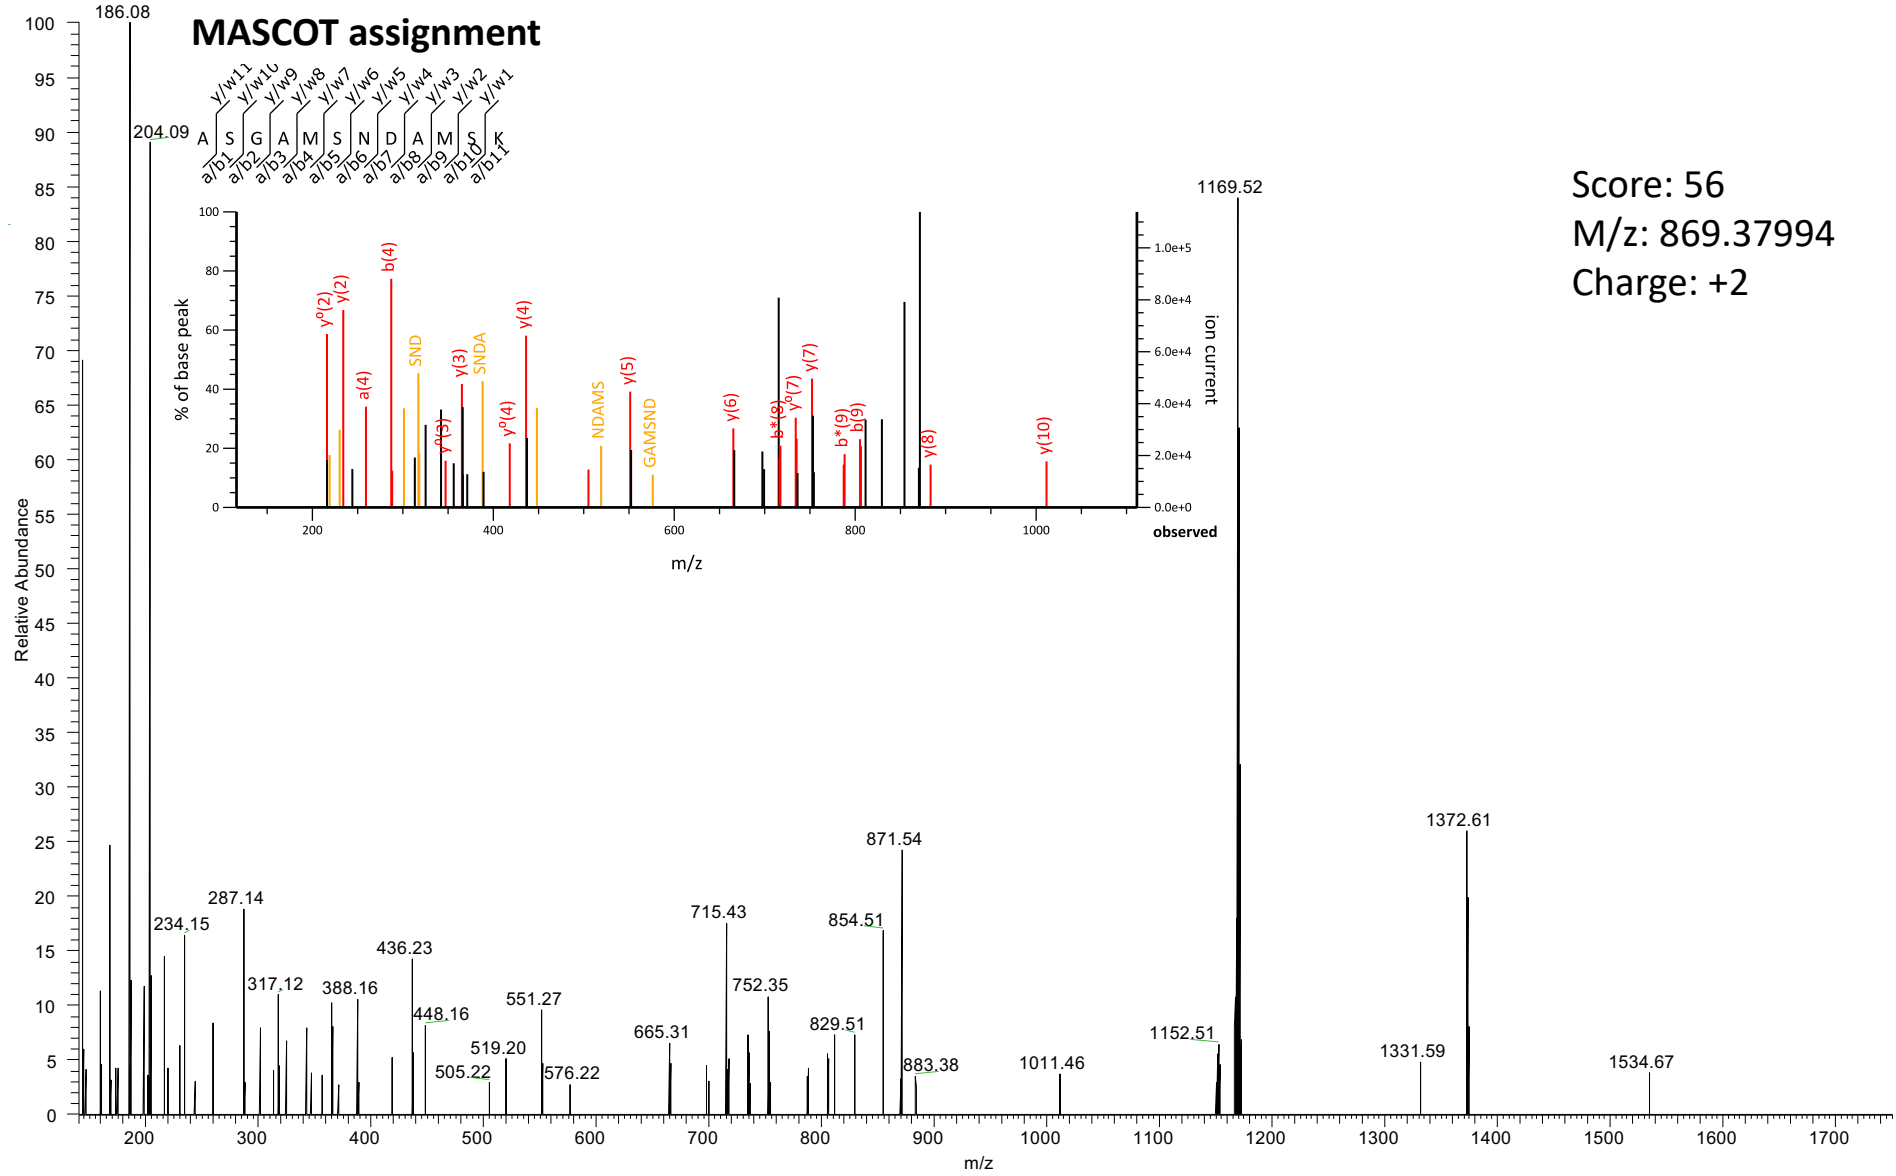

Score: 56  
M/z: 869.37994  
Charge: +2

# ITMS-CID

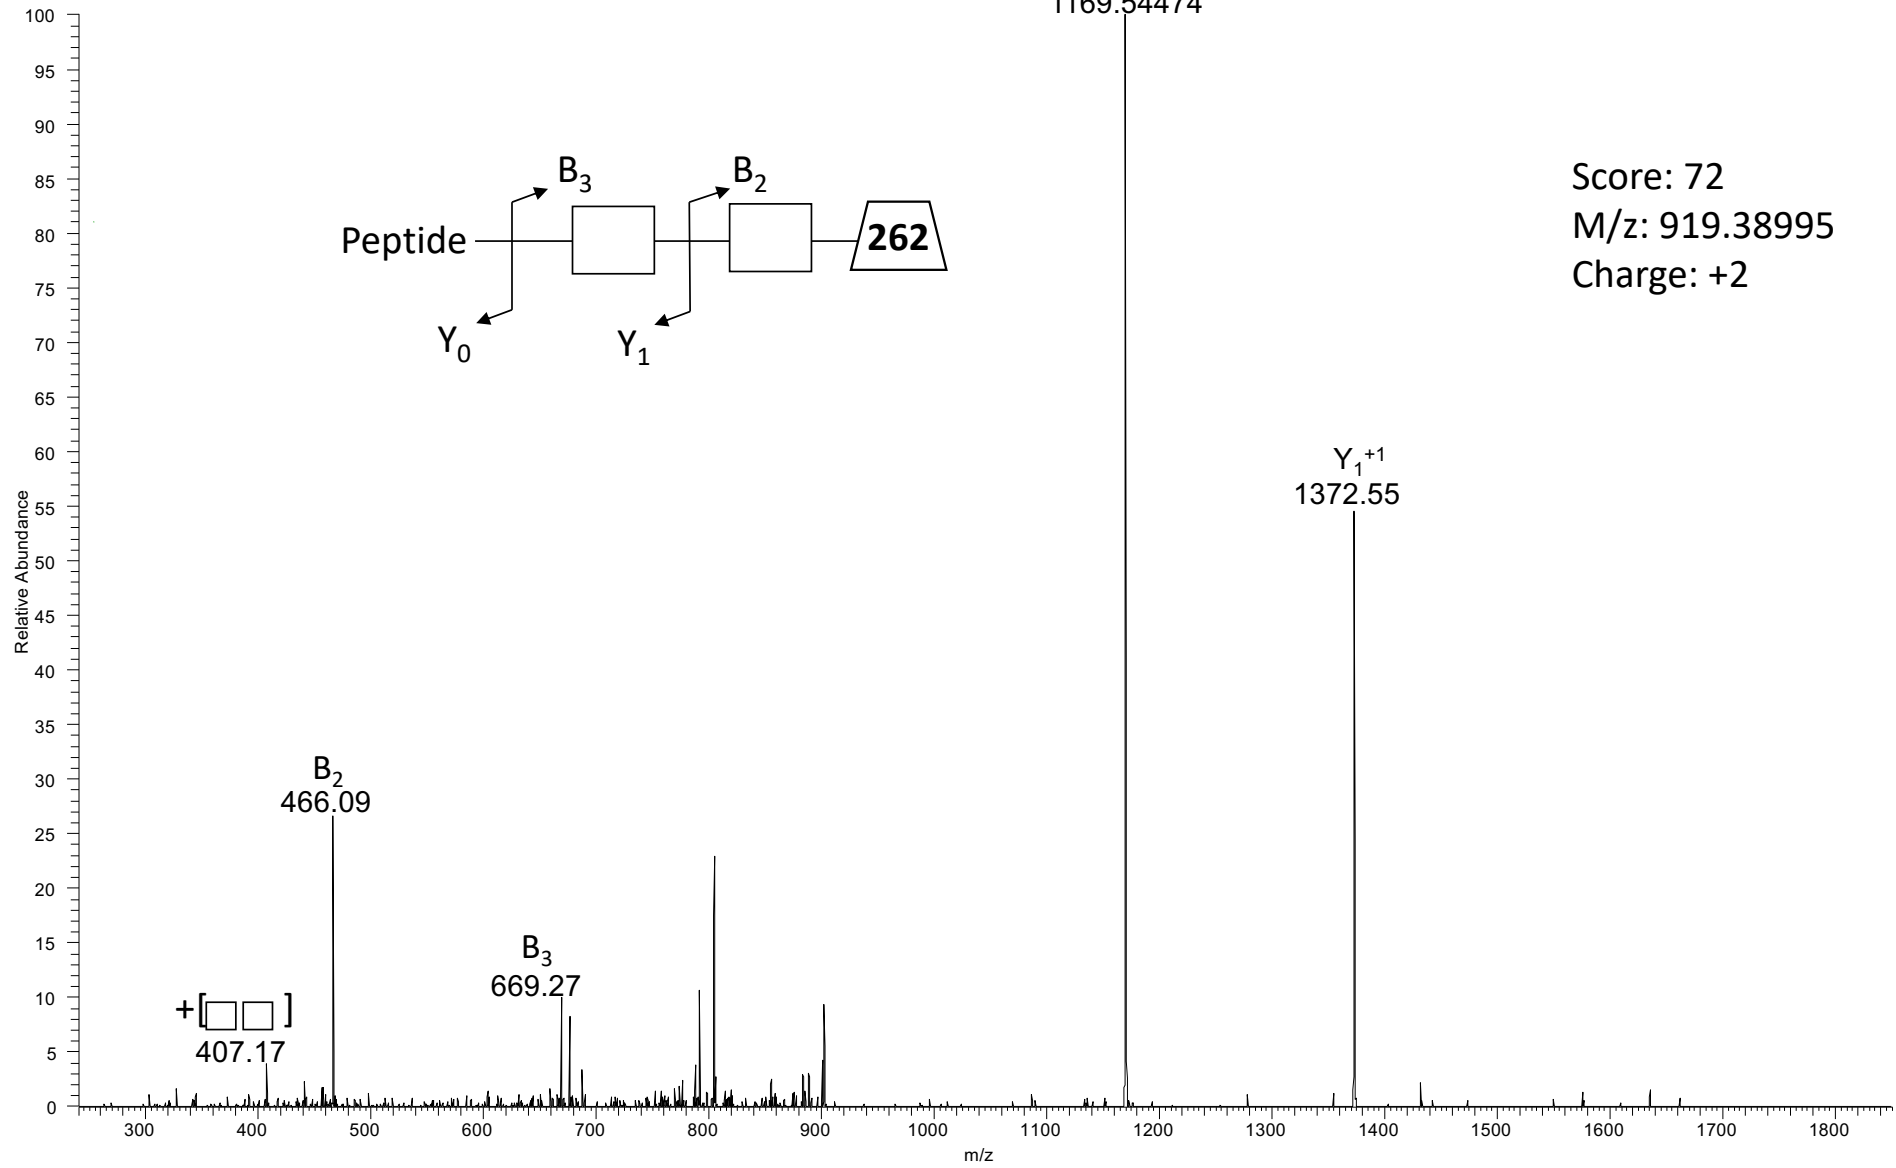

Score: 72  
M/z: 919.38995  
Charge: +2

FTMS-HCD

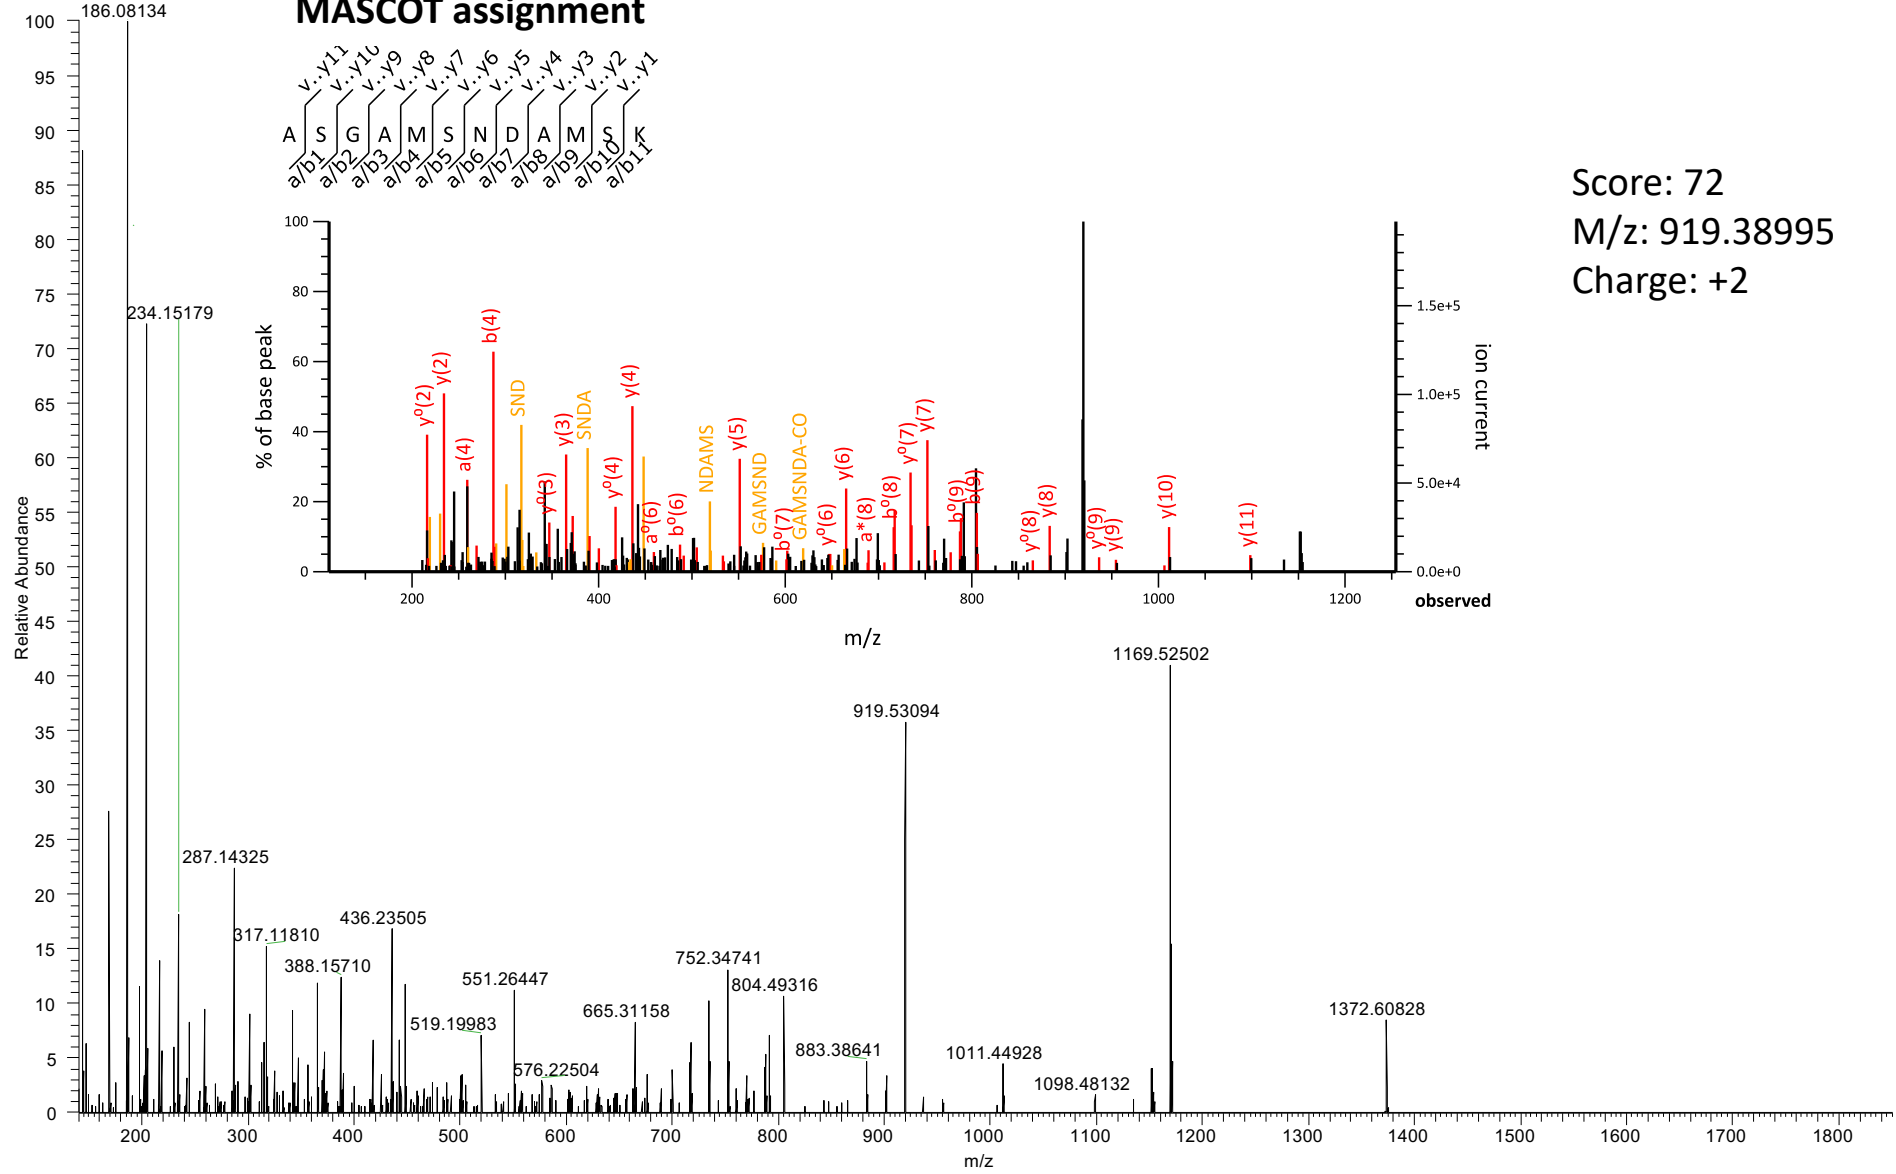



# ITMS-CID

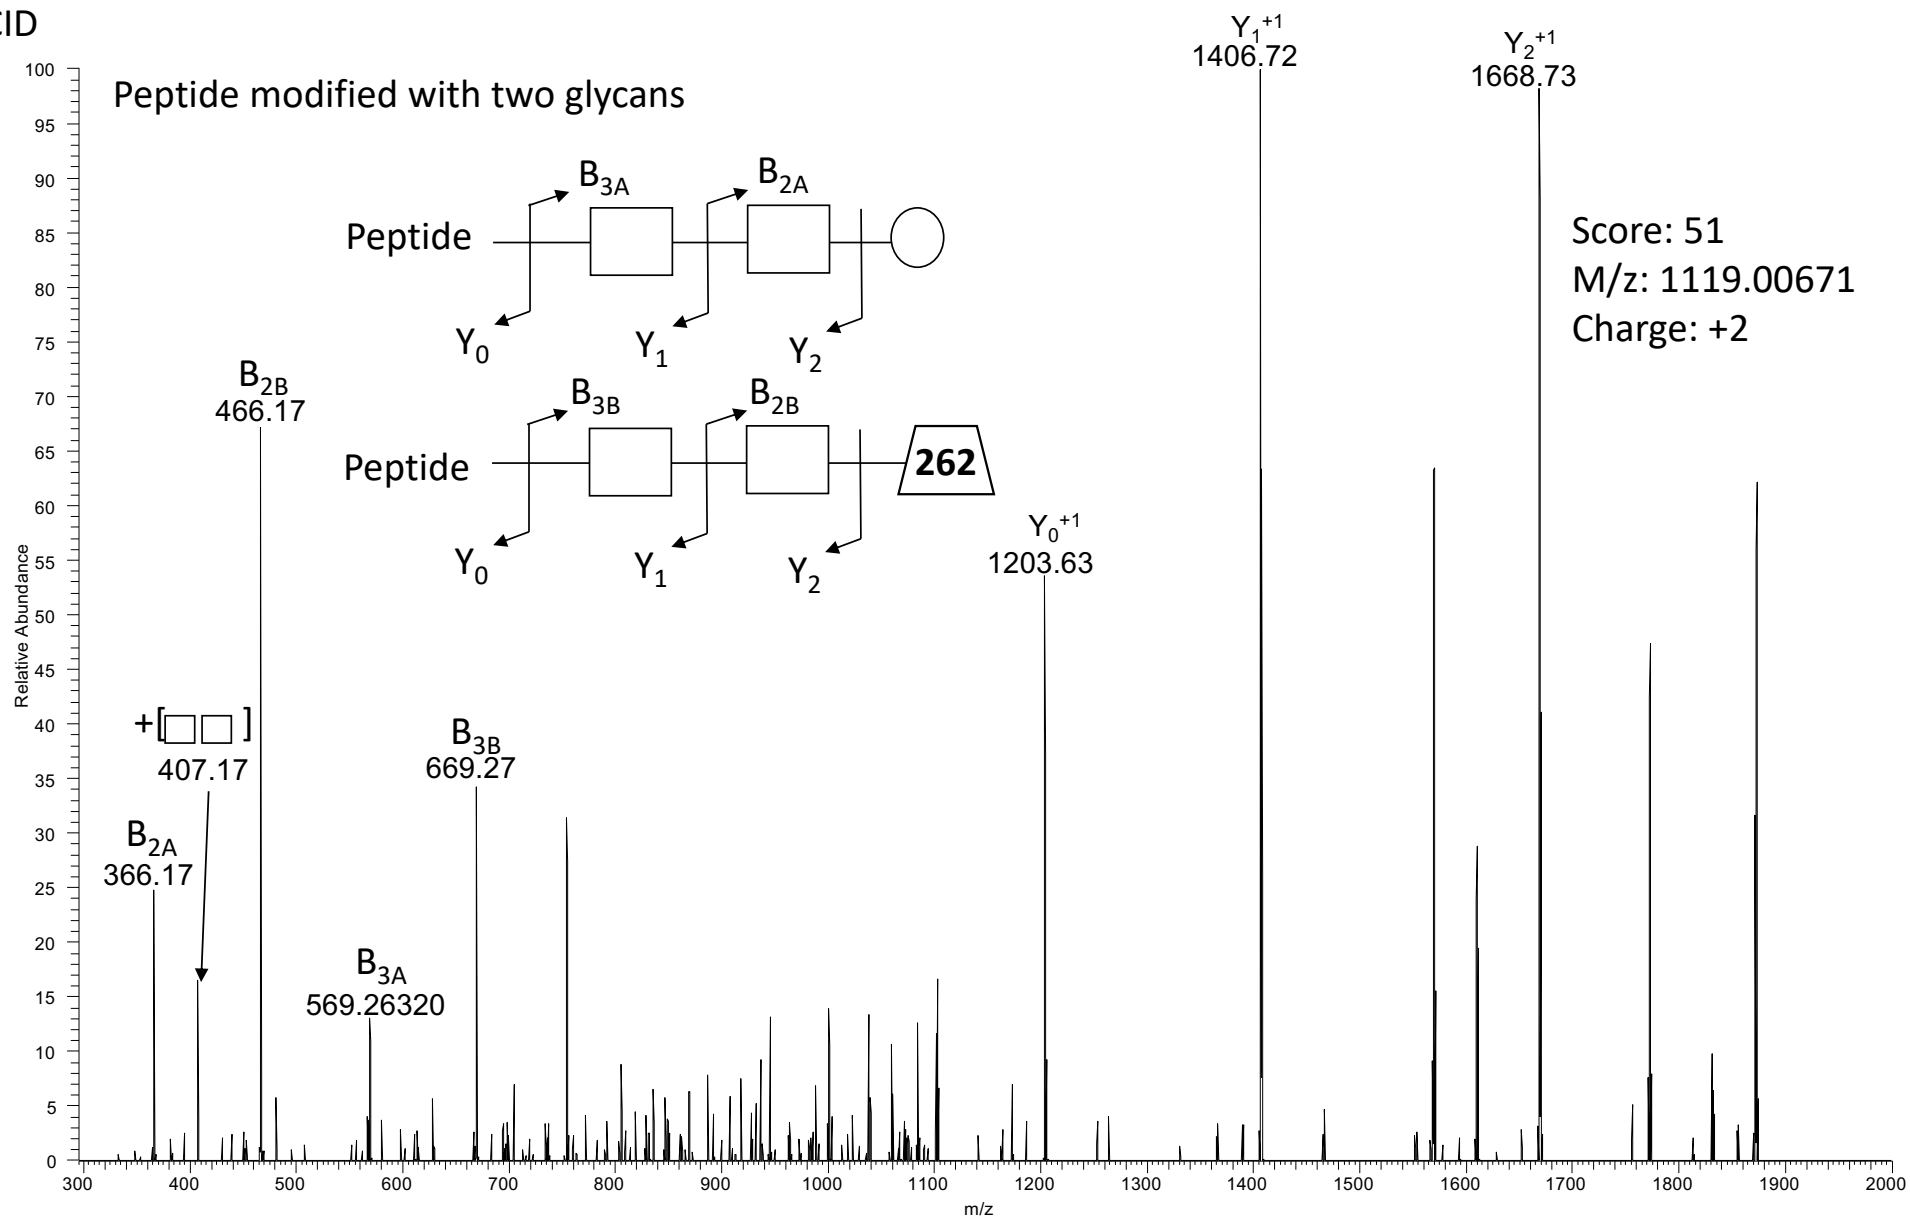

FTMS-HCD

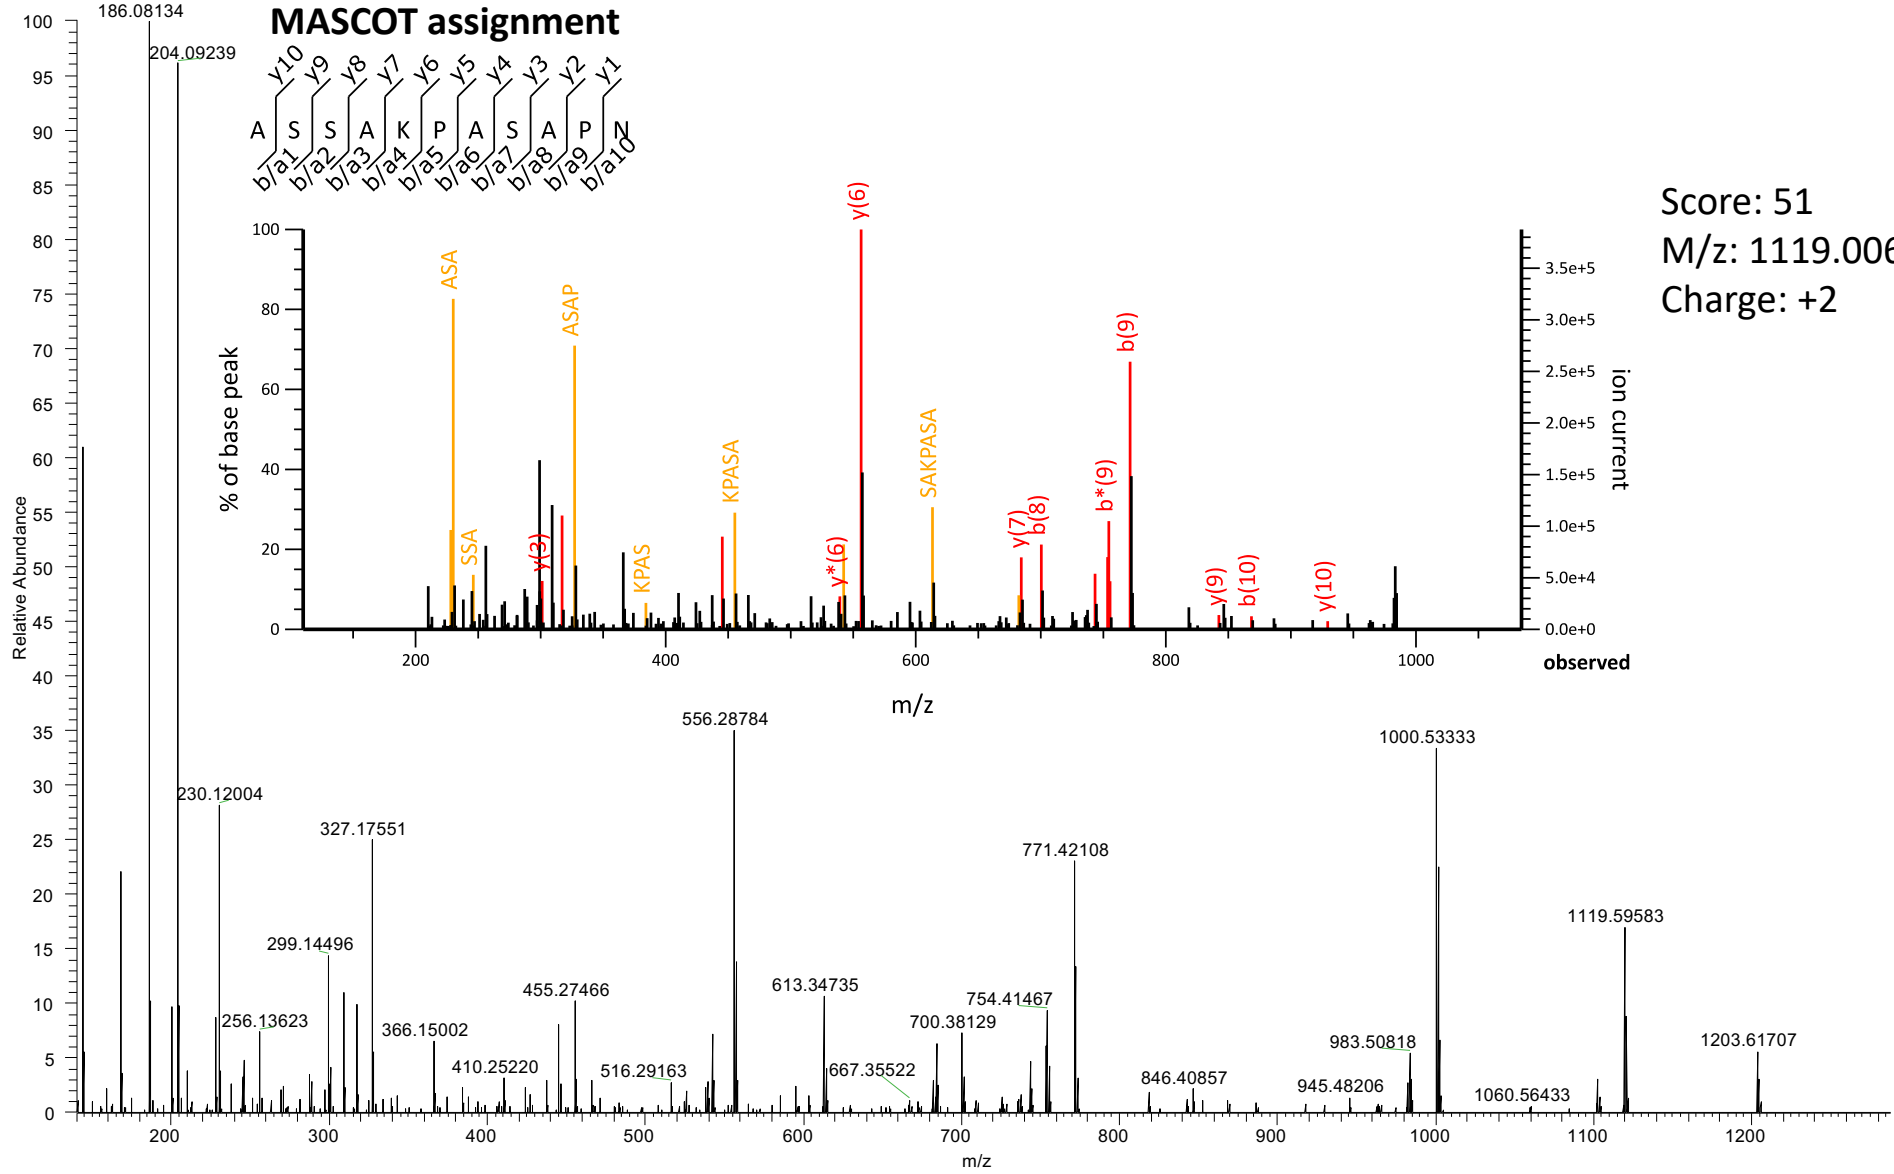

Score: 51  
M/z: 1119.00671  
Charge: +2

# ITMS-CID

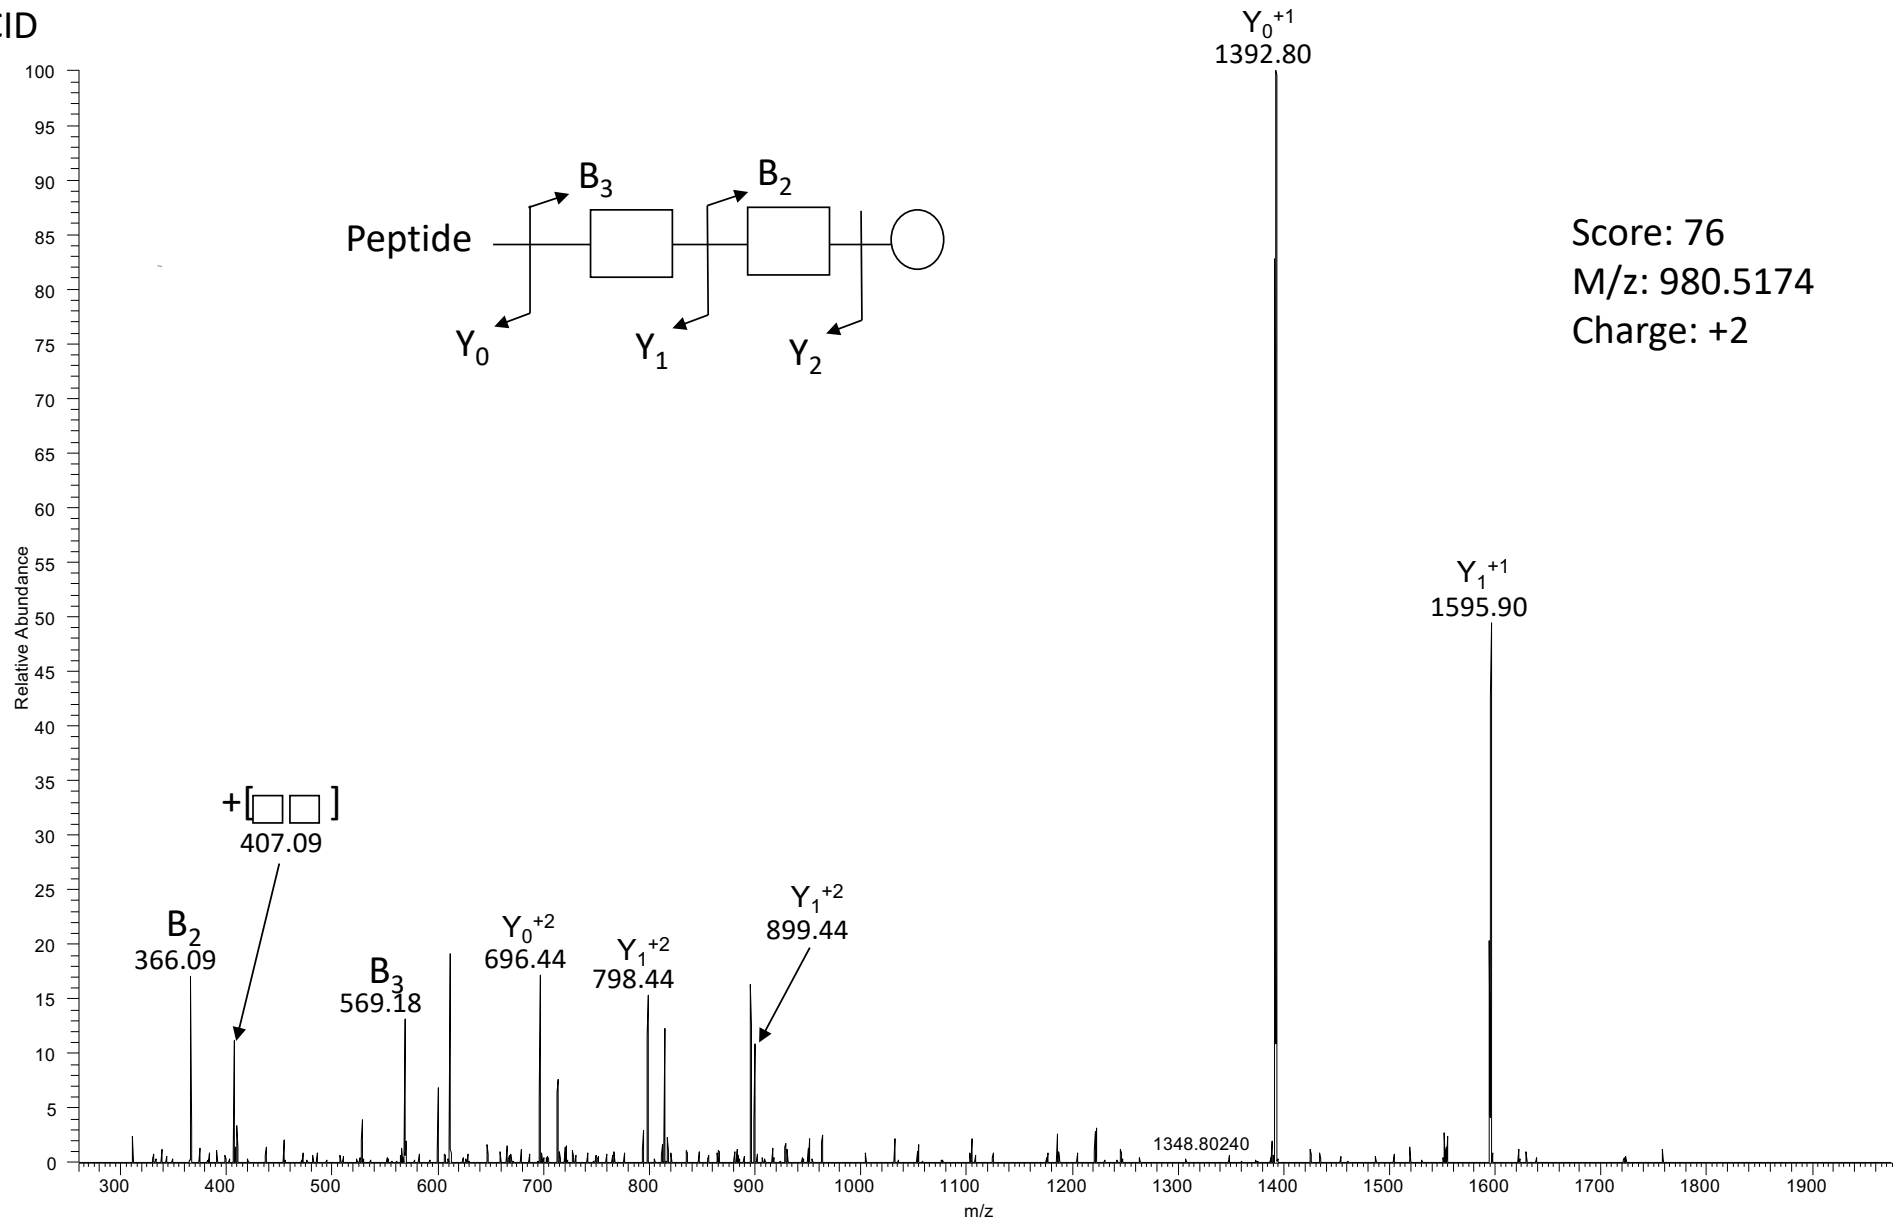

Score: 76  
M/z: 980.5174  
Charge: +2

FTMS-HCD

Score: 76  
M/z: 980.5174  
Charge: +2

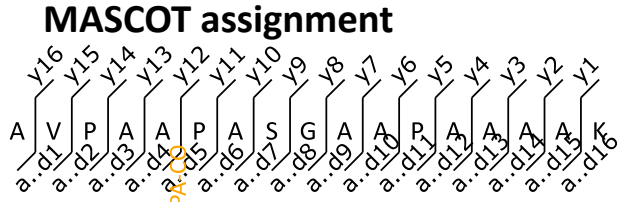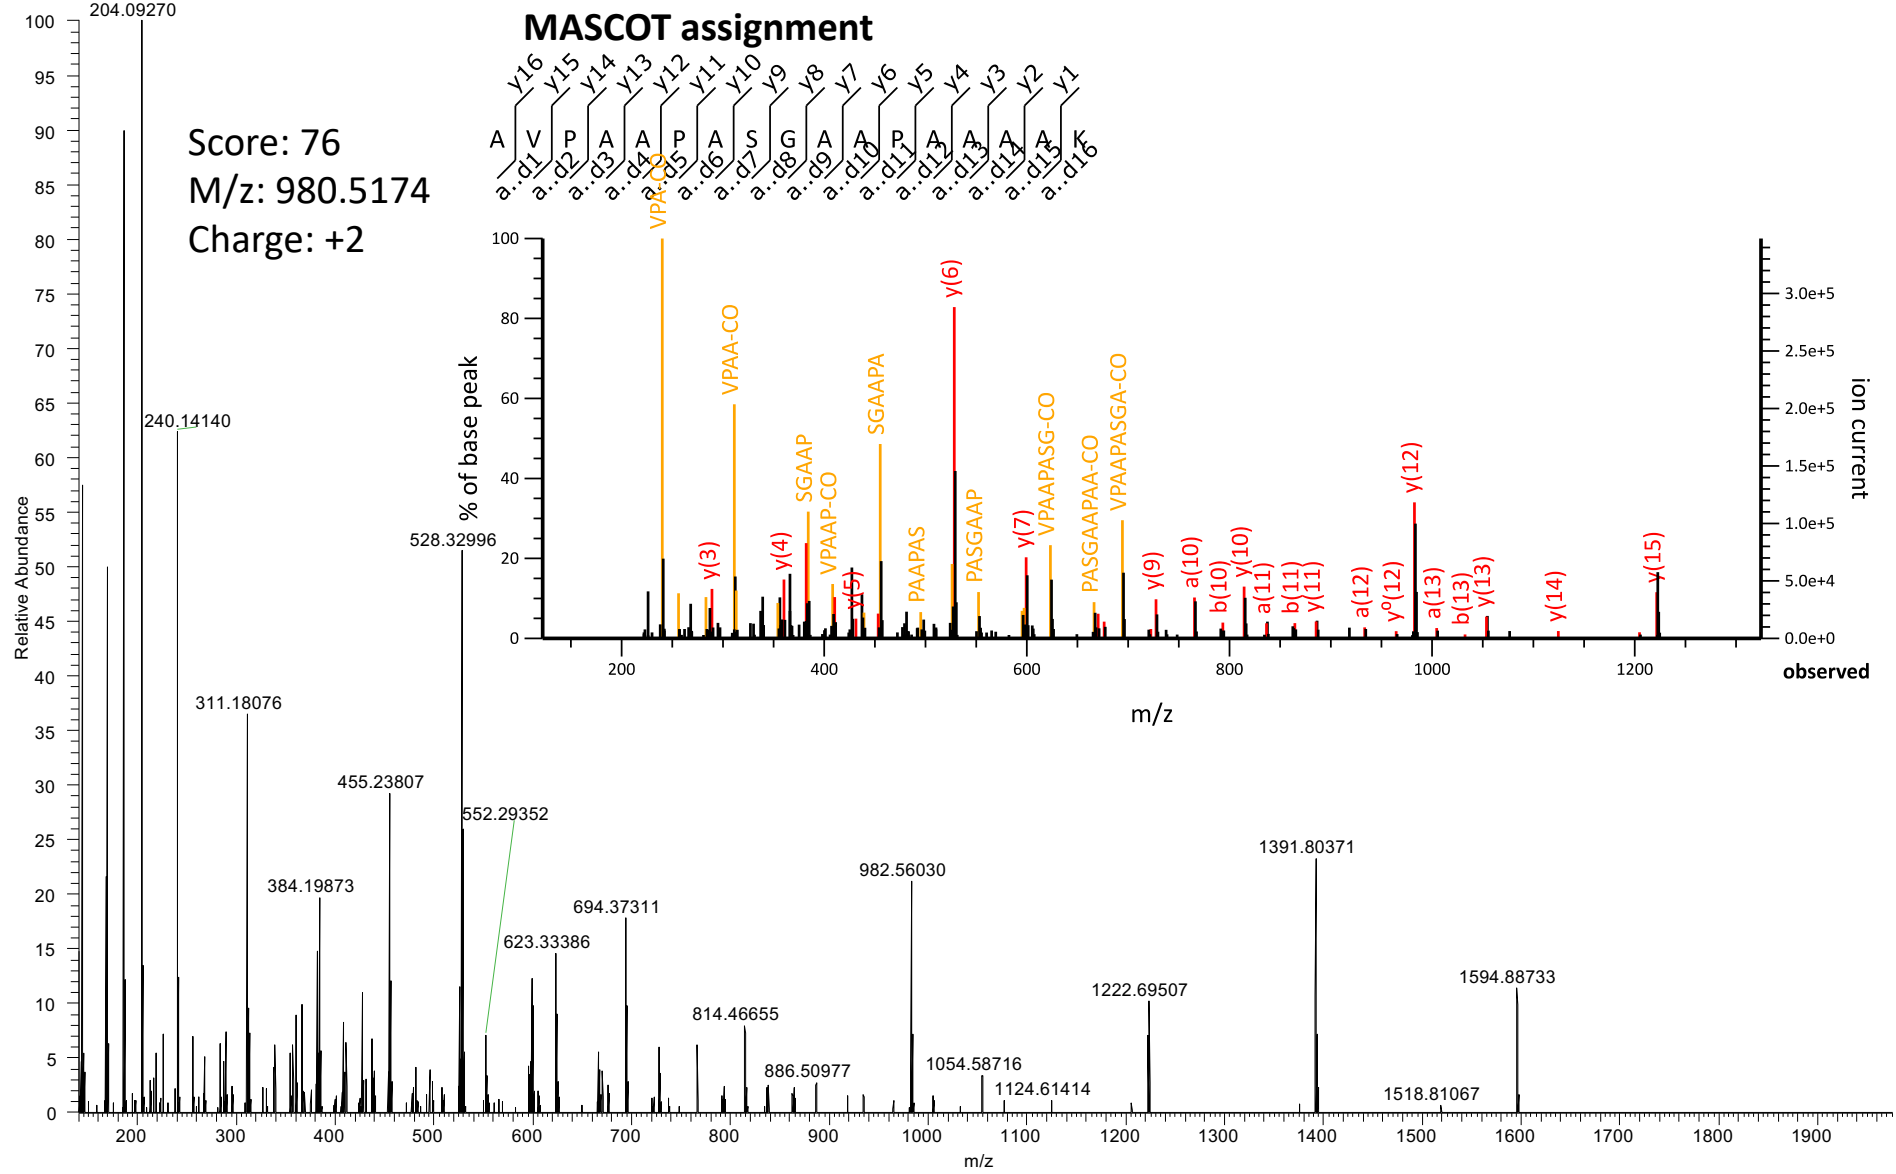

ITMS-CID

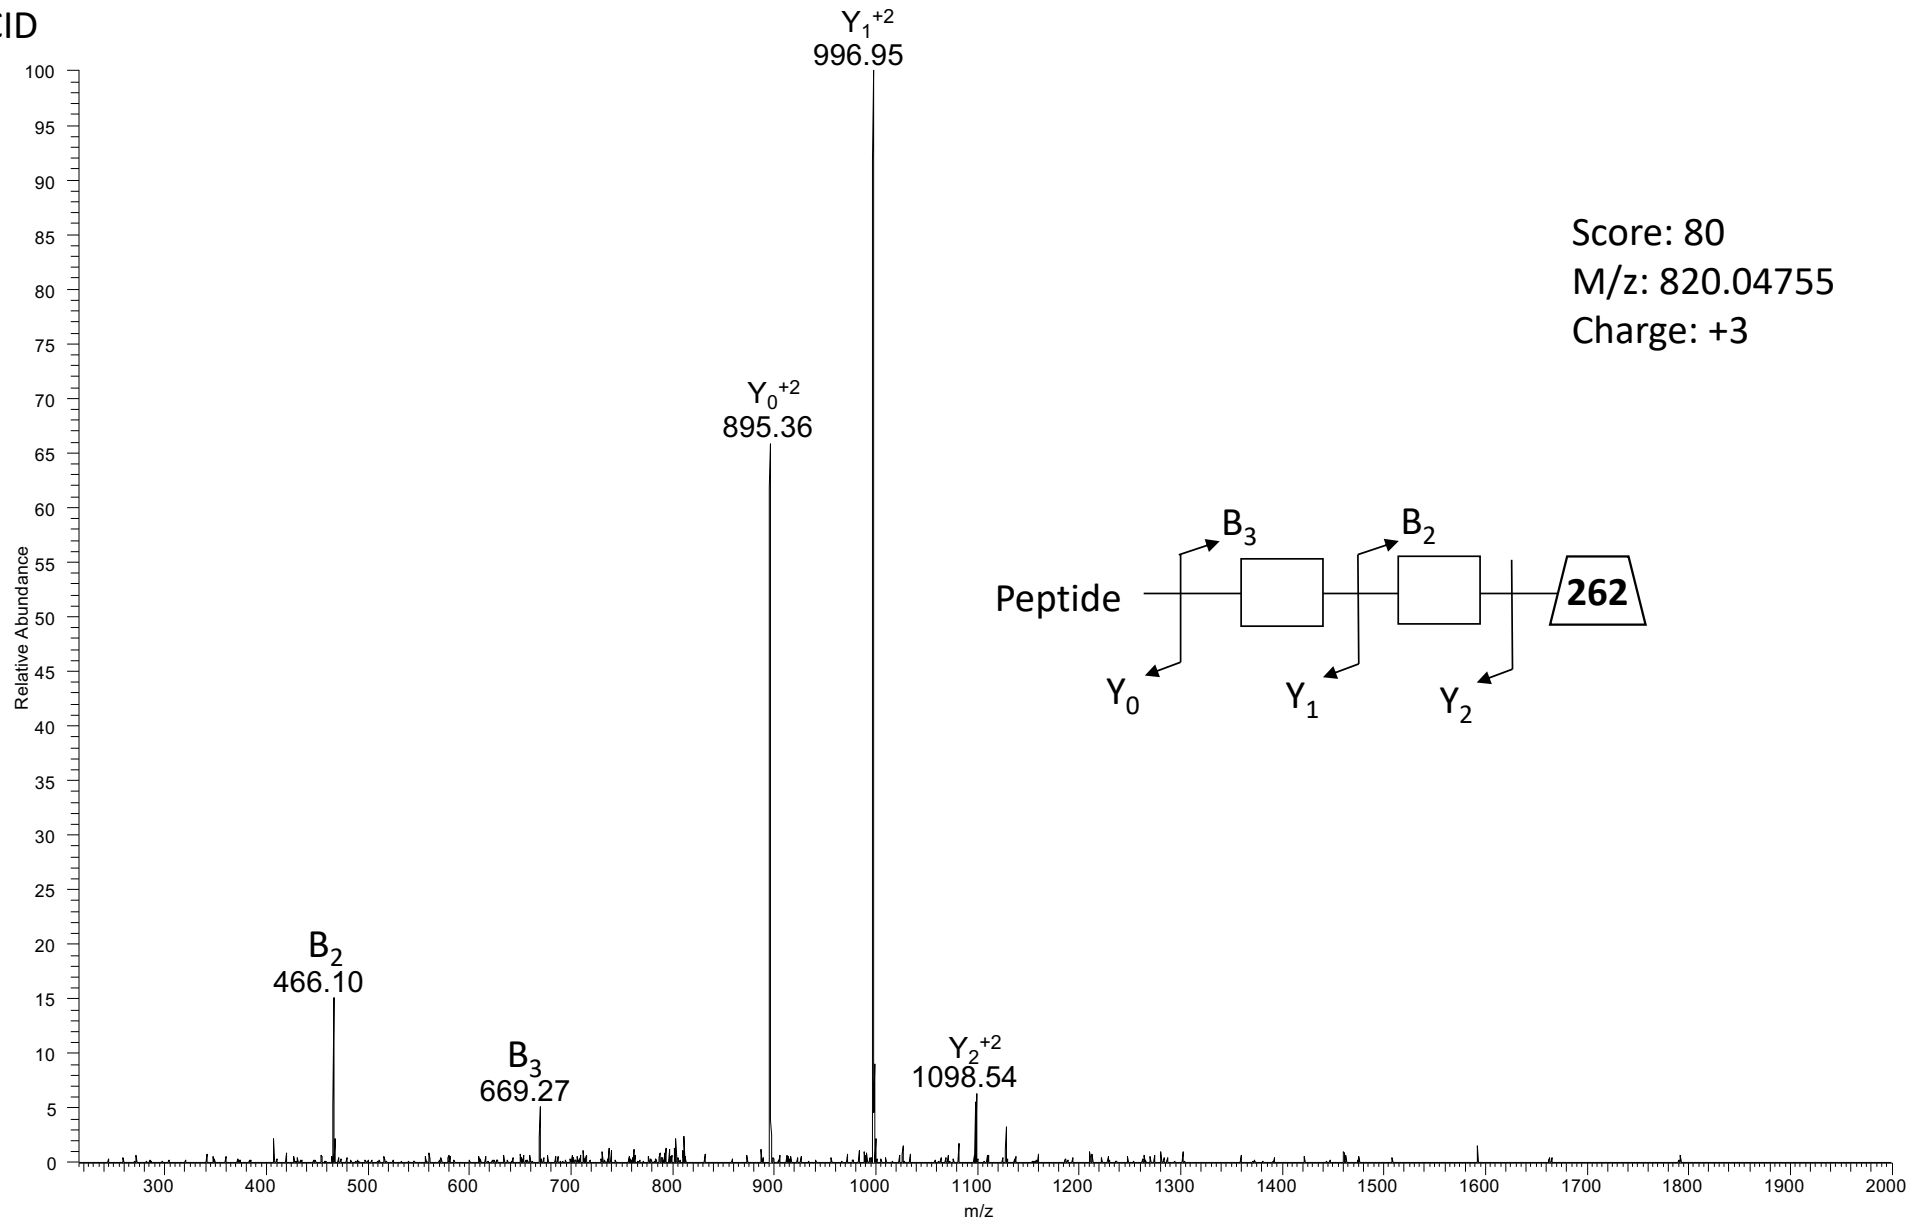

Score: 80

M/z: 820.04755

Charge: +3

FTMS-HCD

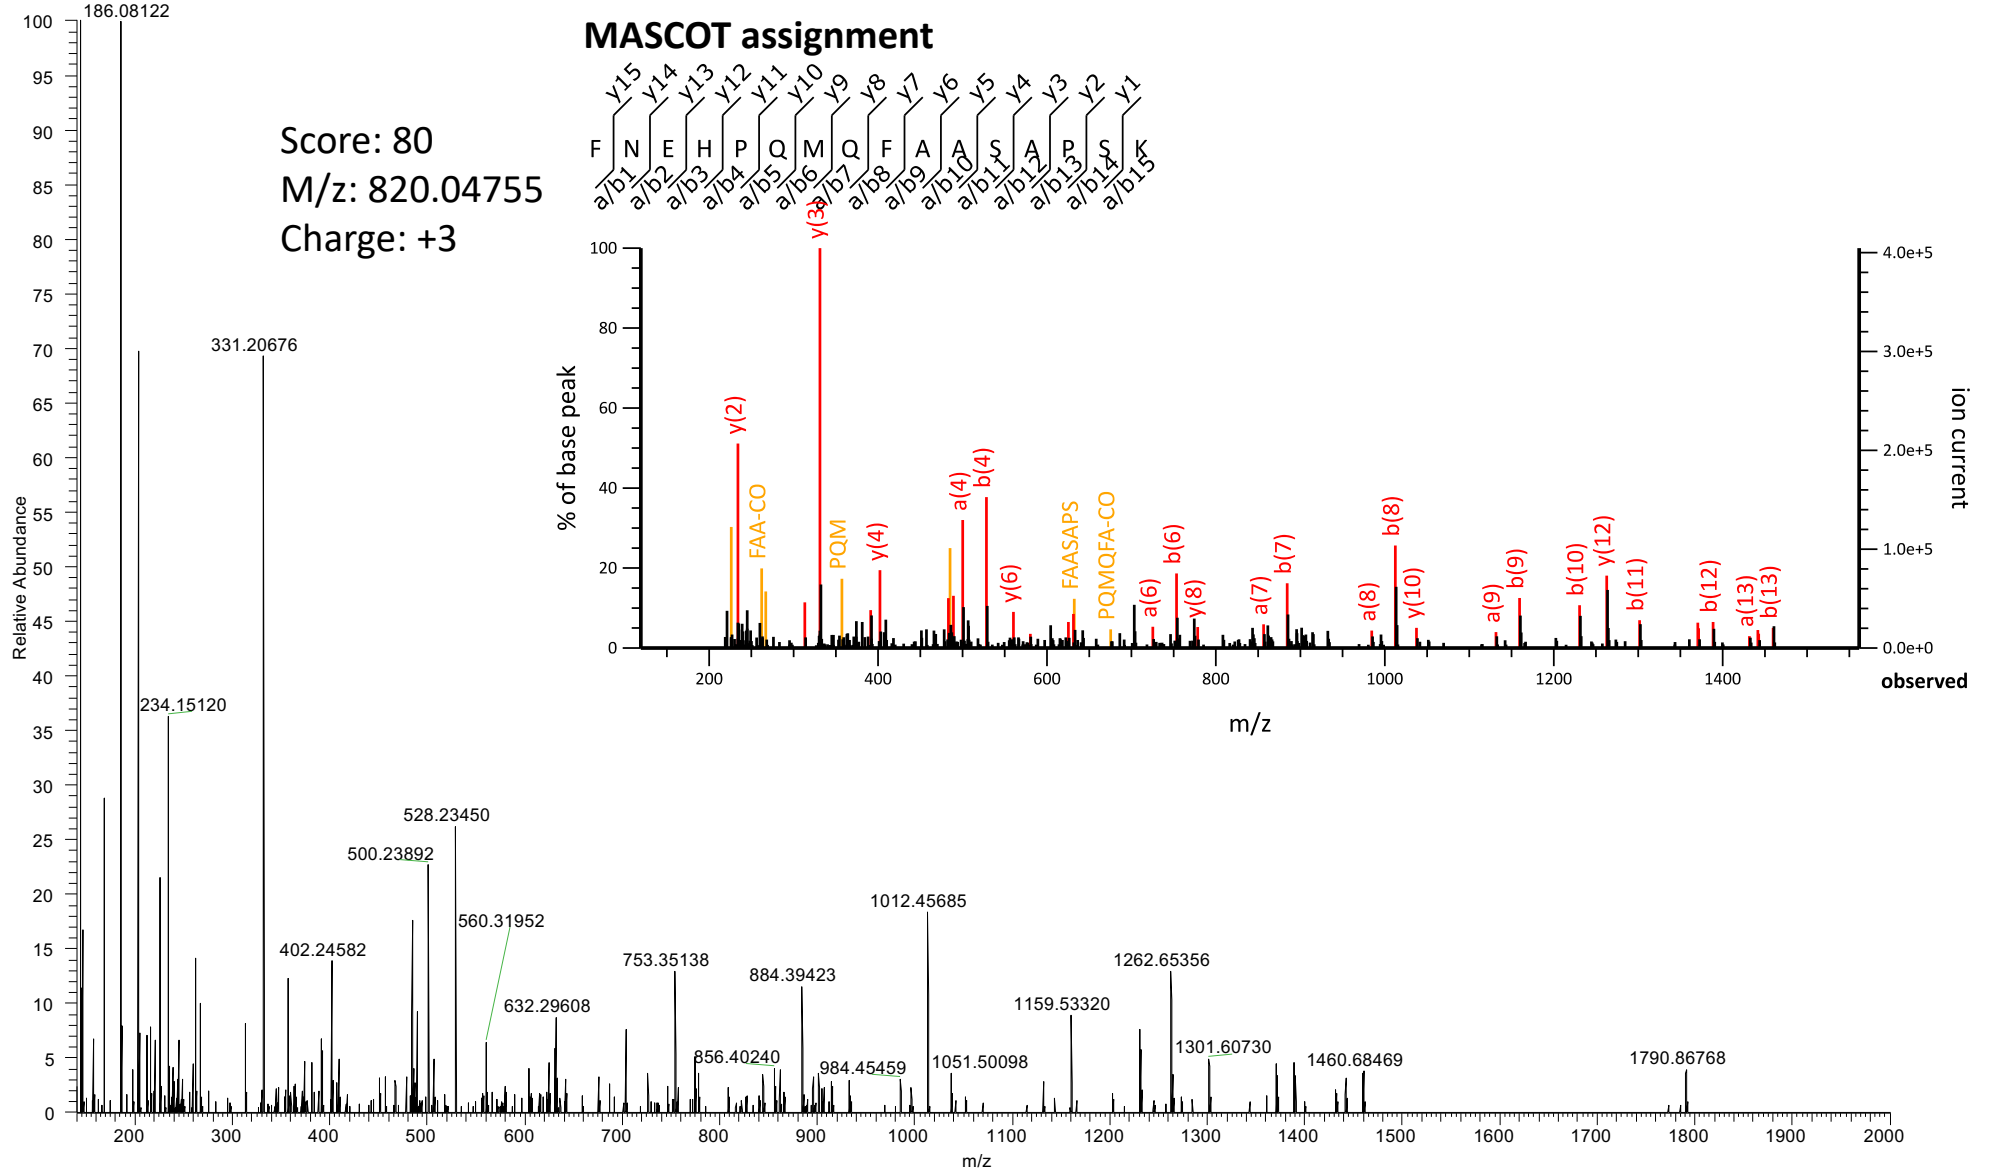

# ITMS-CID

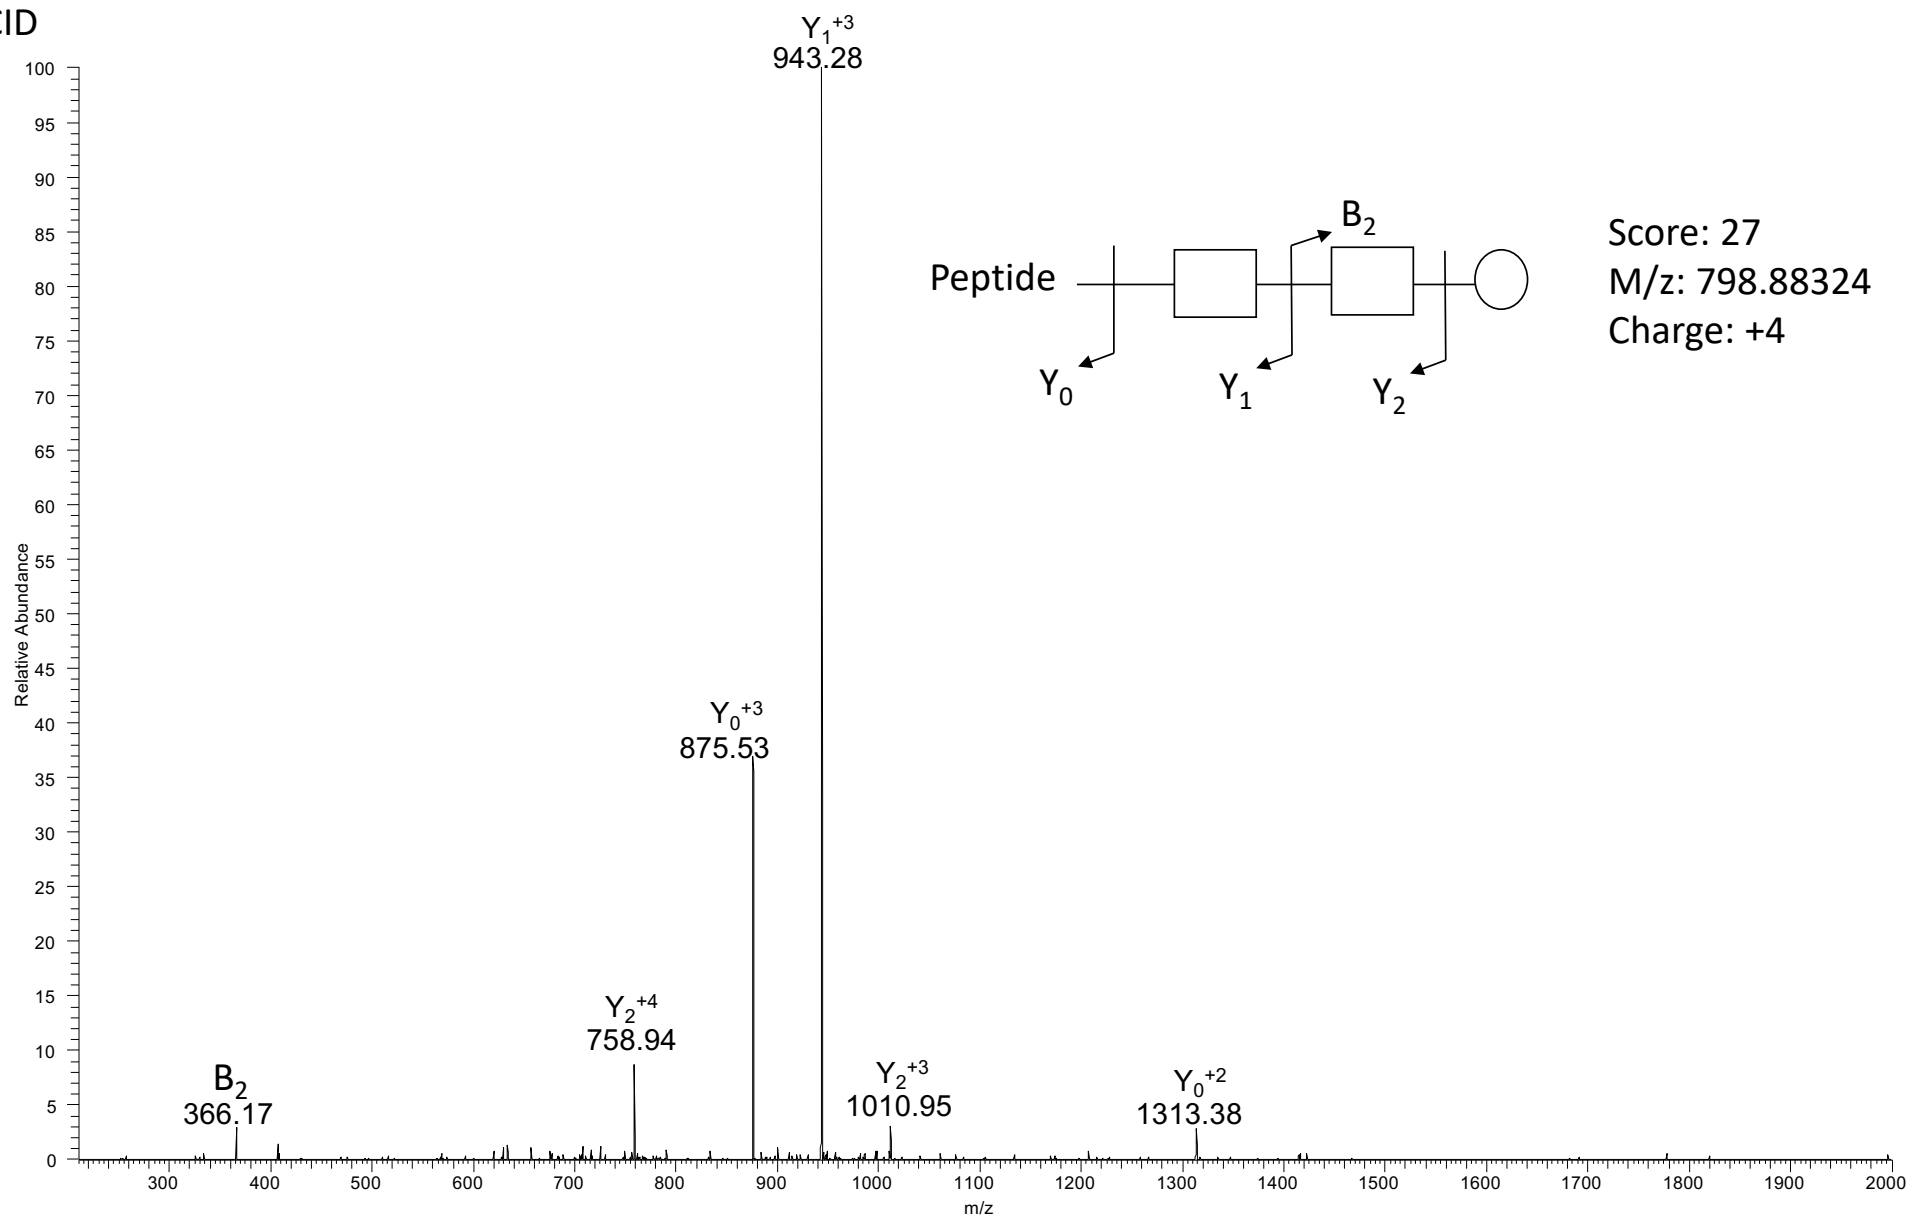

Score: 27

M/z: 798.88324

Charge: +4

FTMS-HCD

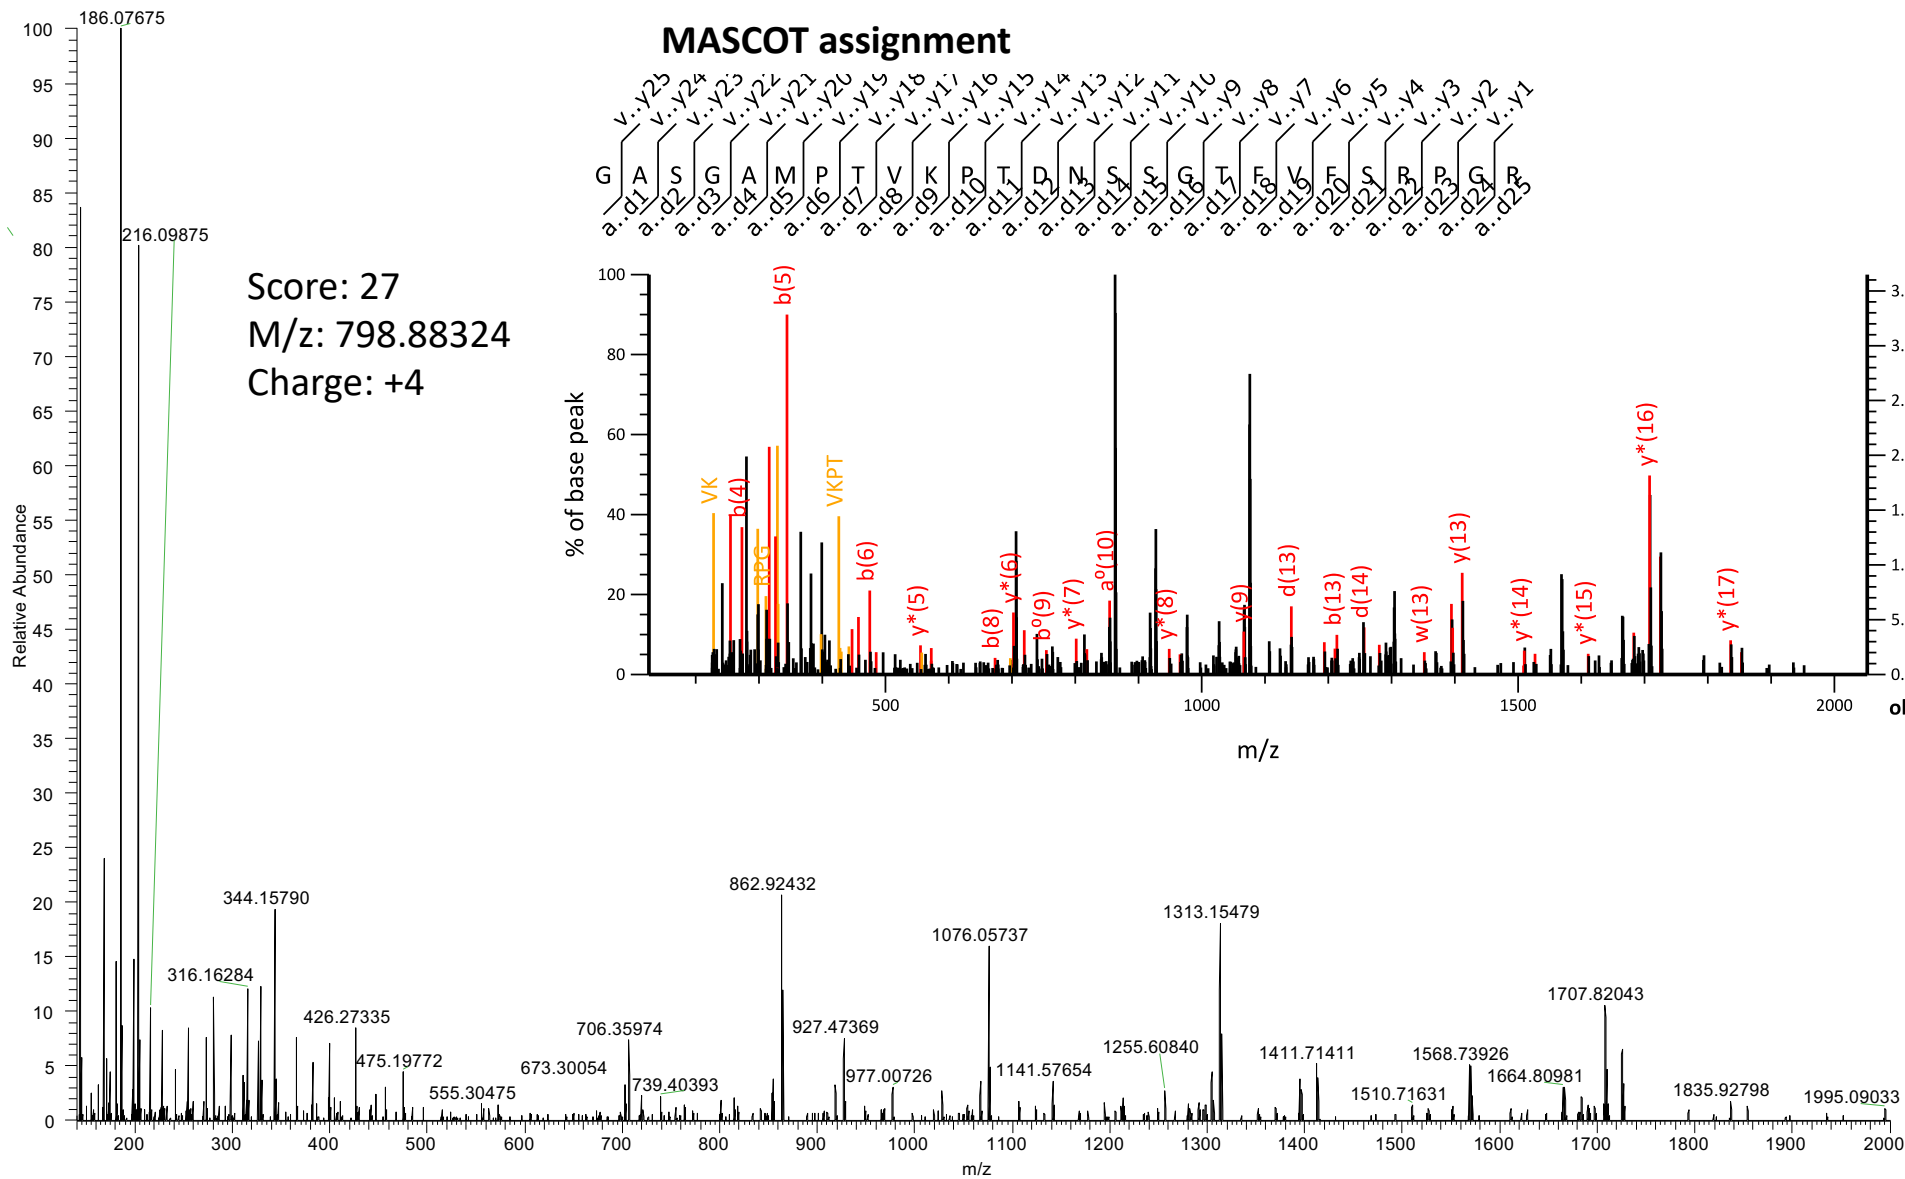

MASCOT assignment

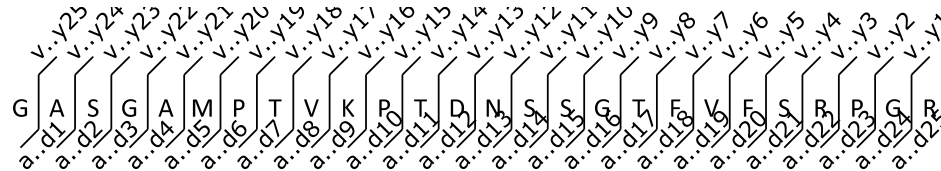

Score: 27  
M/z: 798.88324  
Charge: +4

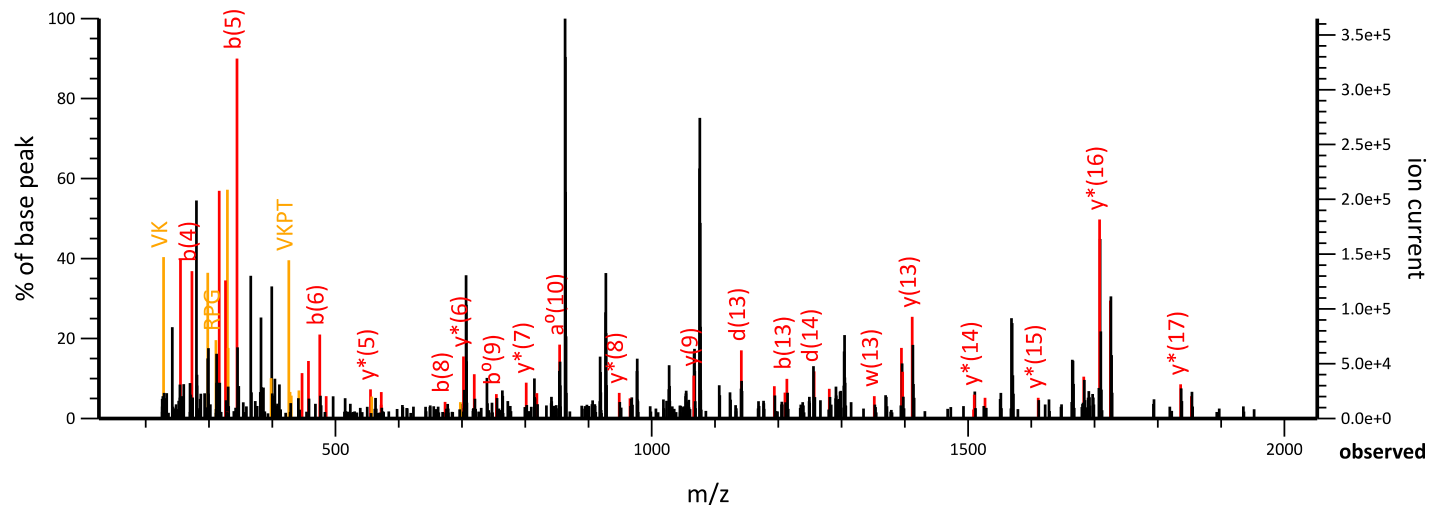

observed

ion current



ITMS-CID

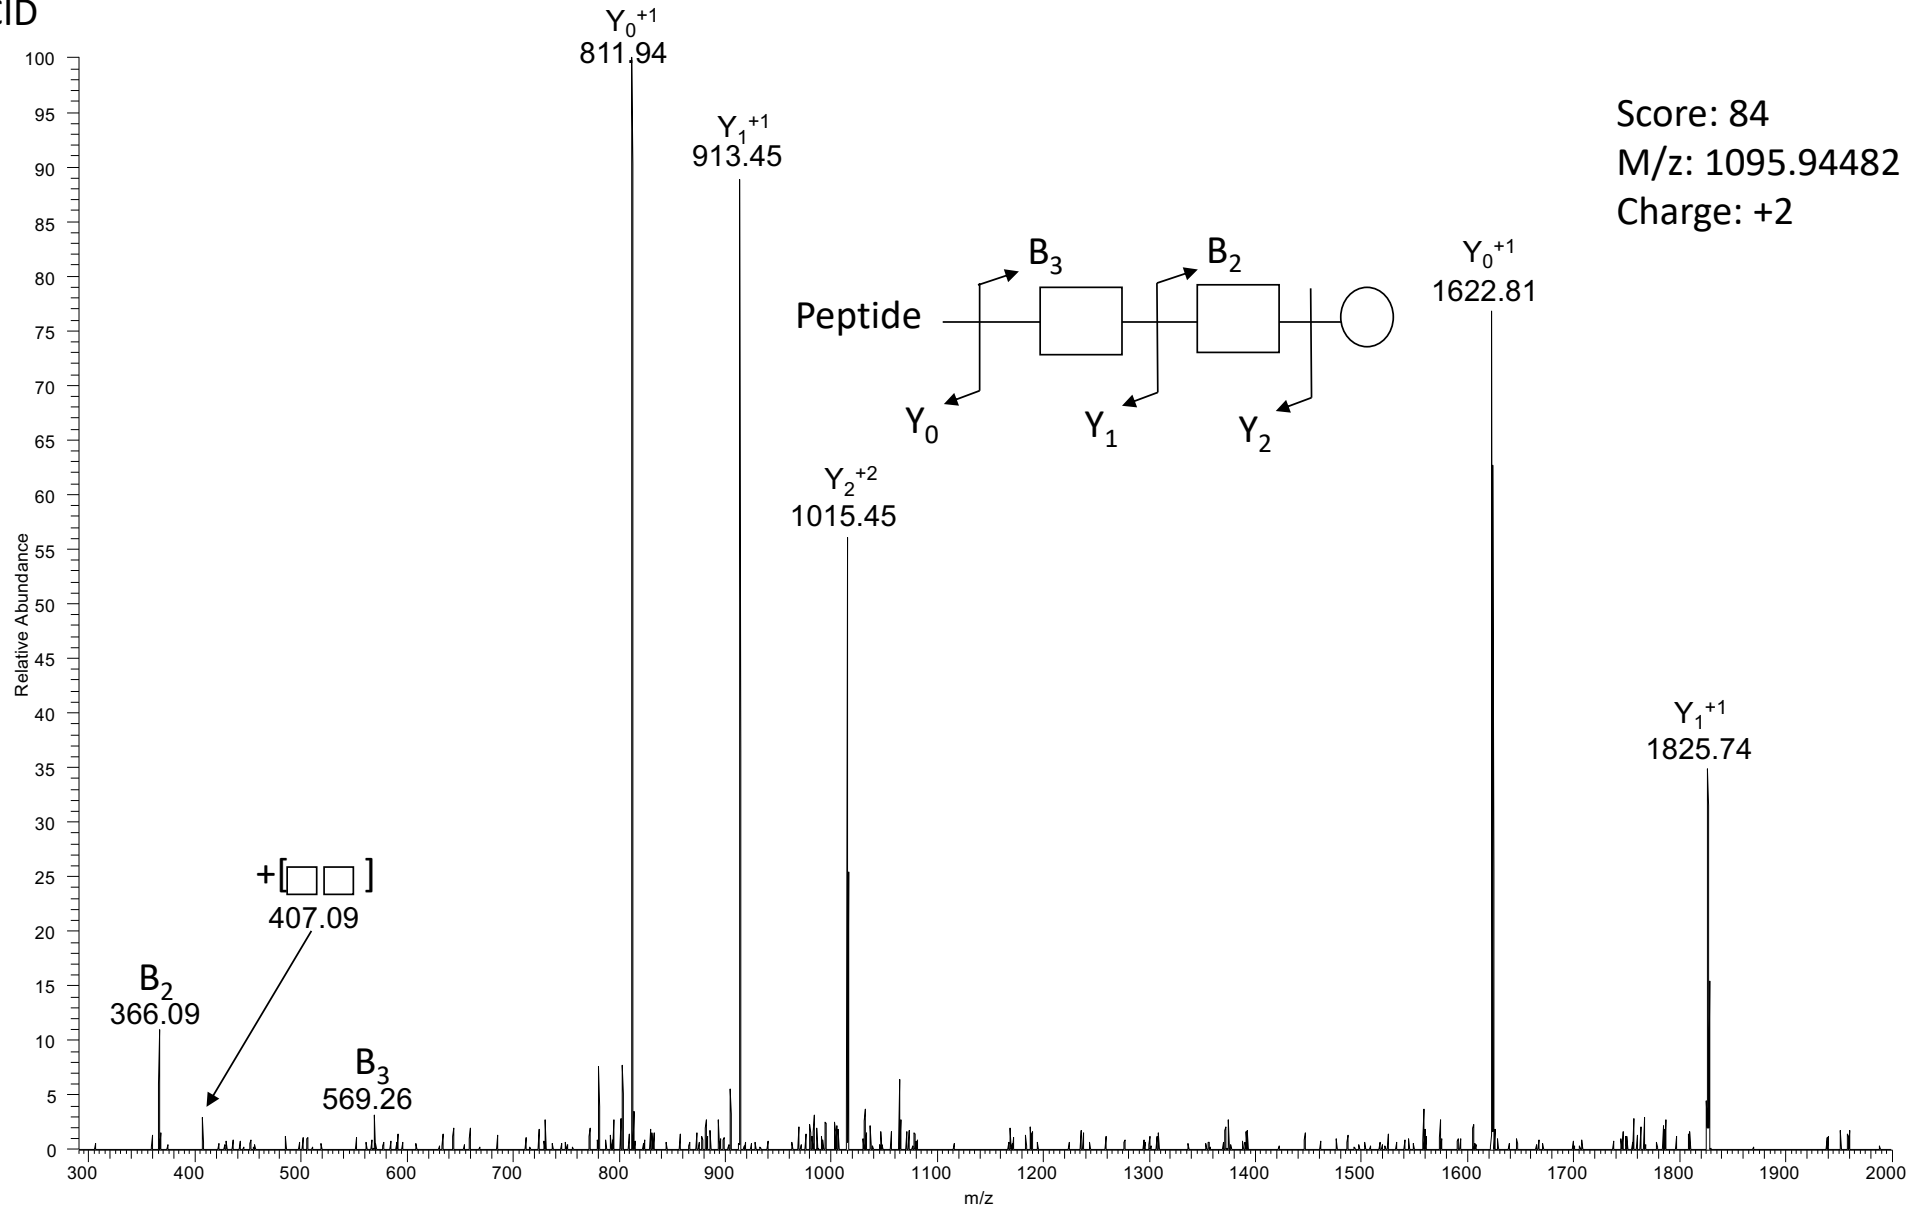

Score: 84  
M/z: 1095.94482  
Charge: +2

FTMS-HCD

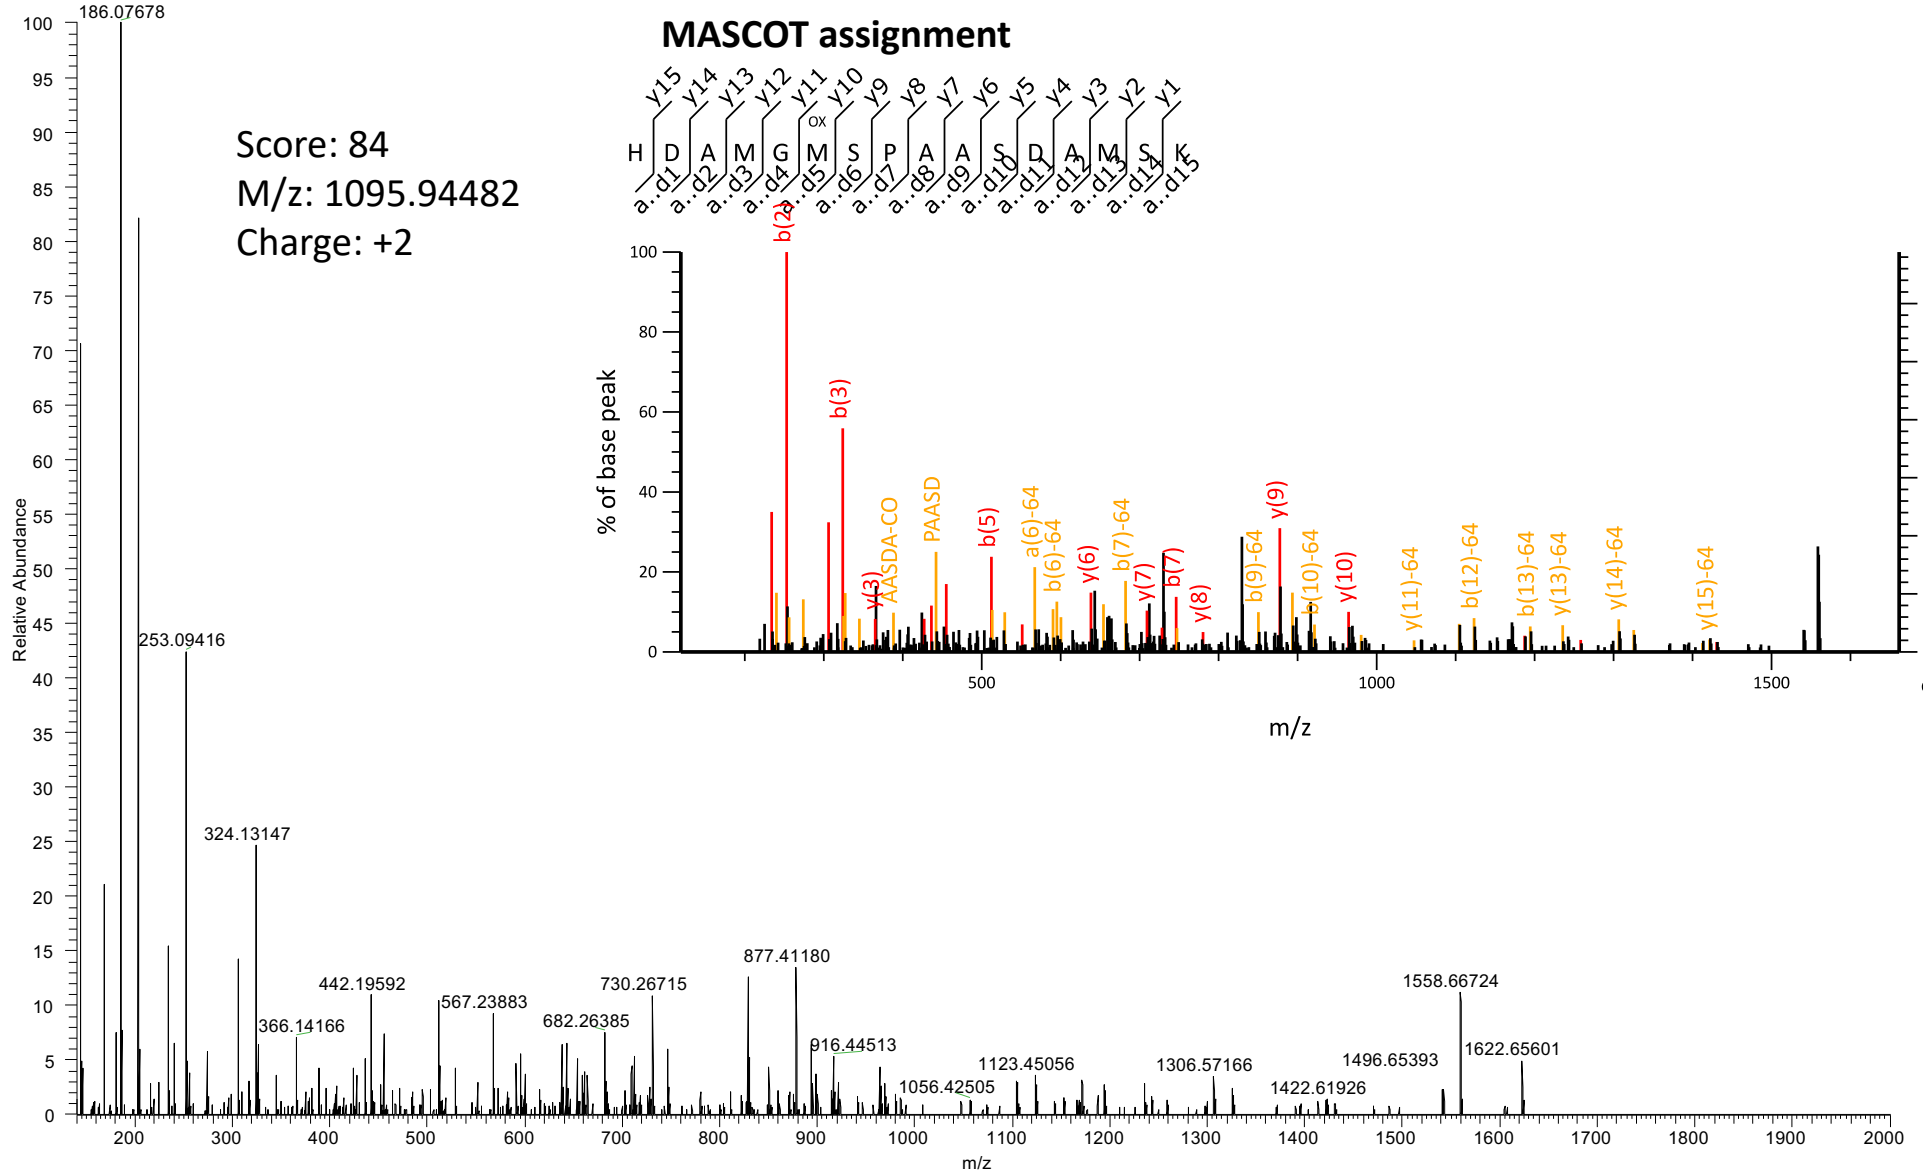

MASCOT assignment

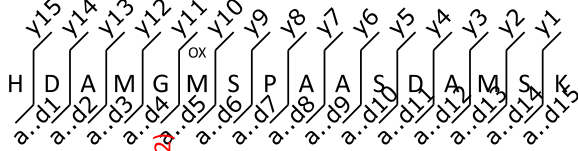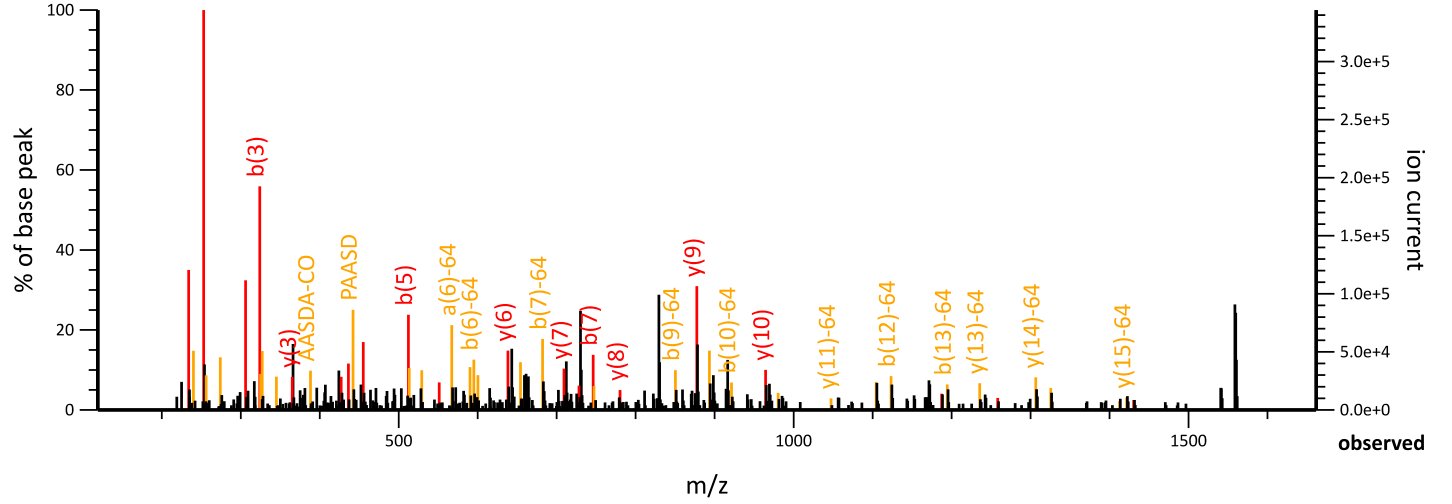

# ITMS-CID

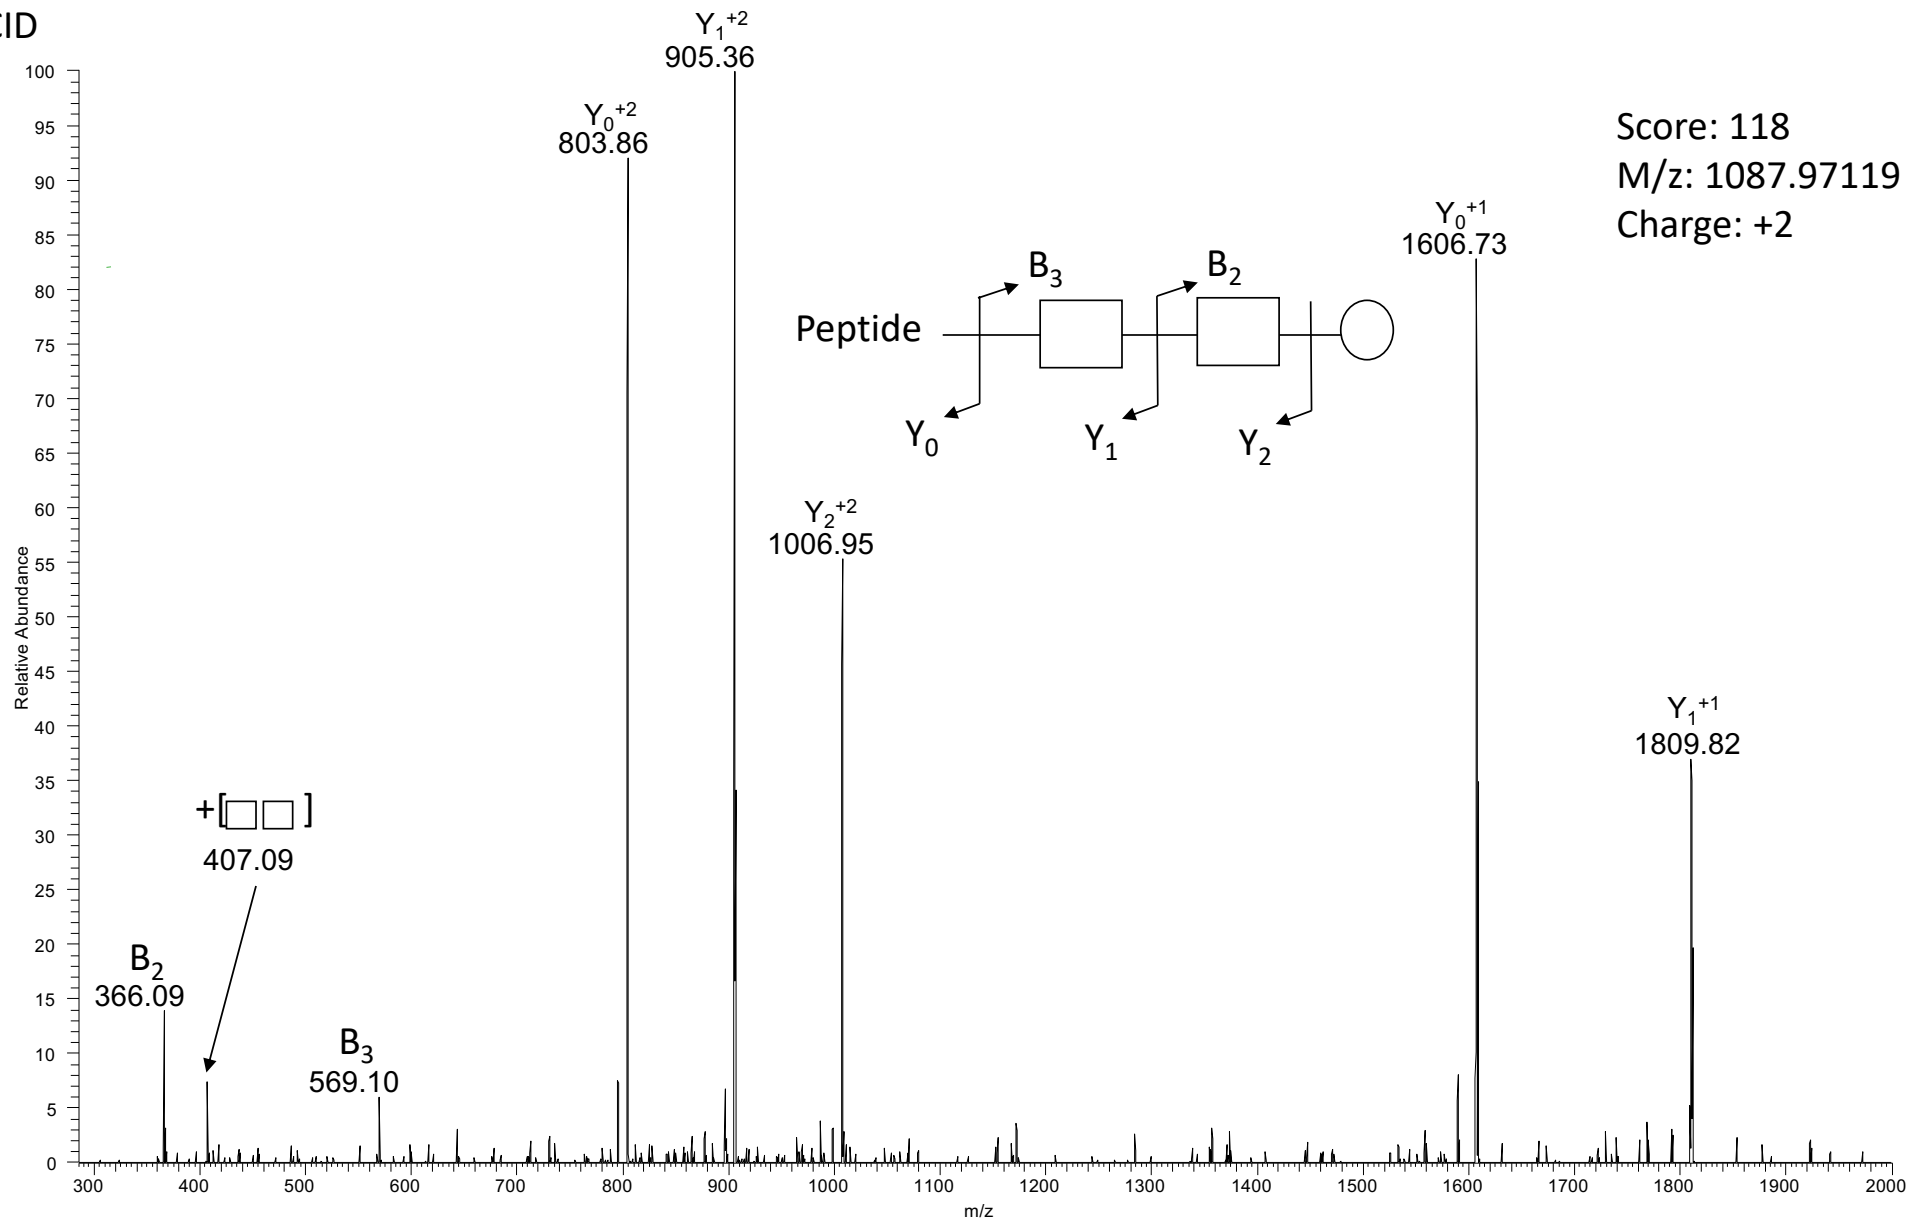

Score: 118  
M/z: 1087.97119  
Charge: +2

FTMS-HCD

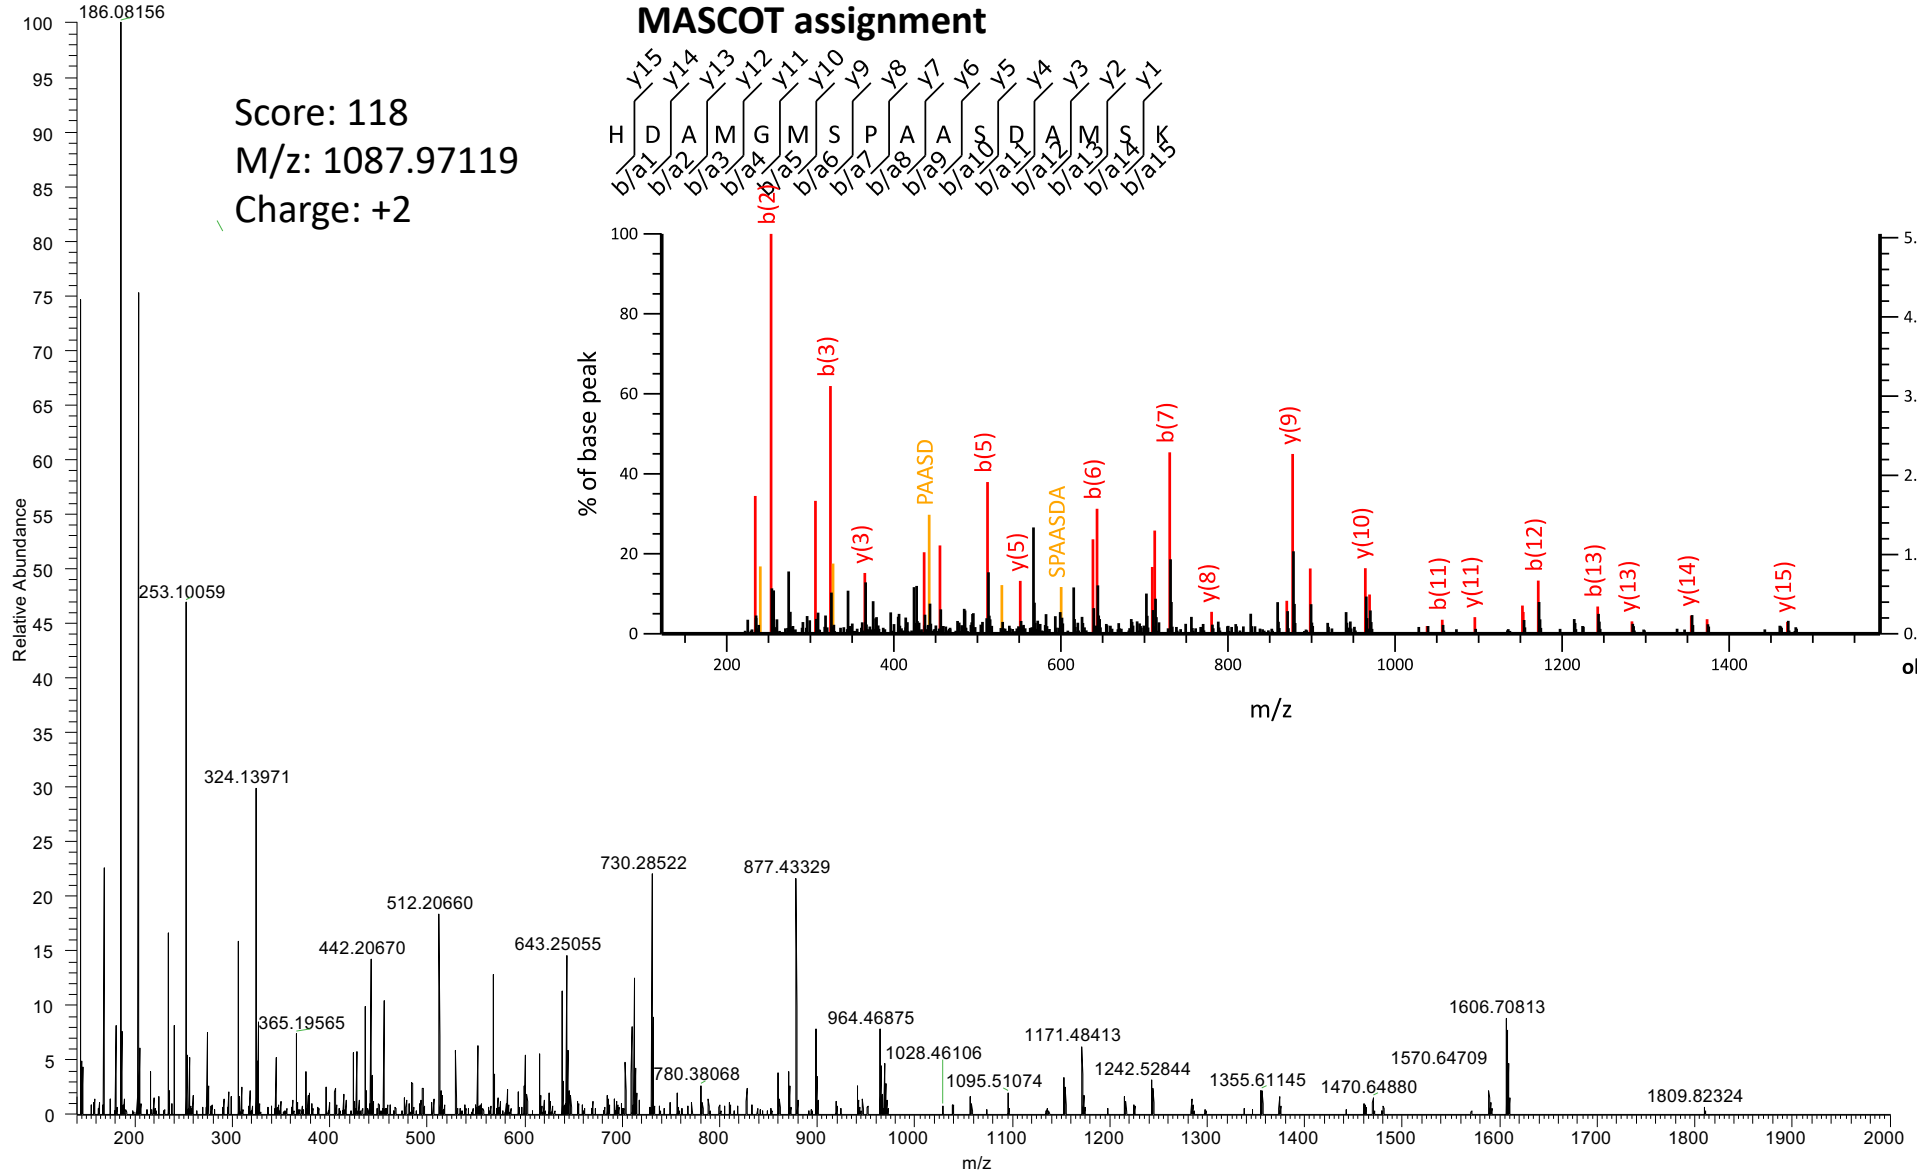

Score: 118  
M/z: 1087.97119  
Charge: +2

MASCOT assignment

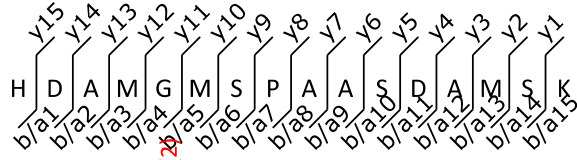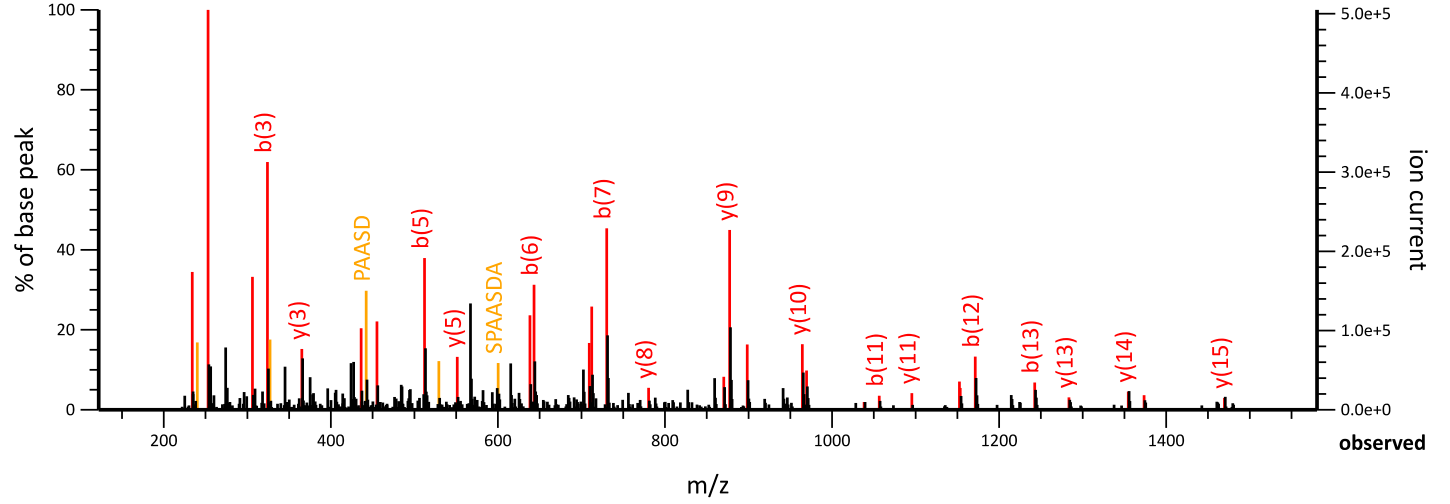

# ITMS-CID

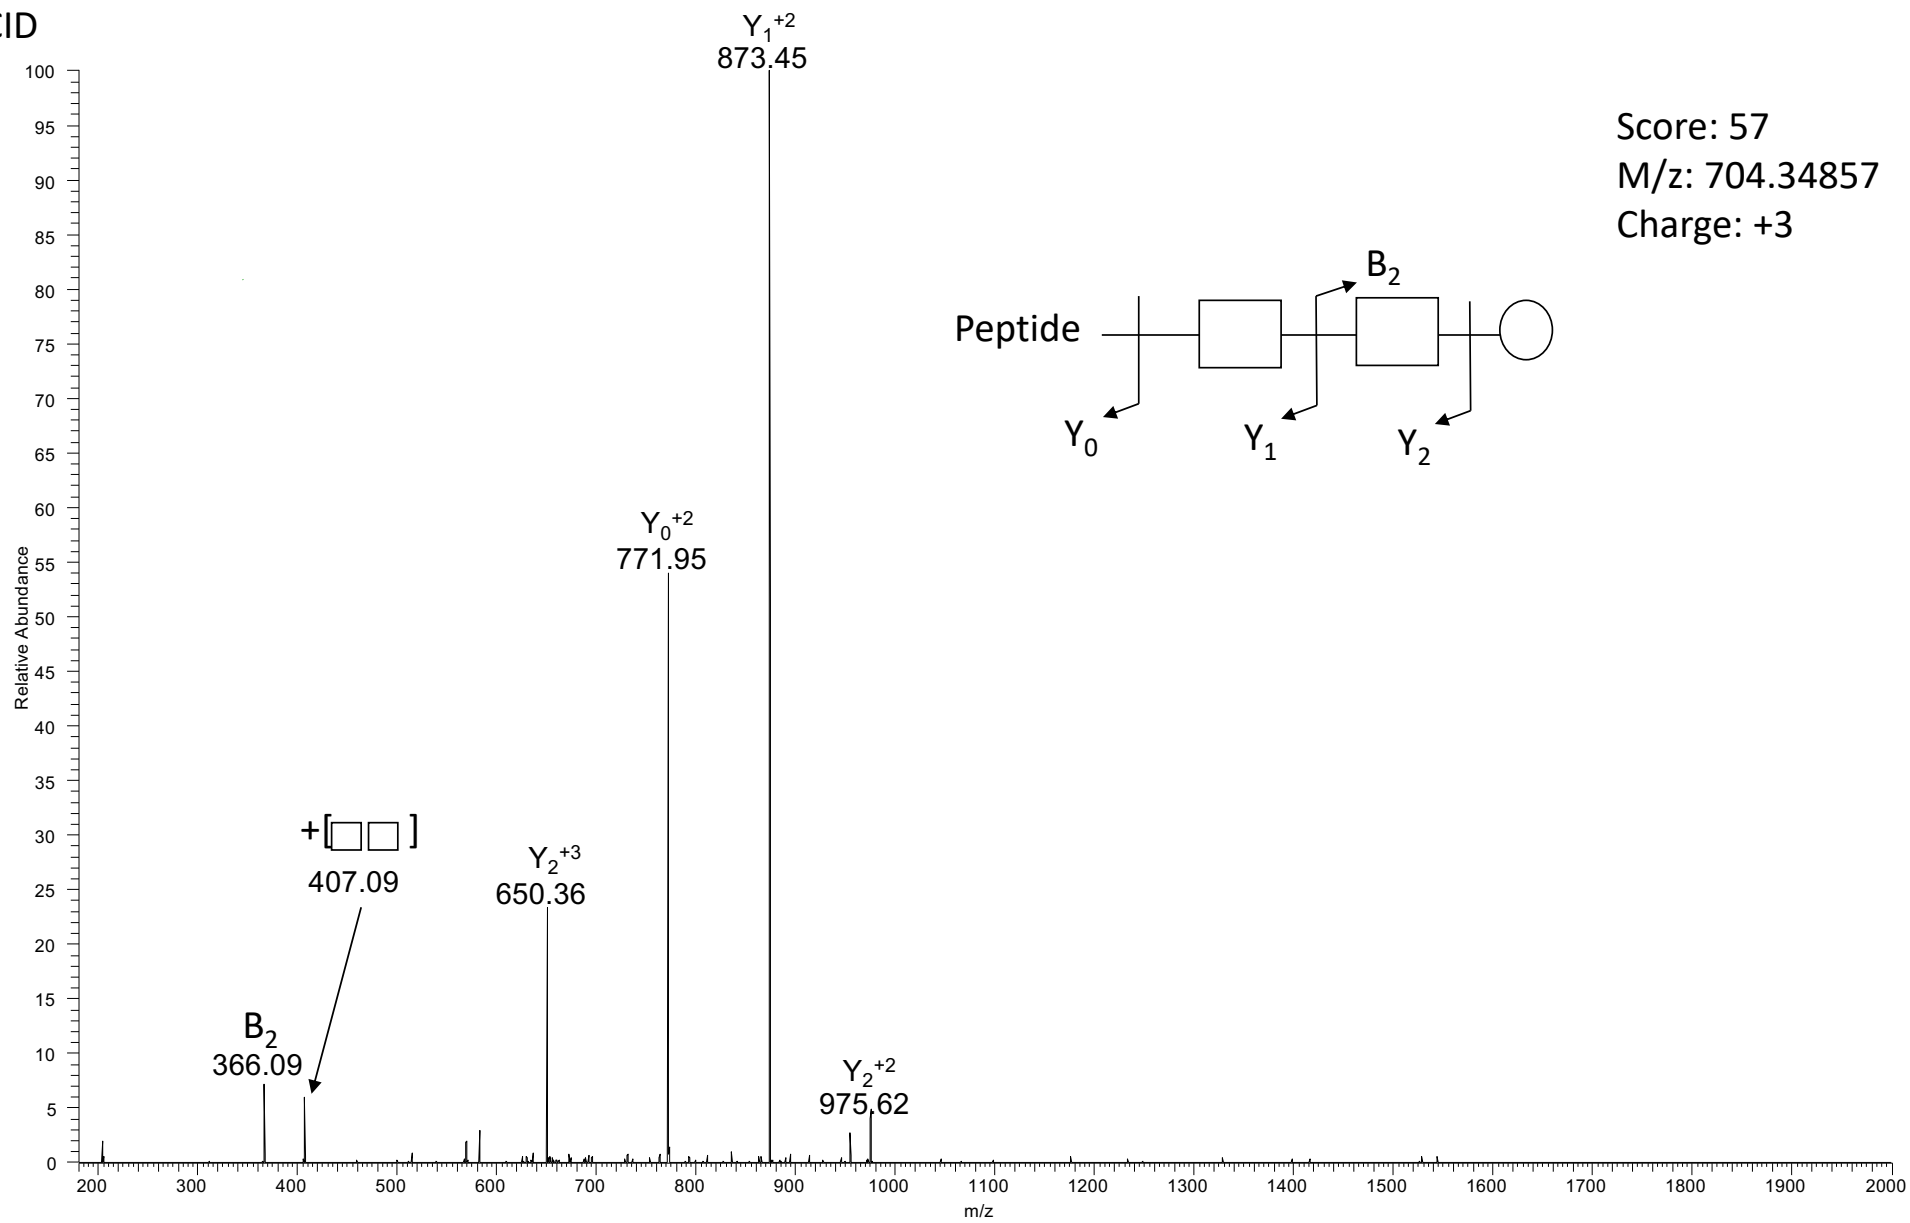

Score: 57  
M/z: 704.34857  
Charge: +3

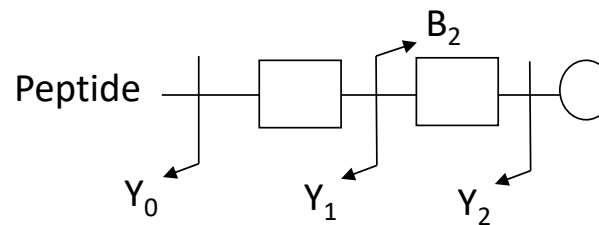

FTMS-HCD

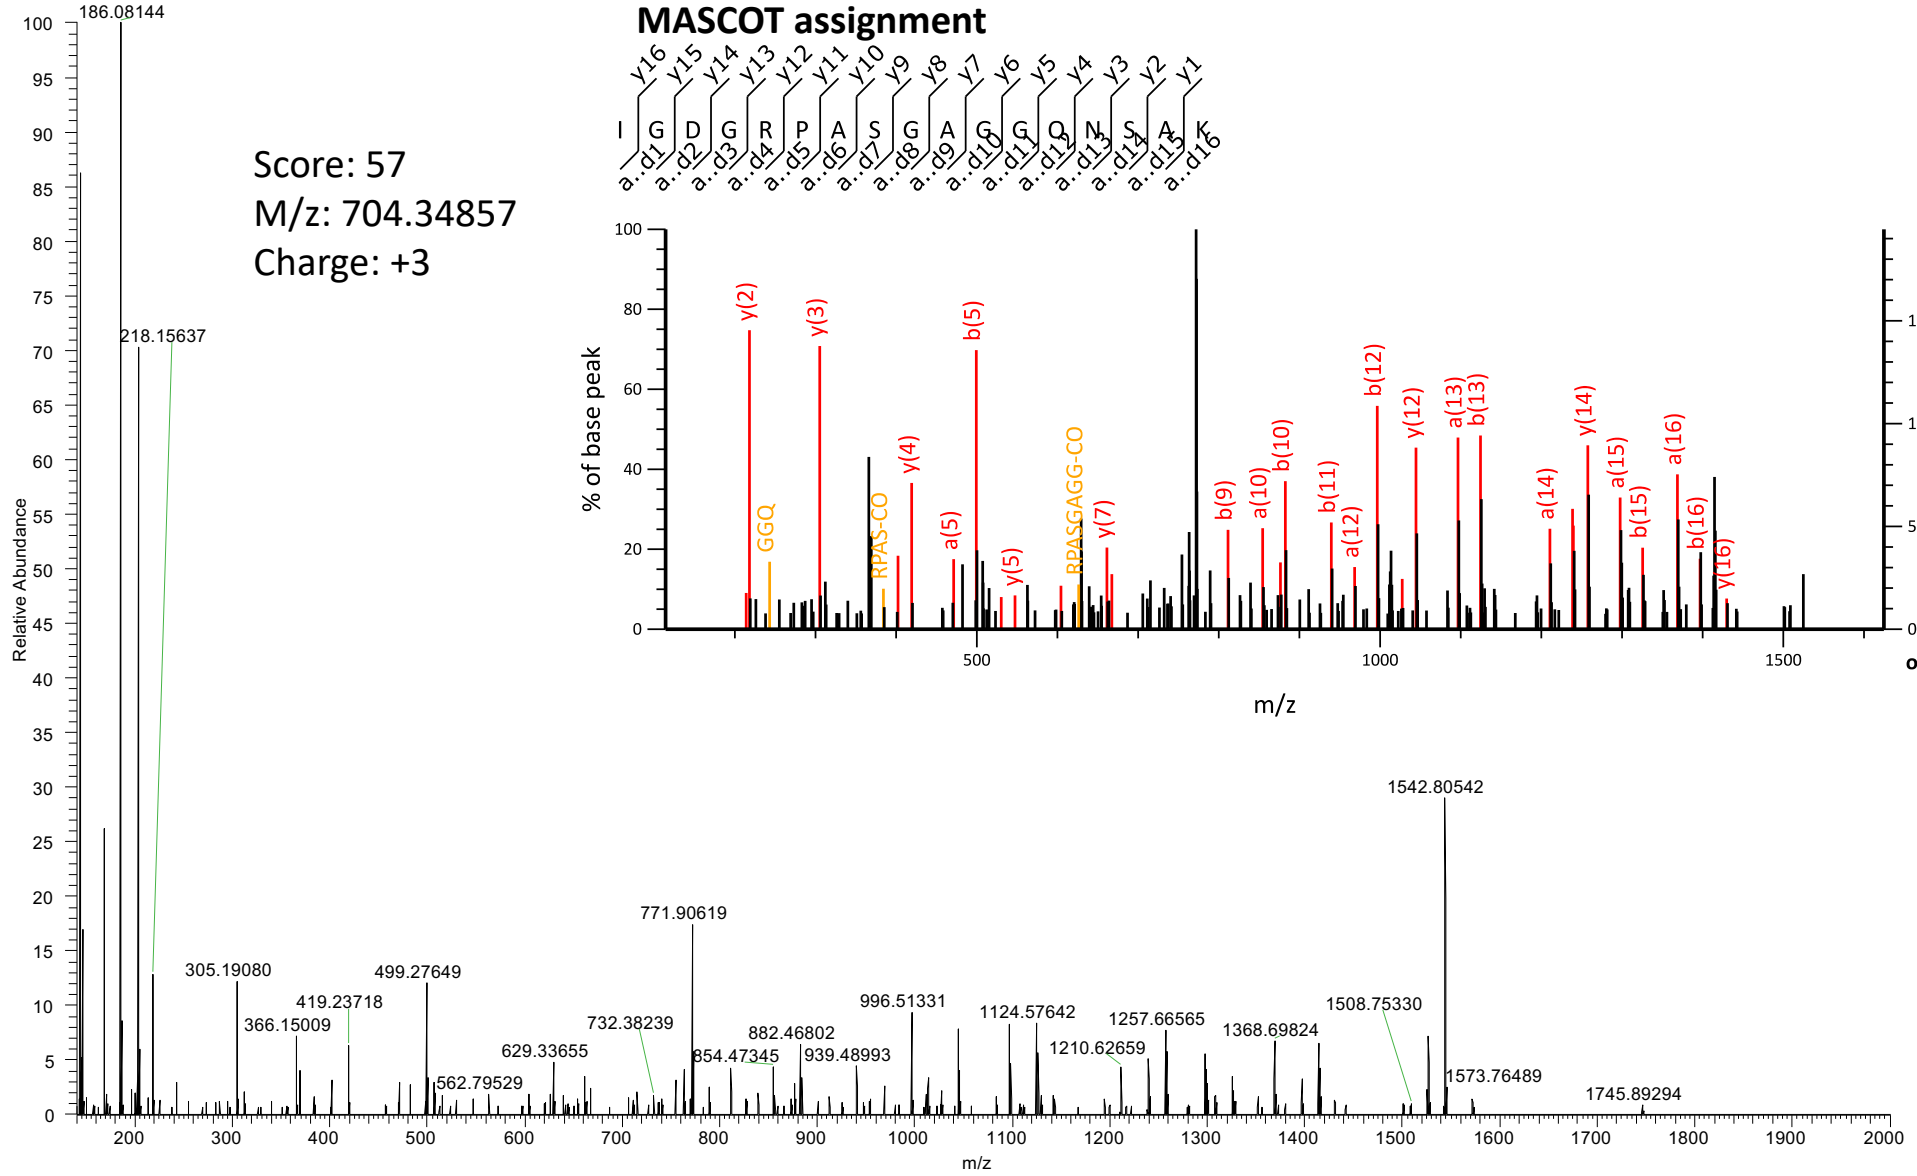

MASCOT assignment

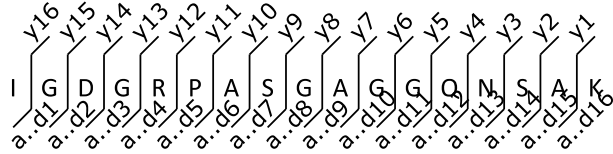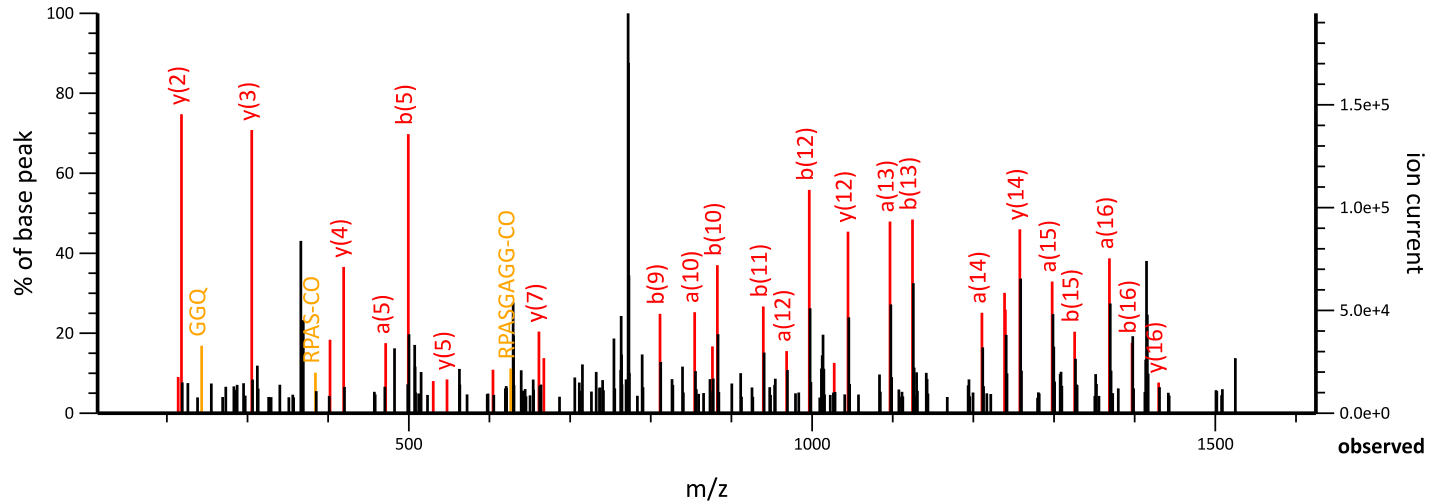

# ITMS-CID

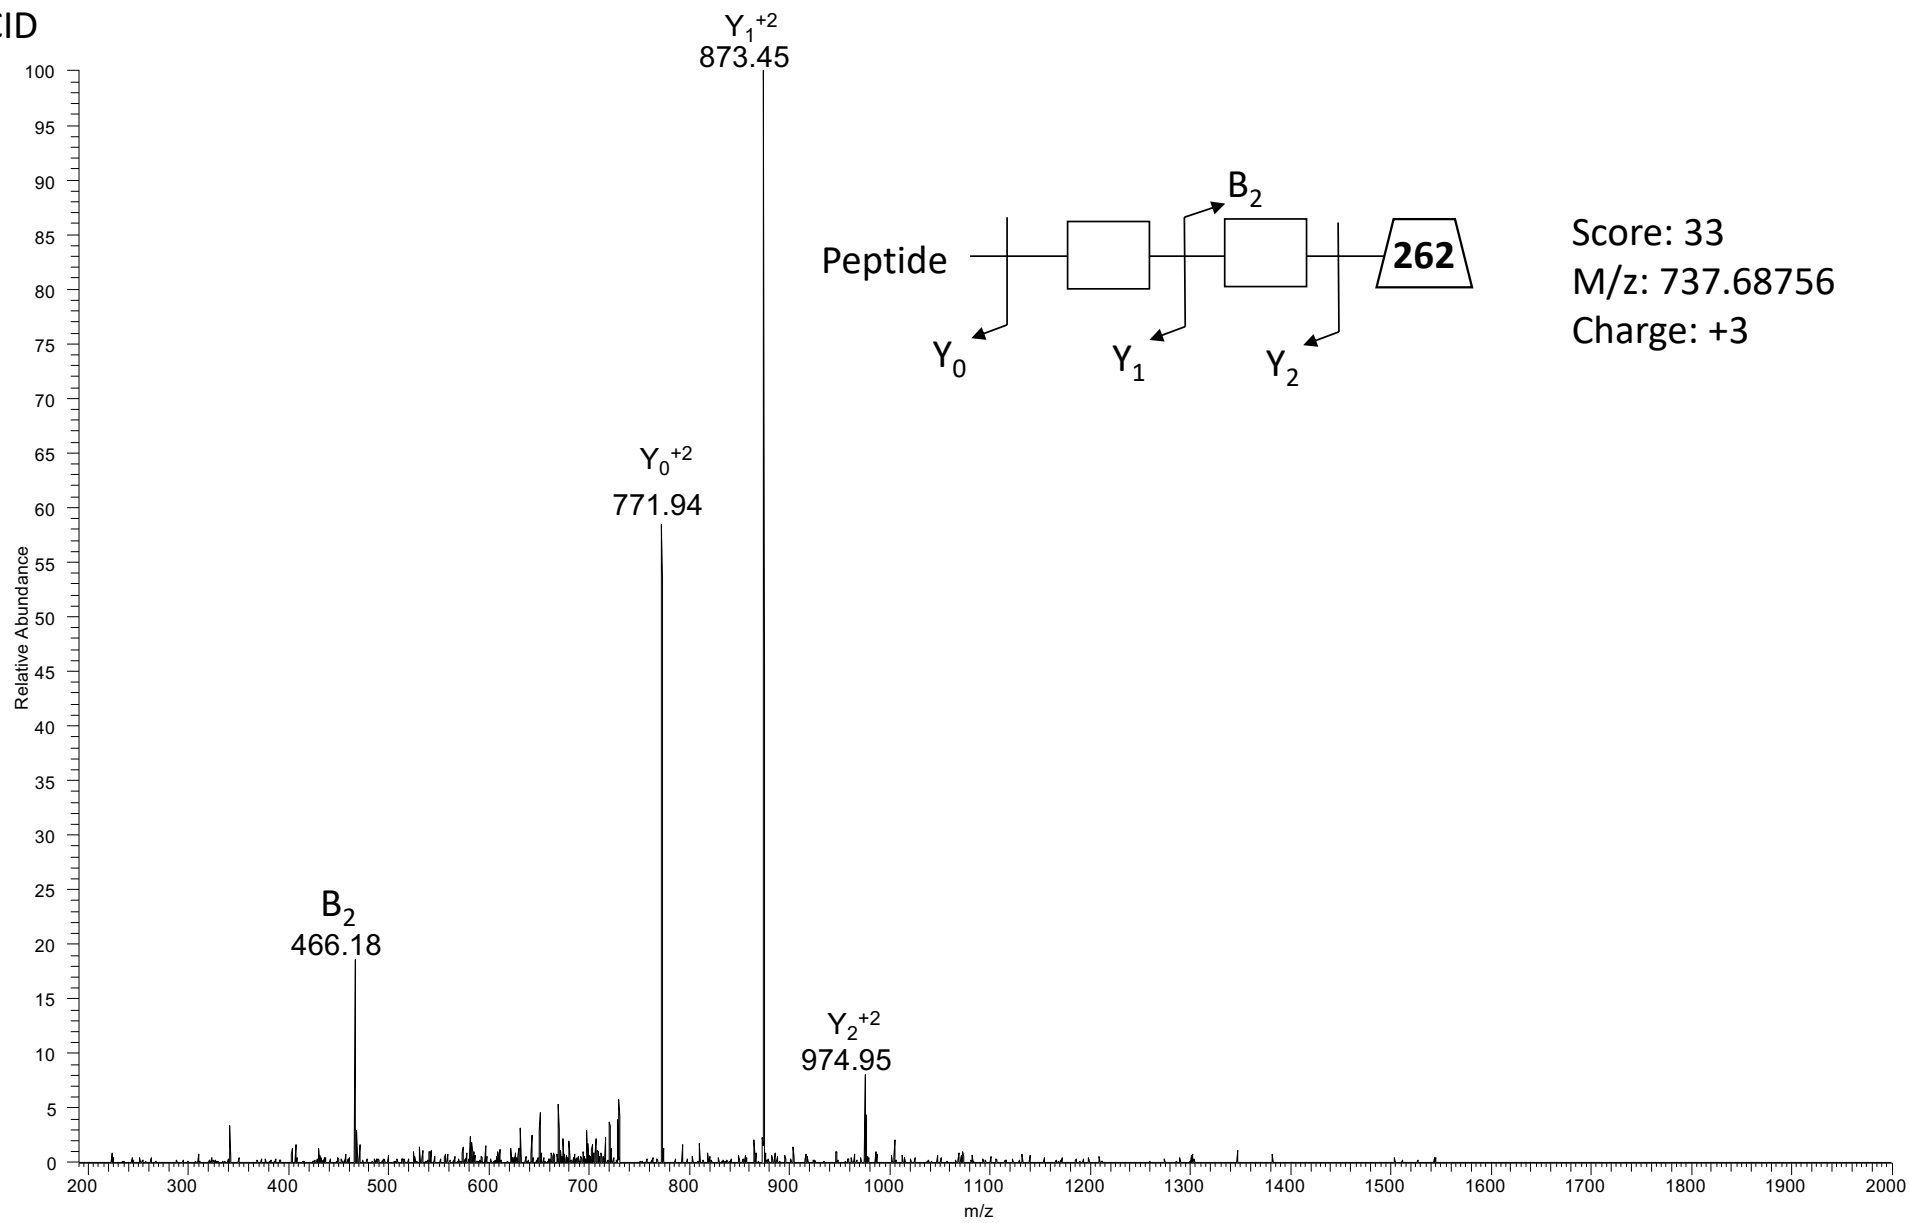

FTMS-HCD

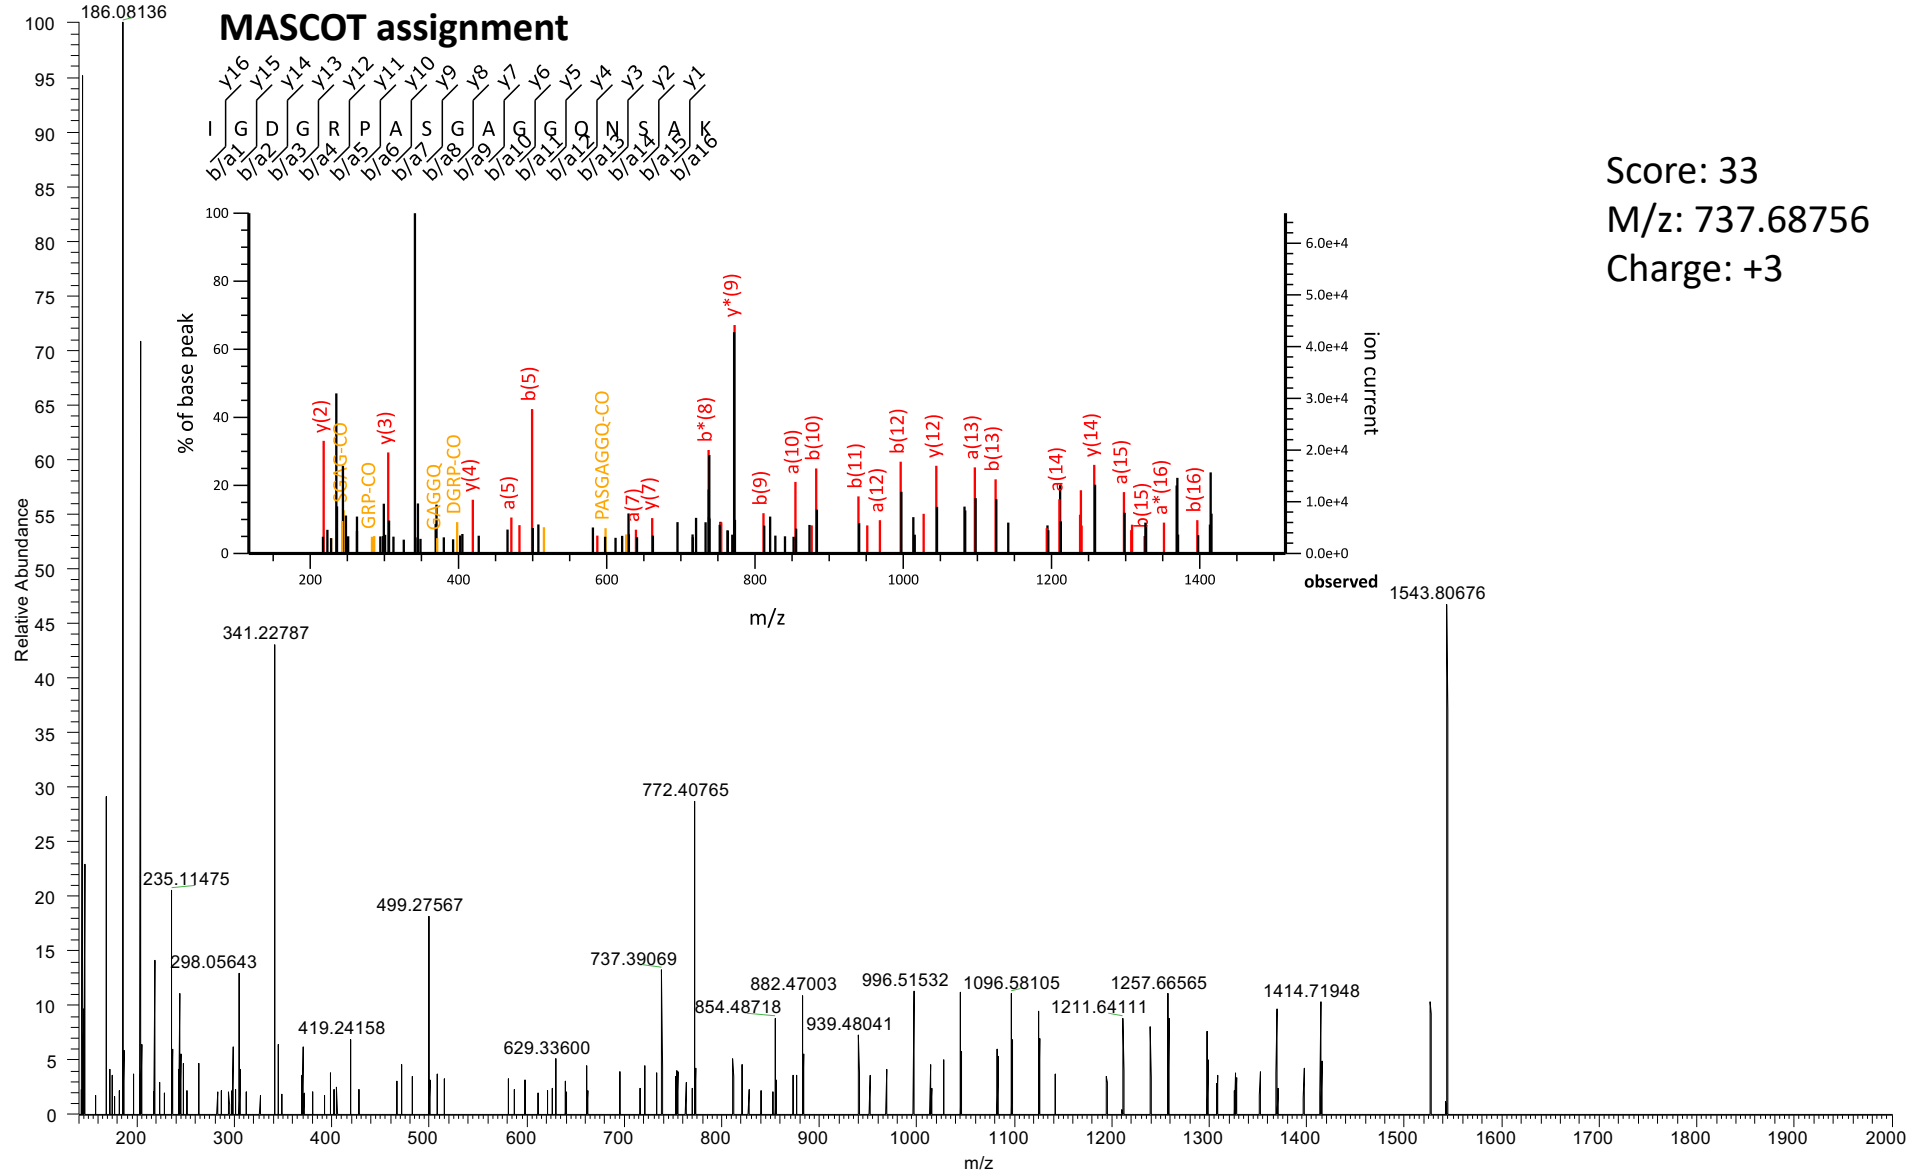



ITMS-CID

Score: 52  
M/z: 779.01428  
Charge: +3

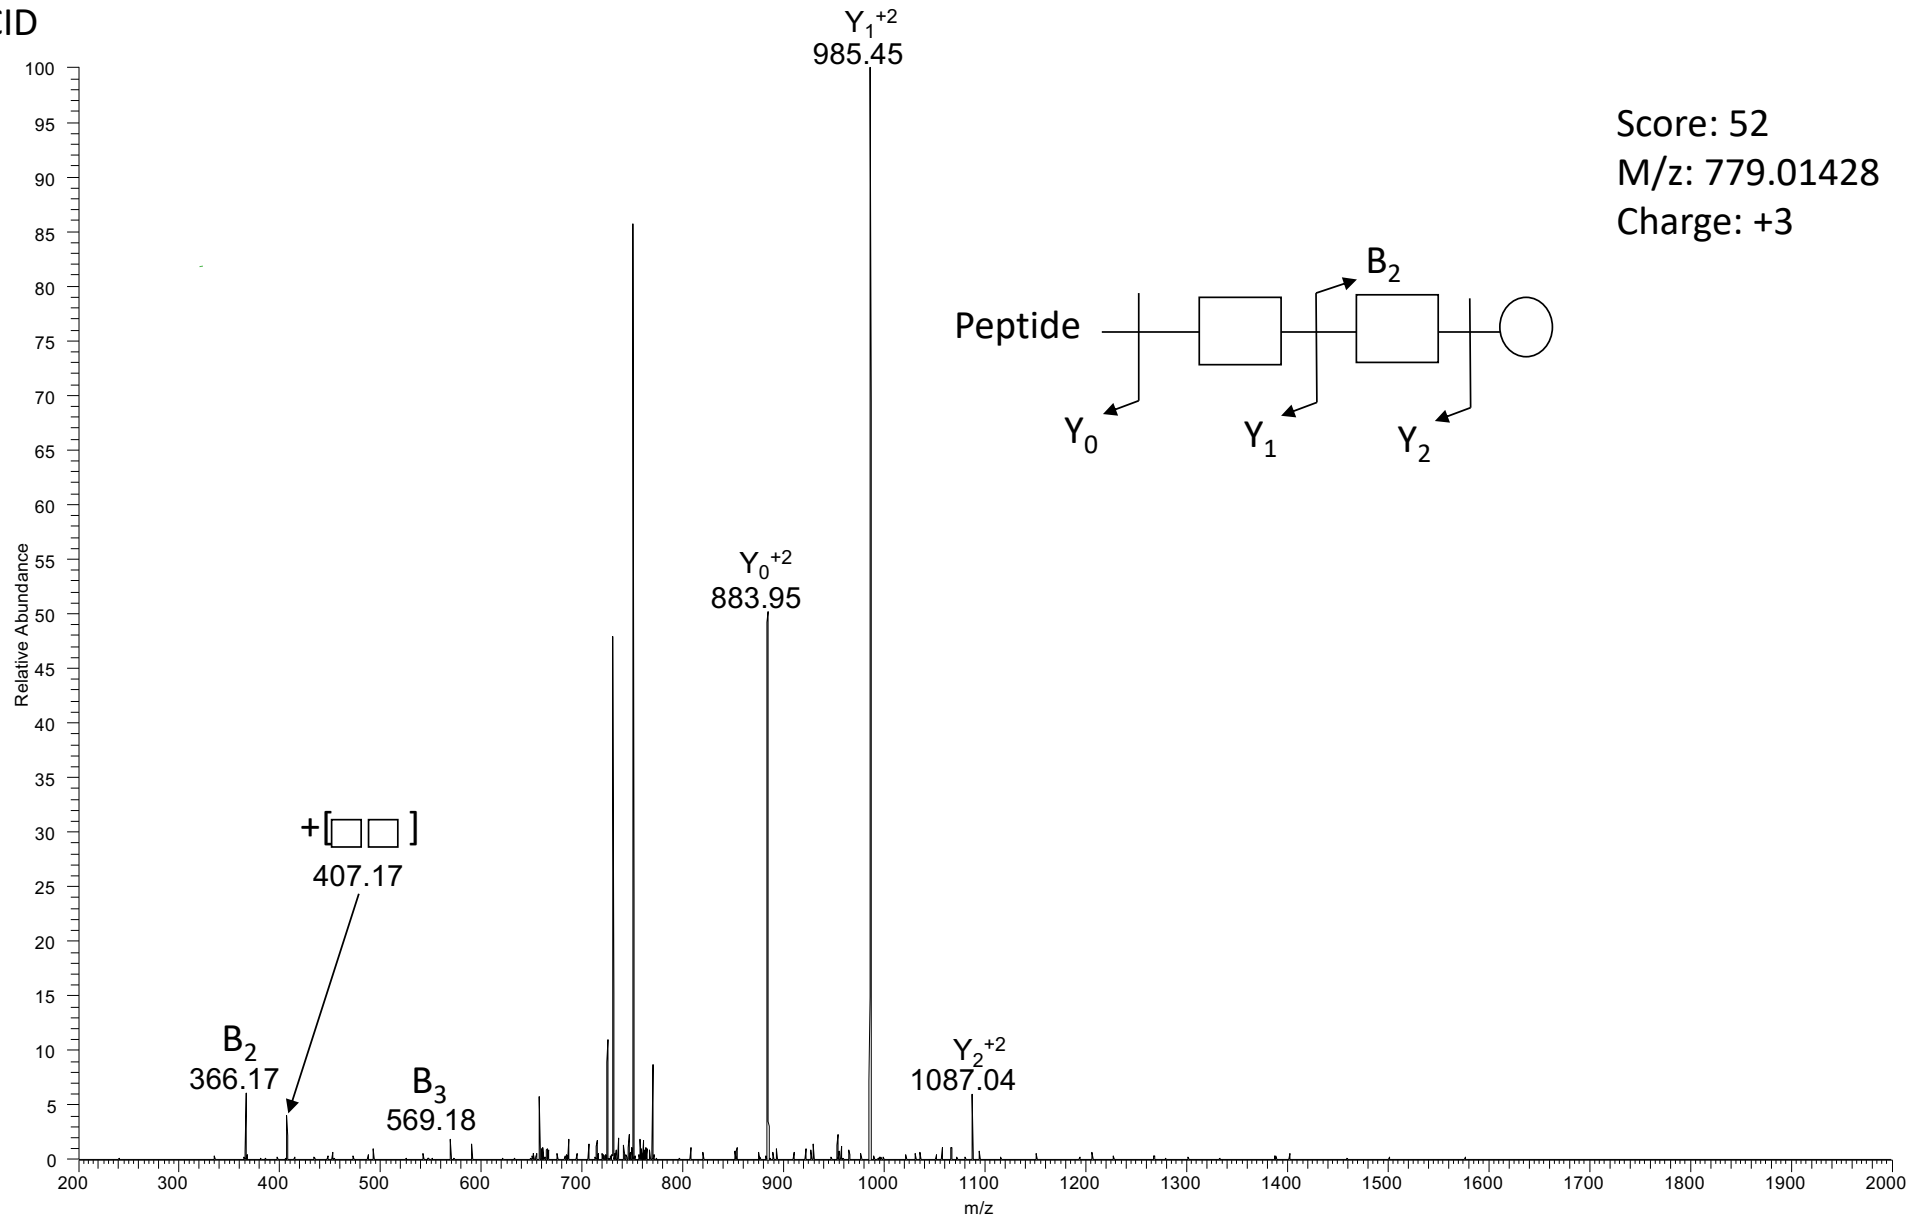

FTMS-HCD

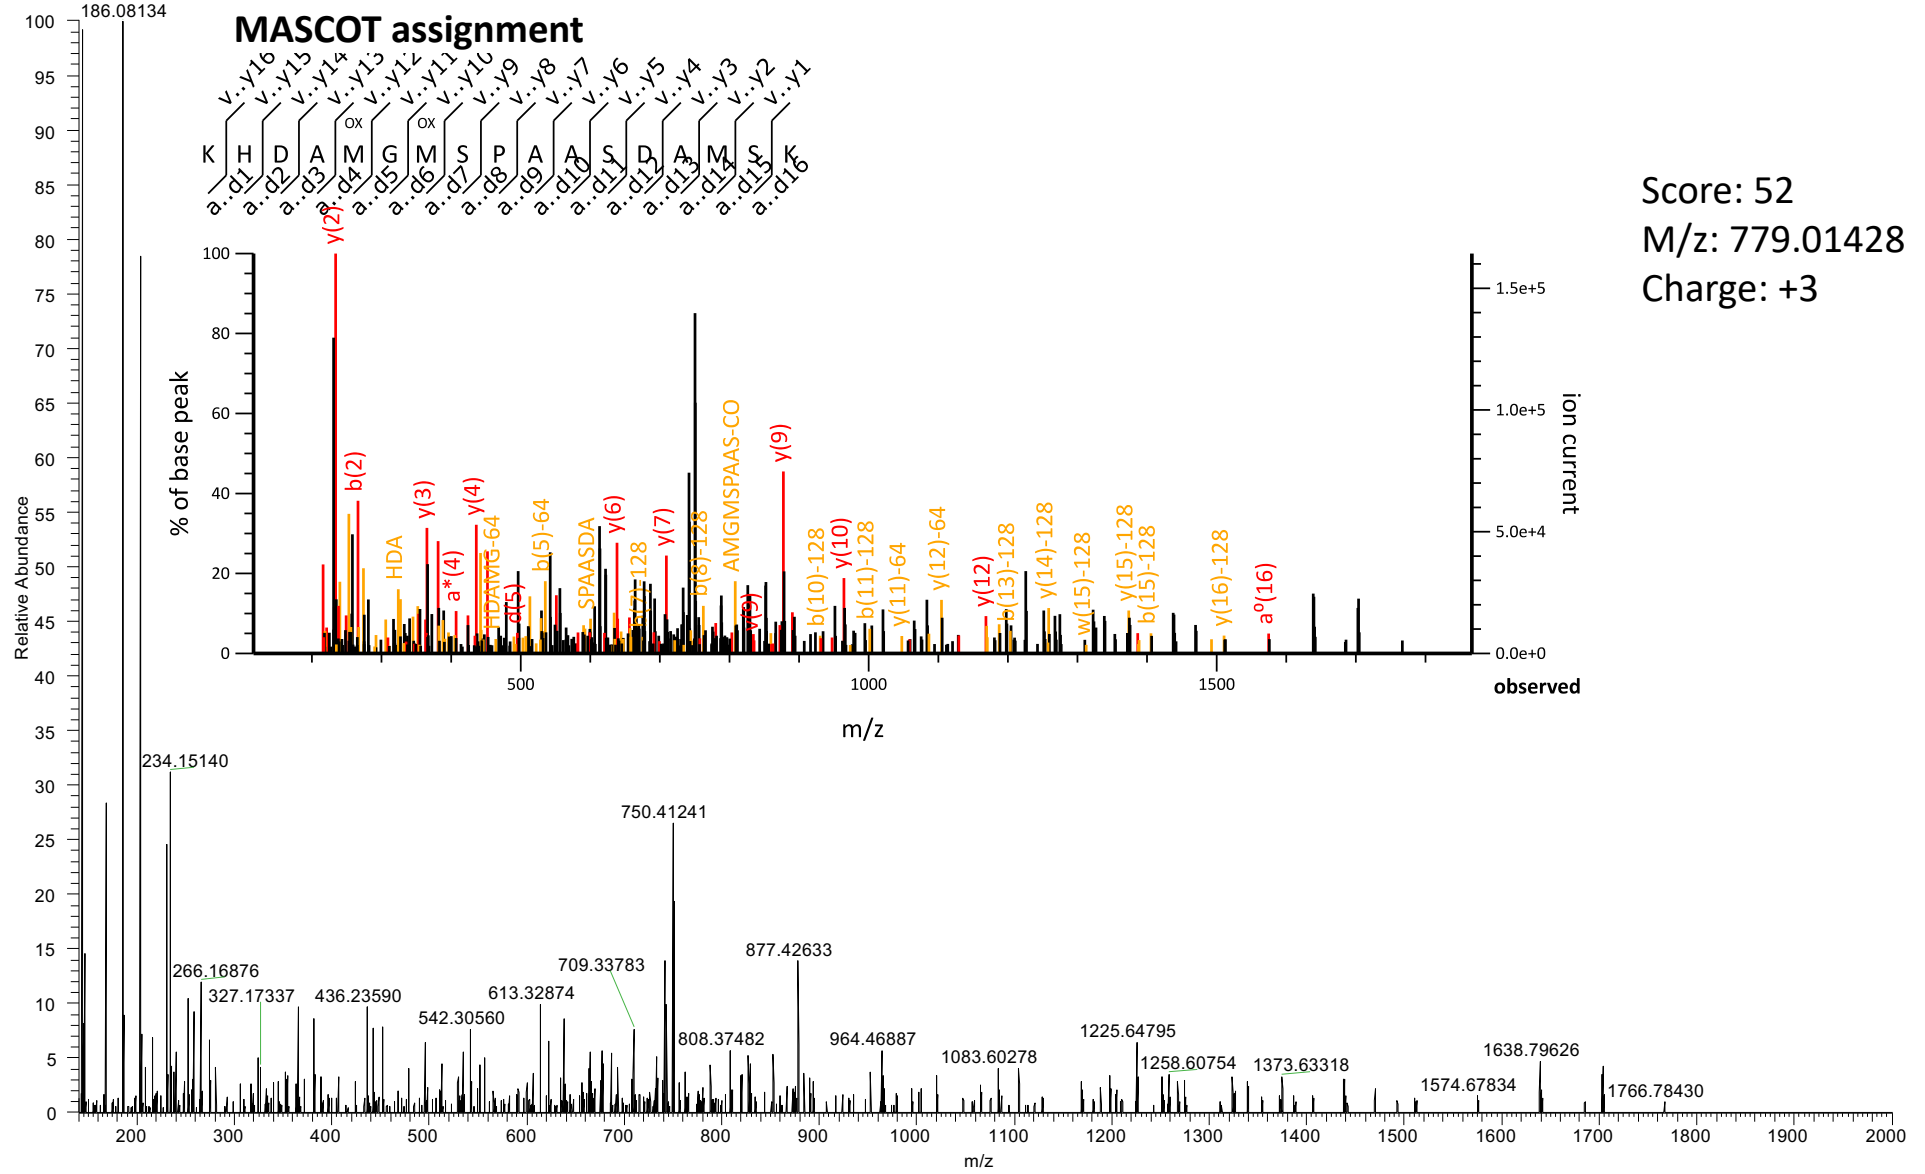

ITMS-CID

Score: 103  
M/z: 768.34943  
Charge: +3

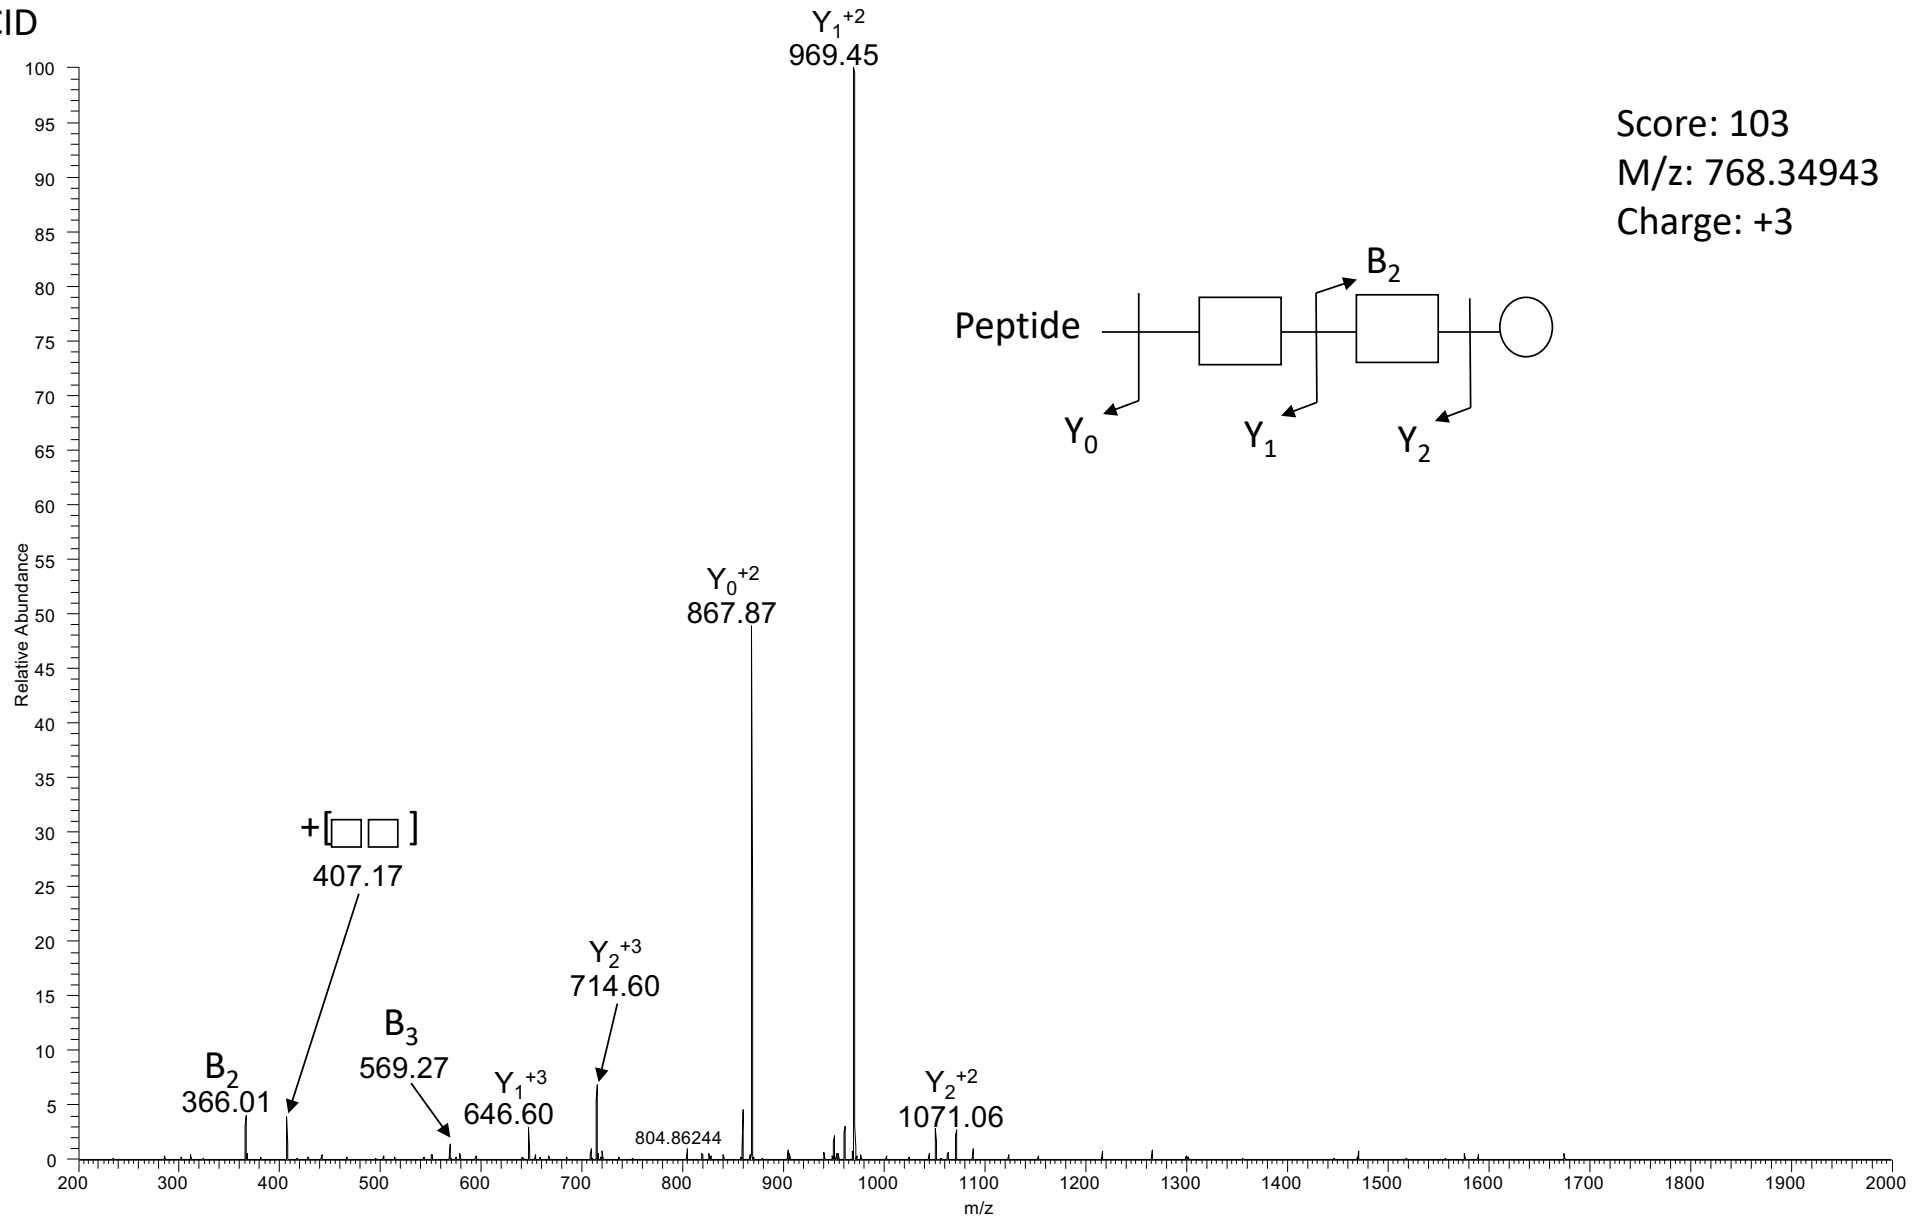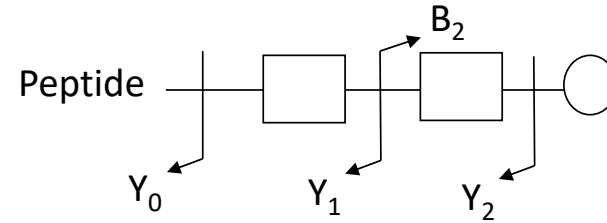

FTMS-HCD

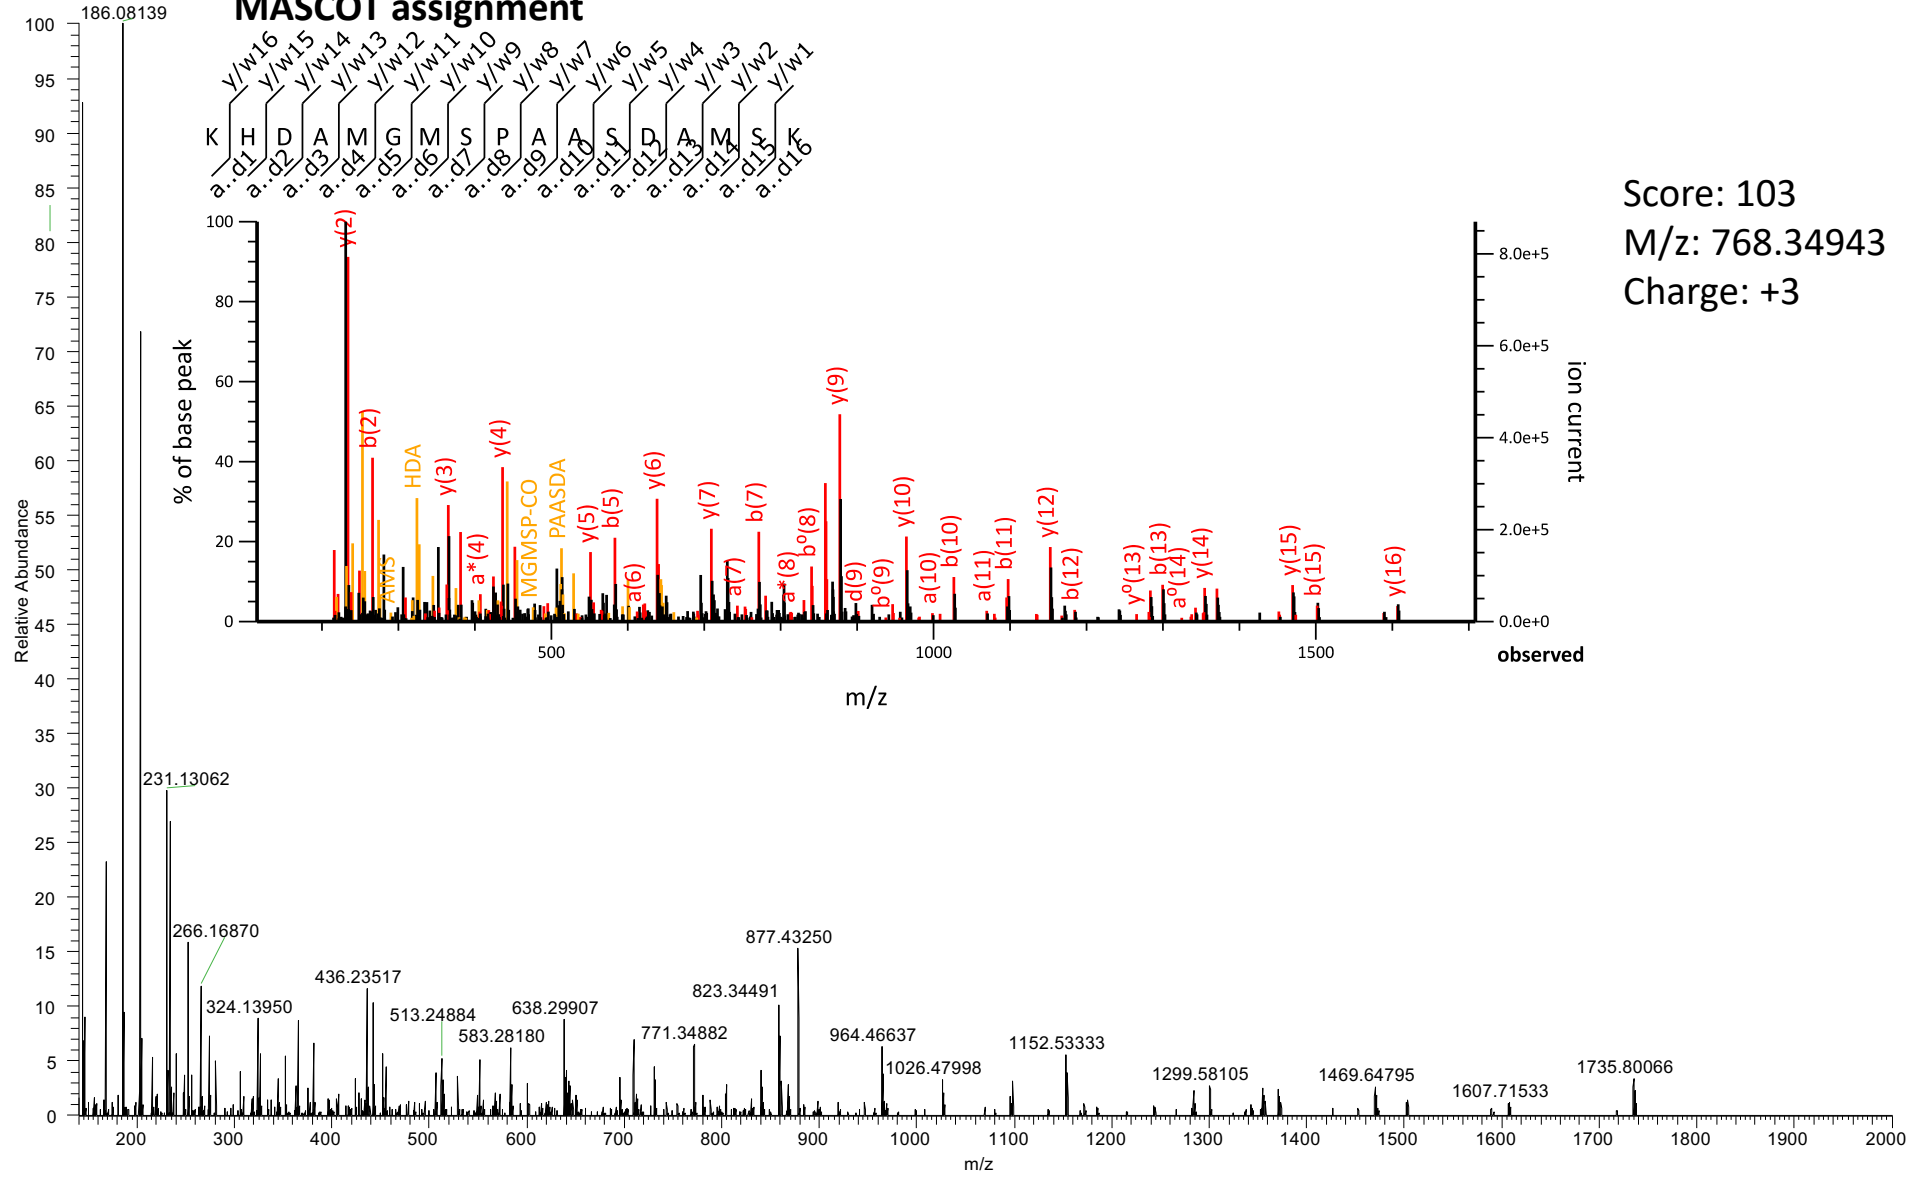

ITMS-CID

Score: 20  
M/z: 801.68872  
Charge: +3

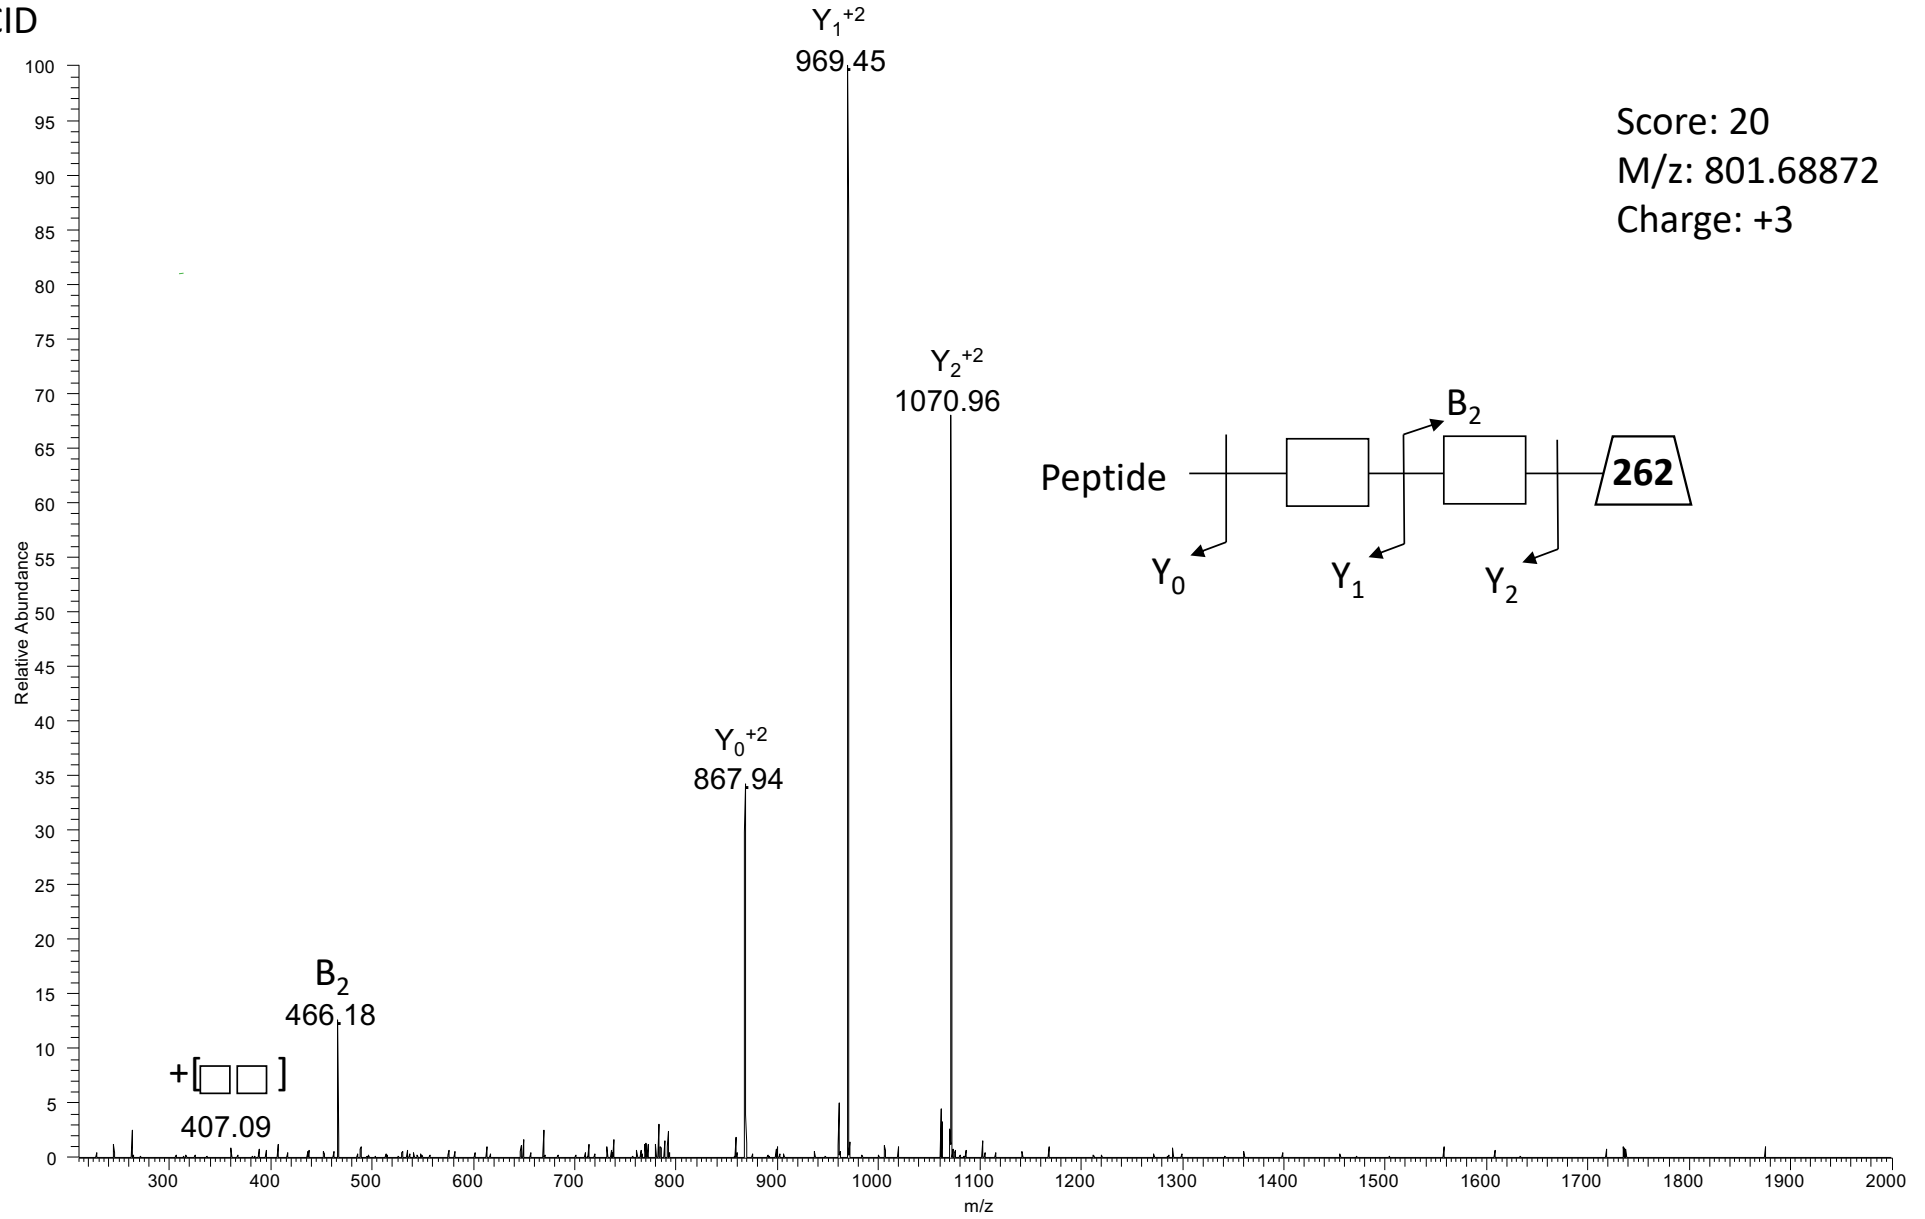

FTMS-HCD

### MASCOT assignment

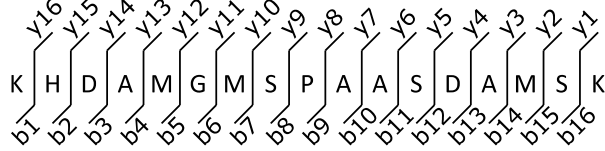

Score: 20  
M/z: 801.68872  
Charge: +3

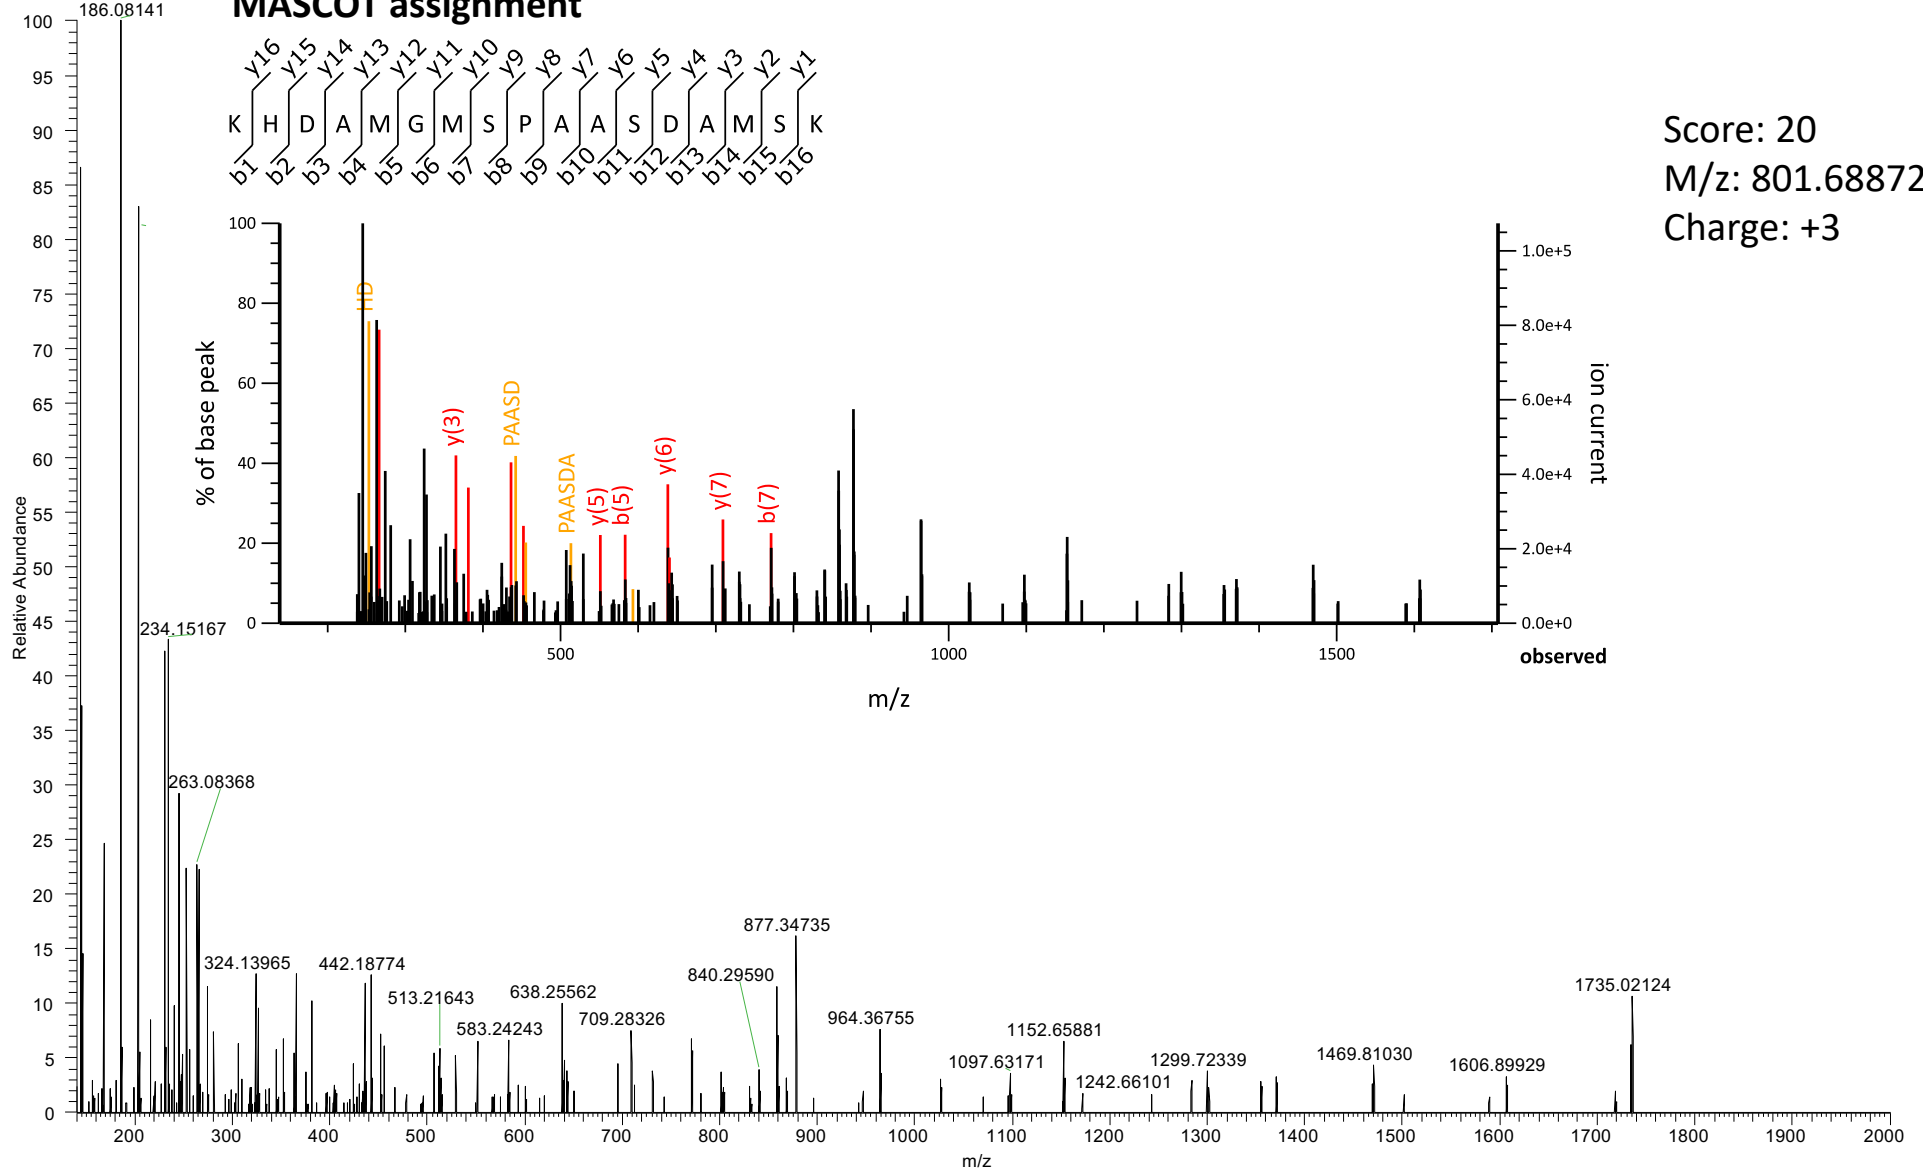

ITMS-CID

Score: 73  
M/z: 807.02075  
Charge: +3

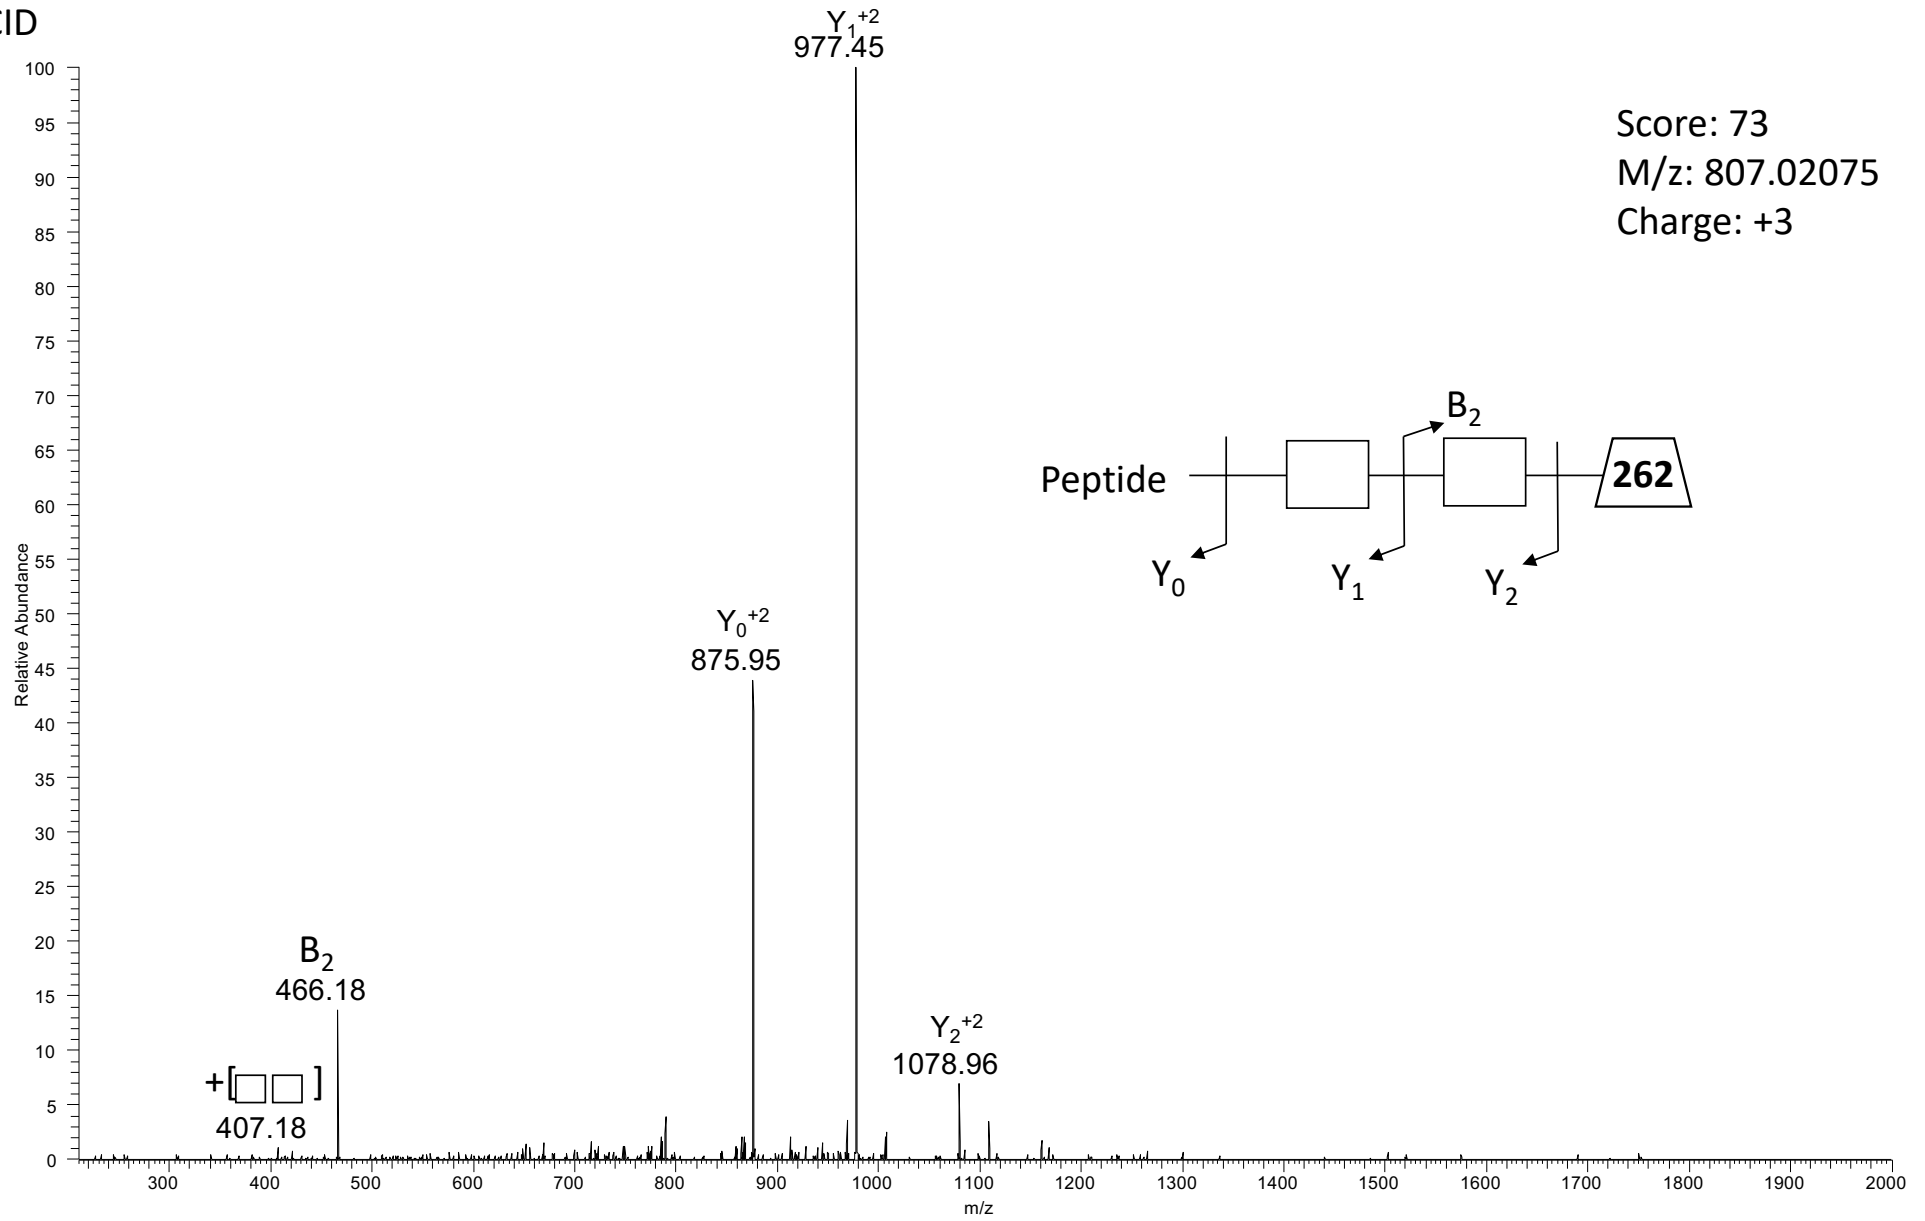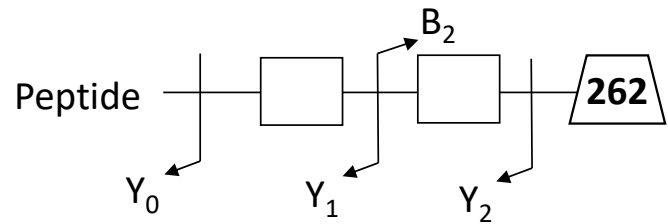

FTMS-HCD

MASCOT assignment

Score: 73

M/z: 807.02075

Charge: +3

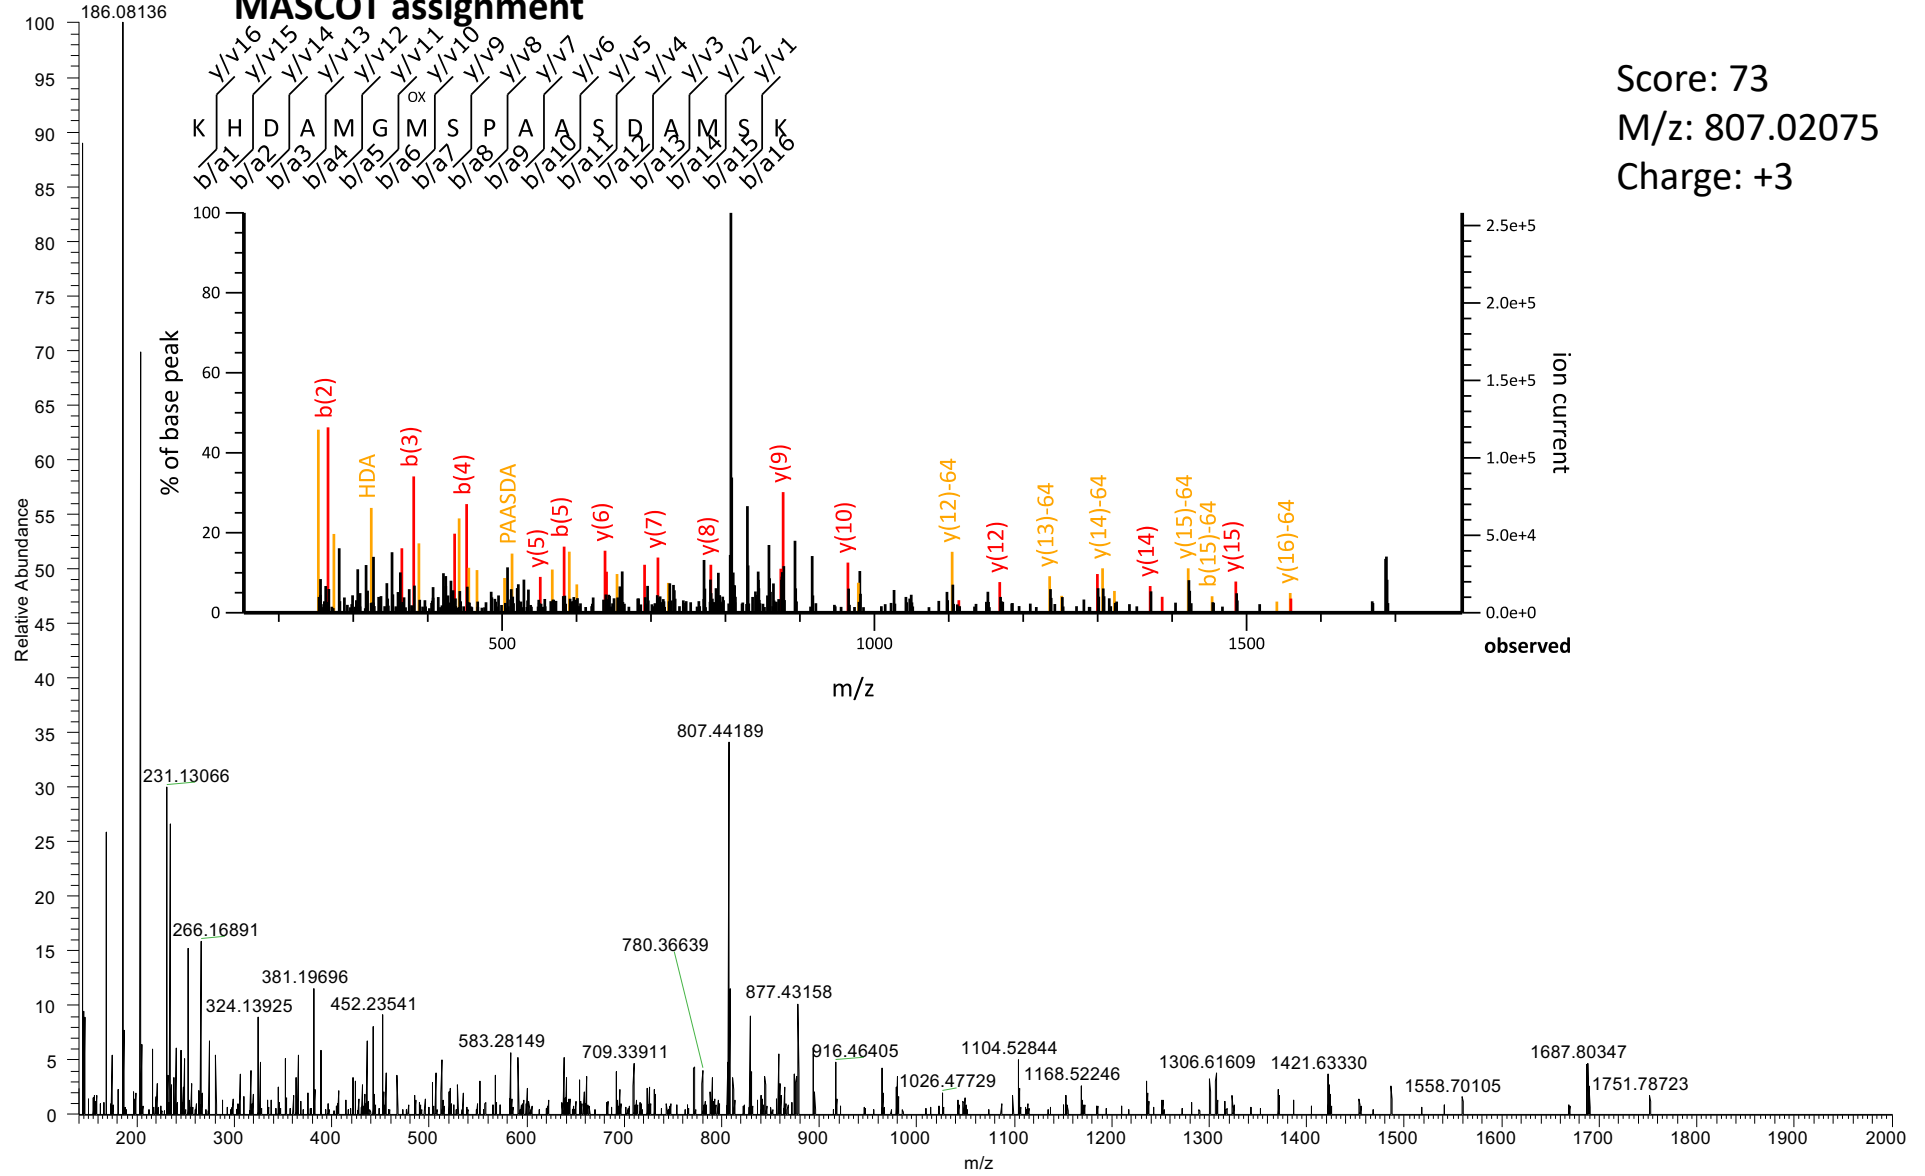



ITMS-CID

Score: 89  
M/z: 1038.50659  
Charge: +3

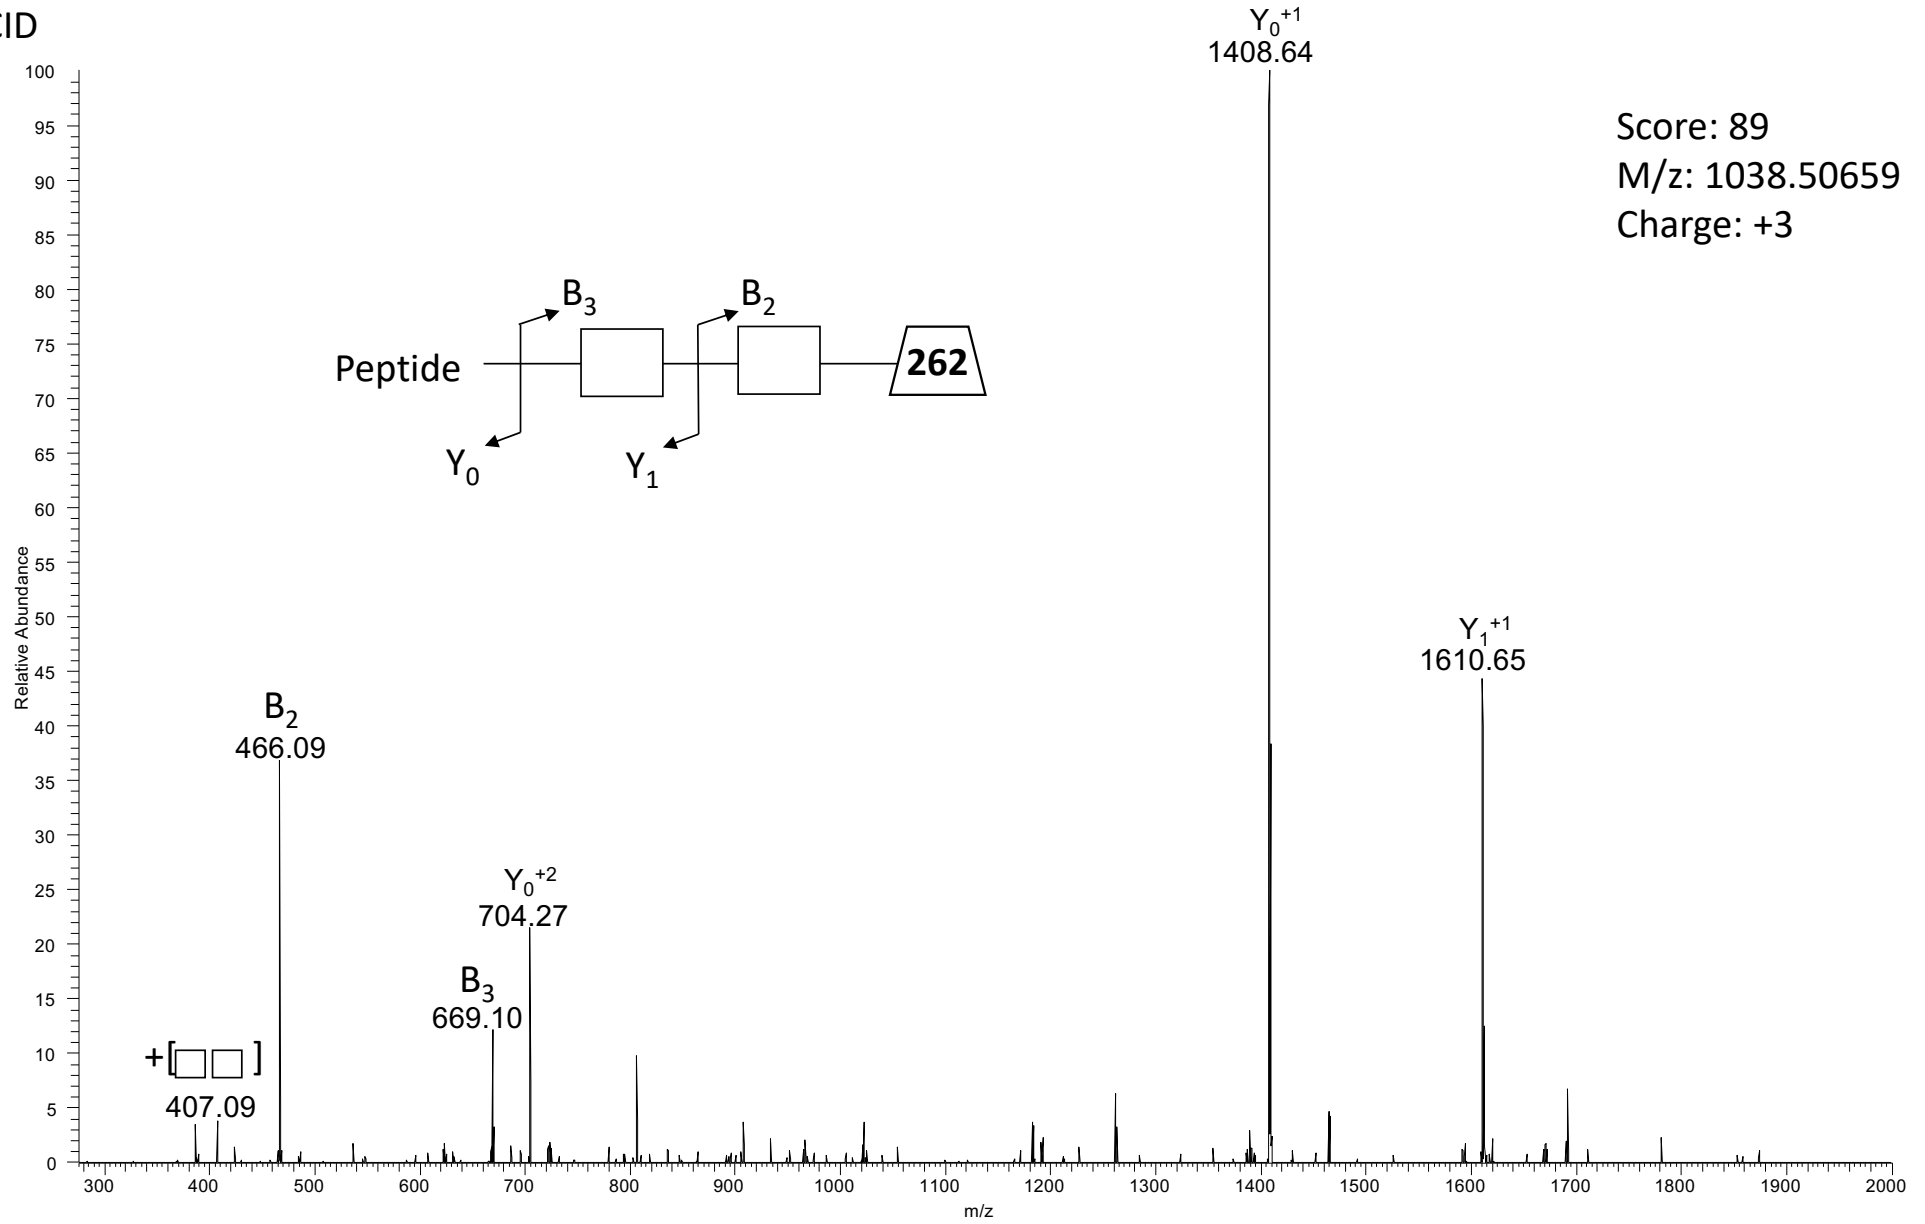

FTMS-HCD

### MASCOT assignment

Score: 89

M/z: 1038.50659

Charge: +3

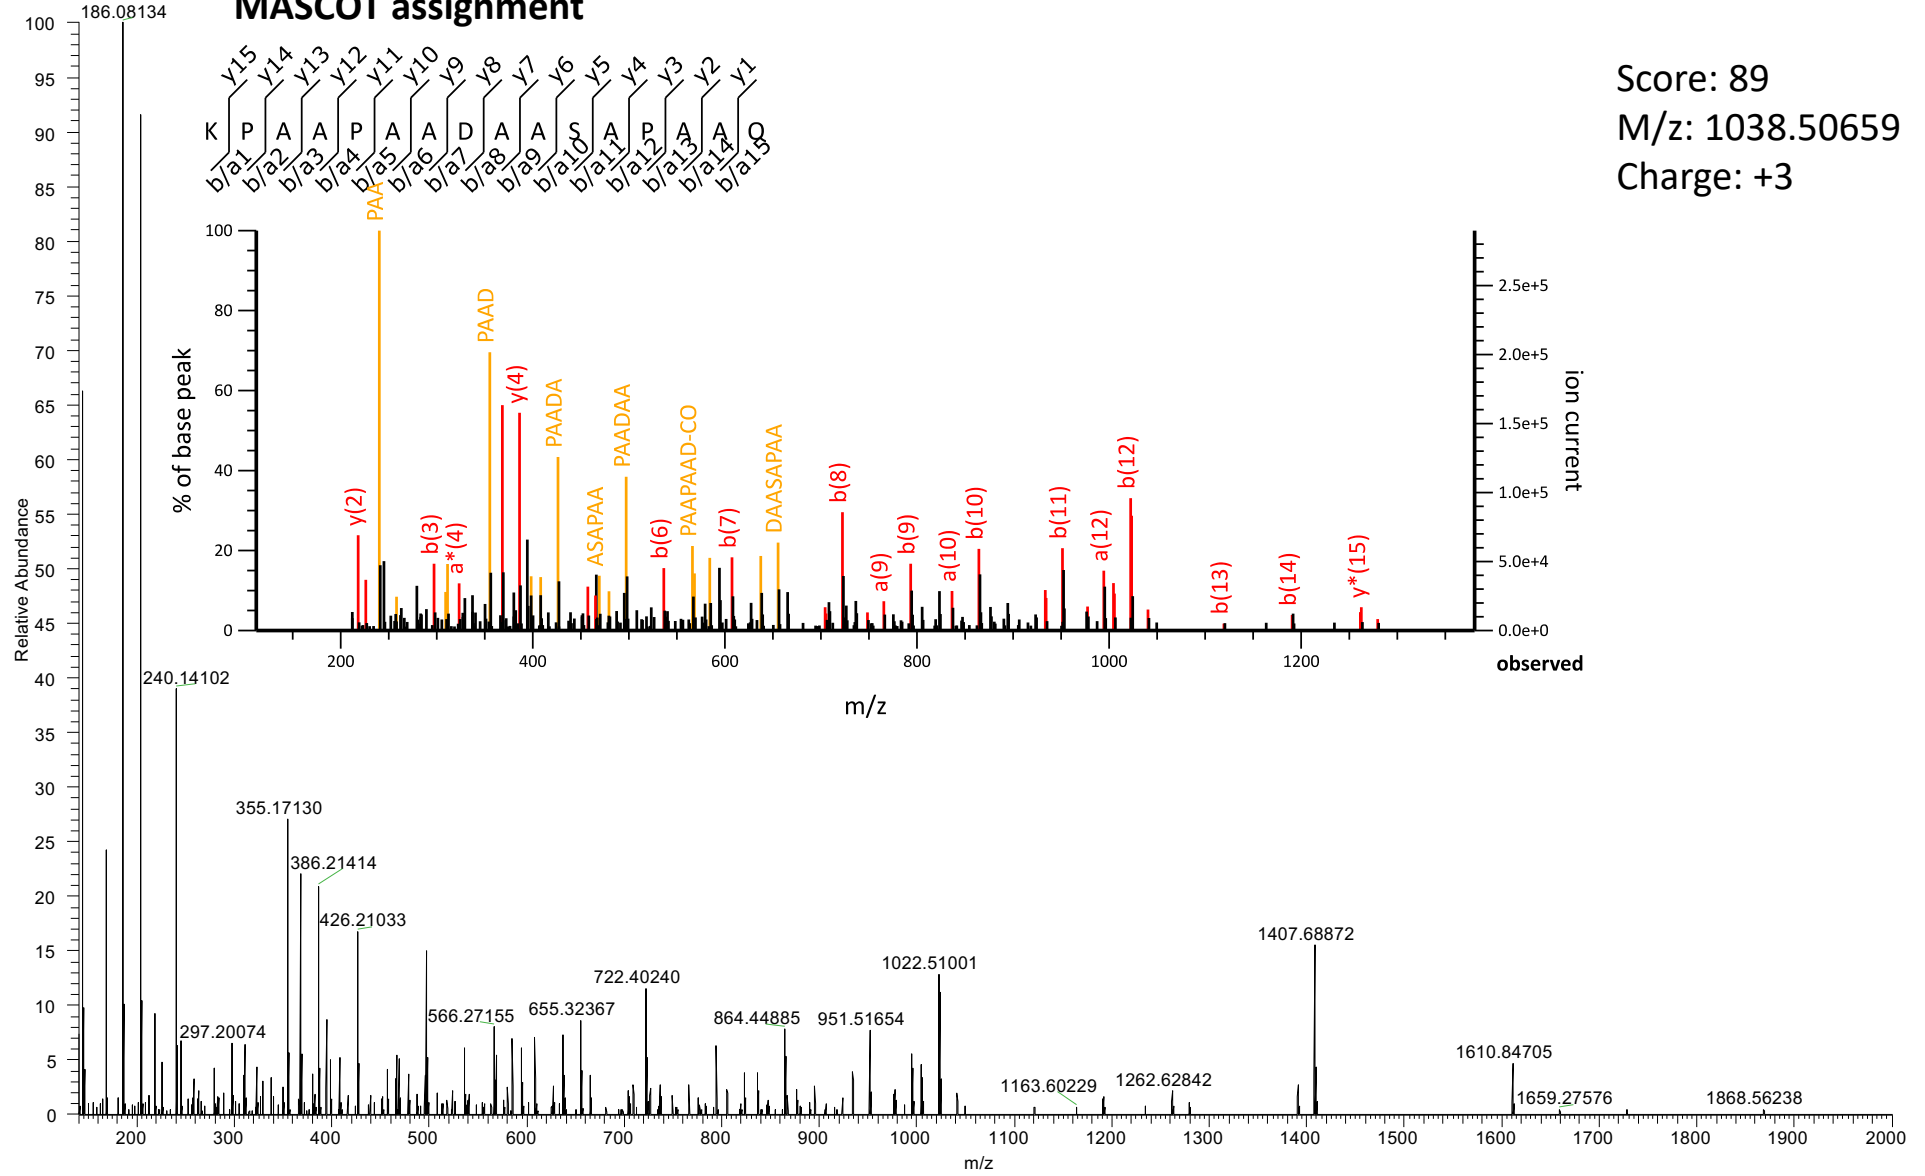

# ITMS-CID

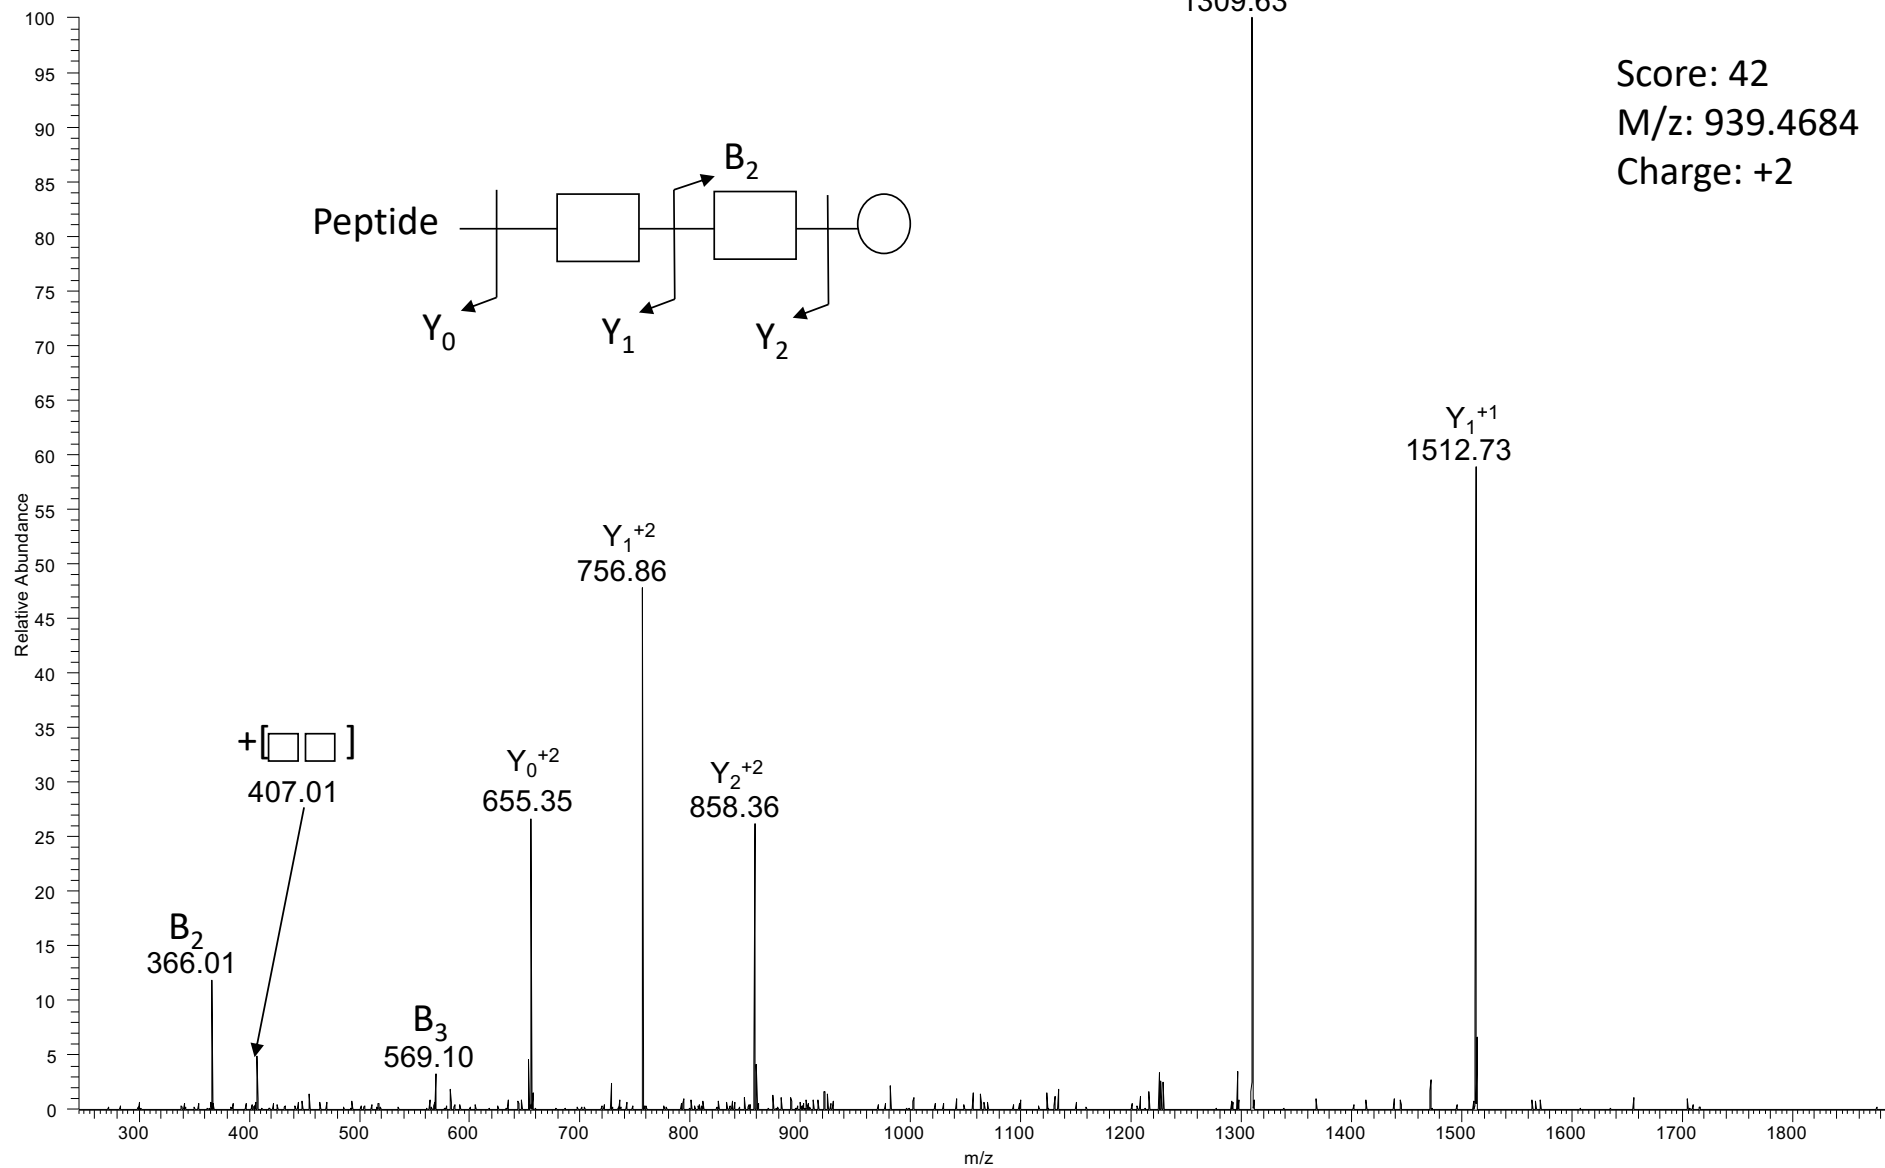

Score: 42  
M/z: 939.4684  
Charge: +2

FTMS-HCD

### MASCOT assignment

P L T A G A A A P S A S A P K  
b1/r14 b1/r13 b1/r12 b1/r11 b1/r10 b1/r9 b1/r8 b1/r7 b1/r6 b1/r5 b1/r4 b1/r3 b1/r2 b1/r1

Score: 42  
M/z: 939.4684  
Charge: +2

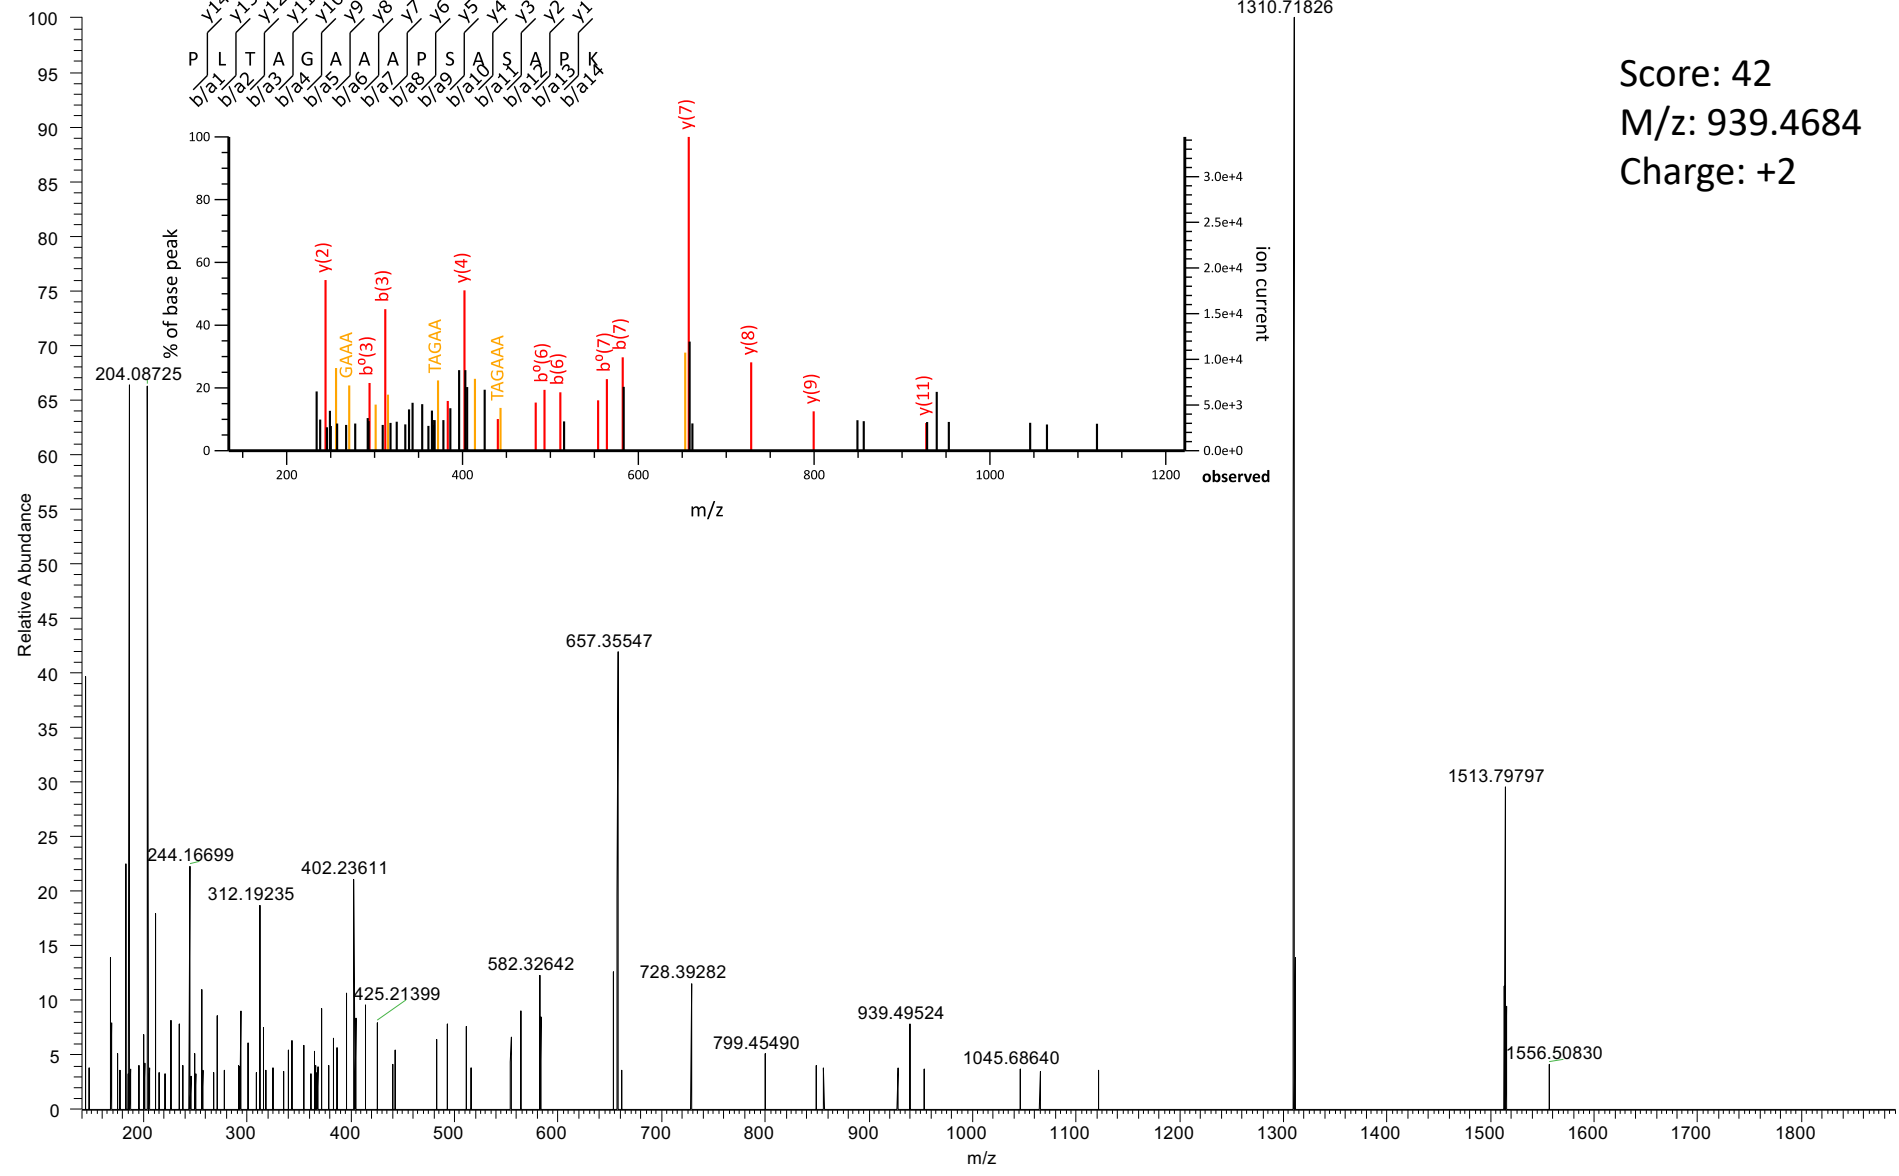

ITMS-CID

Score: 89  
M/z: 989.48029  
Charge: +2

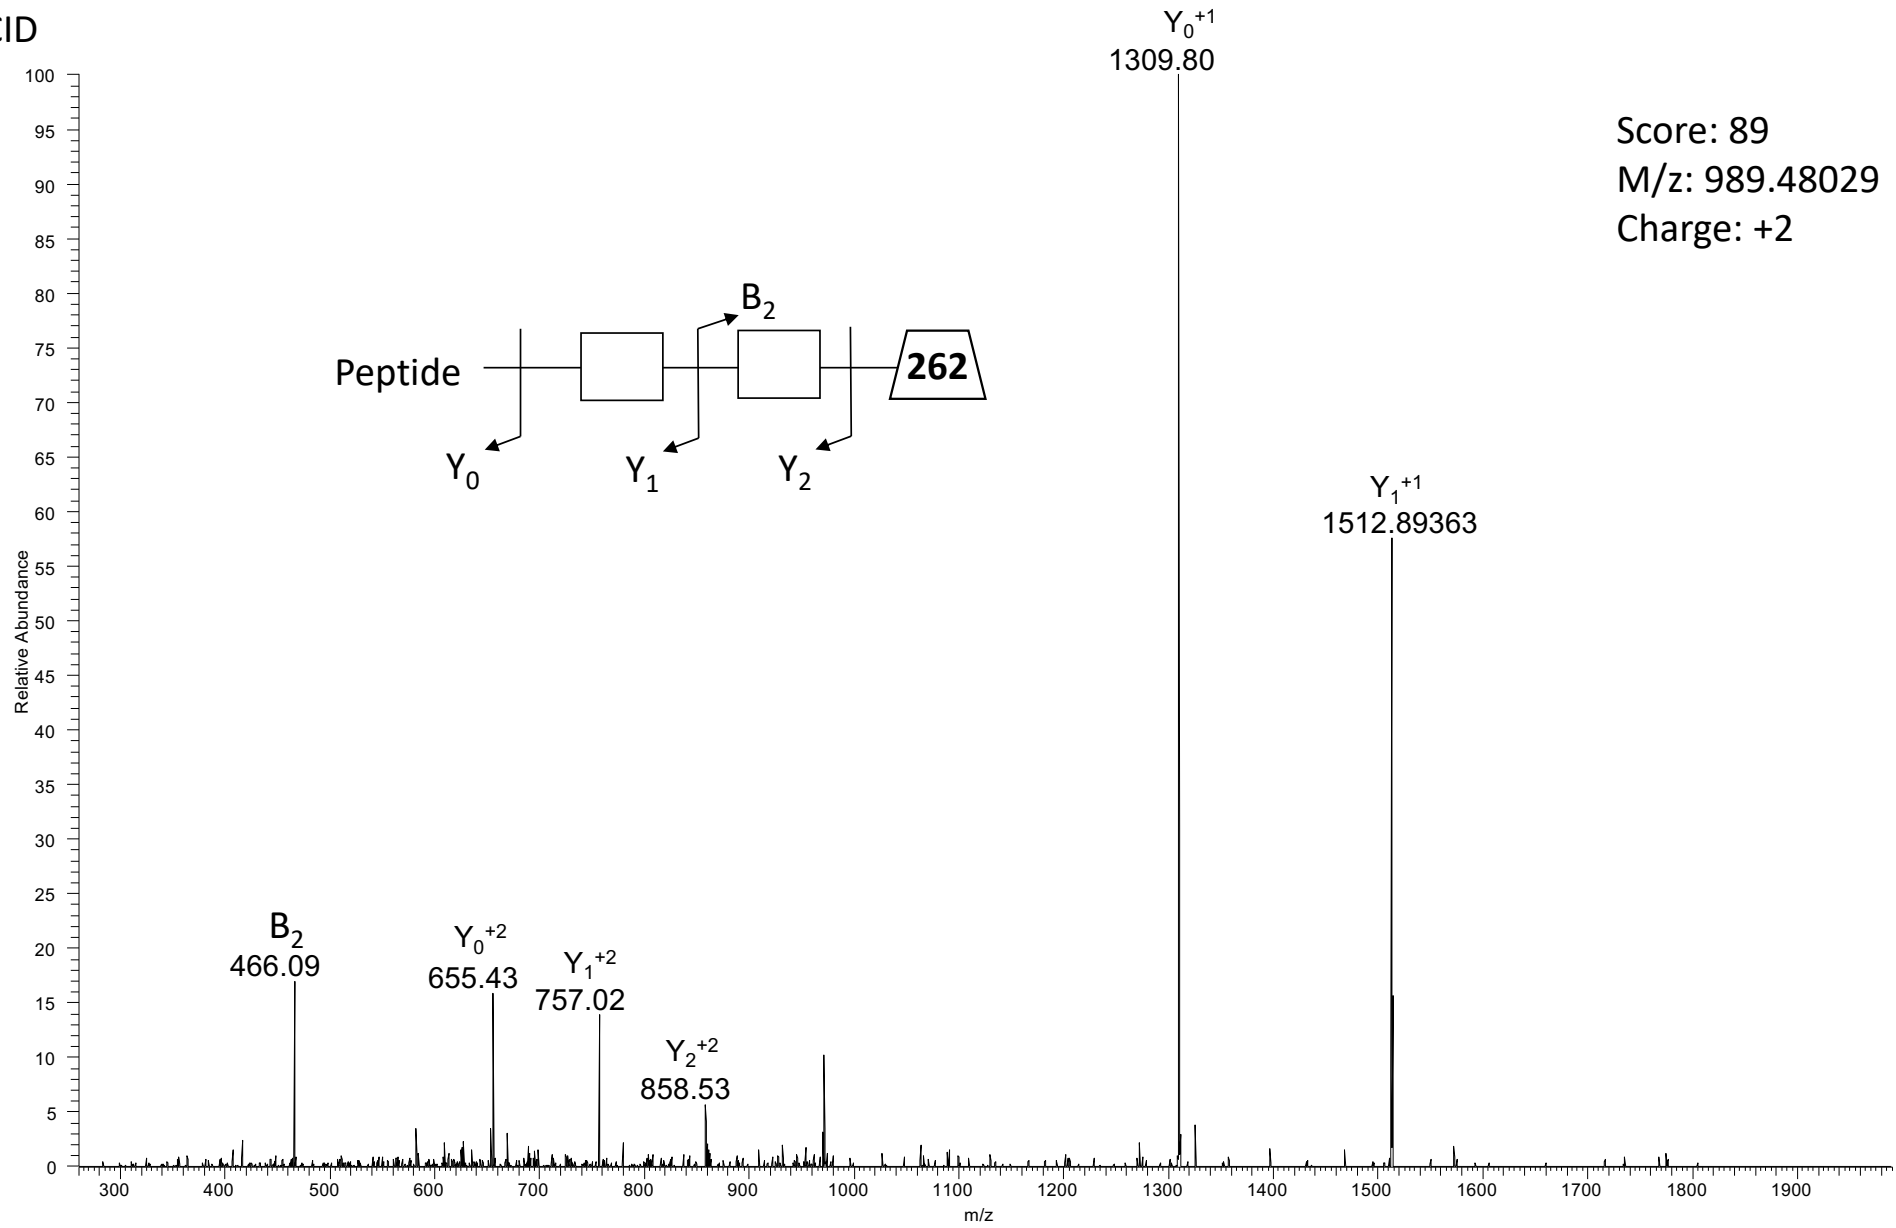

# FTMS-HCD

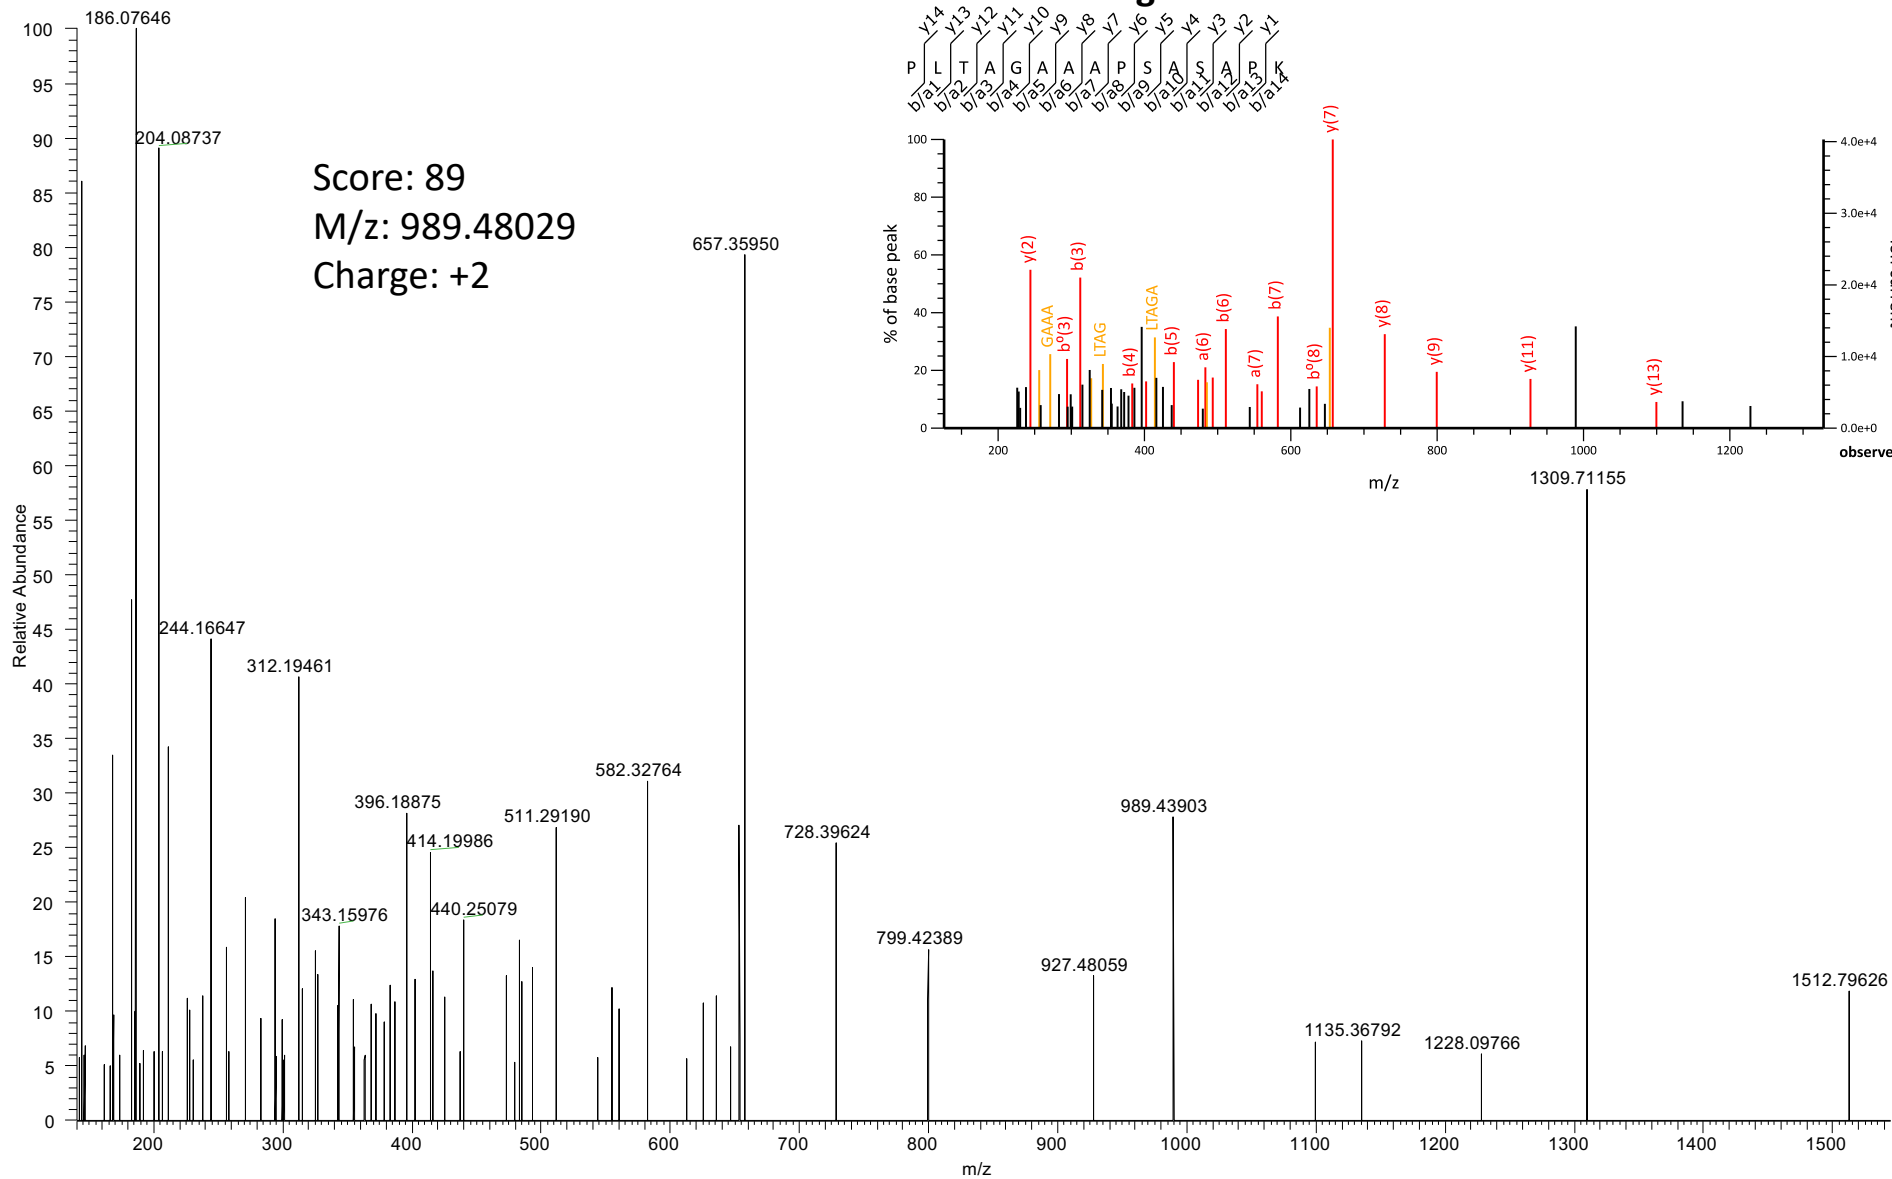

# MASCOT assignment

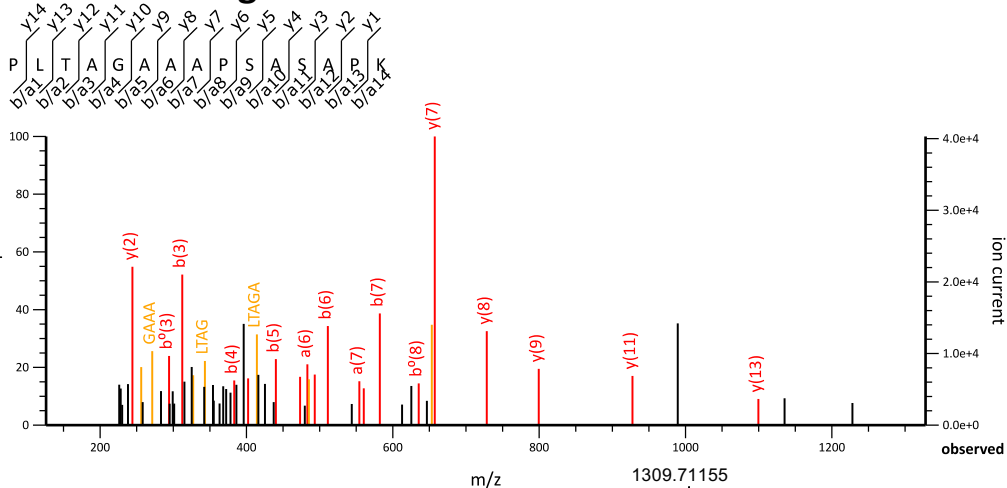

ITMS-CID

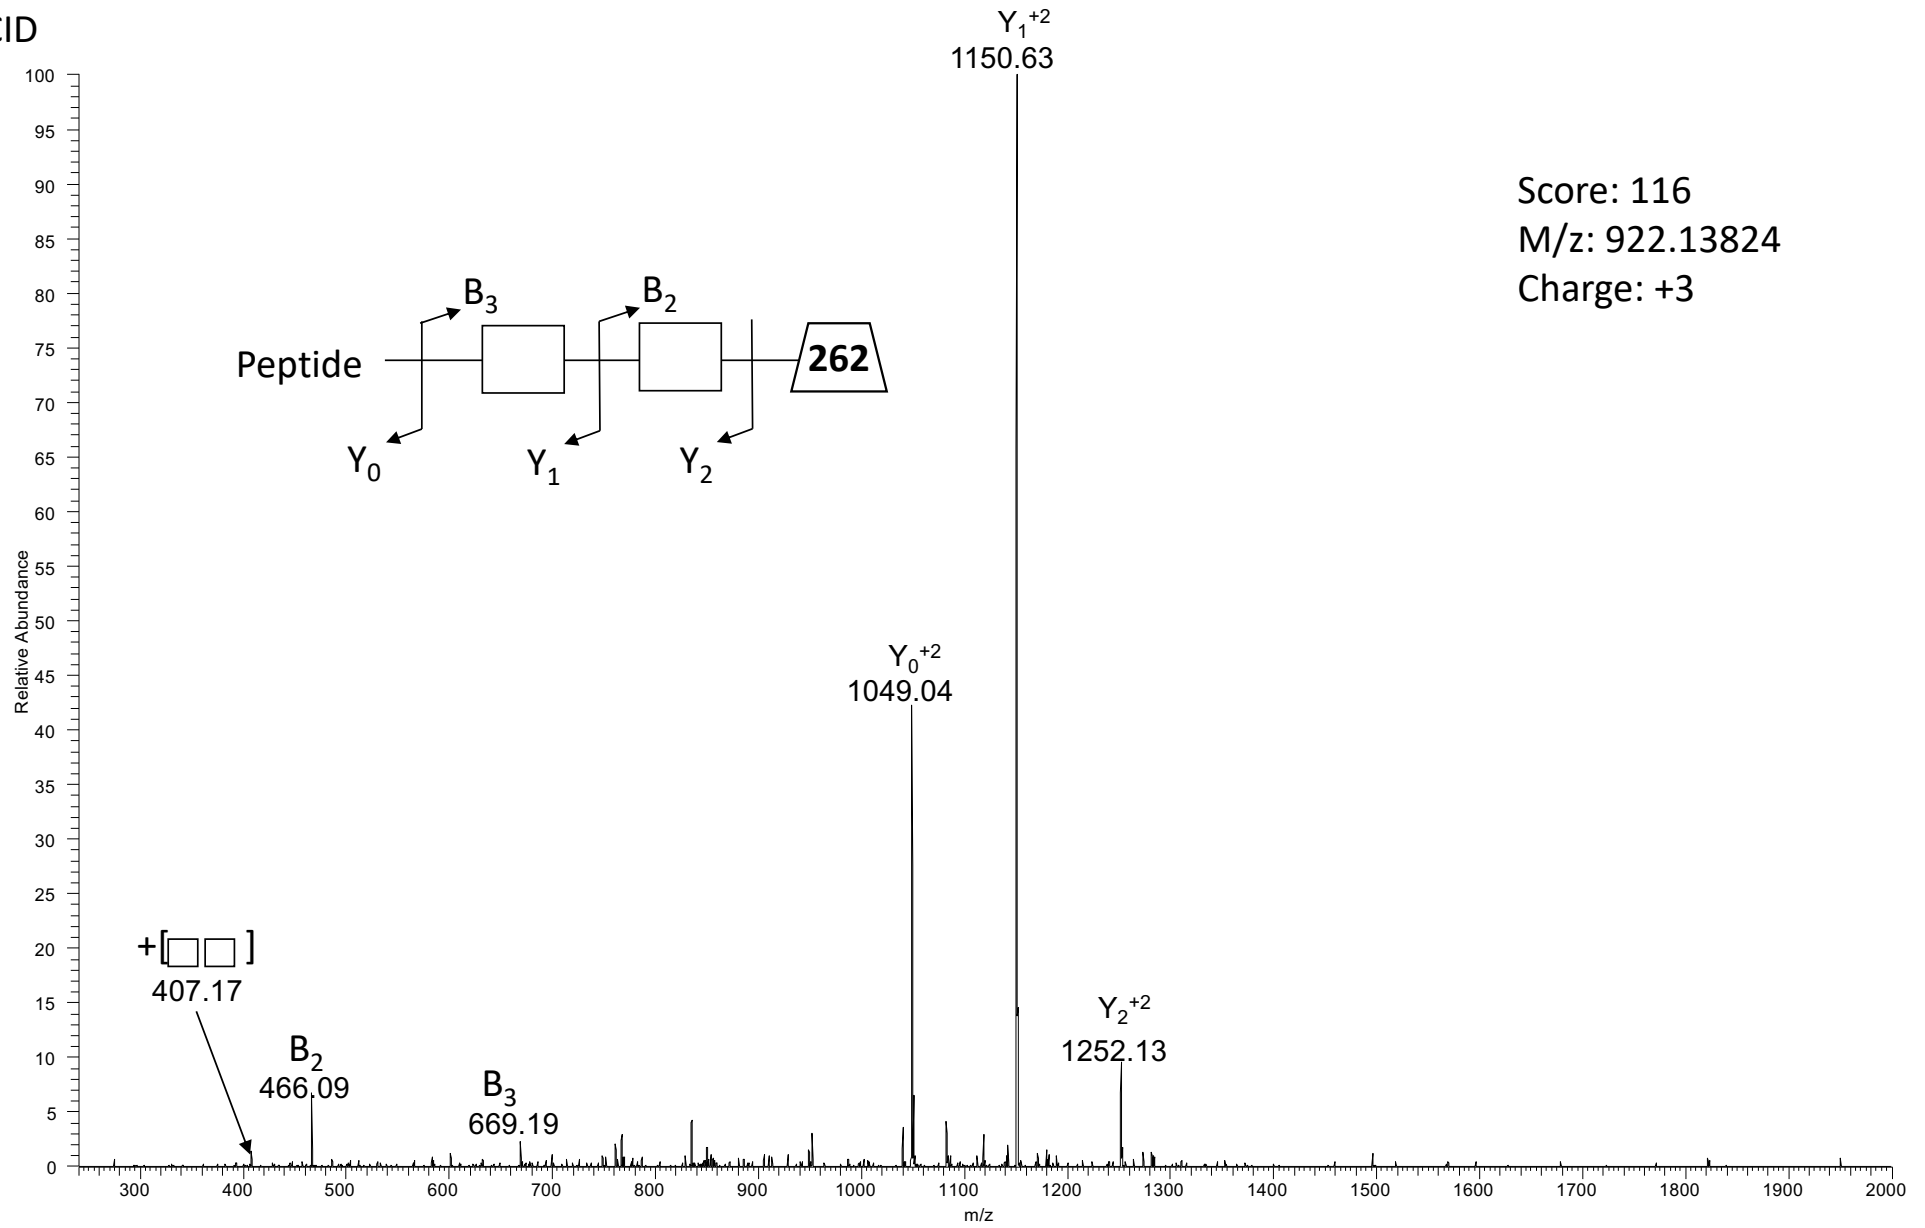

FTMS-HCD

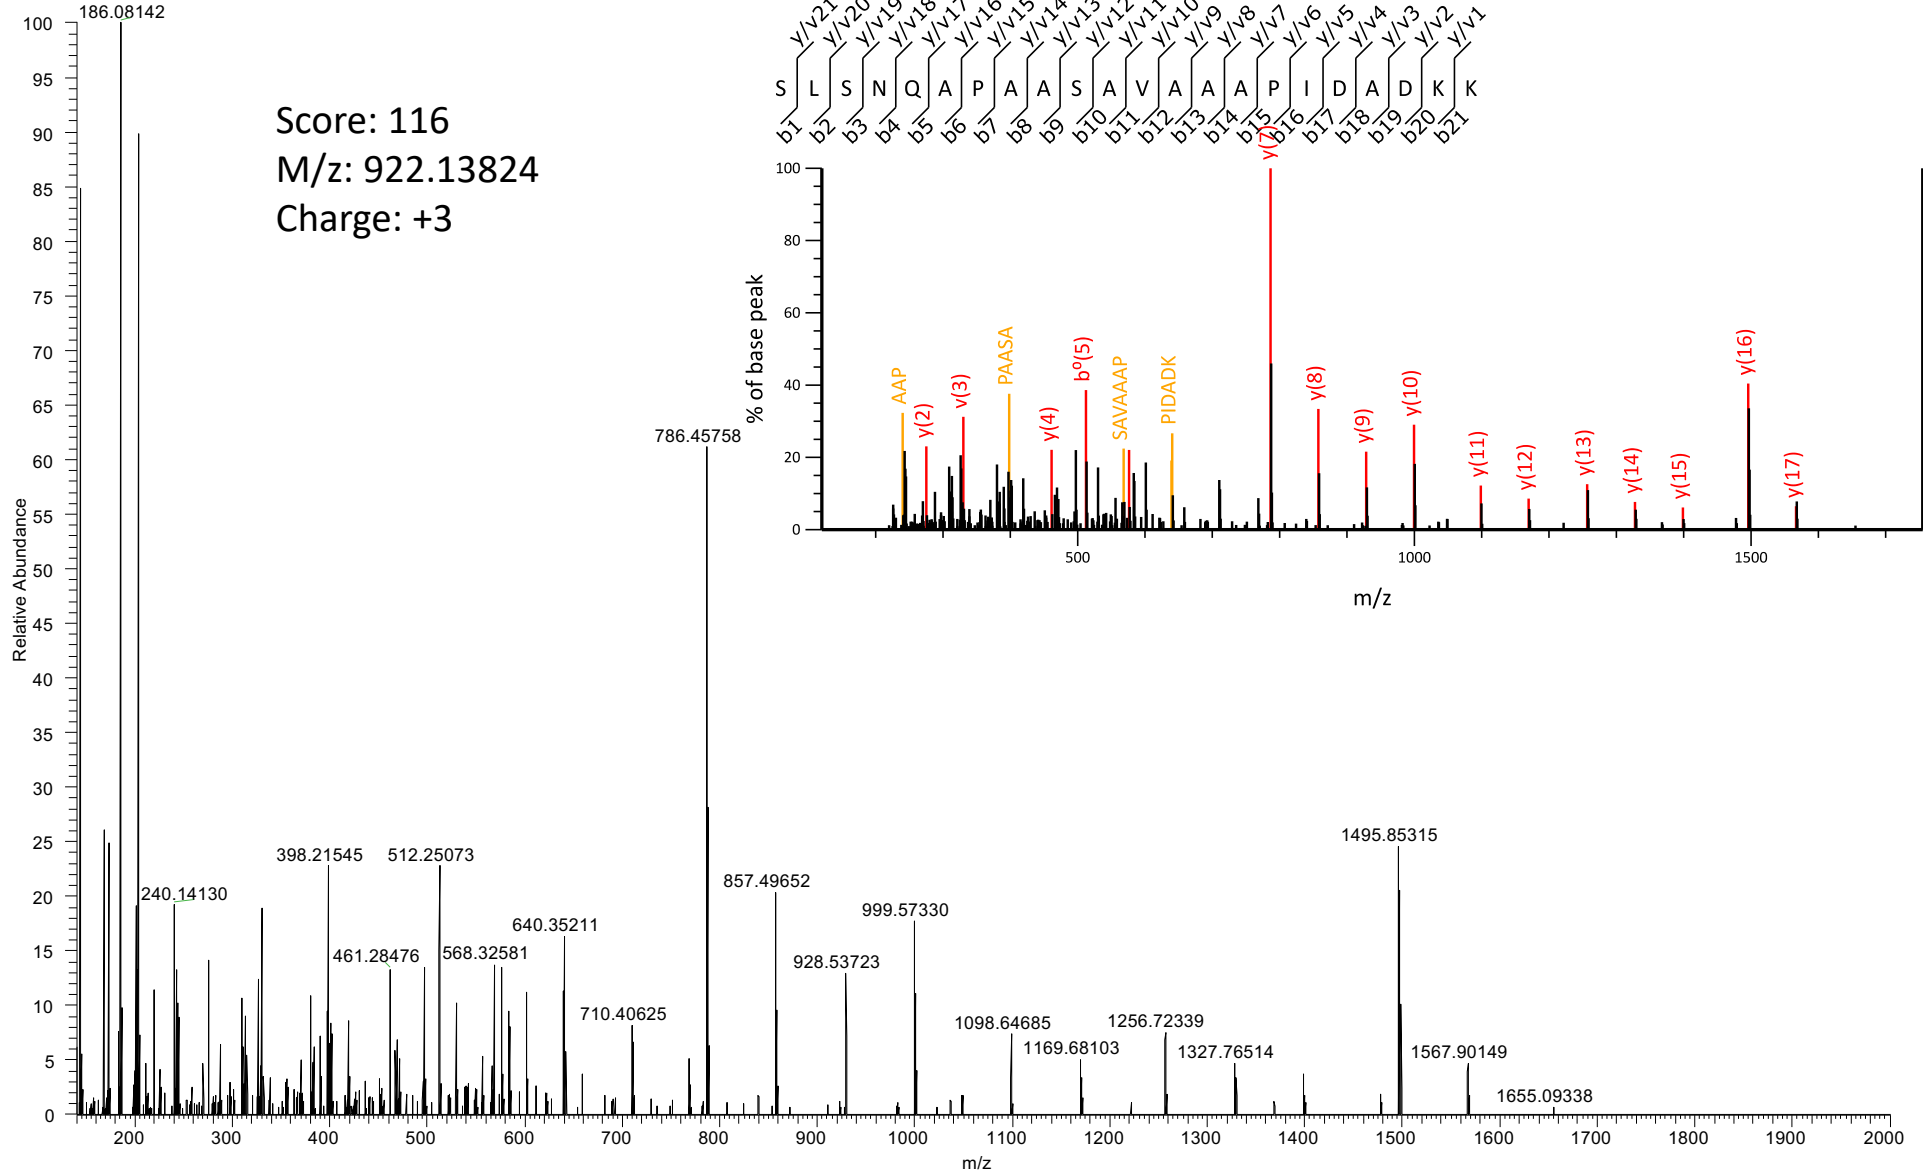

MASCOT assignment

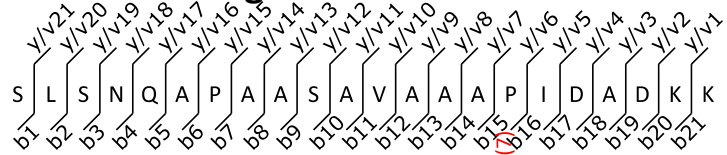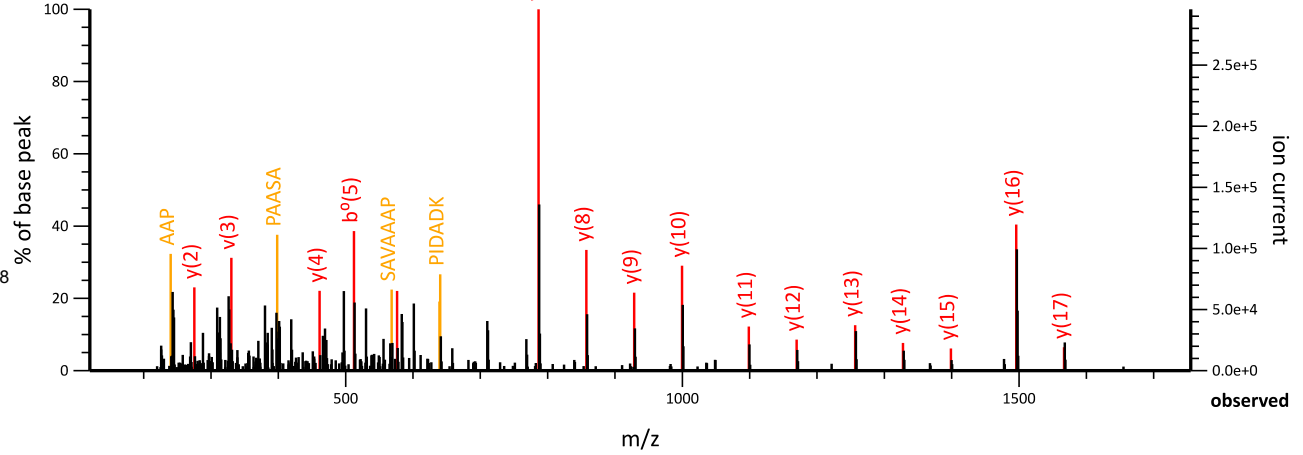

ion current  
2.5e+5  
2.0e+5  
1.5e+5  
1.0e+5  
5.0e+4  
0.0e+0  
observed



# ITMS-CID

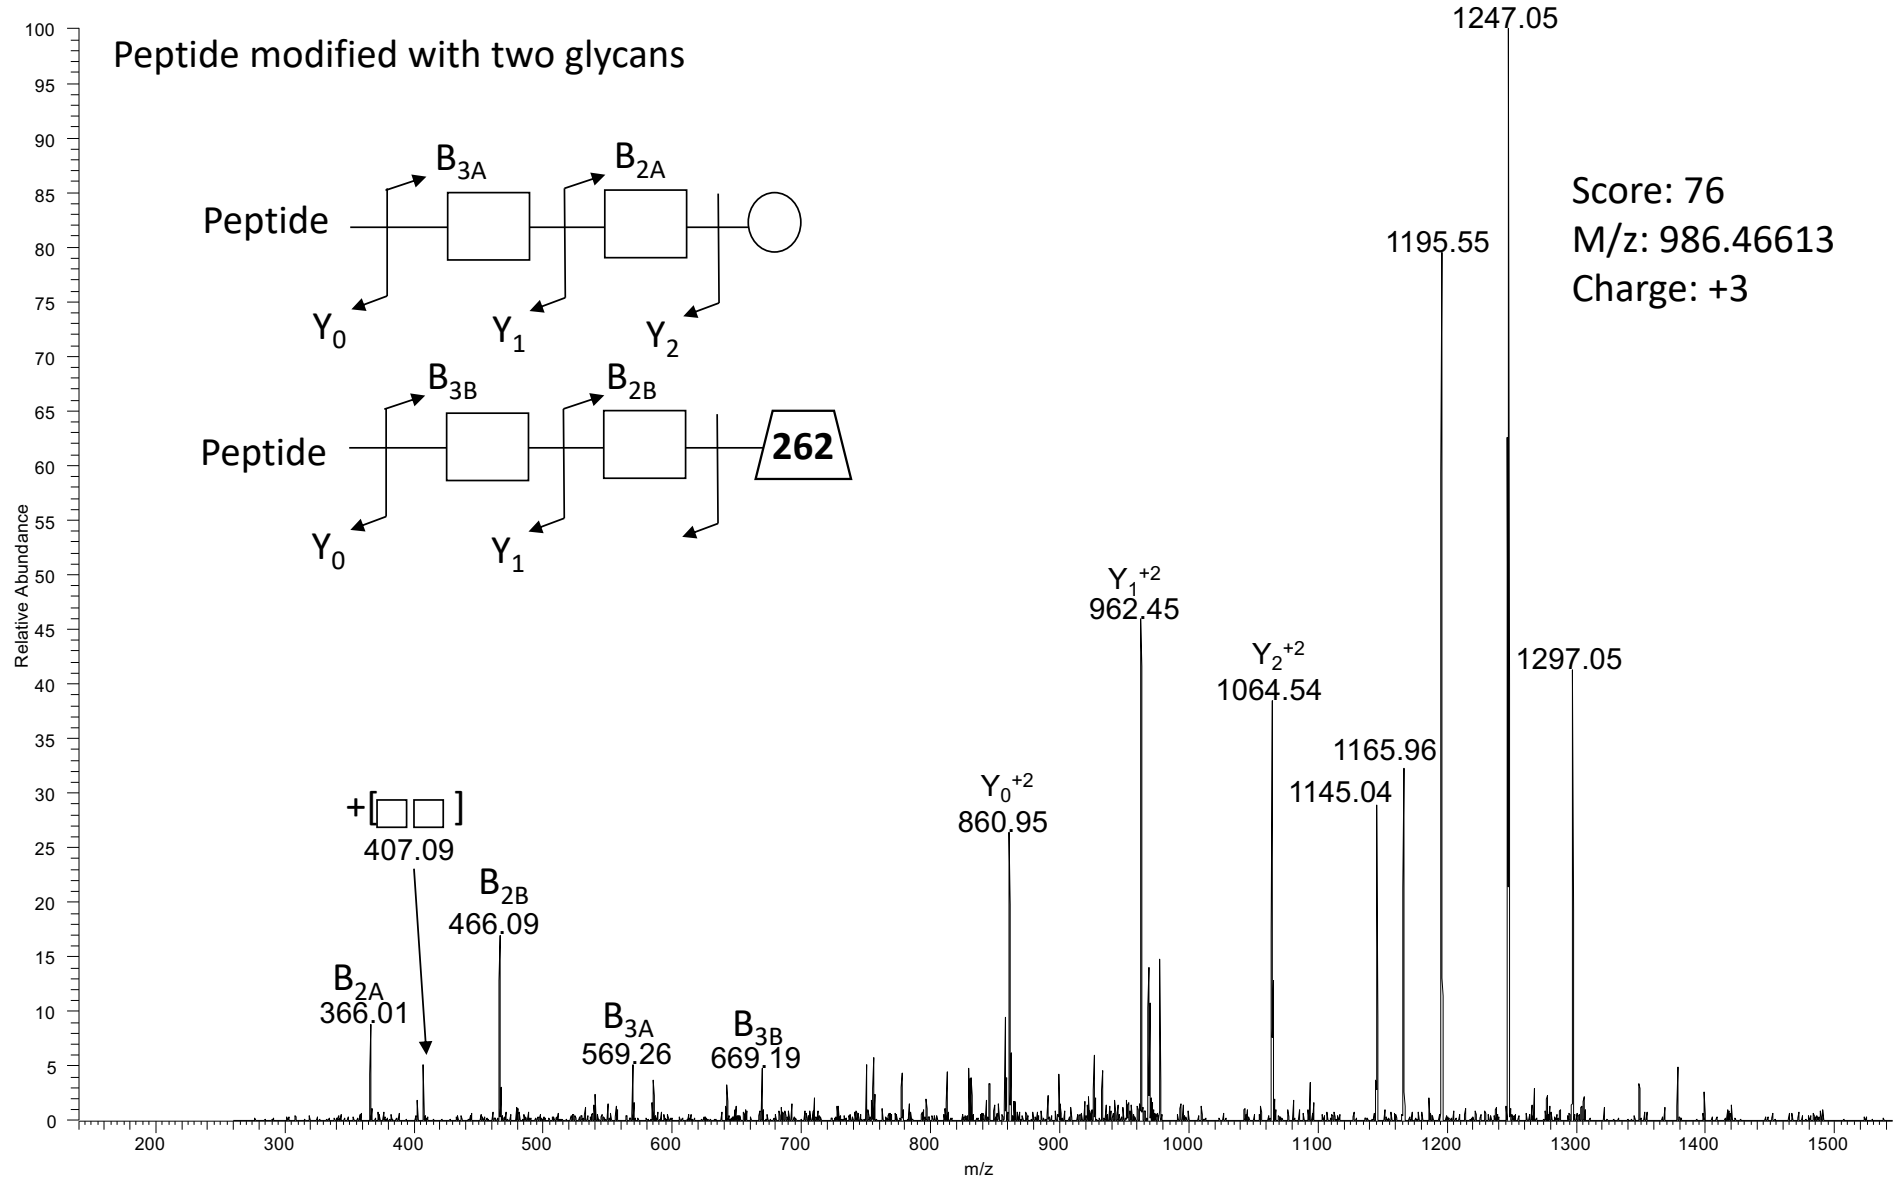

# FTMS-HCD

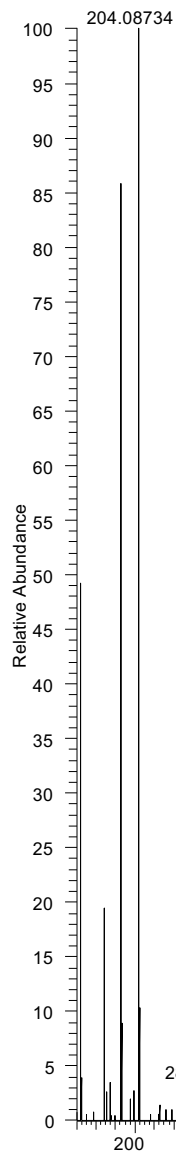

Score: 76  
M/z: 986.46613  
Charge: +3

# MASCOT assignment

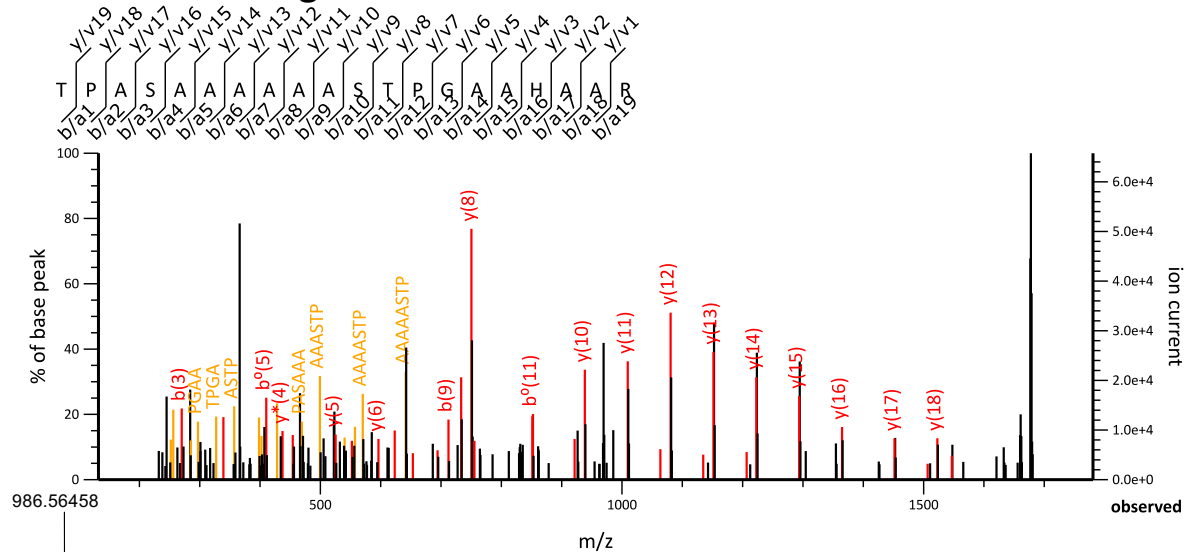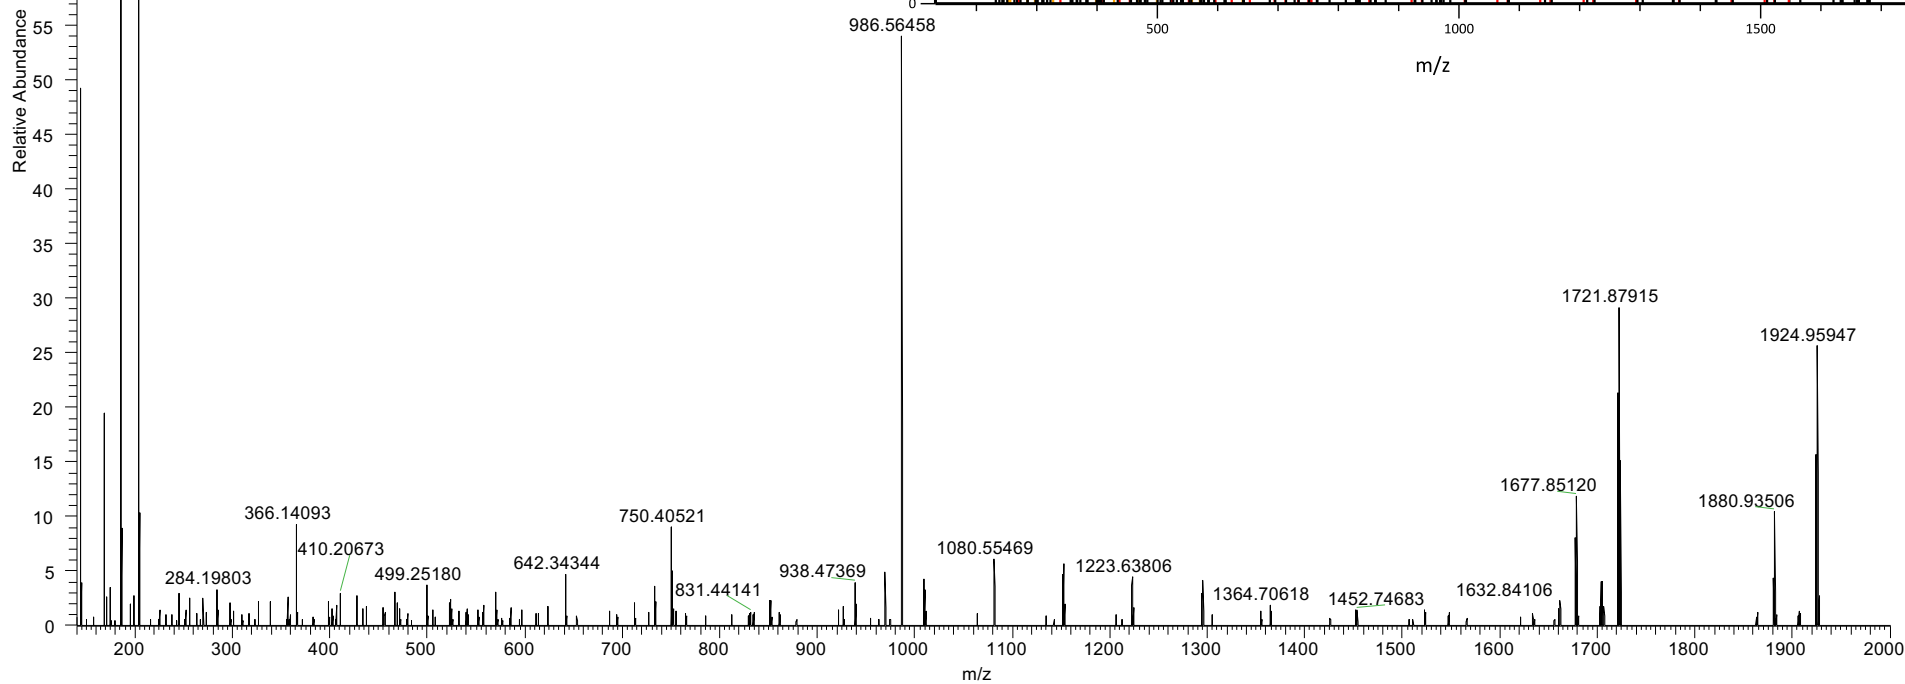

Supplement: supp_RA119.009671_153342_2_supp_366567_pv1sjg.pdf [file supp_RA119.009671_153342_2_supp_366567_pv1sjg.pdf]
