# Supplementary material
Source: PubMed Central journal article supplement (PMC6737235)

### Supplementary Data 4: Identified *Burkholderia pseudomallei* glycopeptides observed across strains

| Strain    | Gene     | Protein name              | Uniprot accession | m/z      | Charge | MH+       | Peptide mass | Glycan mass | Peptide sequence         | MASCOT ion Score | Page      |
|-----------|----------|---------------------------|-------------------|----------|--------|-----------|--------------|-------------|--------------------------|------------------|-----------|
| MSHR 831  | eco      | Ecotin                    | Q63W37            | 927.4486 | 3      | 2780.3298 | 2212.07      | 568.26      | ASASTPAAGADAASSPKPAVEDIK | 89               | 2 and 3   |
| MSHR 1967 | eco      | Ecotin                    | Q63W37            | 927.4494 | 3      | 2780.3323 | 2212.07      | 568.26      | ASASTPAAGADAASSPKPAVEDIK | 74               | 4 and 5   |
| MSHR 1824 | eco      | Ecotin                    | Q63W37            | 927.4500 | 3      | 2780.3342 | 2212.07      | 568.26      | ASASTPAAGADAASSPKPAVEDIK | 75               | 6 and 7   |
| MSHR 715  | eco      | Ecotin                    | Q63W37            | 927.4468 | 3      | 2780.3246 | 2212.07      | 568.26      | ASASTPAAGADAASSPKPAVEDIK | 74               | 8 and 9   |
| MSHR 8582 | eco      | Ecotin                    | Q63W37            | 927.4498 | 3      | 2780.3336 | 2212.07      | 568.26      | ASASTPAAGADAASSPKPAVEDIK | 97               | 10 and 11 |
| MSHR 9219 | BPSL3095 | Putative membrane protein | Q63QC8            | 813.8766 | 2      | 1626.7524 | 1058.52      | 568.23      | PAVAASAGDGSR             | 27               | 12 and 13 |
| MSHR 9219 | eco      | Ecotin                    | Q63W37            | 927.4515 | 3      | 2780.3530 | 2212.11      | 568.24      | ASASTPAAGADAASSPKPAVEDIK | 100              | 14 and 15 |
| MSHR 9138 | eco      | Ecotin                    | Q63W37            | 927.4515 | 3      | 2780.3530 | 2212.11      | 568.24      | ASASTPAAGADAASSPKPAVEDIK | 80               | 16 and 17 |
| MSHR 9443 | -        | -                         | -                 | 742.3361 | 2      | 1483.6714 | 815.43       | 668.25      | AEAASAPAK                | 25               | 18 and 19 |
| MSHR 9443 | eco      | Ecotin                    | Q63W37            | 927.4524 | 3      | 2780.3556 | 2212.11      | 568.25      | ASASTPAAGADAASSPKPAVEDIK | 117              | 20 and 21 |

**Supplementary Data 4. Identified *Burkholderia pseudomallei* Glycopeptides observed across strains.** A total of 10 unique glycopeptides were observed within whole cell proteome samples of *B. pseudomallei*. For assigned glycopeptides the *B. pseudomallei* strain, gene, protein name, uniprot accession (mapped to *B. pseudomallei* K96243), observed m/z, charge state, MH+ mass, peptide mass, glycan, peptide sequence, MASCOT ion score and containing annotated CID and HCD data are provided.

# ITMS-CID

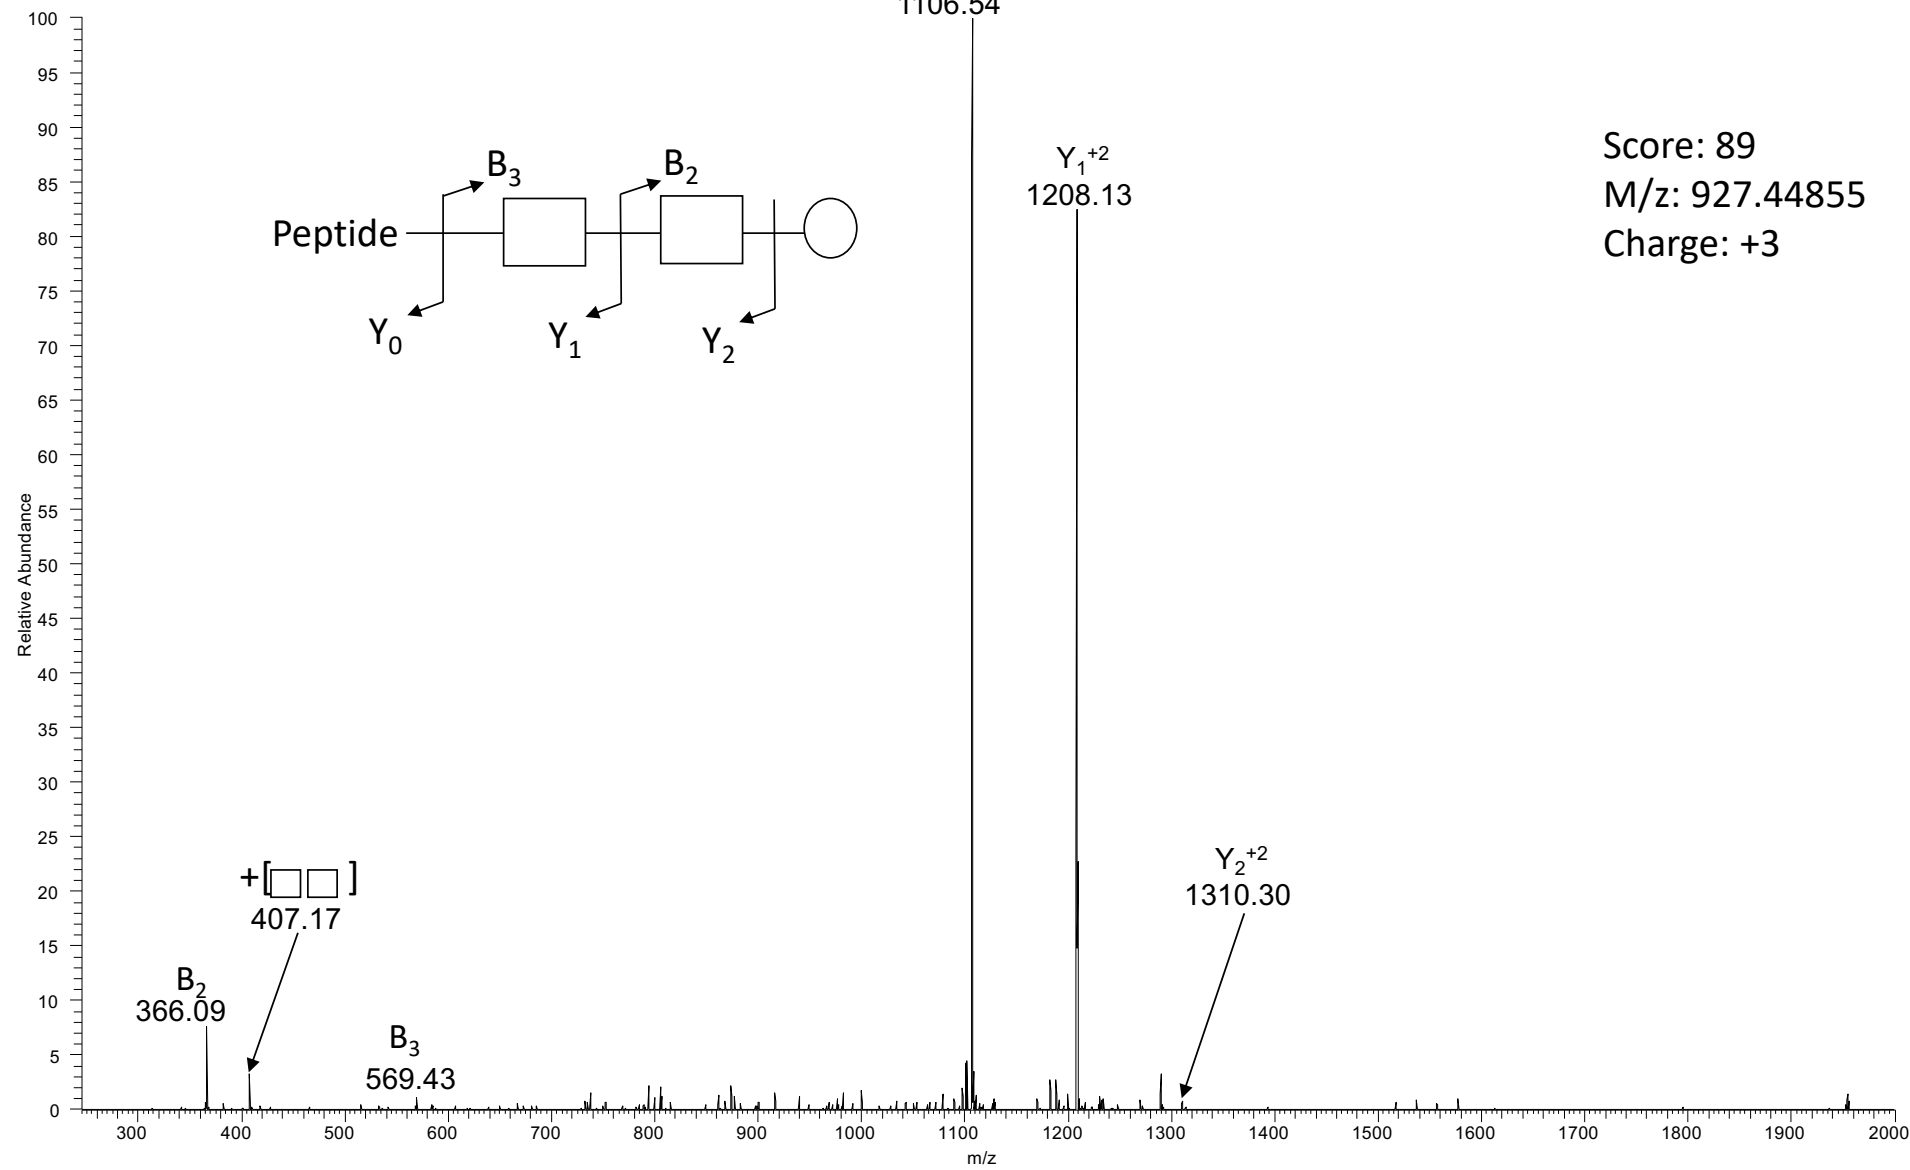

Score: 89

M/z: 927.44855

Charge: +3

FTMS-HCD

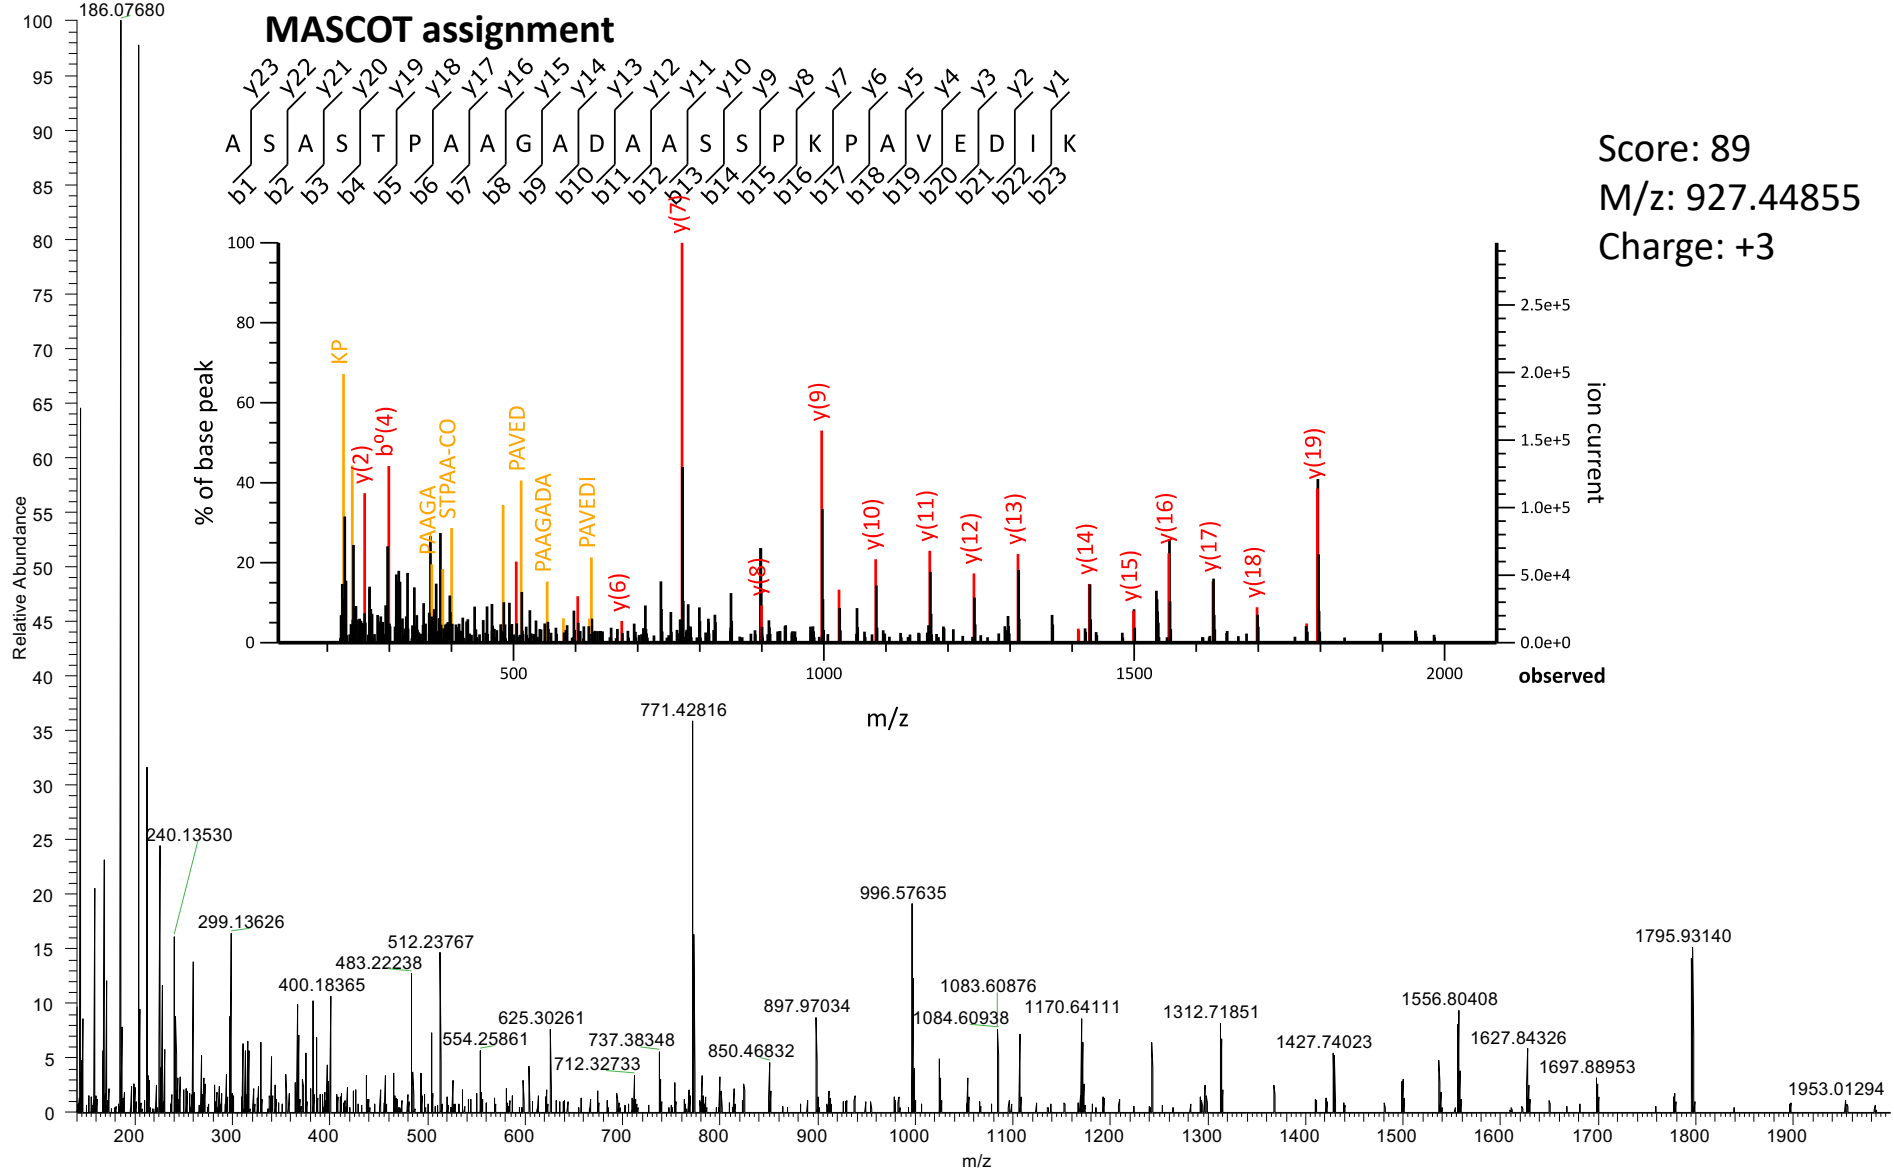

# ITMS-CID

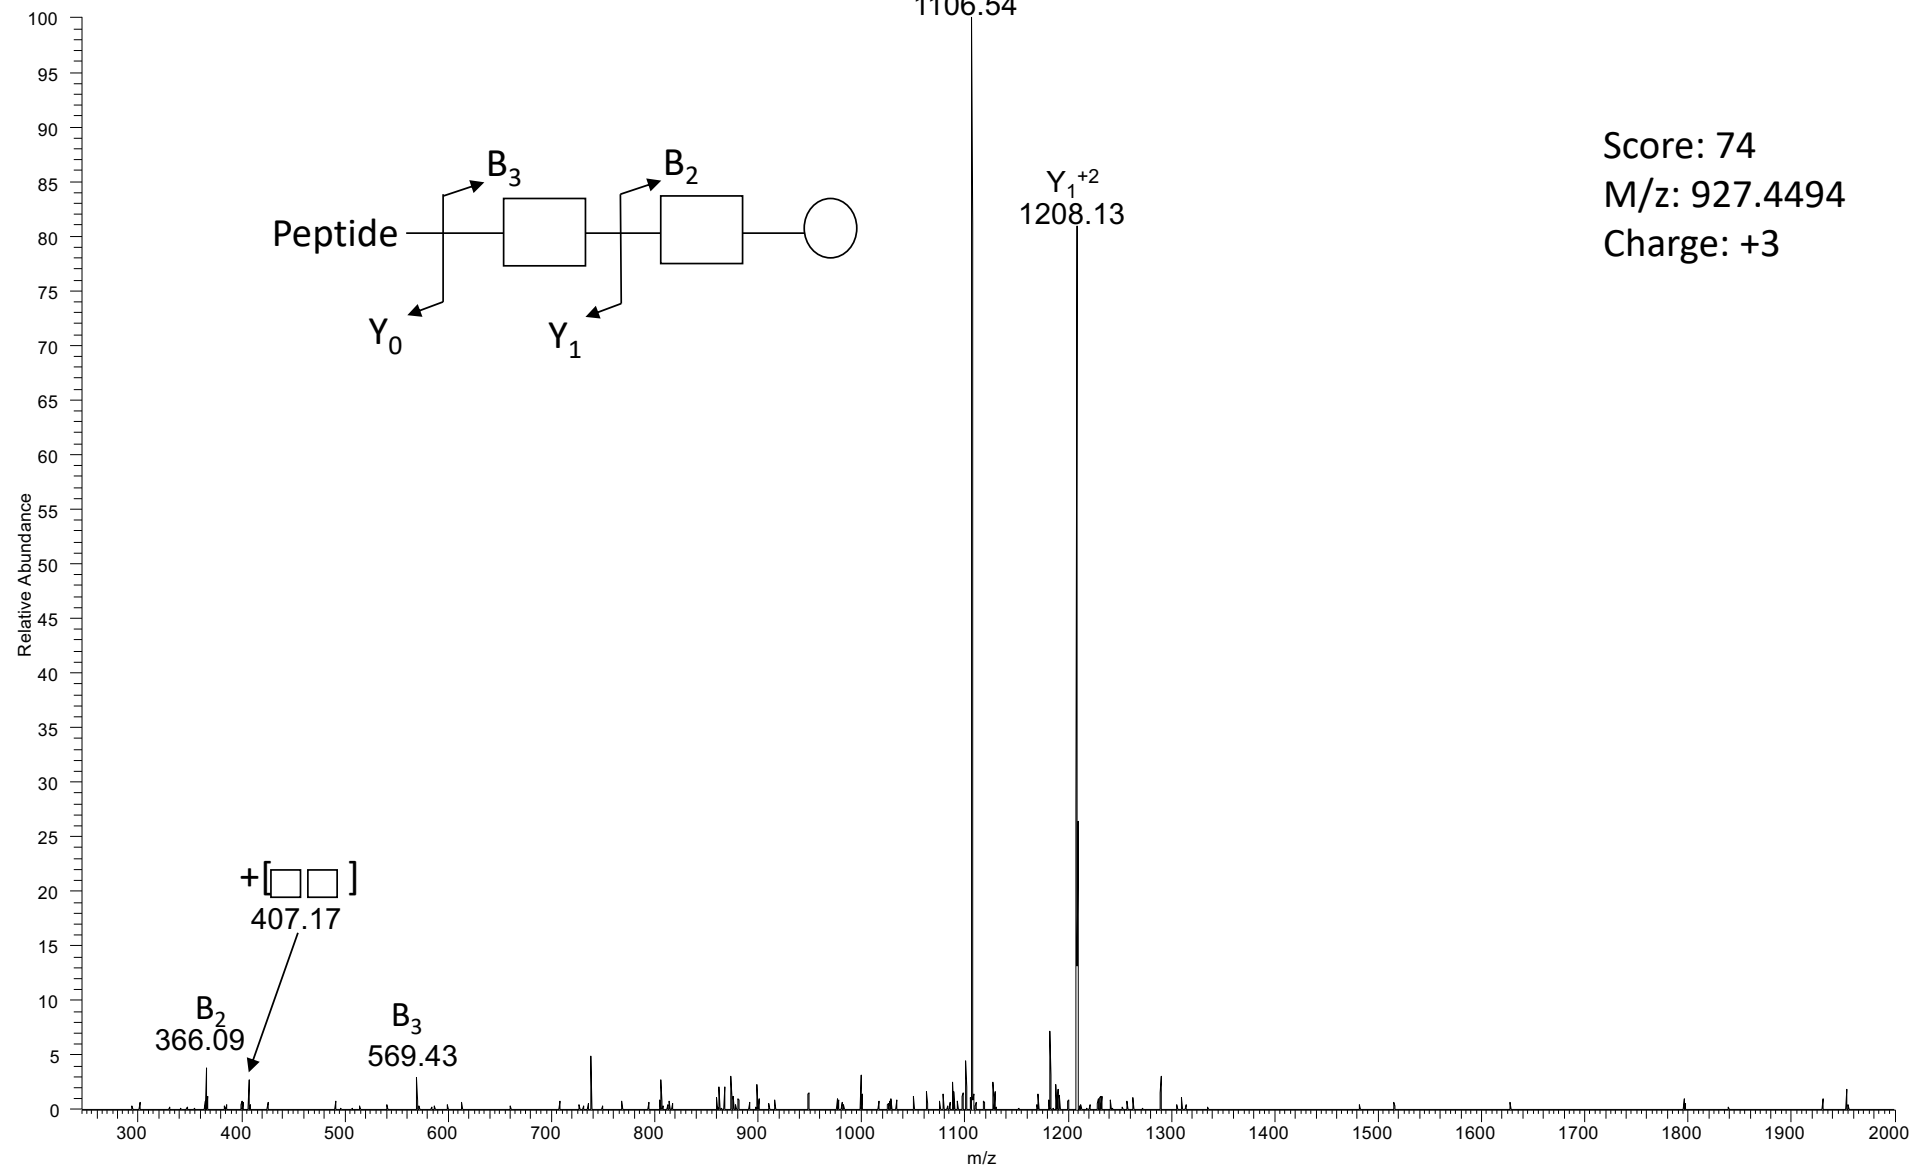

Score: 74

M/z: 927.4494

Charge: +3

FTMS-HCD

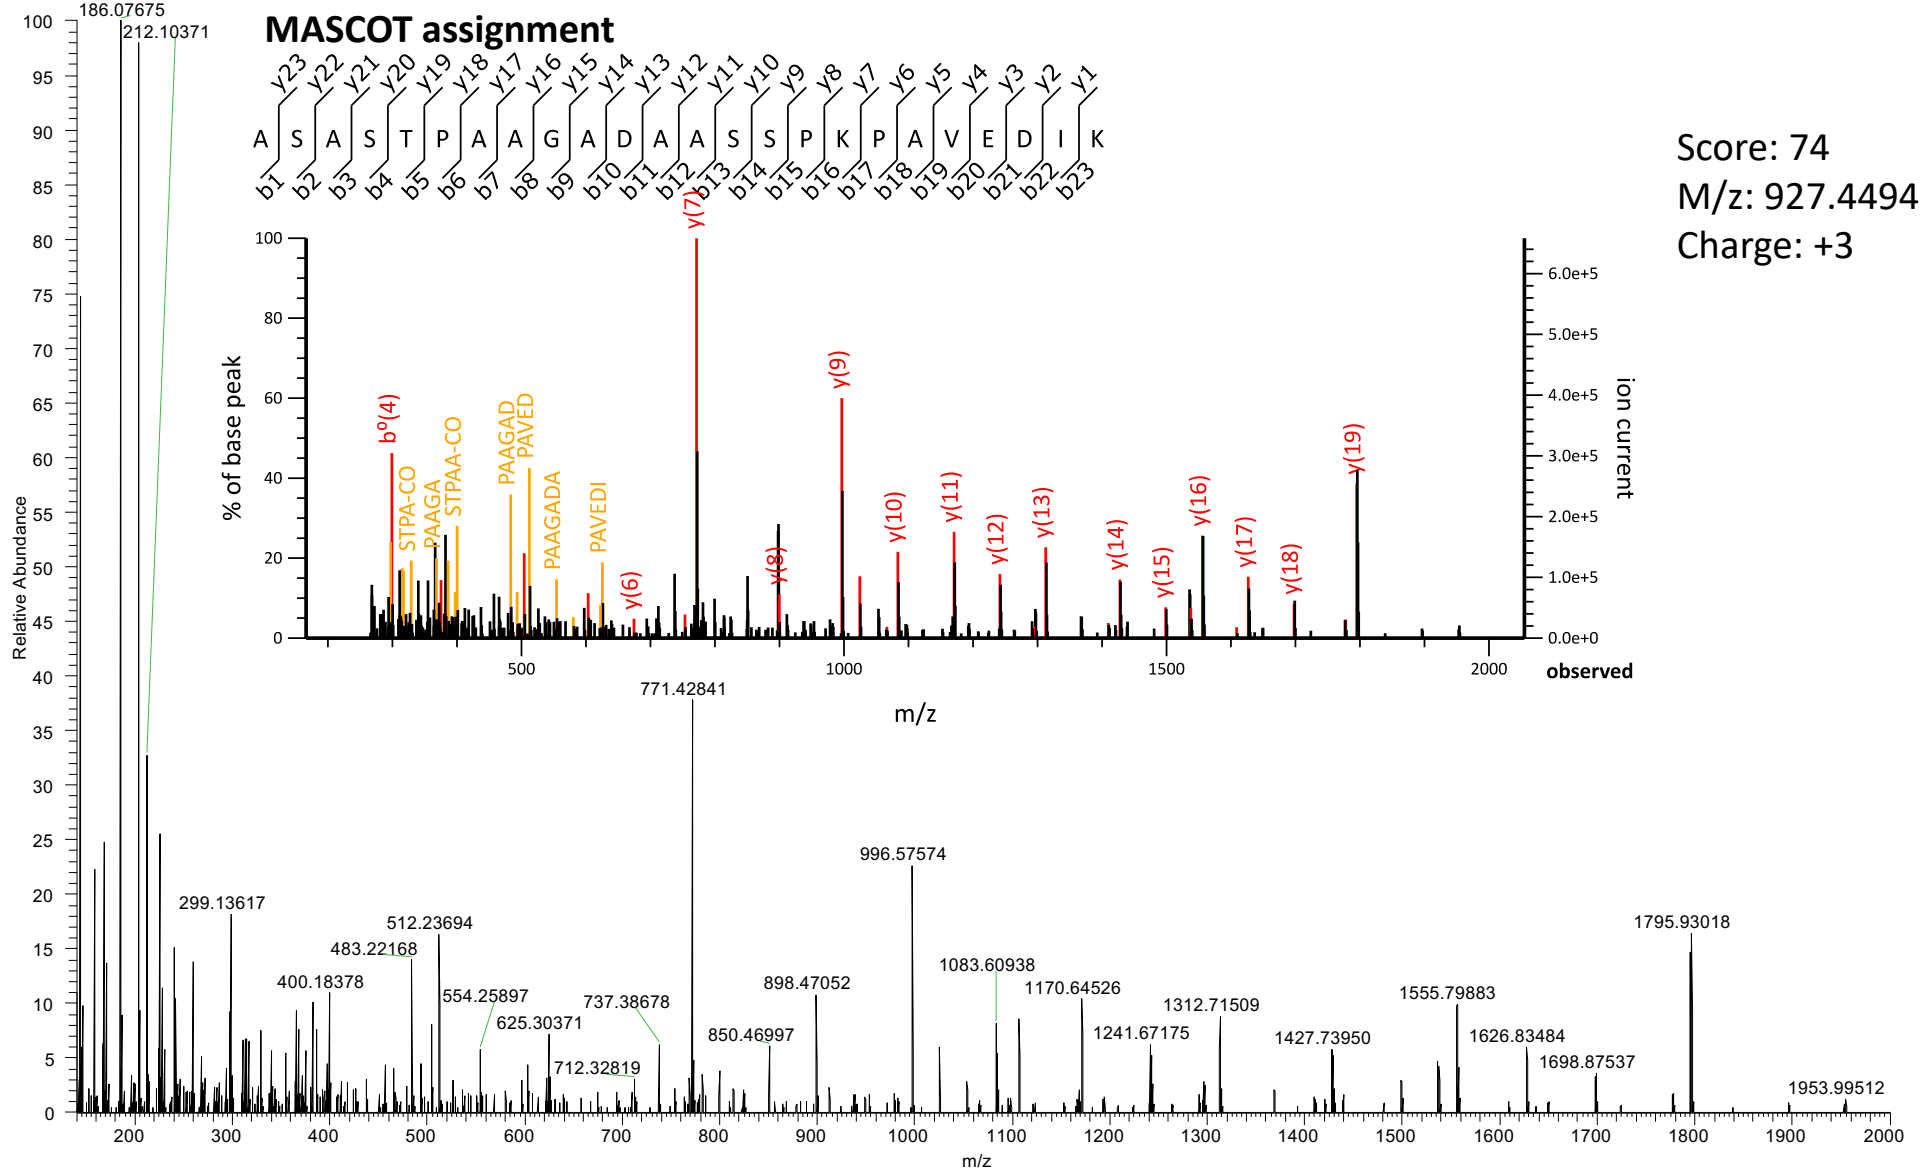

Score: 74  
 M/z: 927.4494  
 Charge: +3

# ITMS-CID

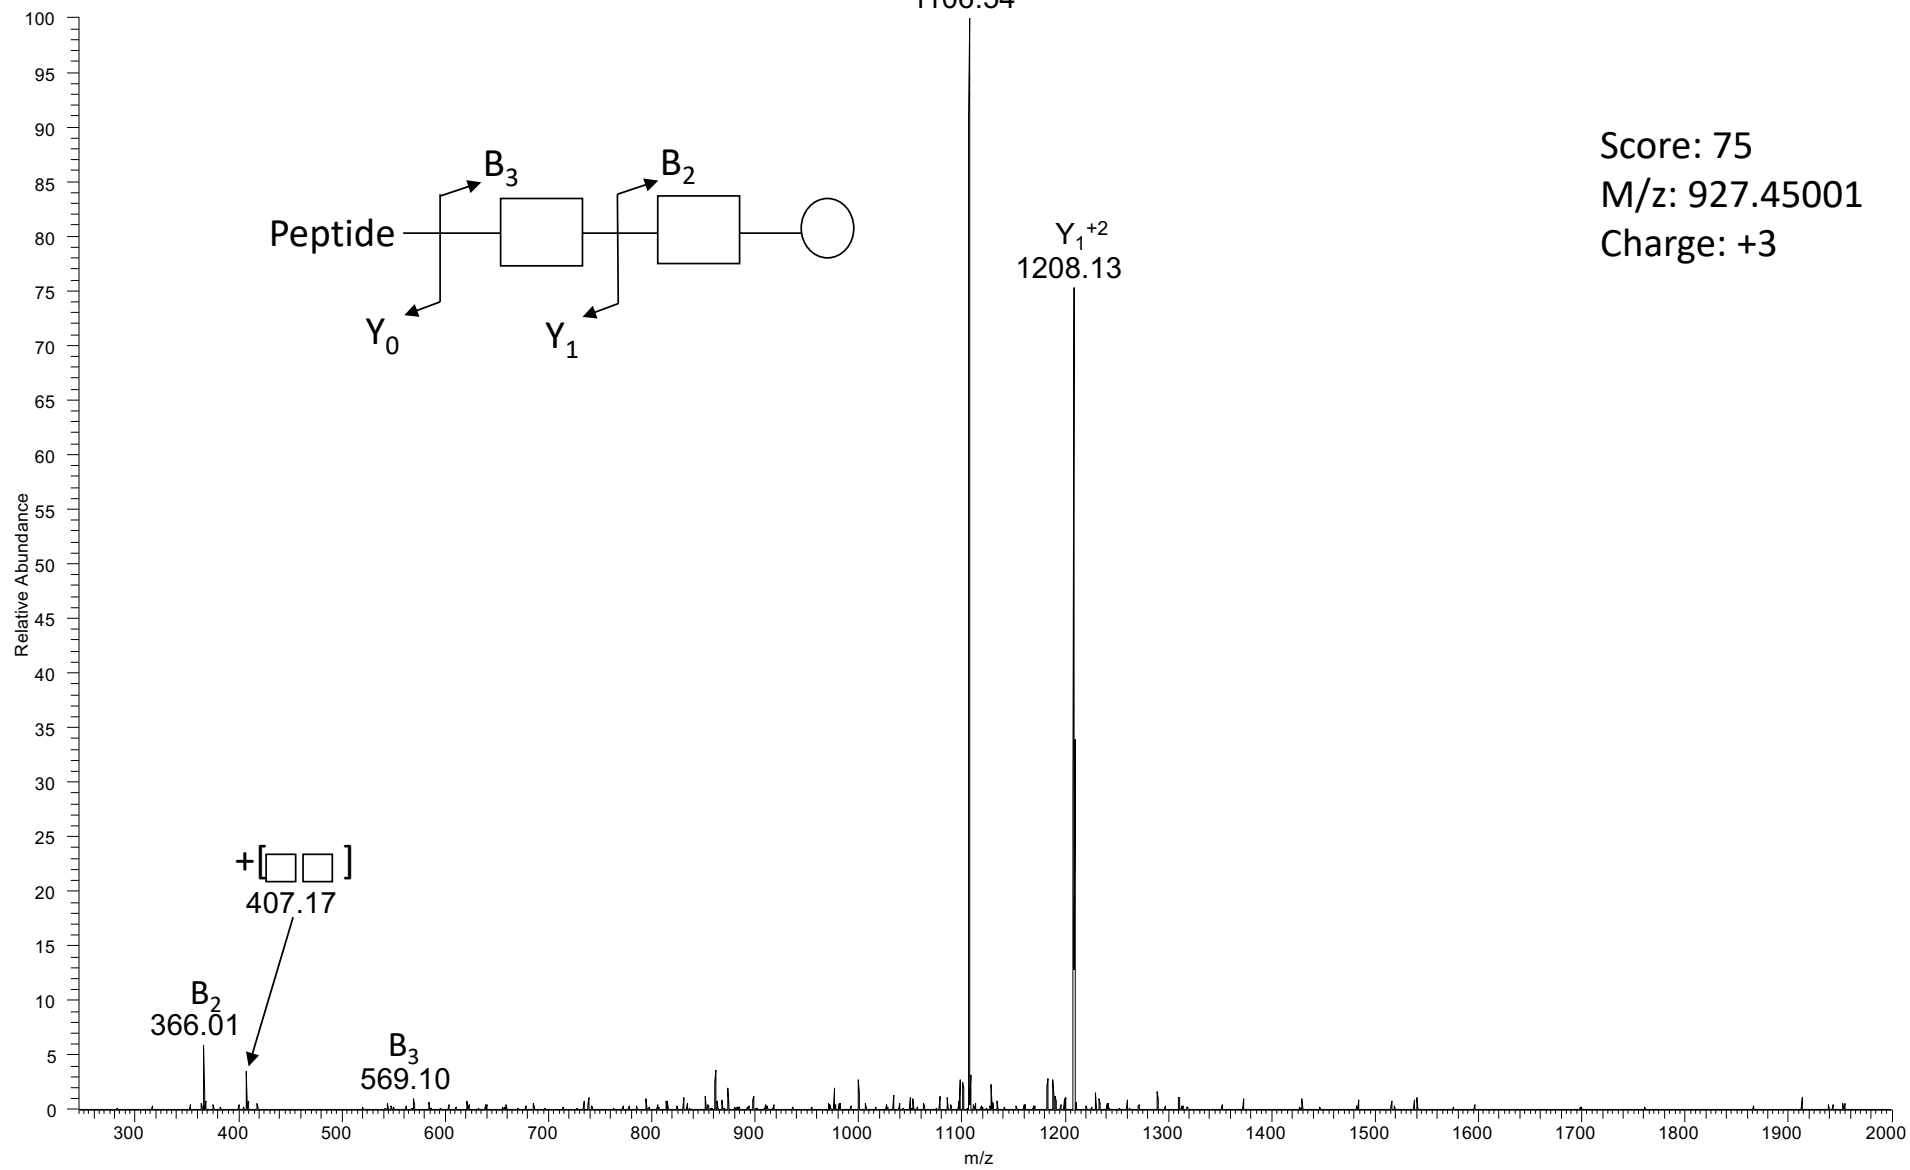

Score: 75

M/z: 927.45001

Charge: +3

FTMS-HCD

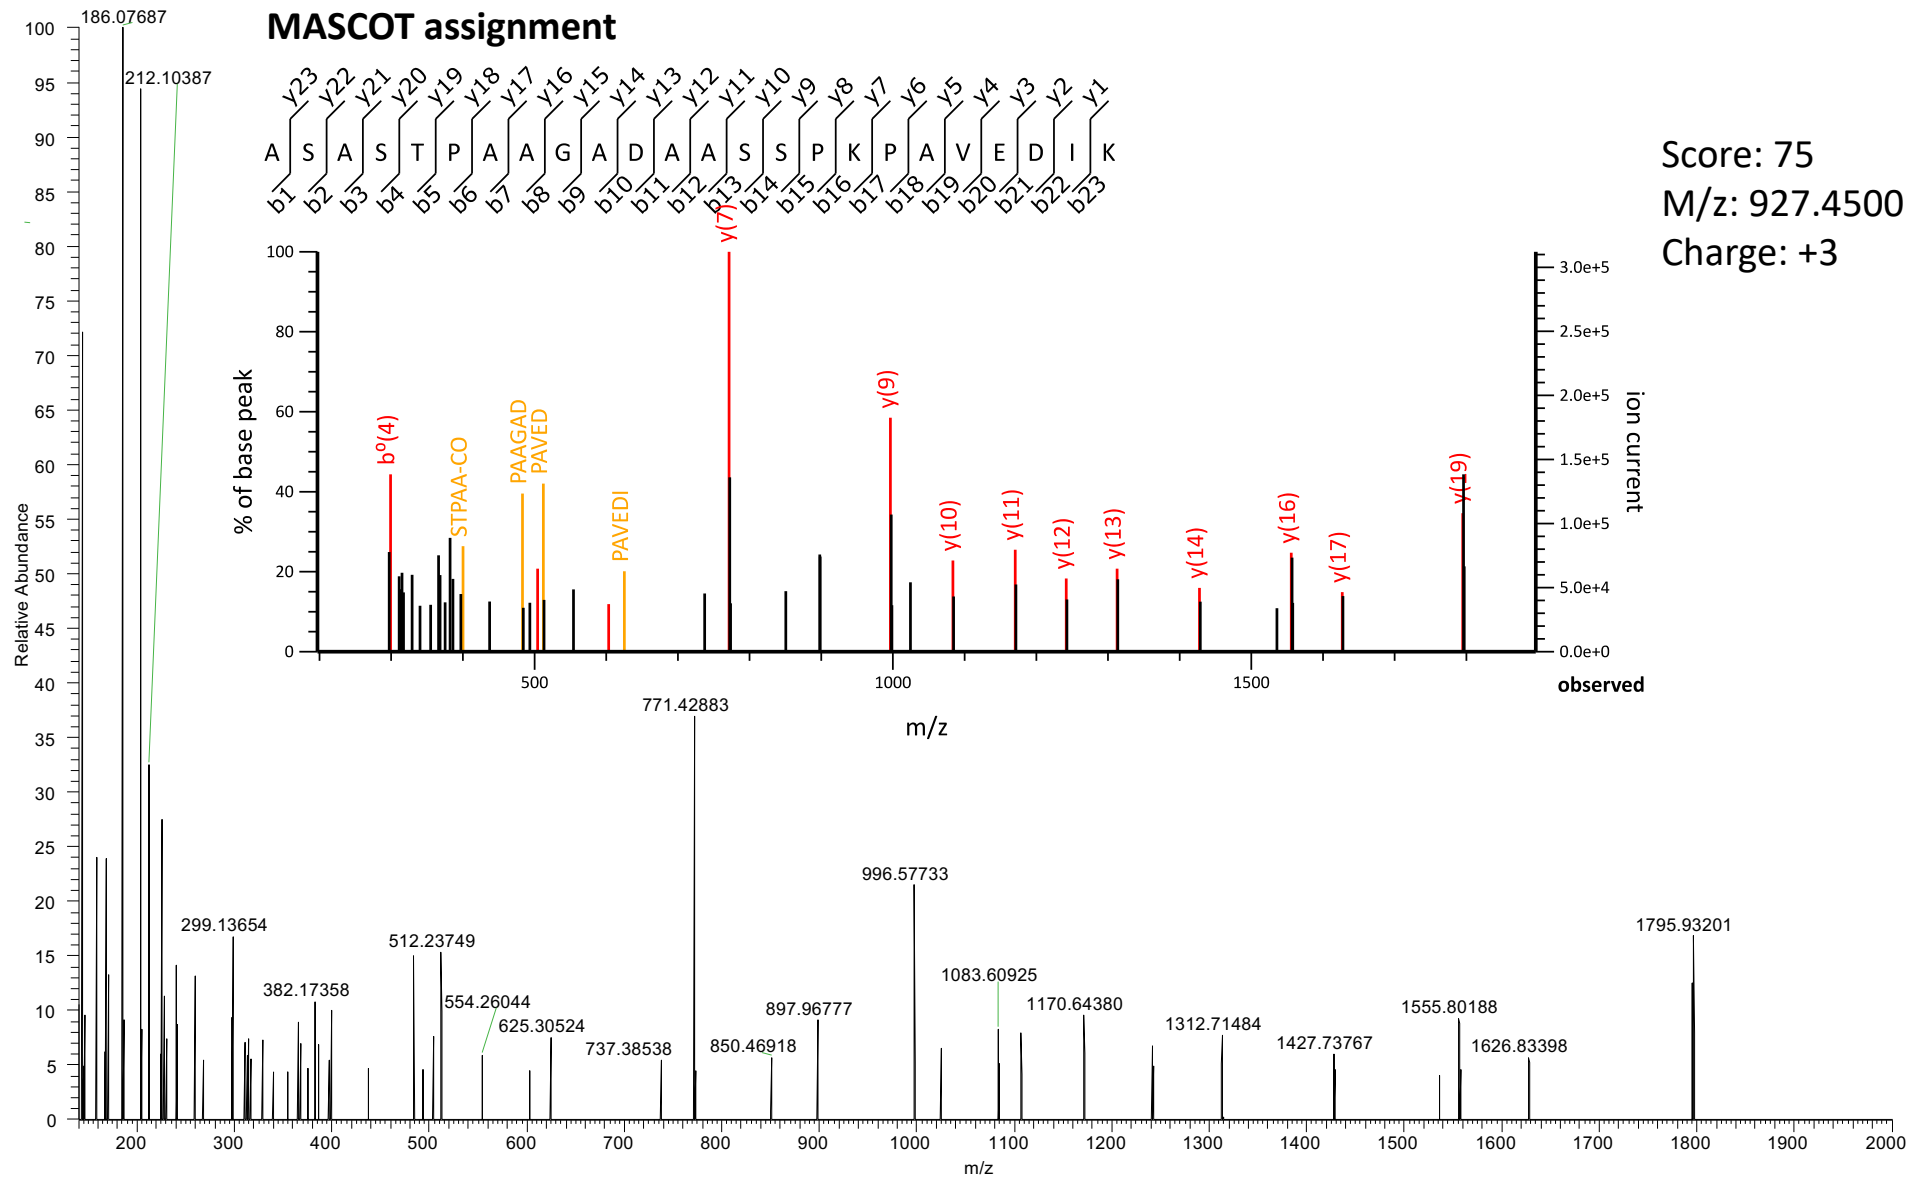

# ITMS-CID

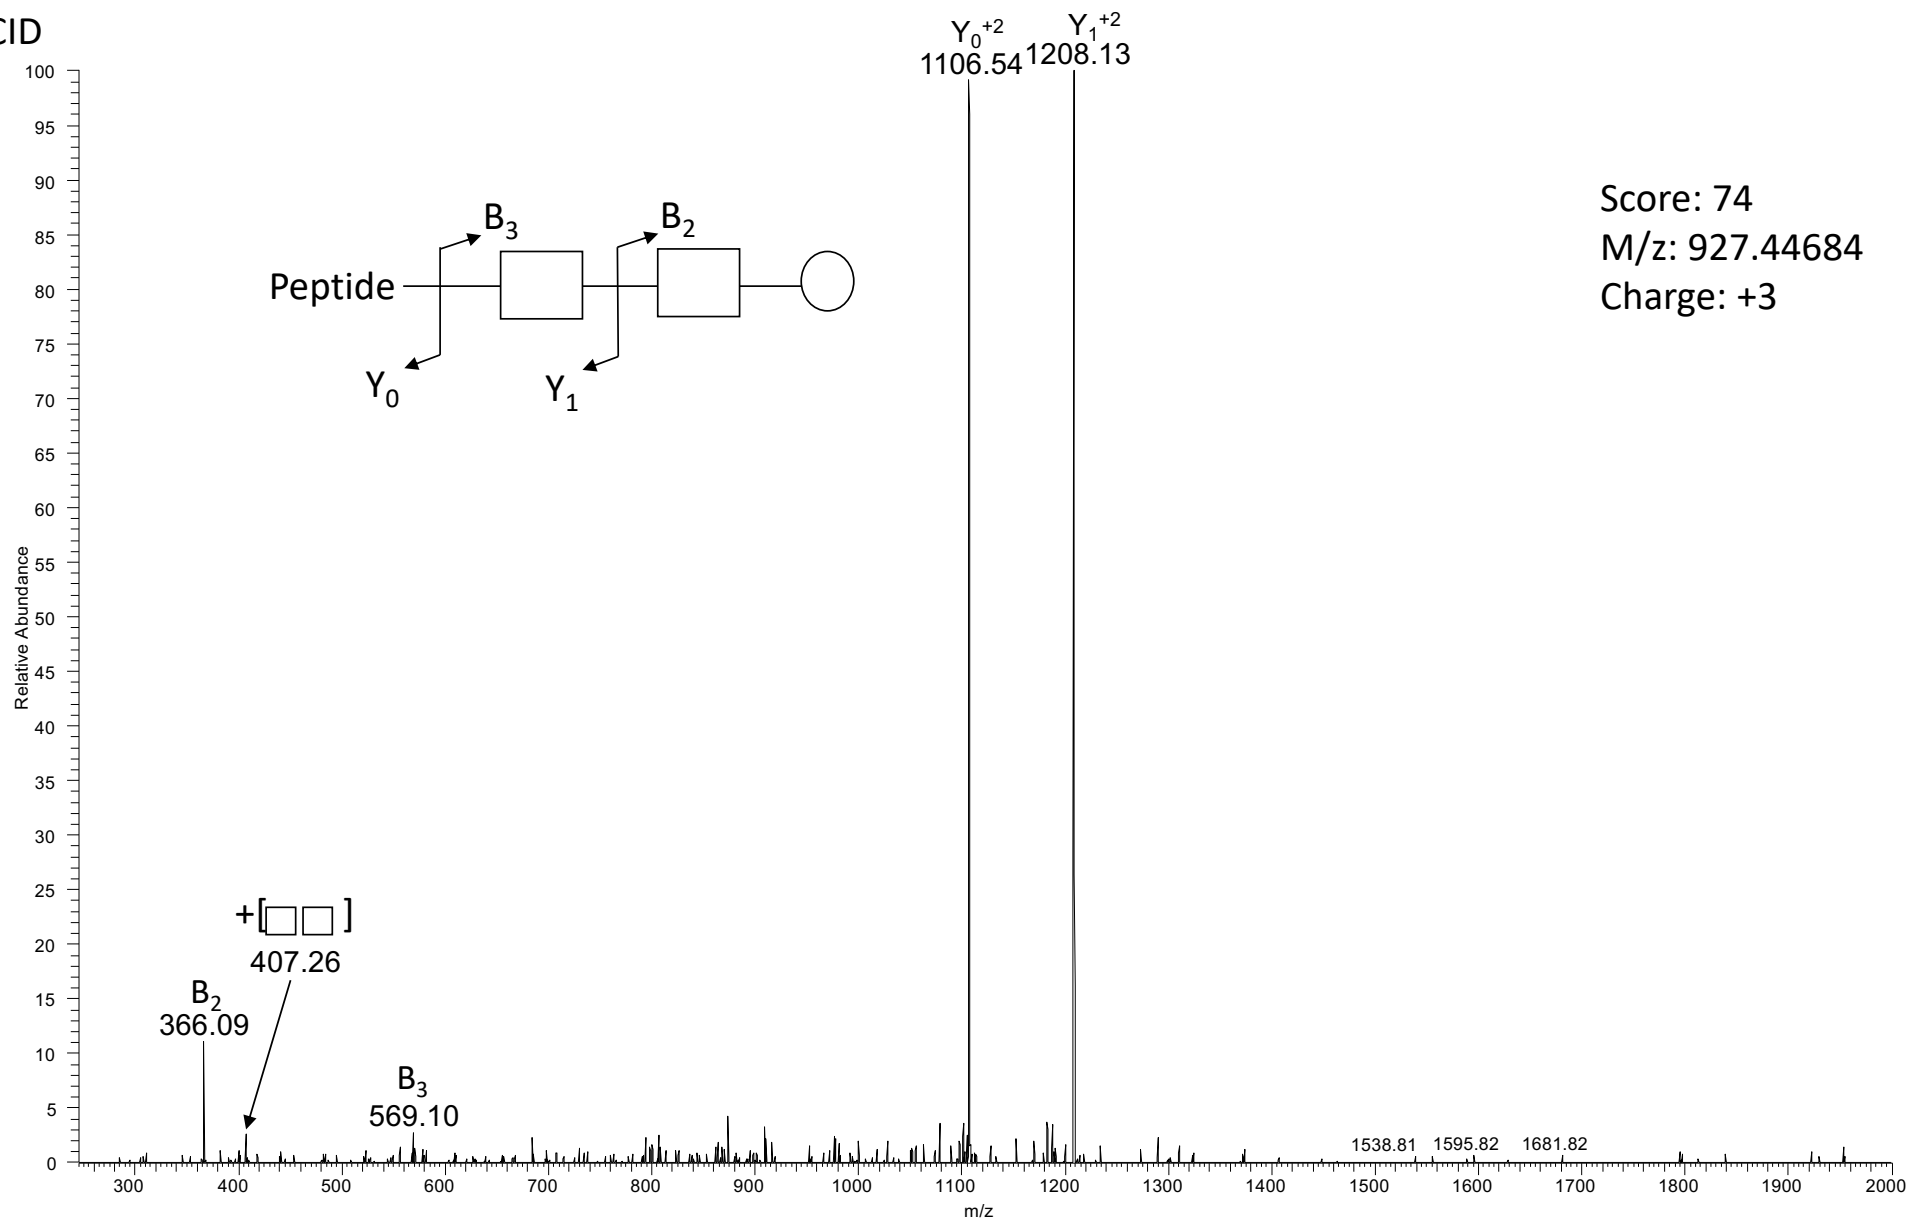

Score: 74

M/z: 927.44684

Charge: +3



FTMS-HCD

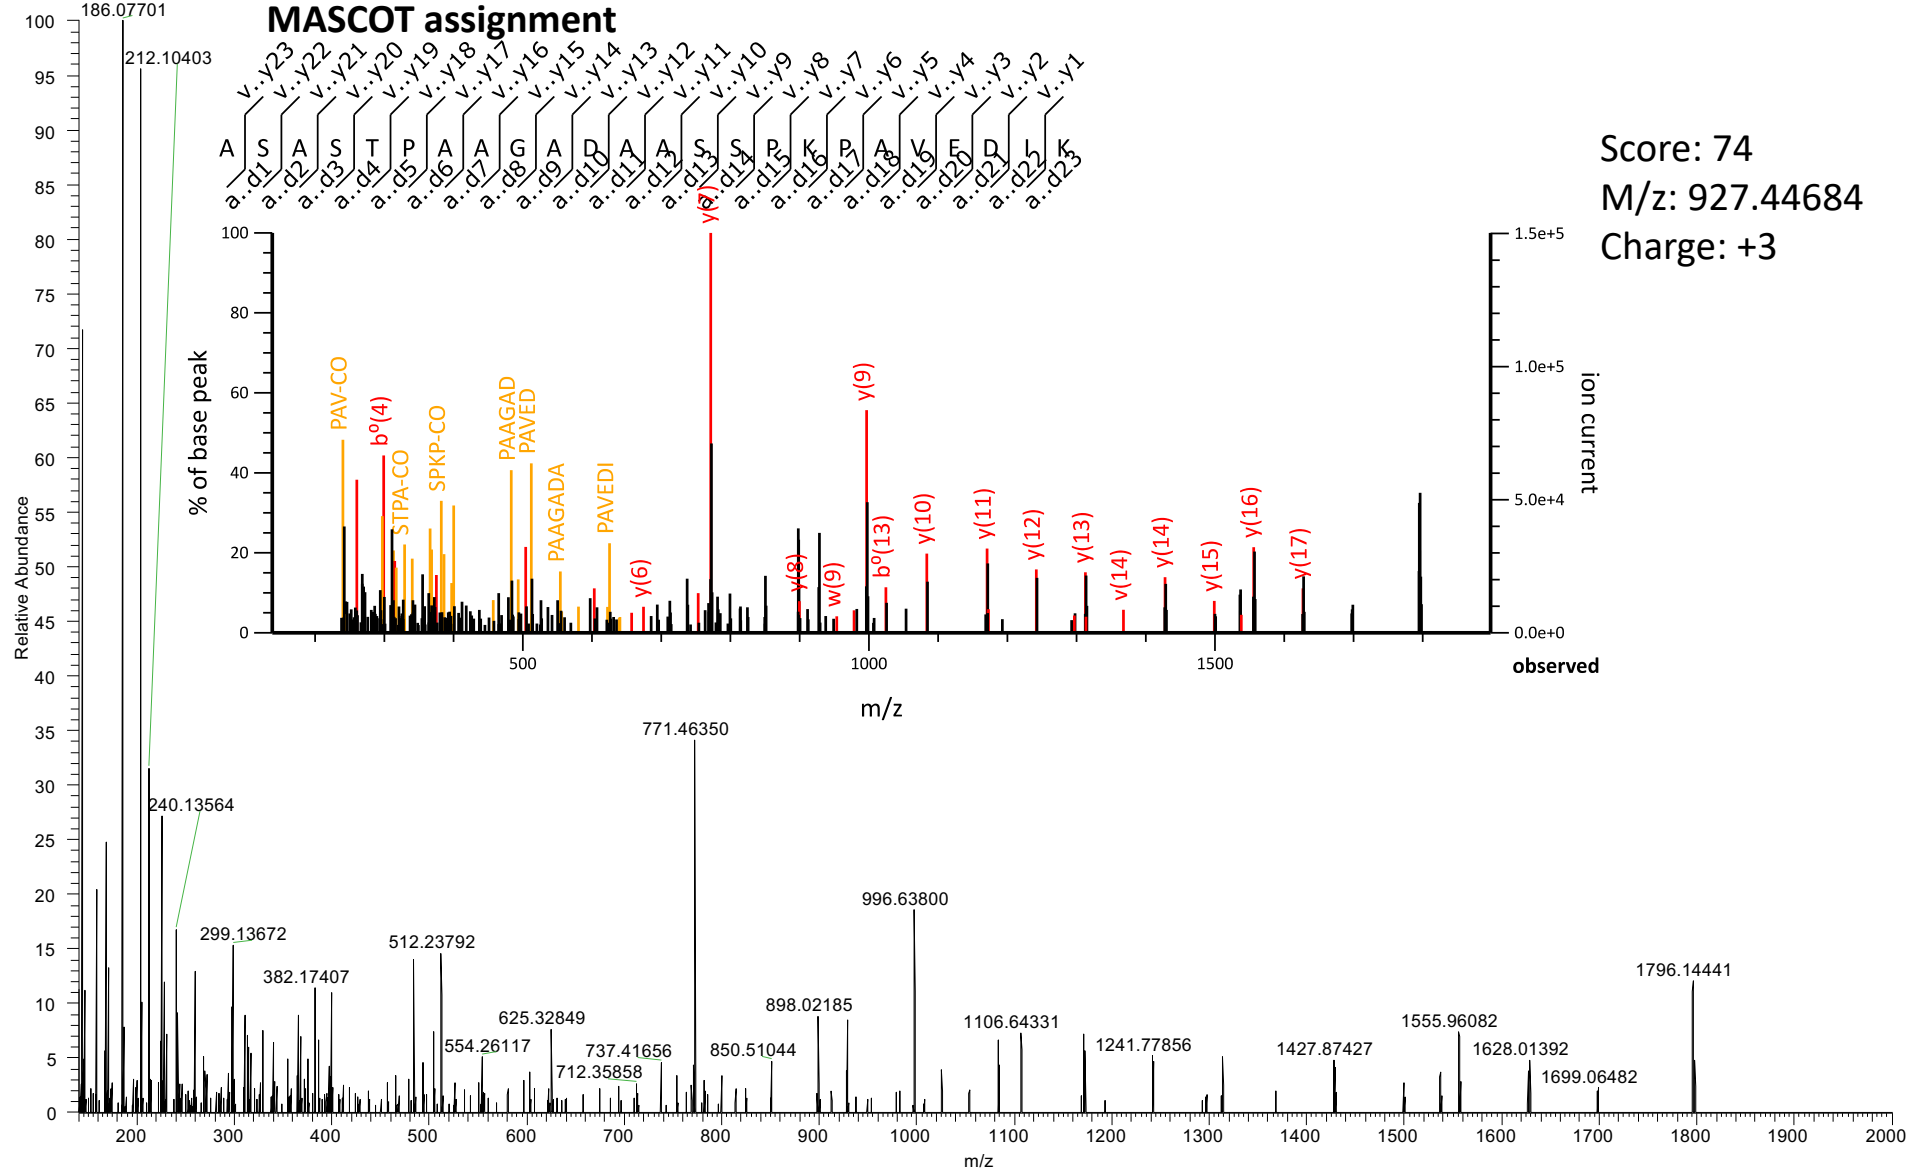

# ITMS-CID

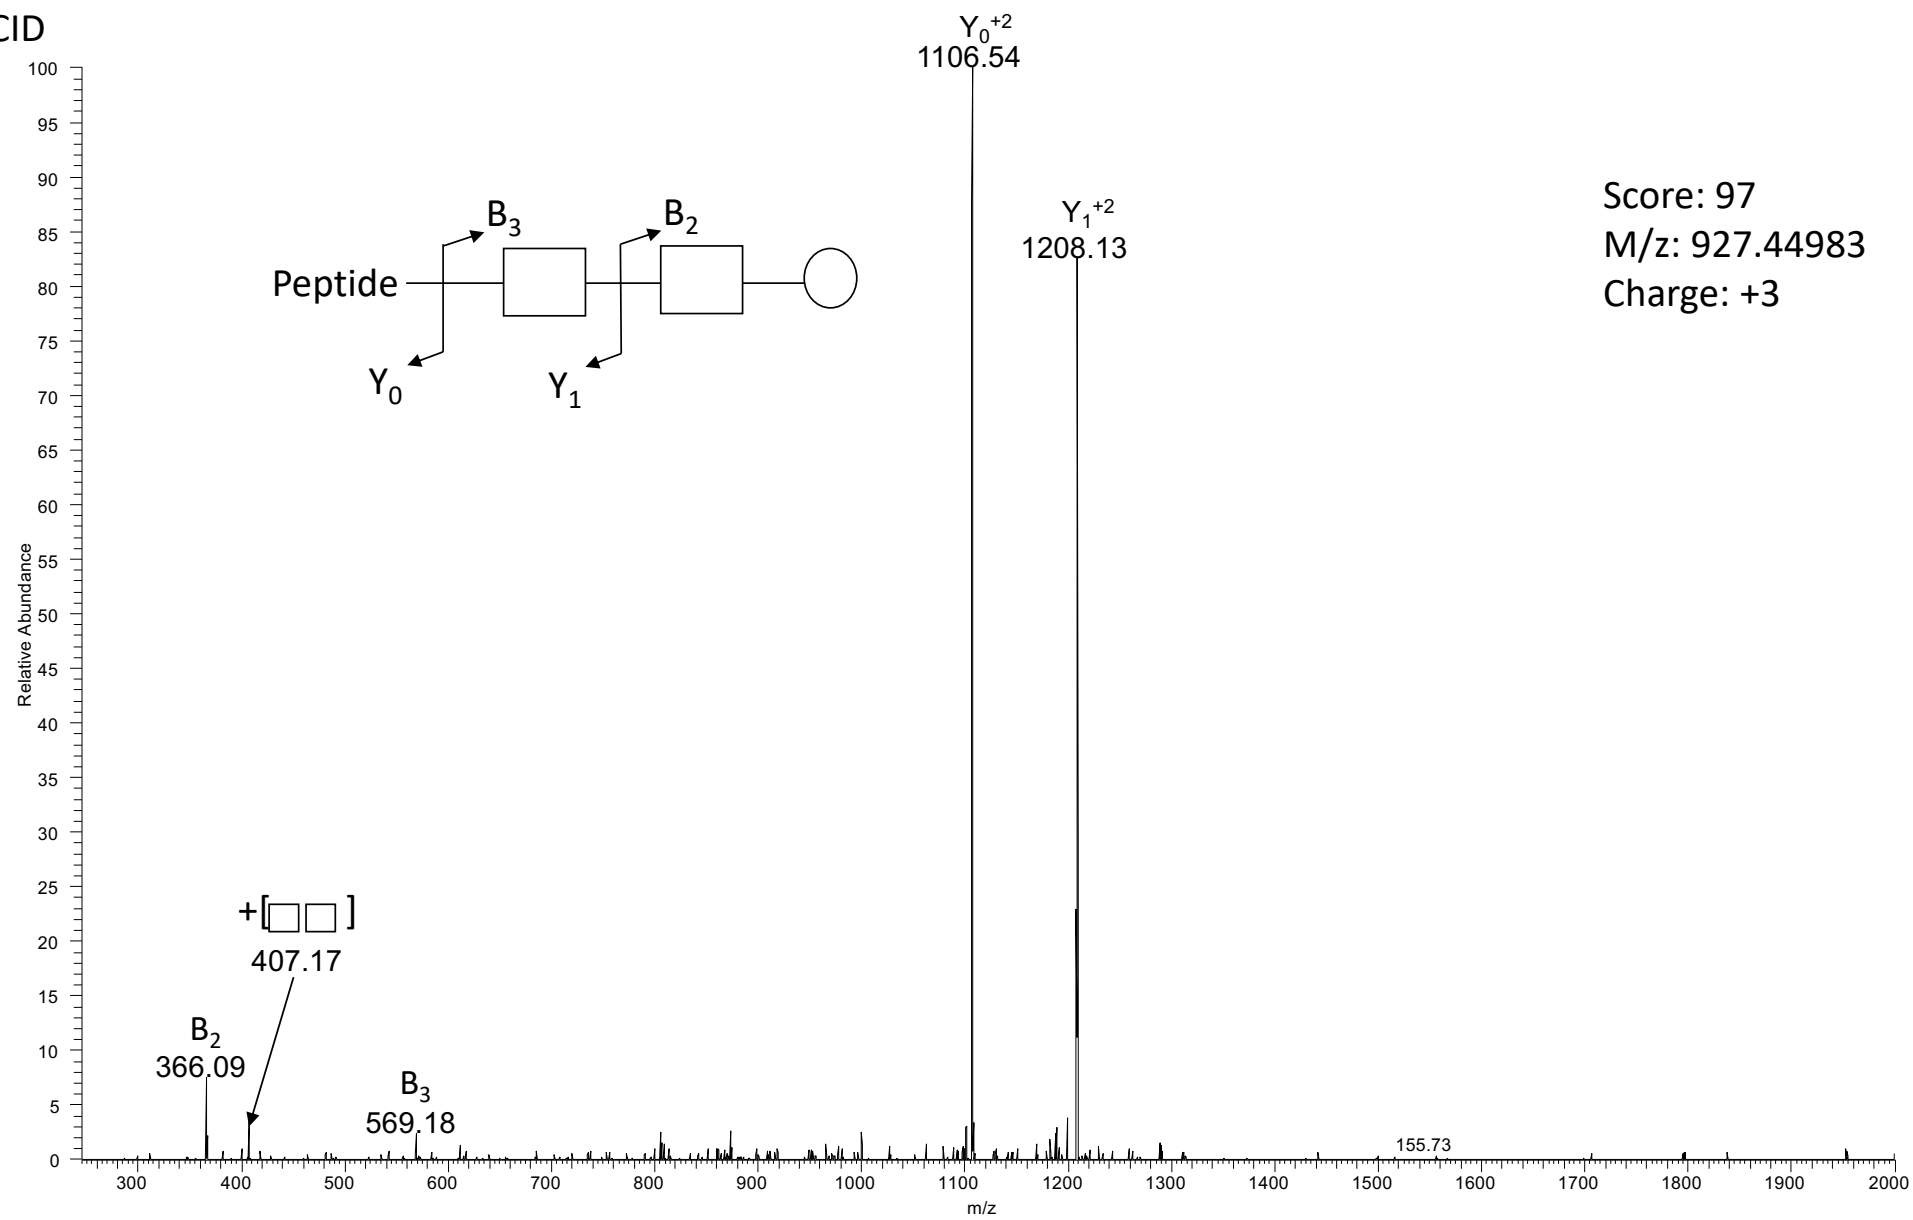

Score: 97  
M/z: 927.44983  
Charge: +3

FTMS-HCD

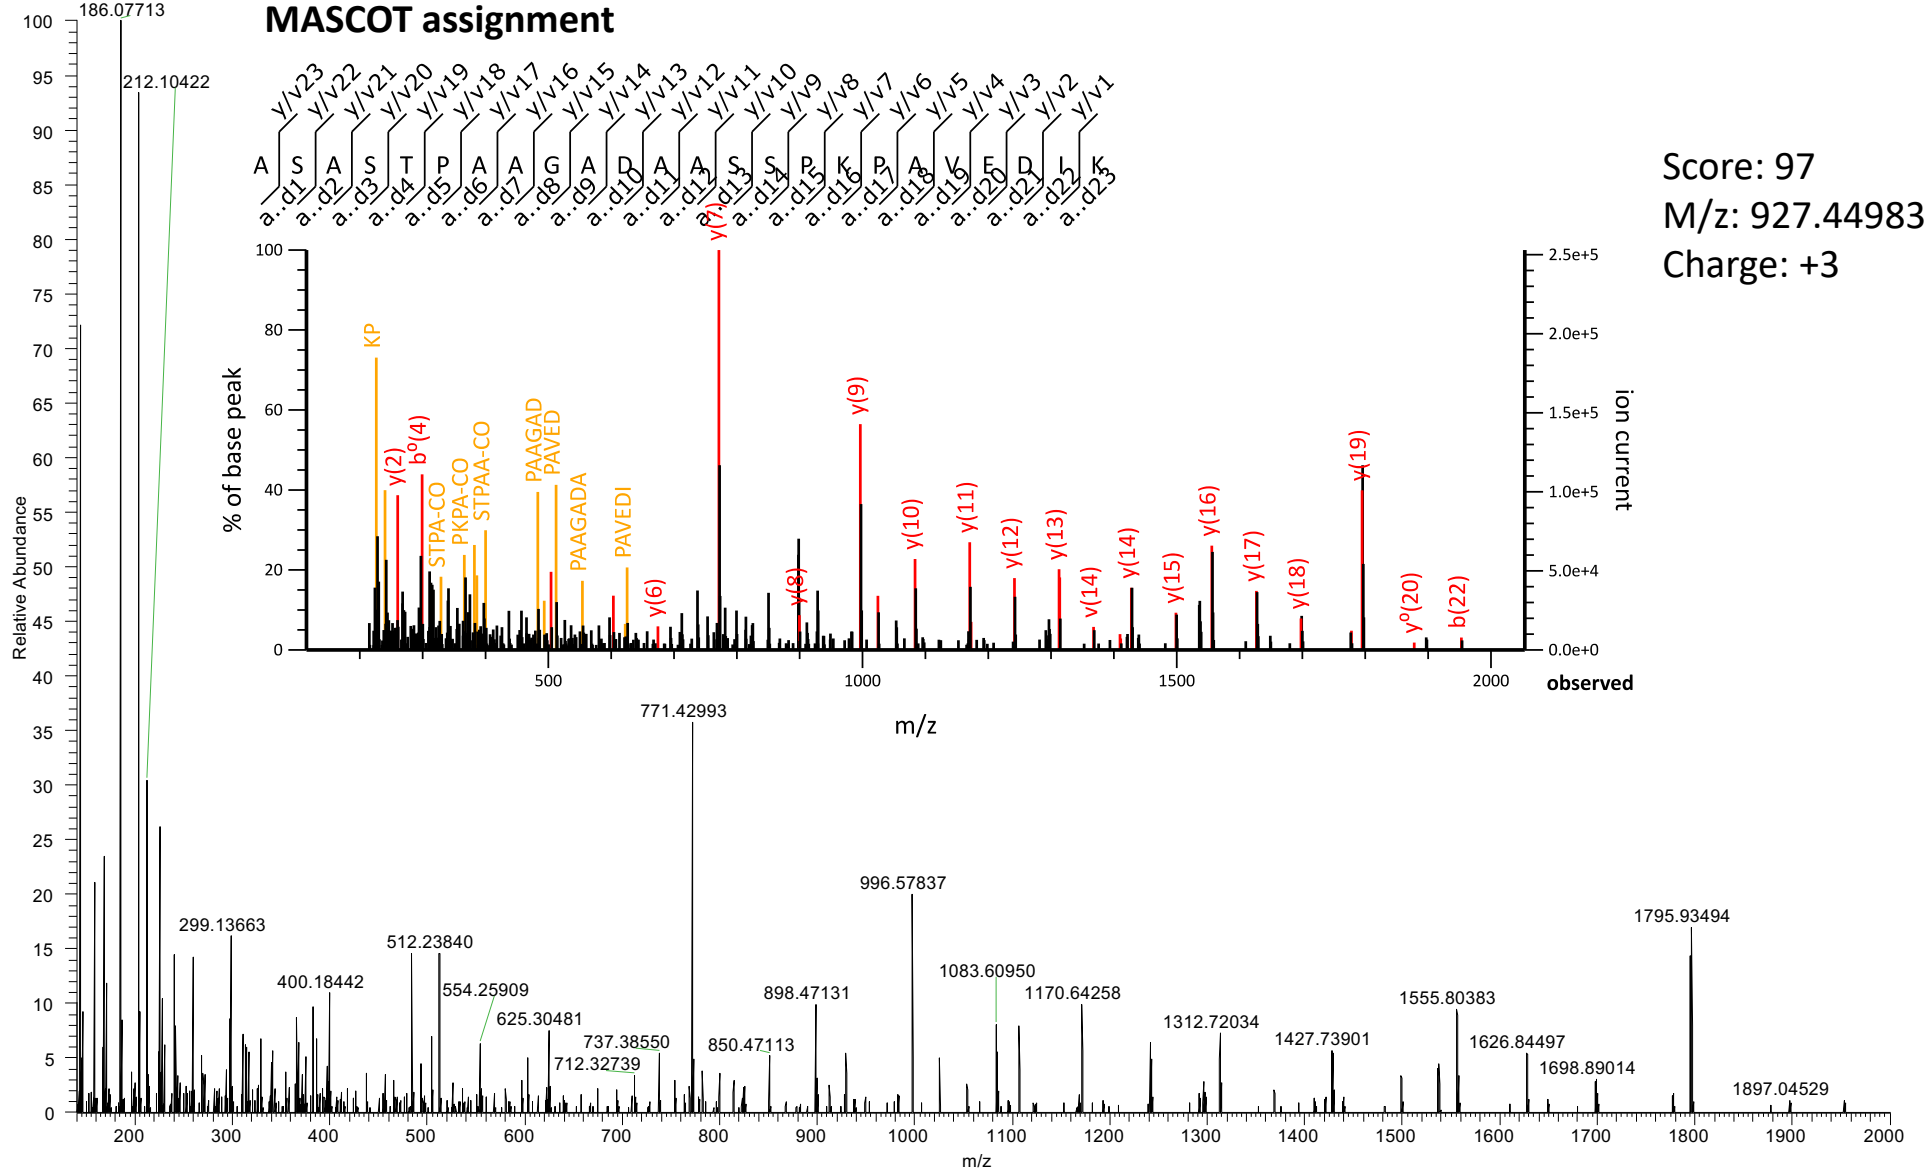

# ITMS-CID

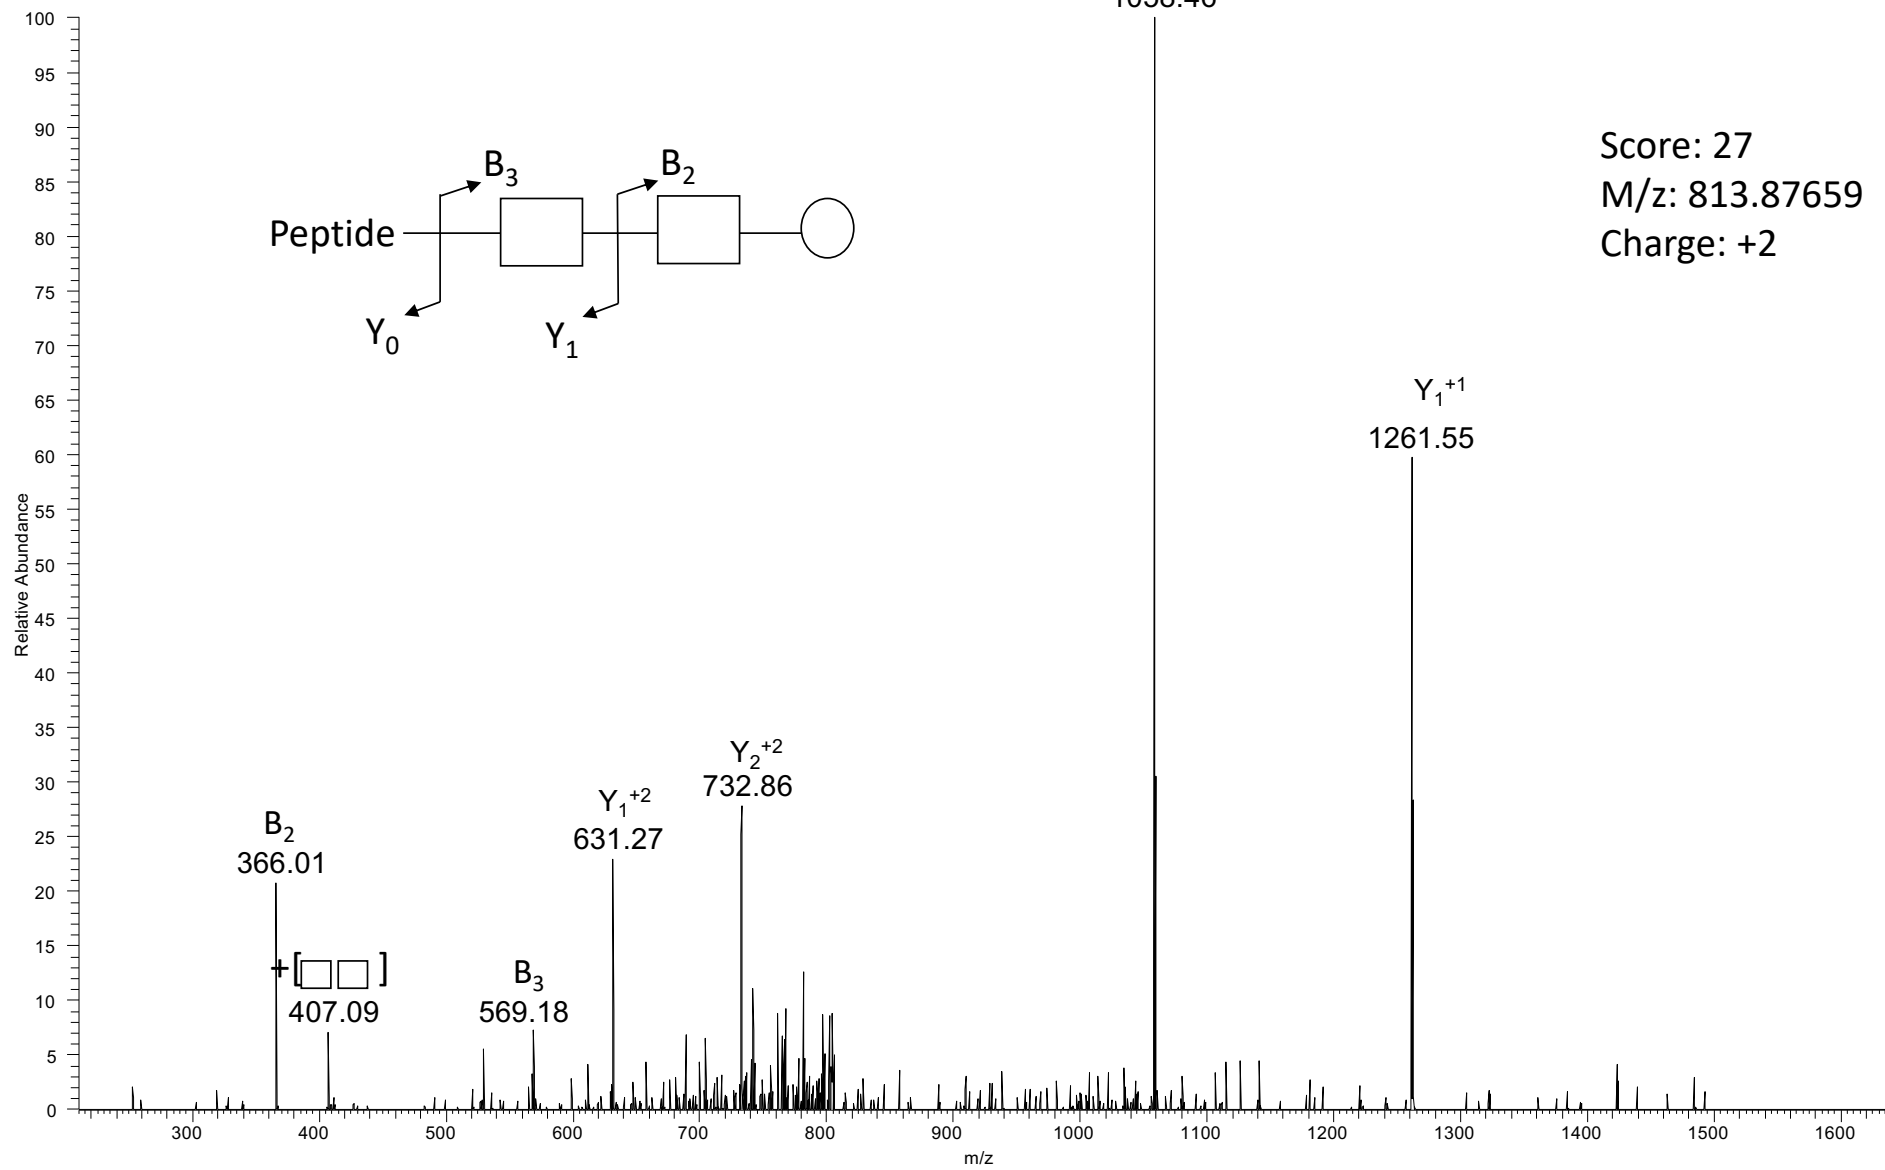

Score: 27  
M/z: 813.87659  
Charge: +2

FTMS-HCD

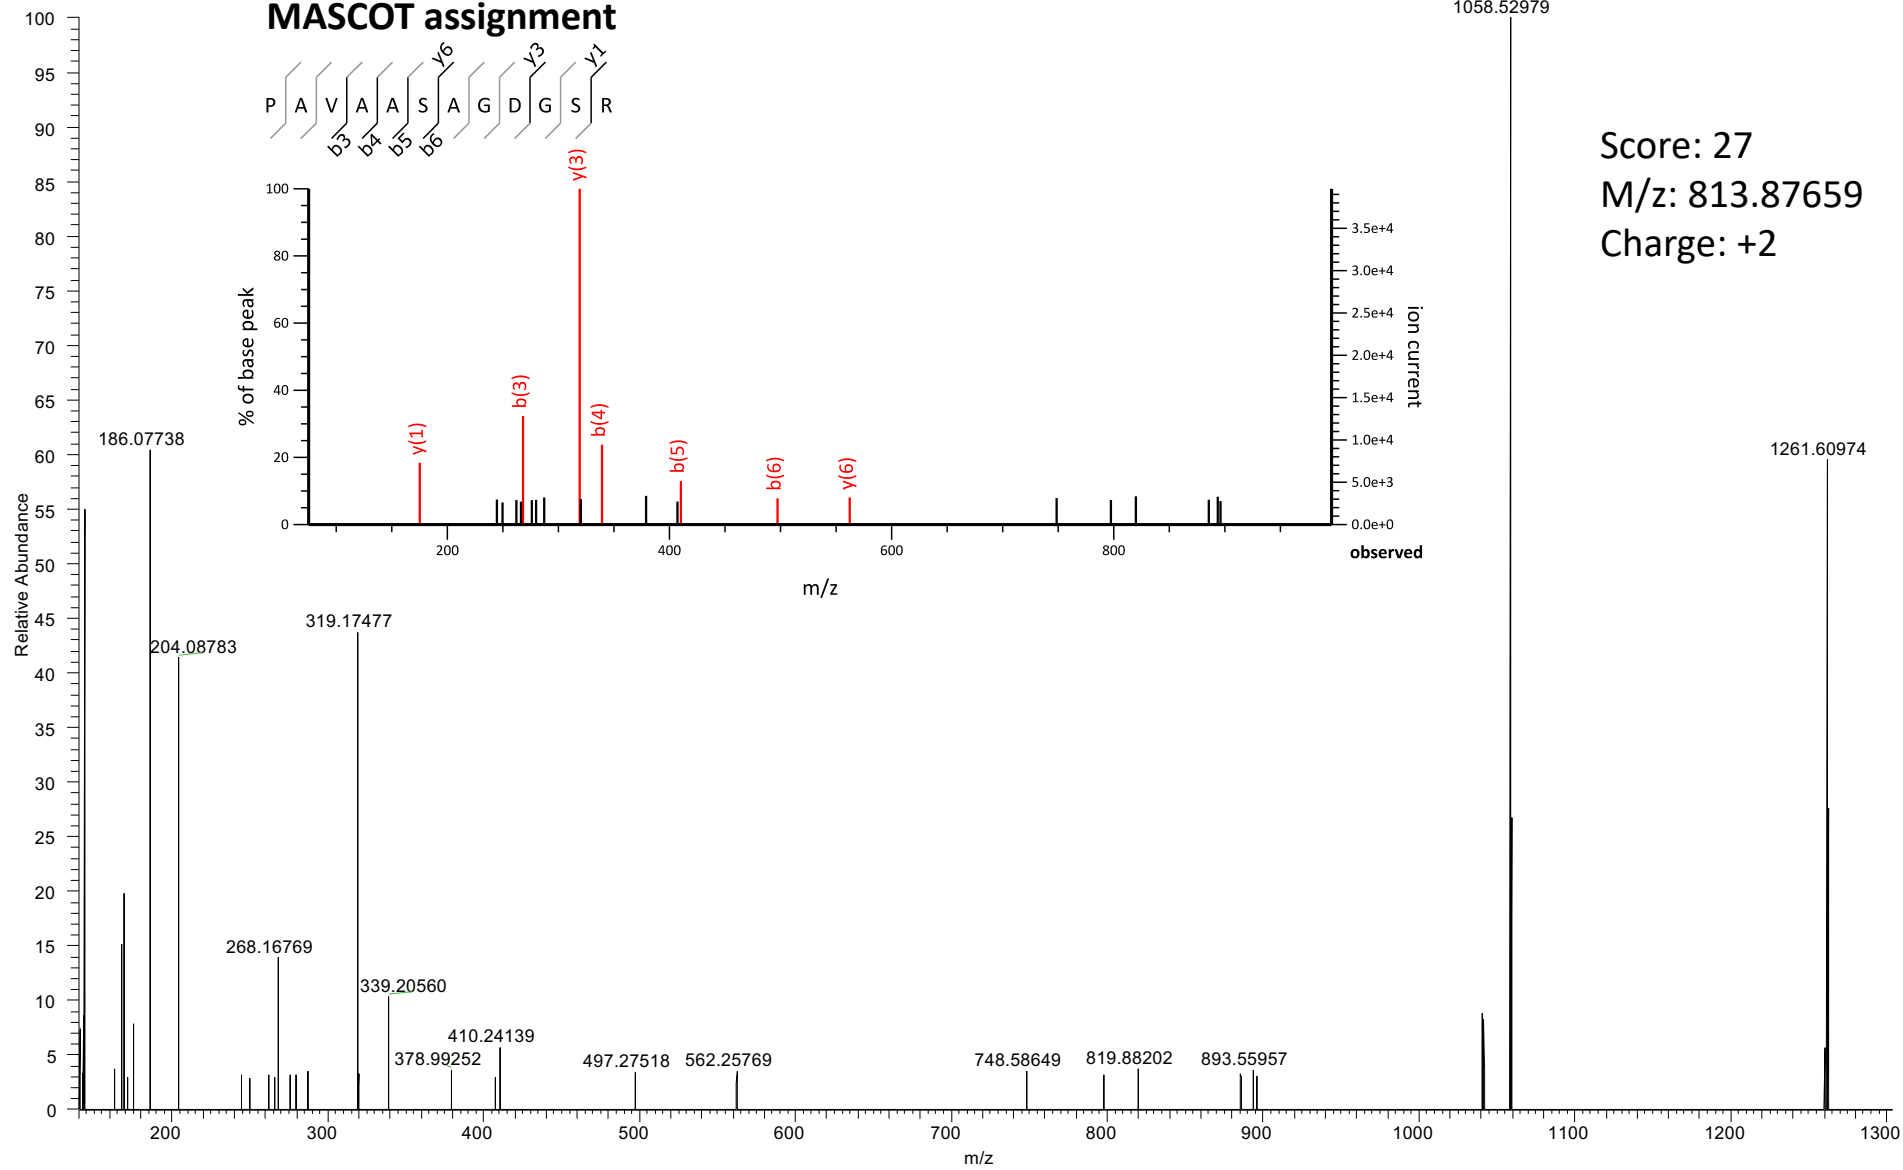

# ITMS-CID

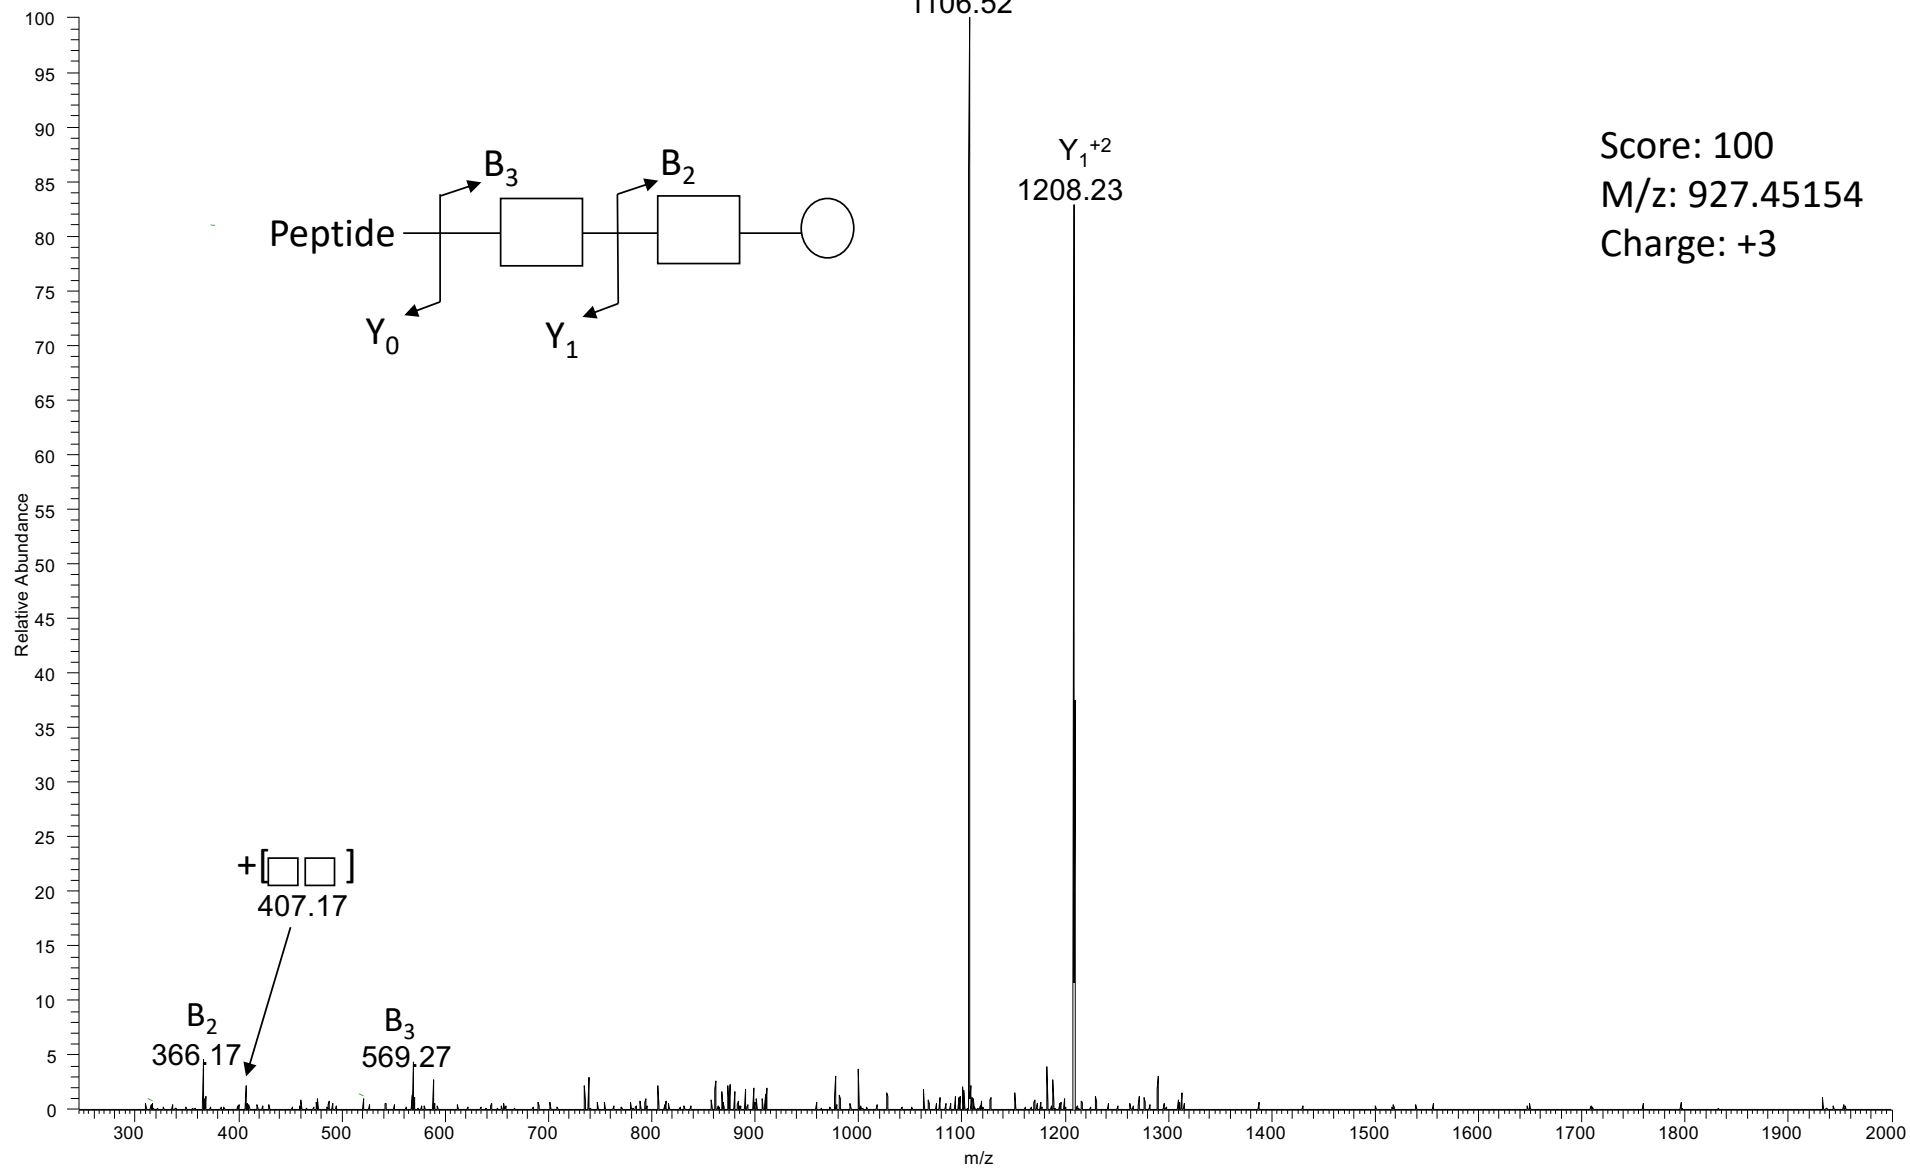

Score: 100  
M/z: 927.45154  
Charge: +3

FTMS-HCD

MASCOT assignment

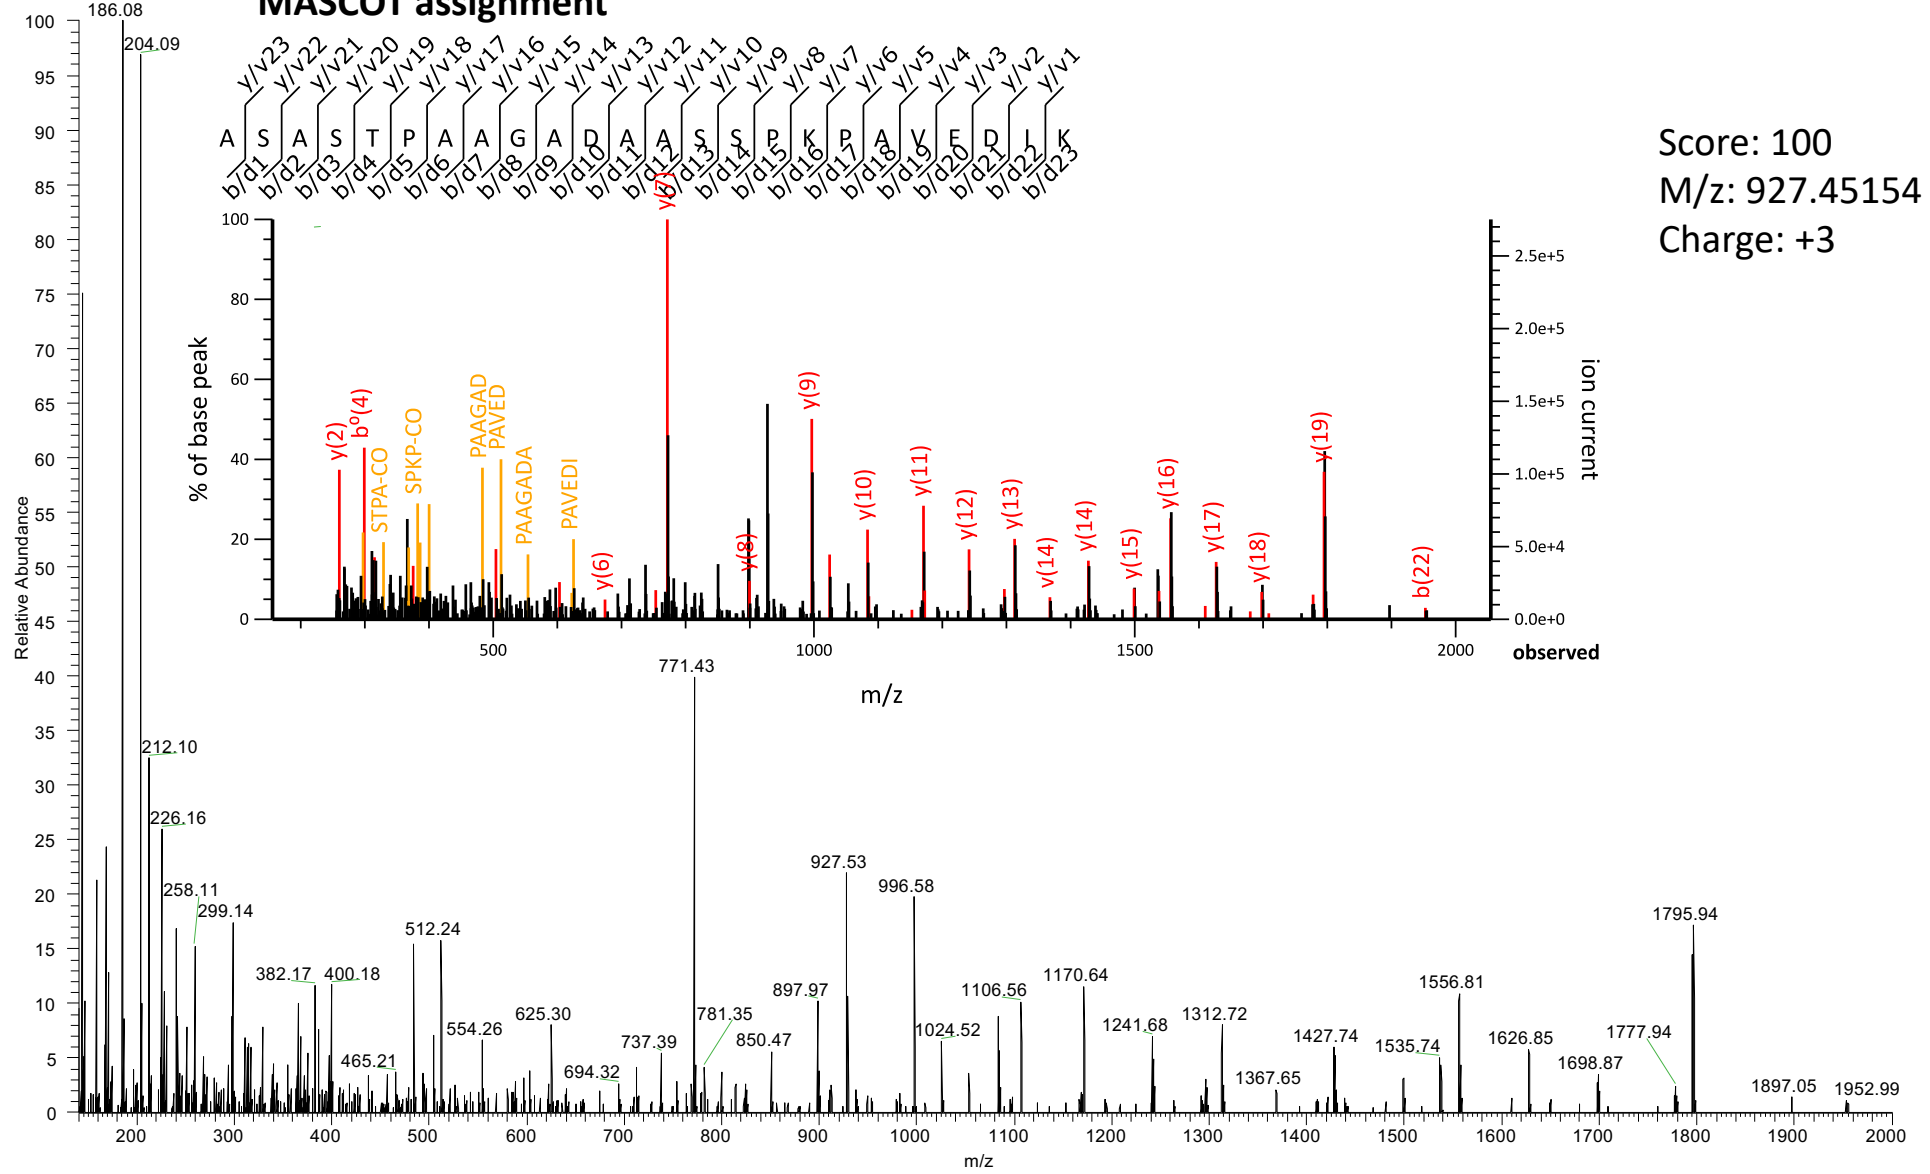

Score: 100  
M/z: 927.45154  
Charge: +3

# ITMS-CID

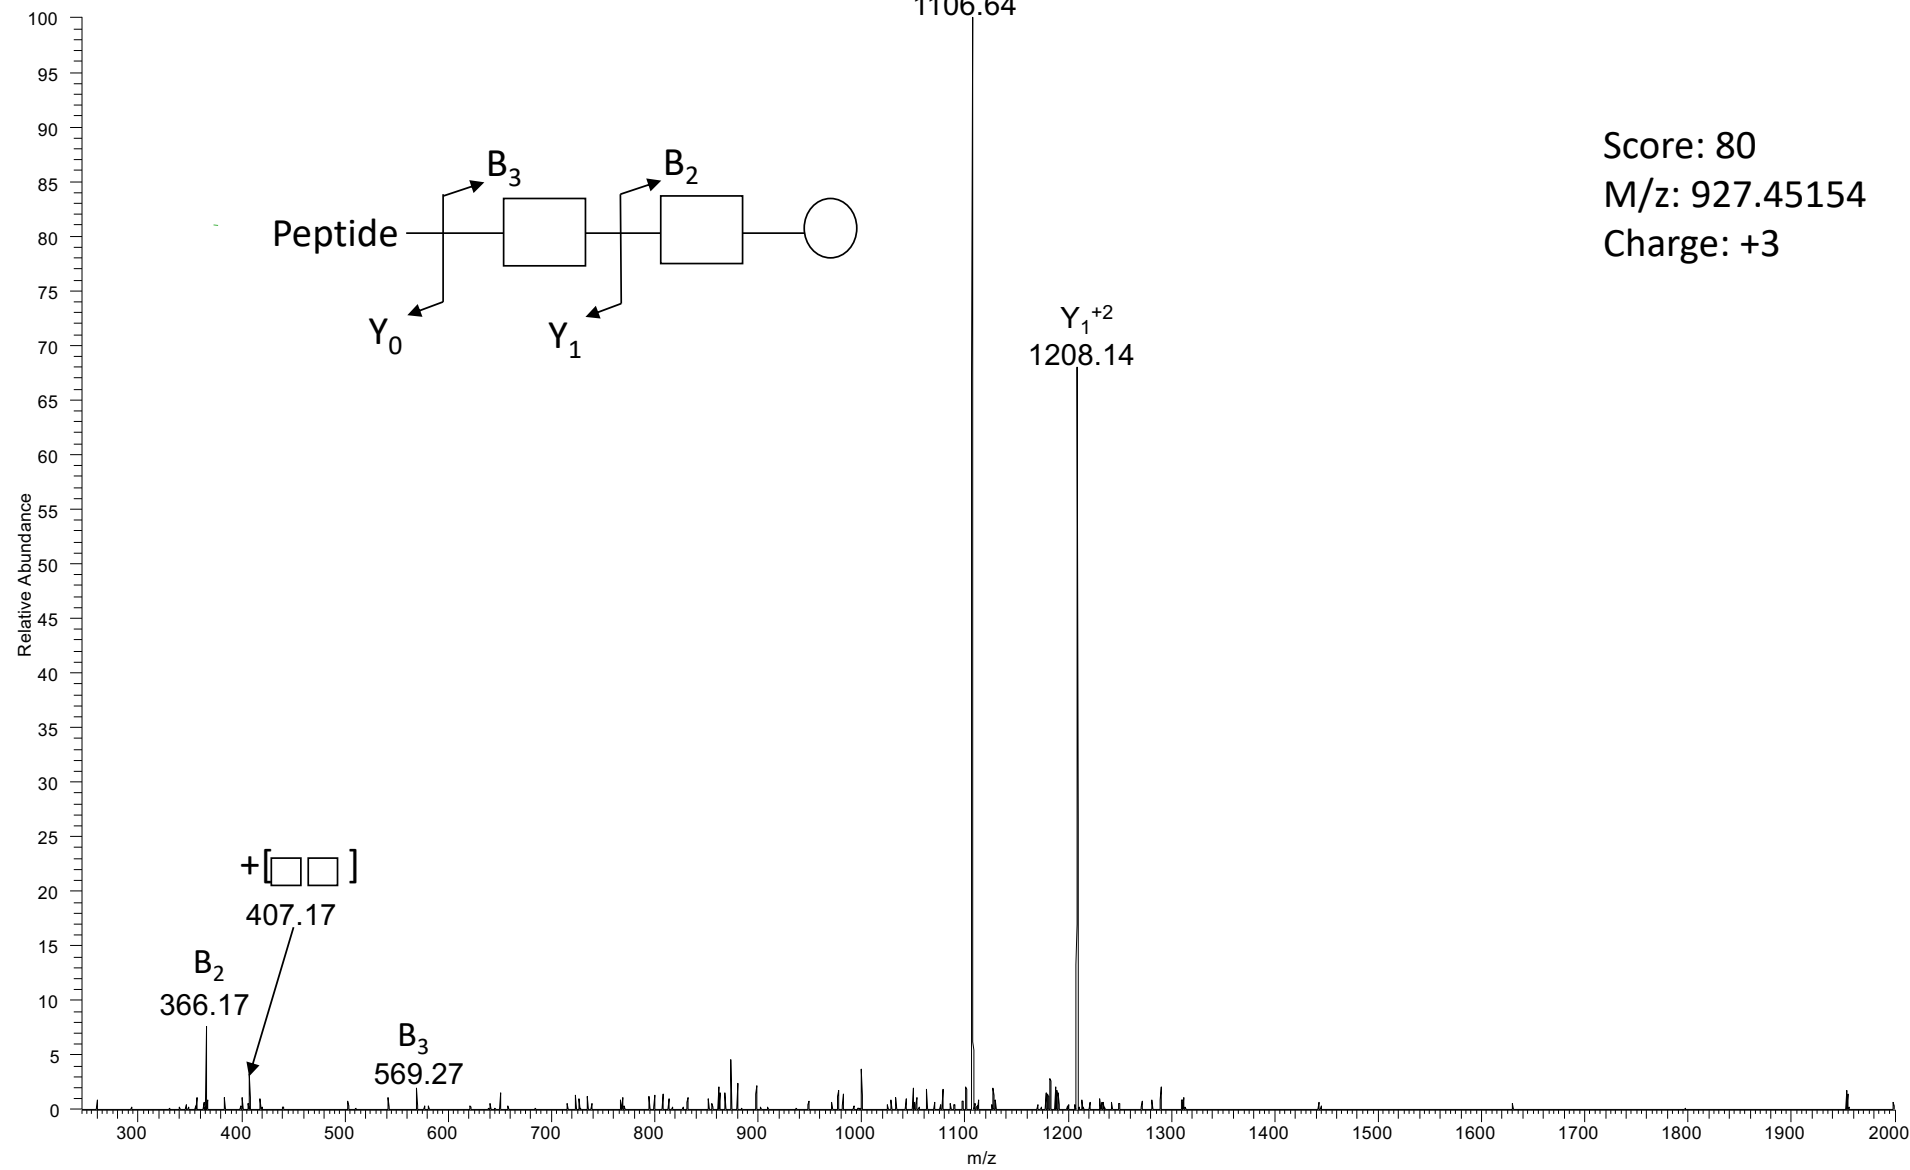

Score: 80

M/z: 927.45154

Charge: +3



FTMS-HCD

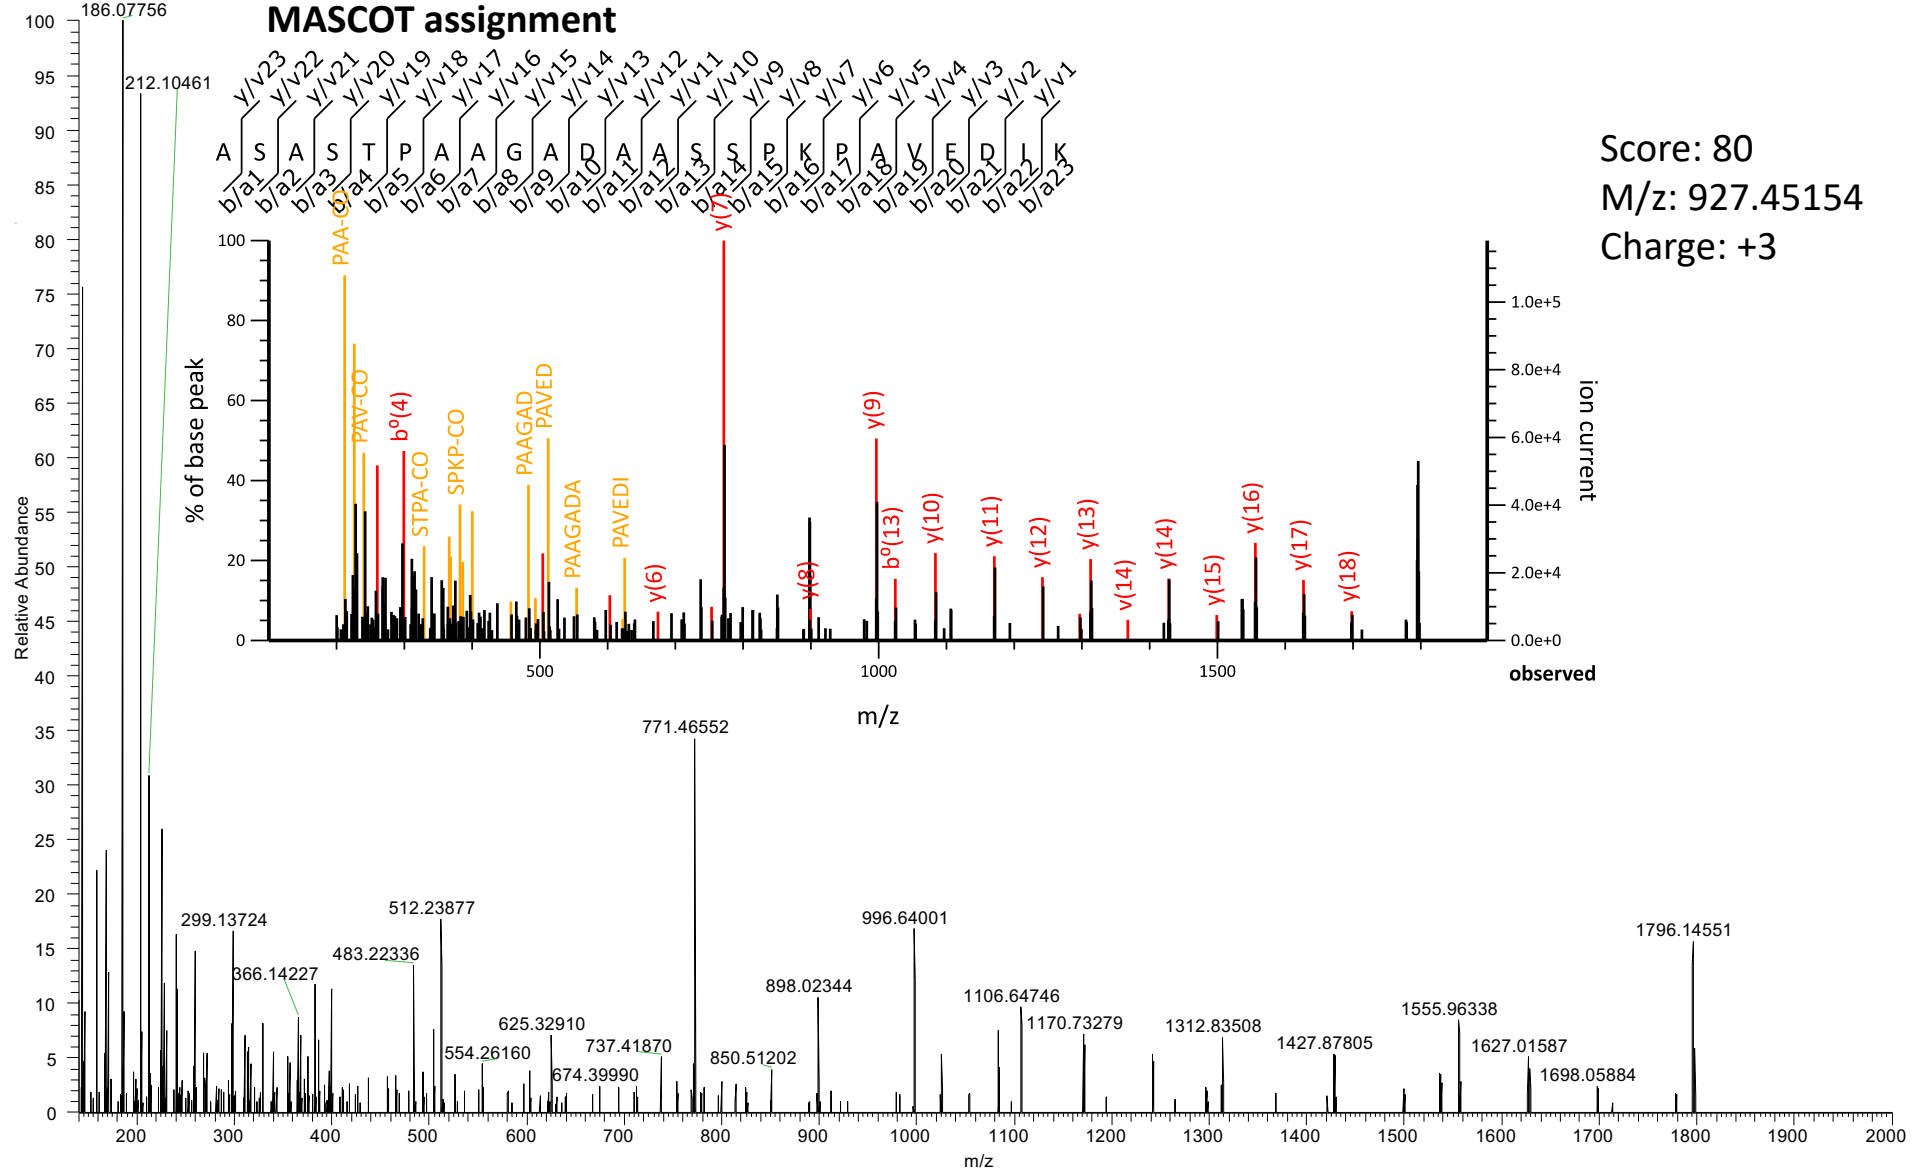

ITMS-CID

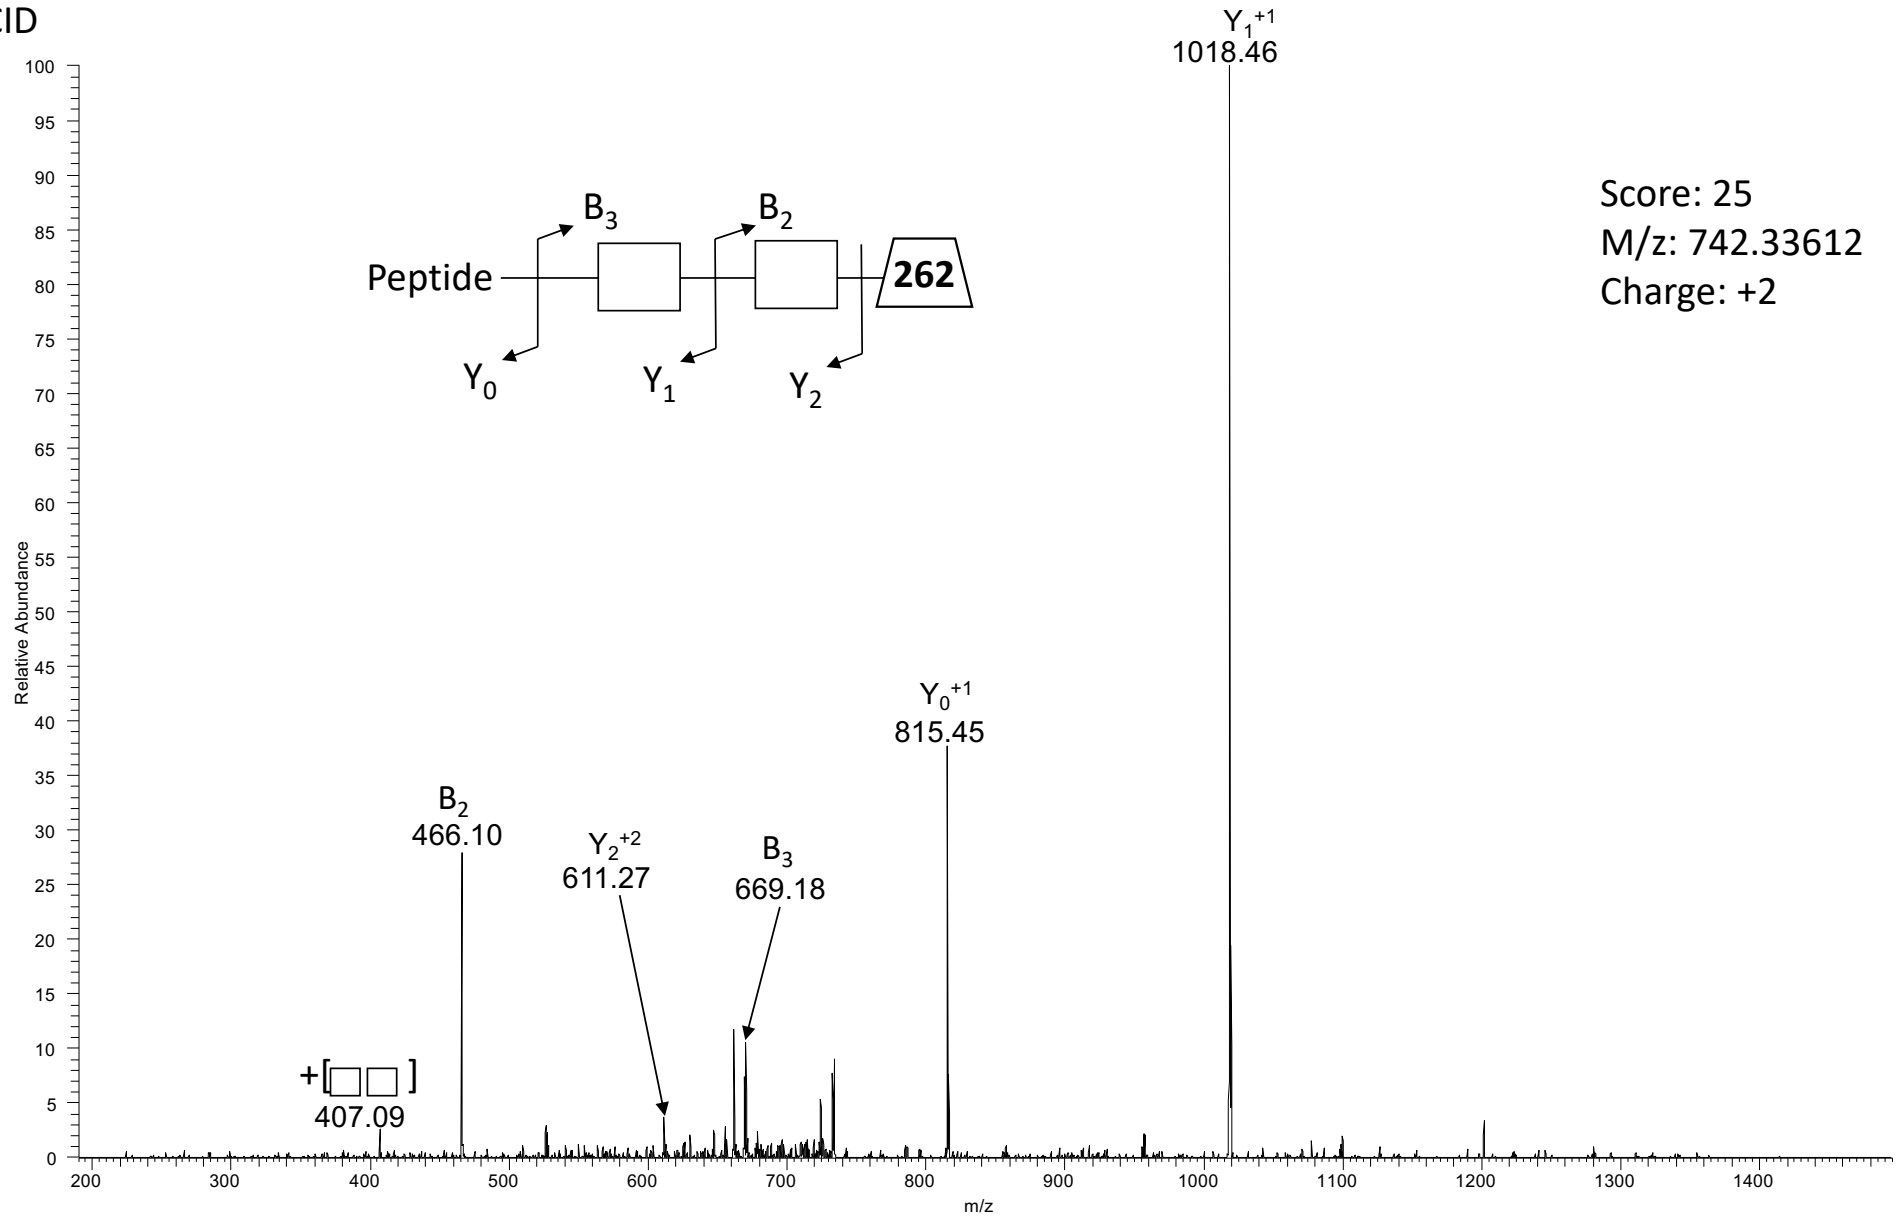

Score: 25  
M/z: 742.33612  
Charge: +2

FTMS-HCD

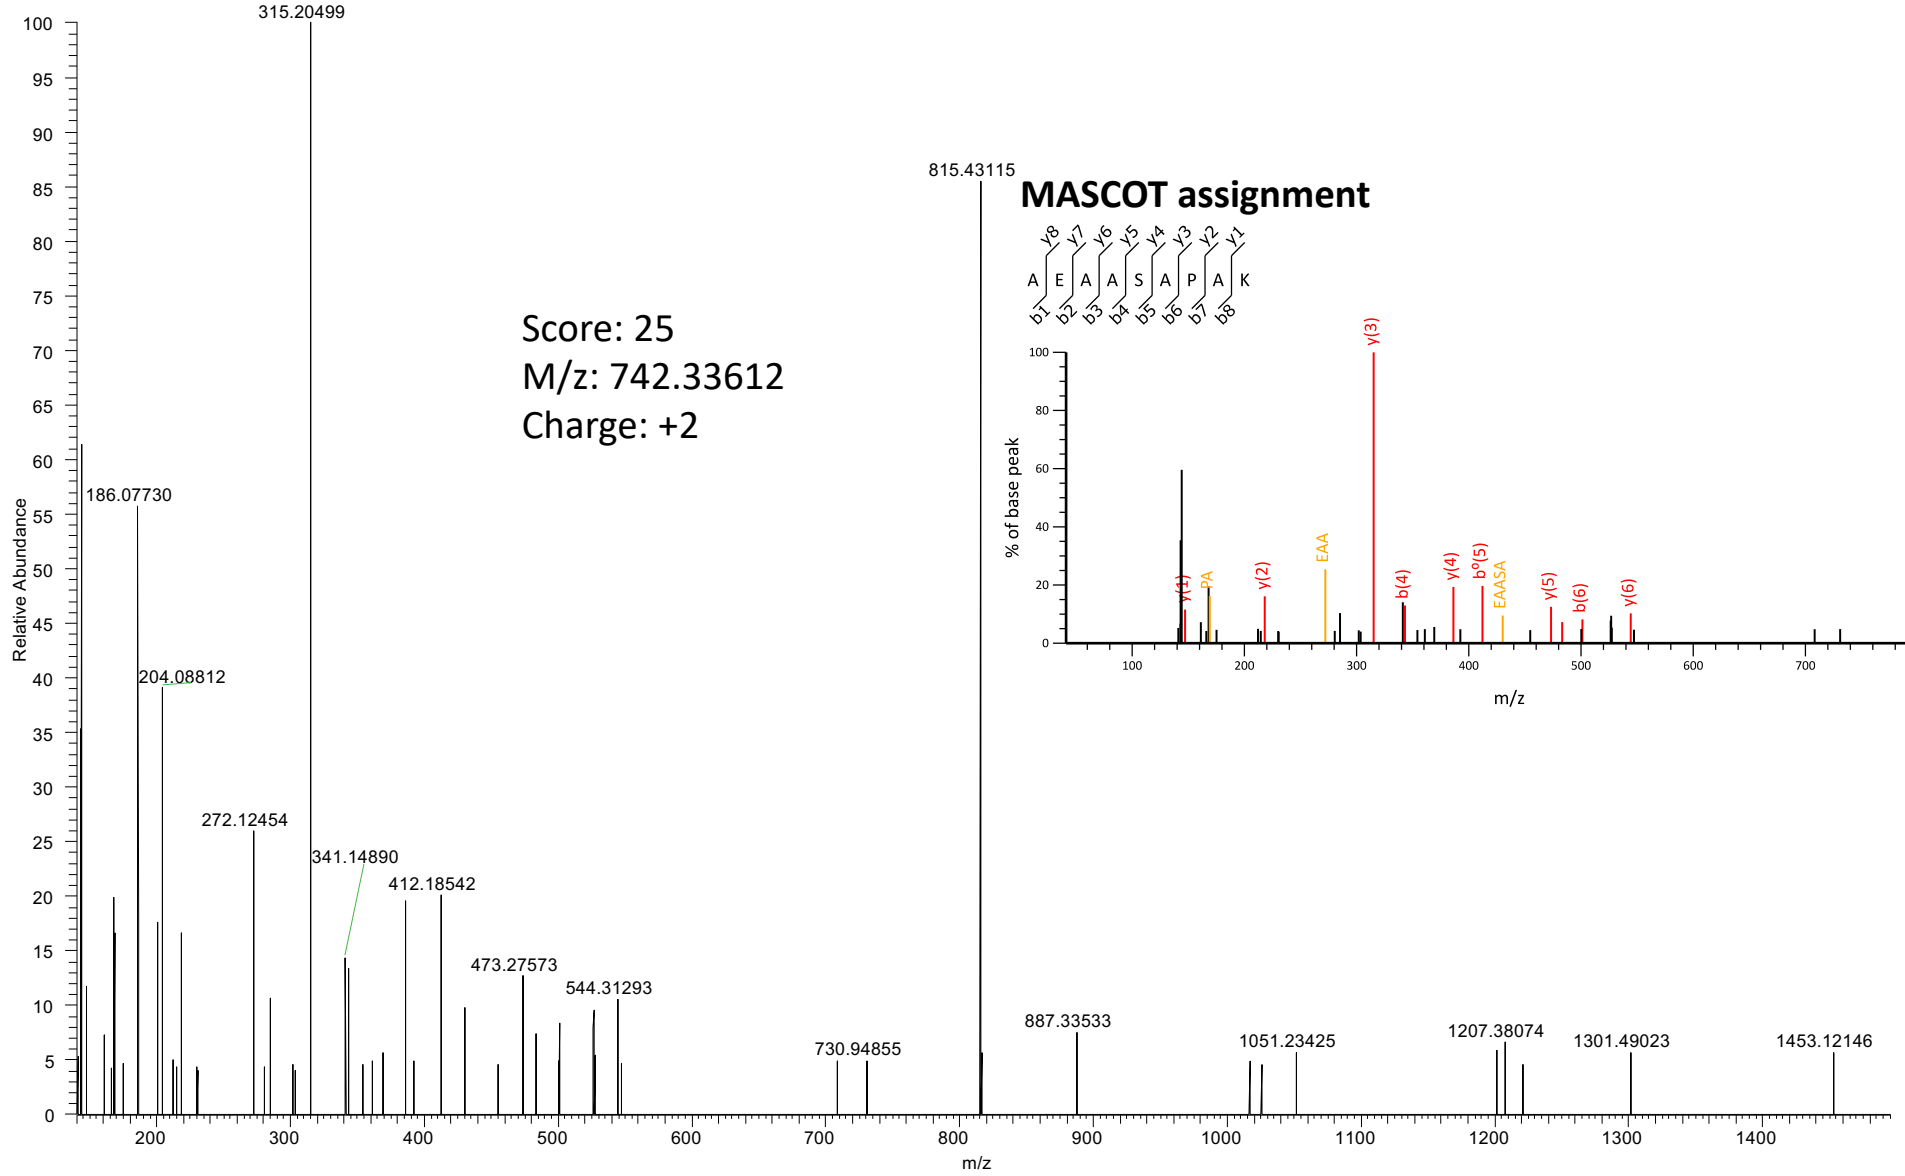

Score: 25  
M/z: 742.33612  
Charge: +2

MASCOT assignment

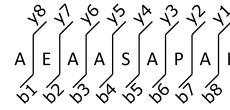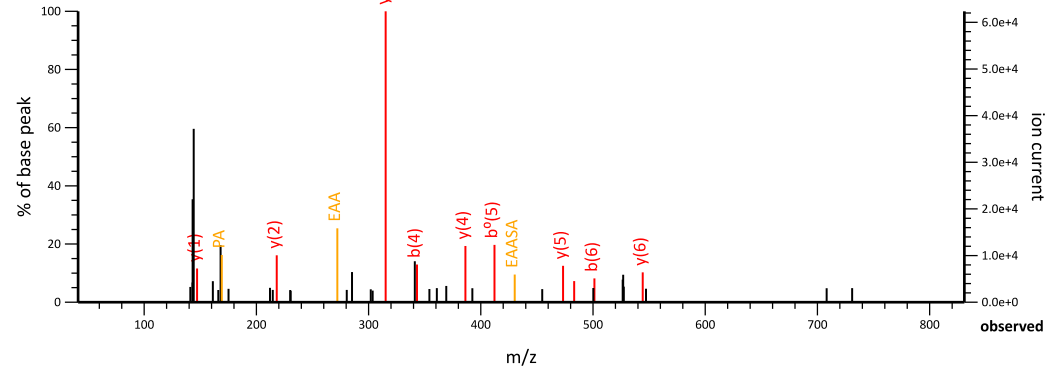

# ITMS-CID

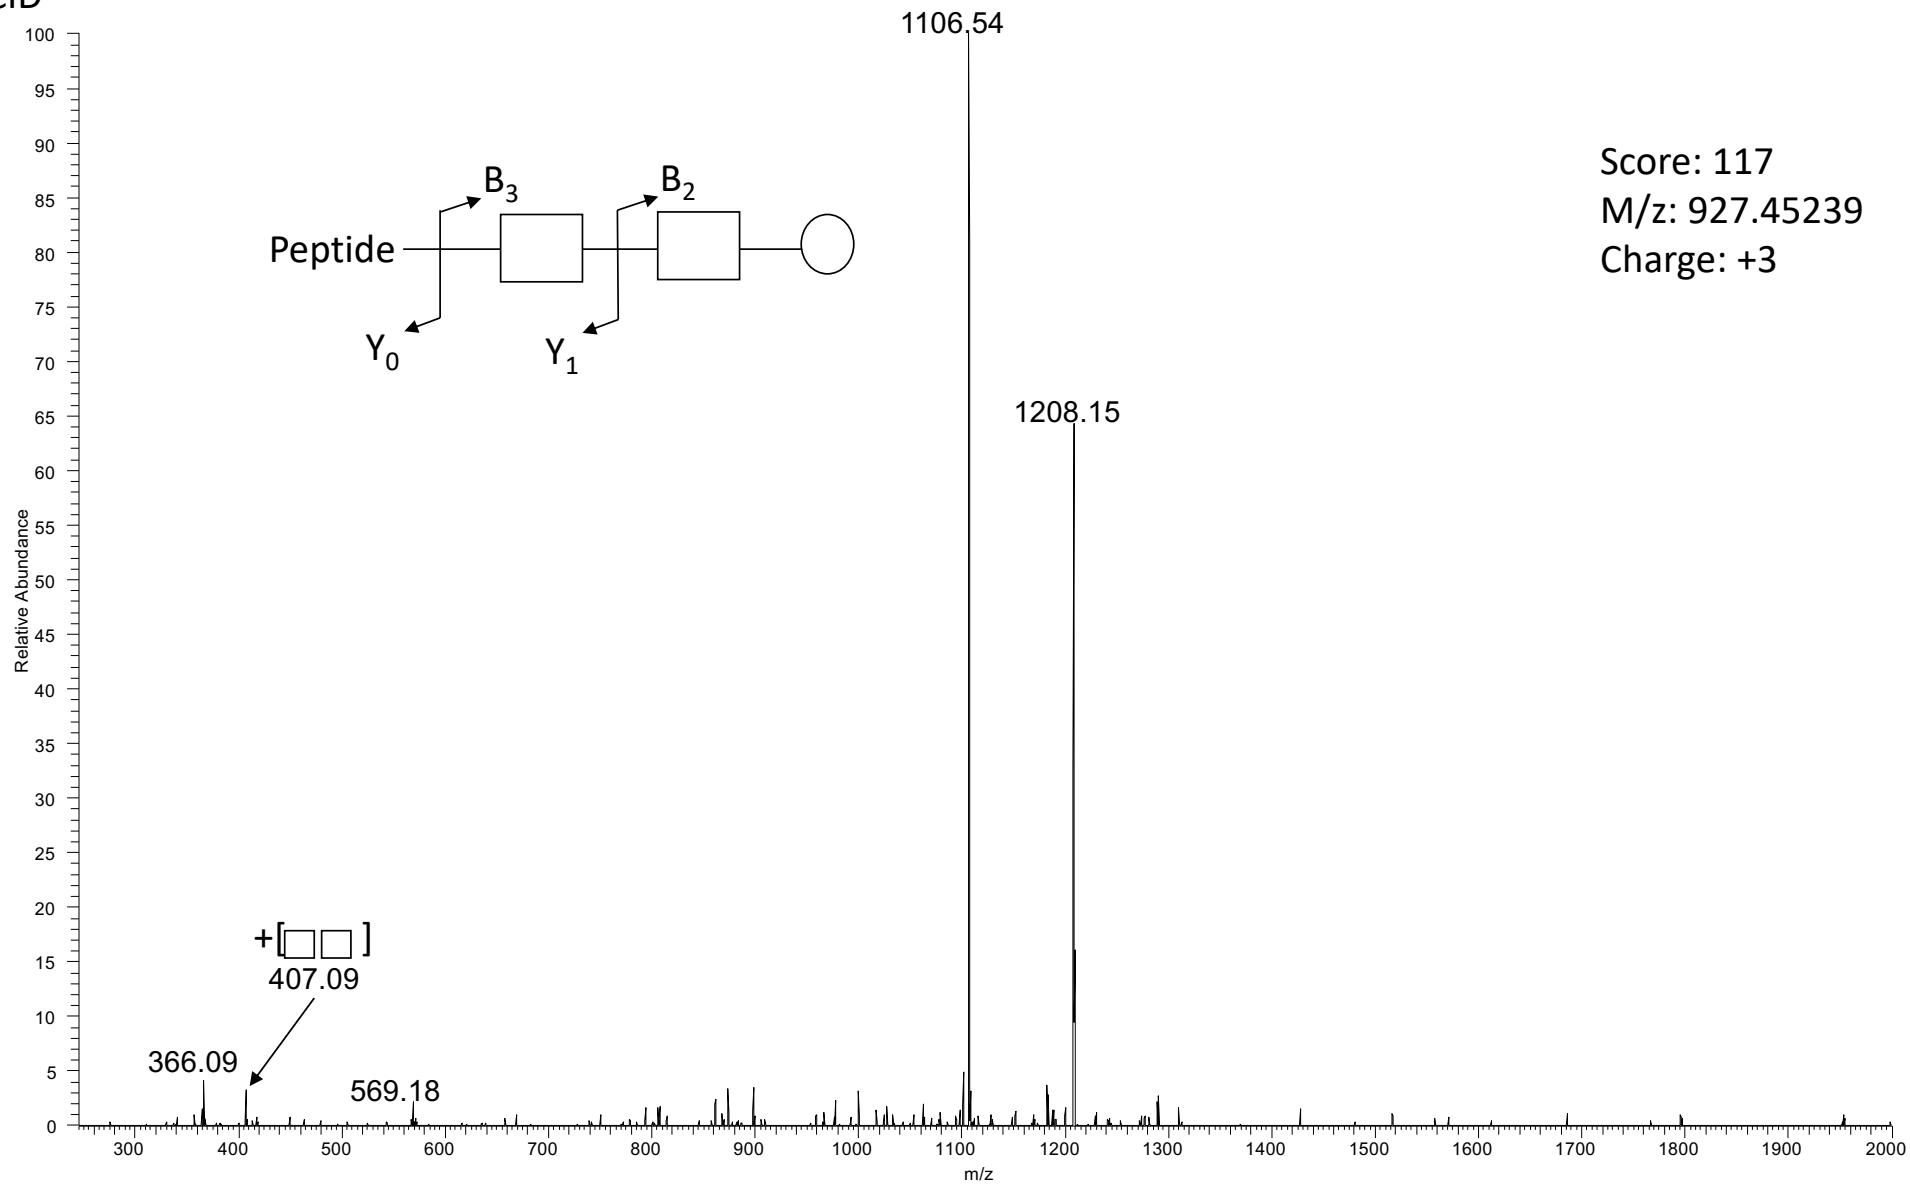

Score: 117  
M/z: 927.45239  
Charge: +3

FTMS-HCD

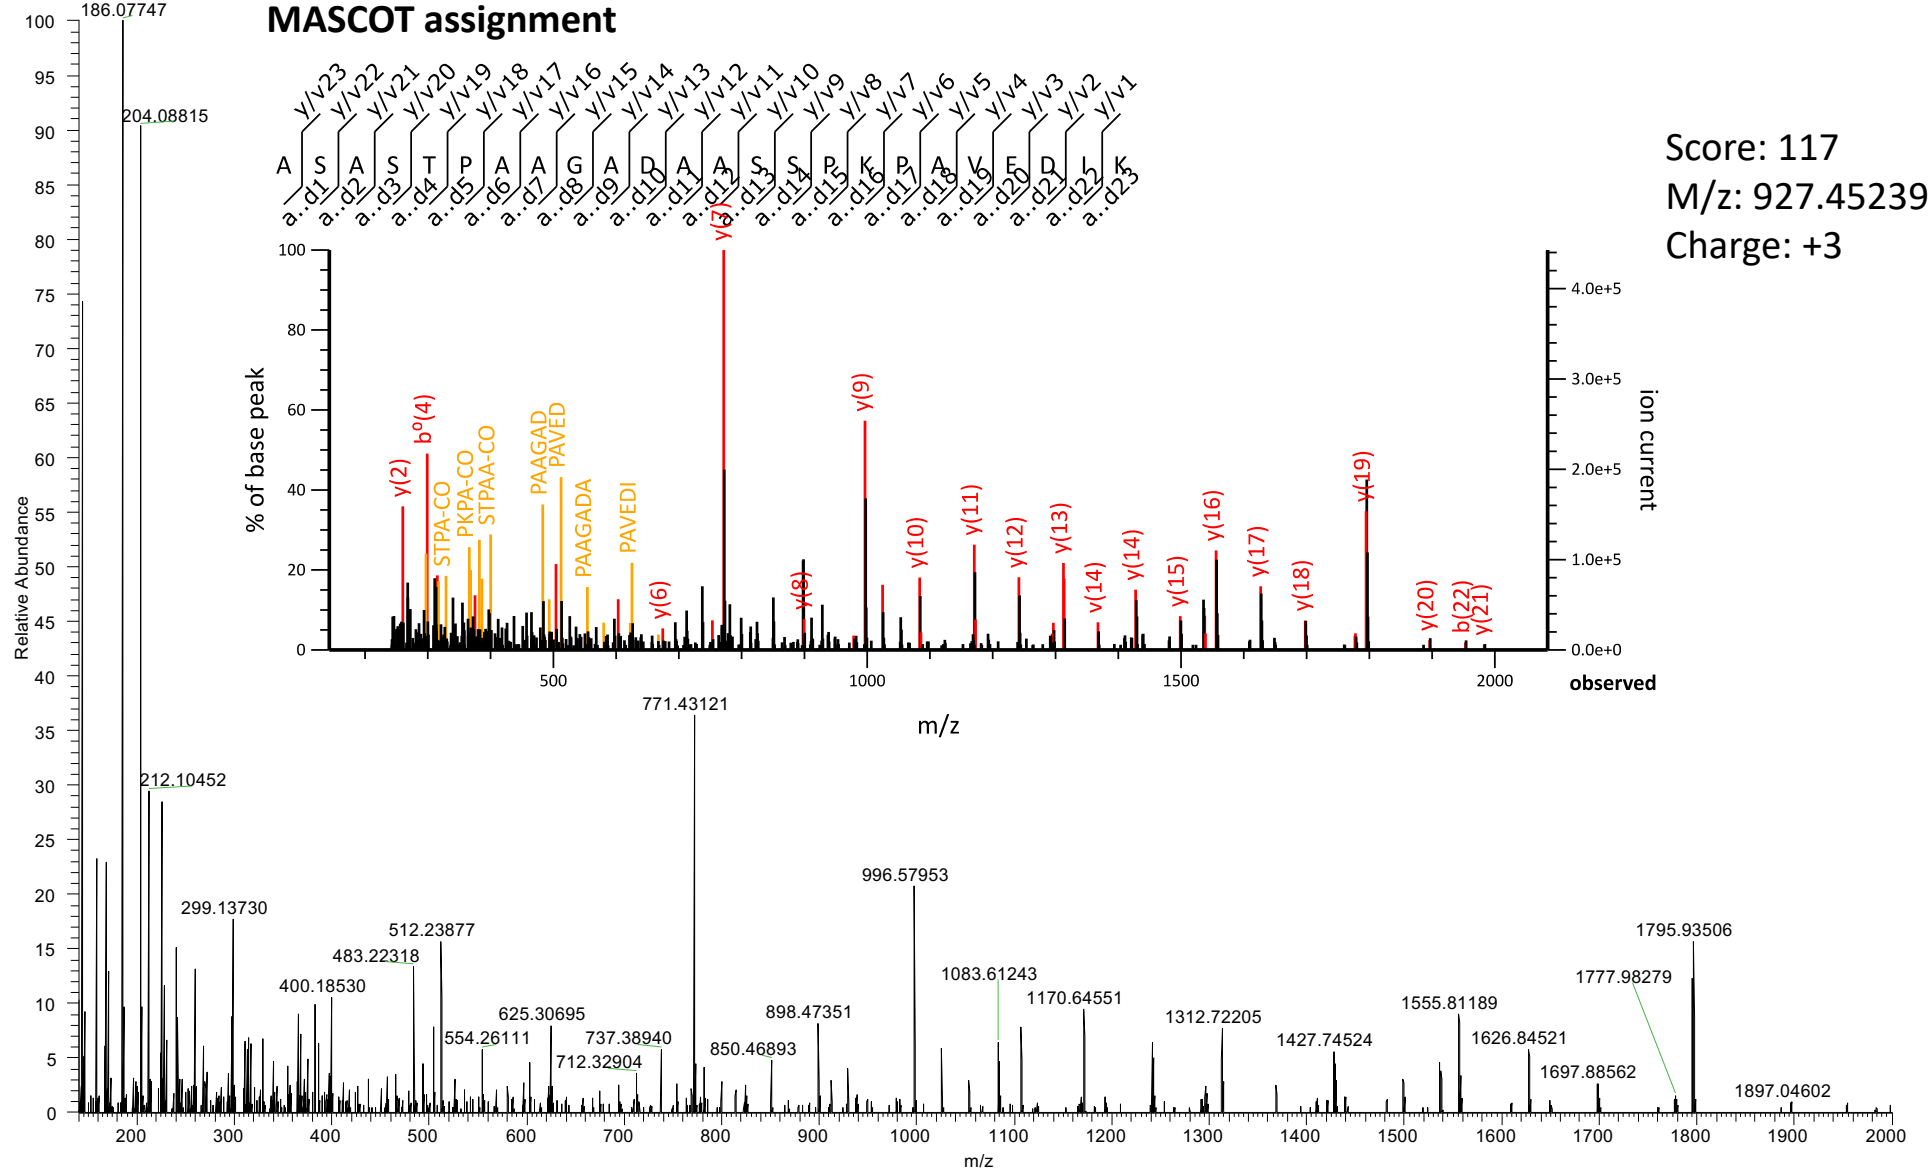

Supplement: supp_RA119.009671_153342_2_supp_366568_pv1sjg.pdf [file supp_RA119.009671_153342_2_supp_366568_pv1sjg.pdf]
