# Supplementary material
Source: PubMed Central journal article supplement (PMC6737235)
Supplement: supp_RA119.009671_153342_2_supp_366566_pv1sjf.pdf [file supp_RA119.009671_153342_2_supp_366566_pv1sjf.pdf]

### Supplementary Data 1: Identified *Burkholderia thailandensis* E264 glycopeptides

| Gene                                      | Protein name                                           | Uniprot accession | m/z        | Charge | MH+      | peptide mass | Glycan mass | Peptide sequence   | Mascot Ion Score | Page      |
|-------------------------------------------|--------------------------------------------------------|-------------------|------------|--------|----------|--------------|-------------|--------------------|------------------|-----------|
| unannotated, chromosome 1 (871694:872364) | unannotated ORF                                        | N/A               | 856.3886   | 2      | 1711.769 | 943.52       | 768.25      | AEAASAPAKK         | 45               | 2 and 3   |
| unannotated, chromosome 1 (871694:872364) | unannotated ORF                                        | N/A               | 792.3414   | 2      | 1583.675 | 815.42       | 768.25      | AEAASAPAK          | 37               | 4 and 5   |
| BTH_I3002                                 | ABC transporter, periplasmic substrate-binding protein | Q2SU93            | 1007.4660  | 2      | 2013.924 | 1445.71      | 568.21      | PAAASGAPAPAASGAAAH | 47               | 6 and 7   |
| BTH_I12165                                | Uncharacterized protein                                | Q2T396            | 826.41028  | 3      | 2477.215 | 1909.00      | 568.21      | DASGKEIPLTPQAASQAK | 41               | 8 and 9   |
| unannotated, chromosome 1 (871694:872364) | unannotated ORF                                        | N/A               | 806.39978  | 2      | 1611.792 | 943.52       | 668.27      | AEAASAPAKK         | 38               | 10 and 11 |
| unannotated, chromosome 1 (871694:872364) | unannotated ORF                                        | N/A               | 742.35083  | 2      | 1483.694 | 815.42       | 668.27      | AEAASAPAK          | 49               | 12 and 13 |
| DR63_725                                  | Uncharacterized protein                                | A0A096YKY7        | 957.47852  | 2      | 1913.949 | 1345.69      | 568.26      | AVPAAPASGAASAPAH   | 60               | 14 and 15 |
| BTH_I1626                                 | Uncharacterized protein                                | Q2SY35            | 780.030017 | 3      | 2338.074 | 1769.86      | 568.21      | LNEHPQMQFAASAPTK   | 36               | 16 and 17 |

**Supplementary Data 1. Identified *Burkholderia thailandensis* E264 Glycopeptides.** A total of 8 unique glycopeptides were observed within whole cell proteome samples of *B. thailandensis* E264. For assigned glycopeptides the gene, protein name, uniprot accession (mapped to *B. thailandensis* E264), observed m/z, charge state, MH+ mass, peptide mass, glycan, peptide sequence, MASCOT ion score and containing annotated CID and HCD data are provided.

ITMS-CID

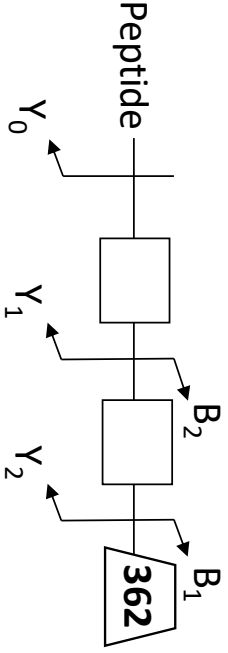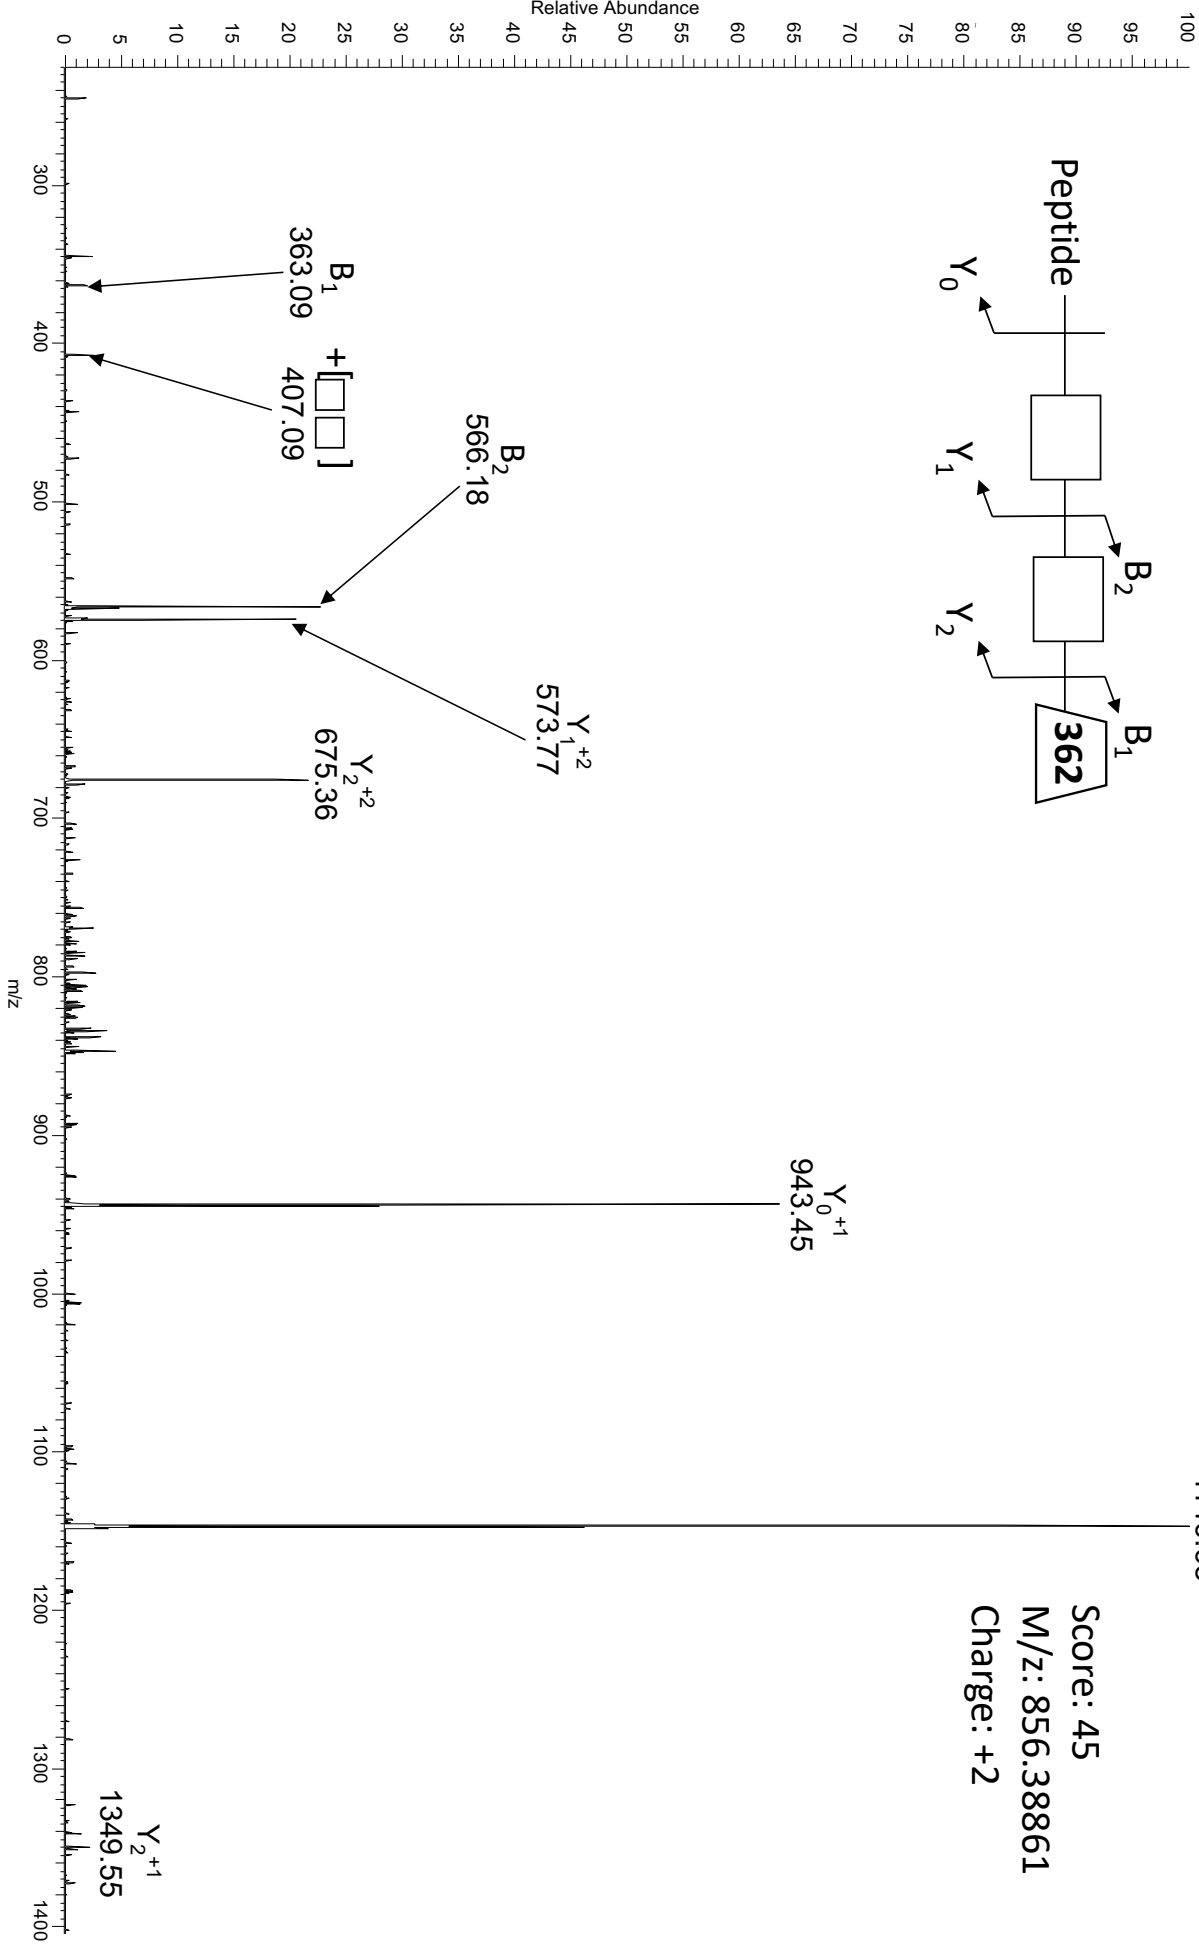

Score: 45  
M/z: 856.38861  
Charge: +2

FTMS-HCD

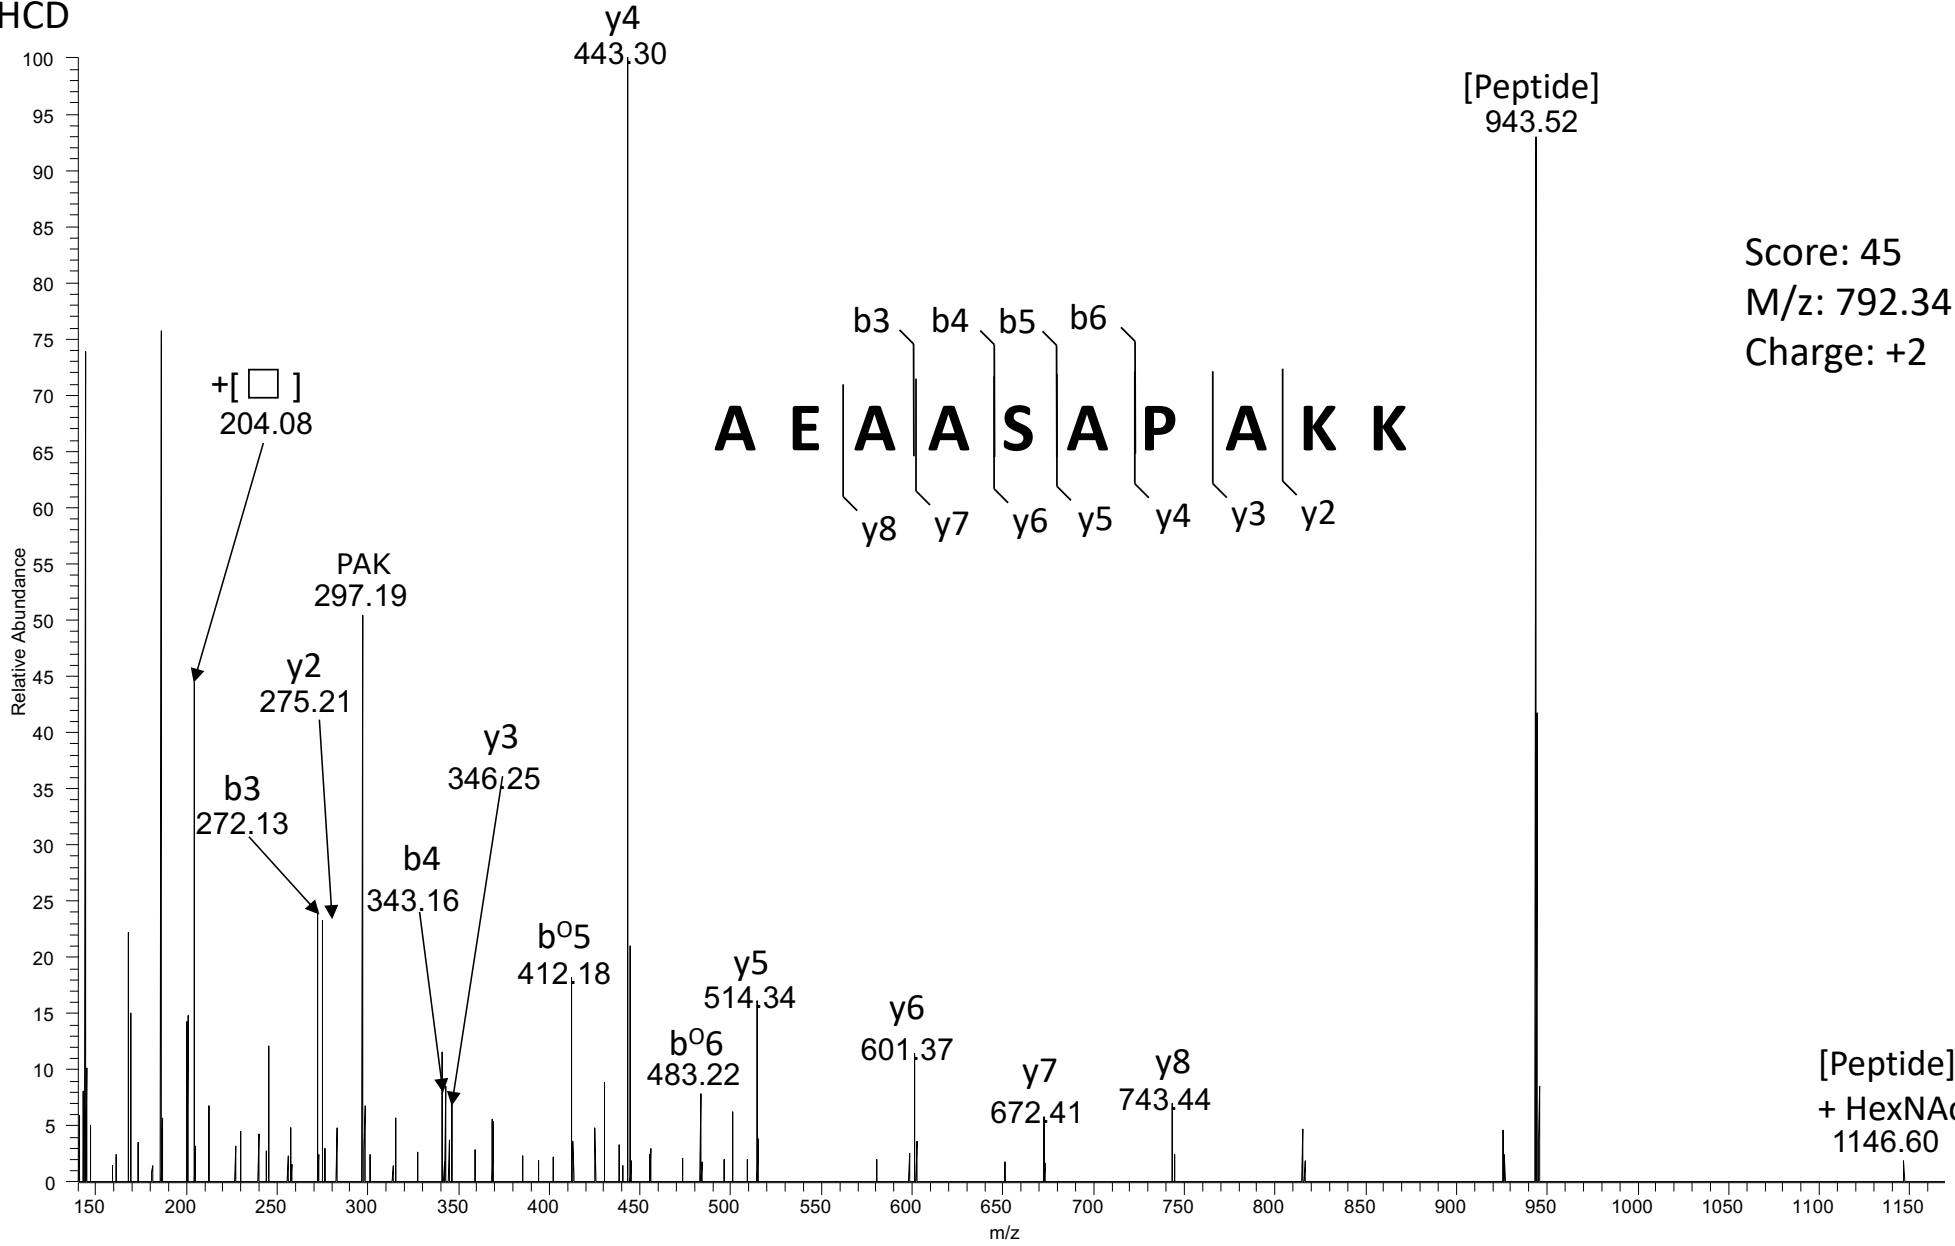

Score: 45  
M/z: 792.34137  
Charge: +2

ITMS-CID

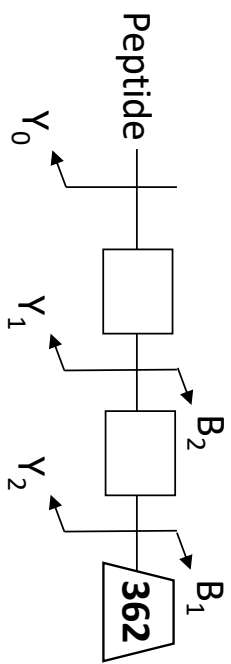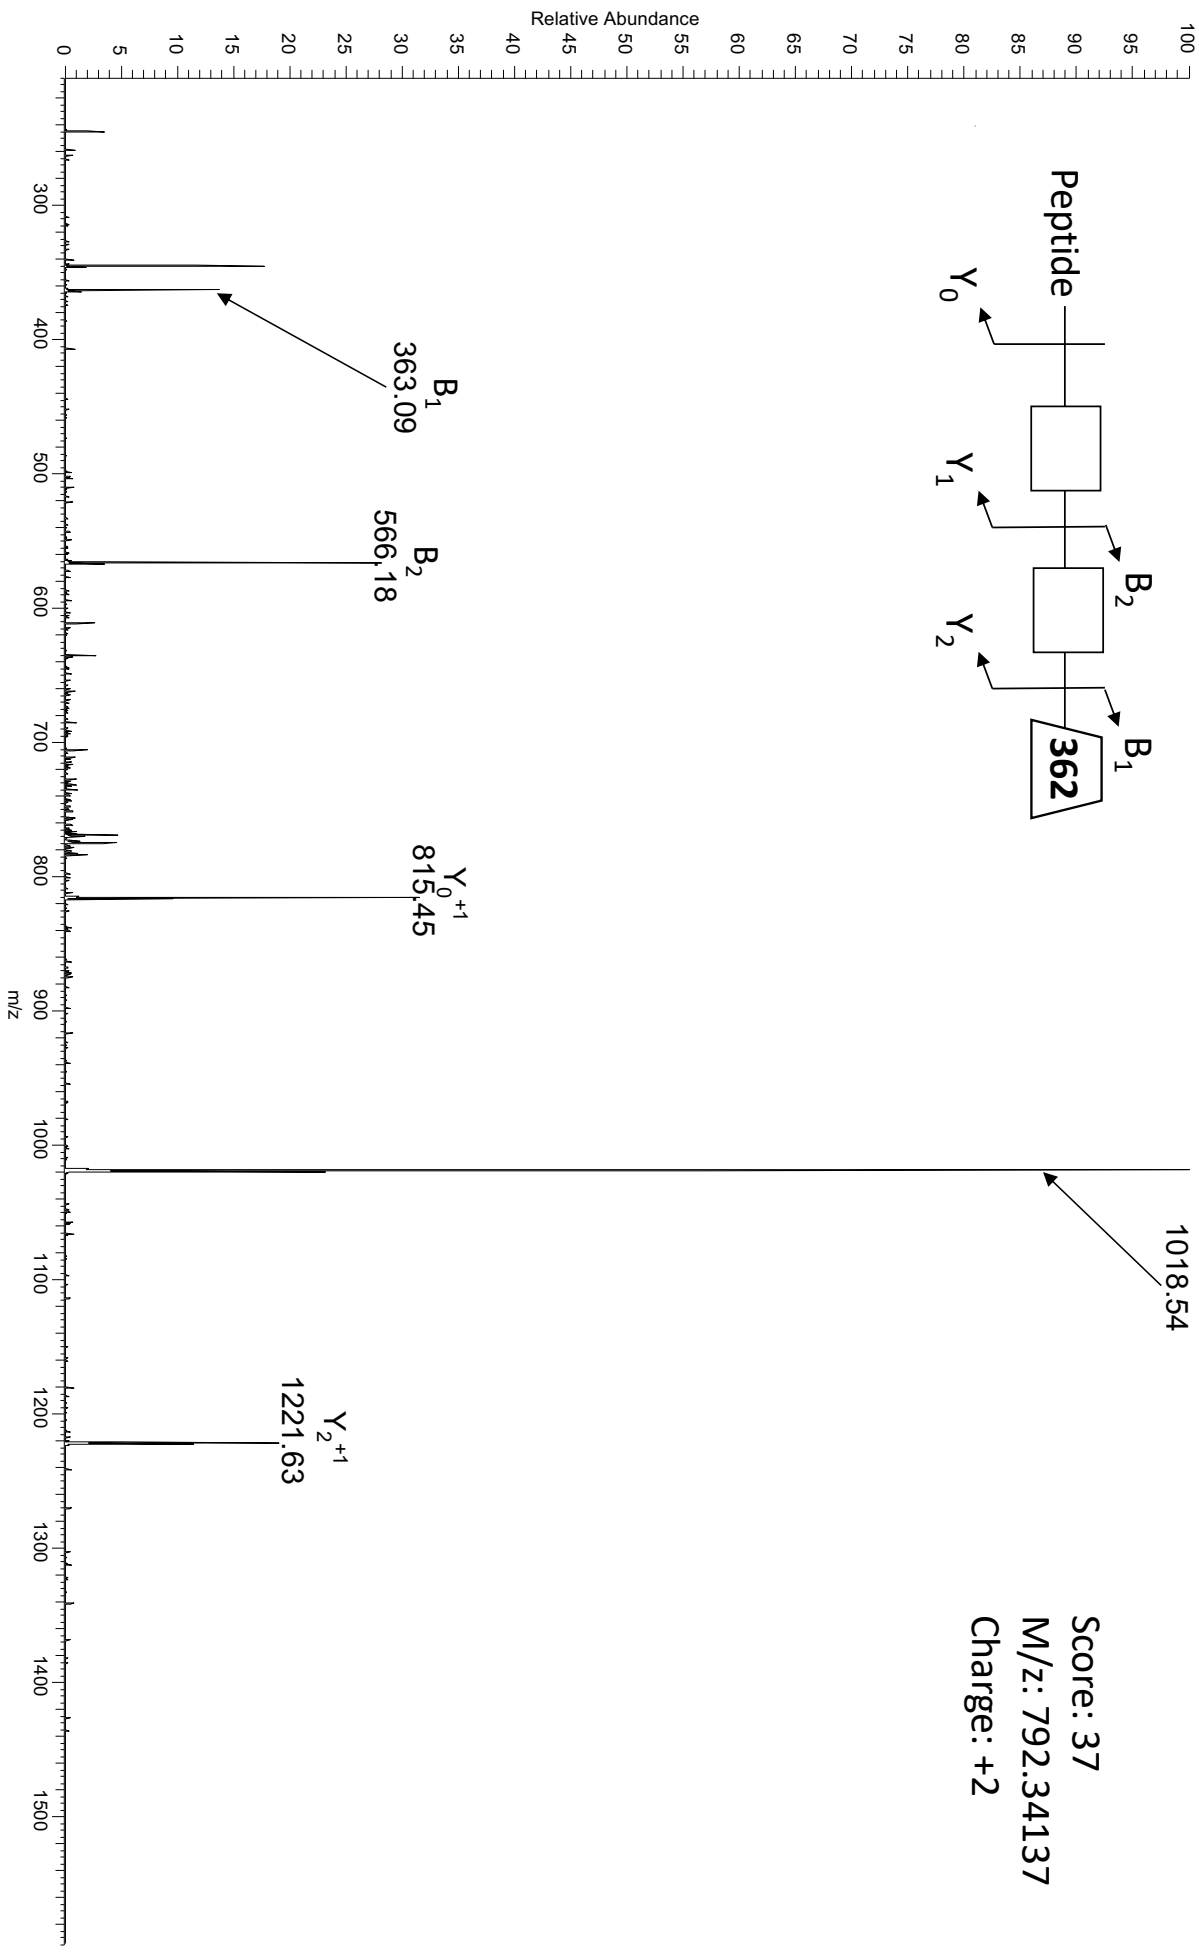

Score: 37  
M/z: 792.34137  
Charge: +2

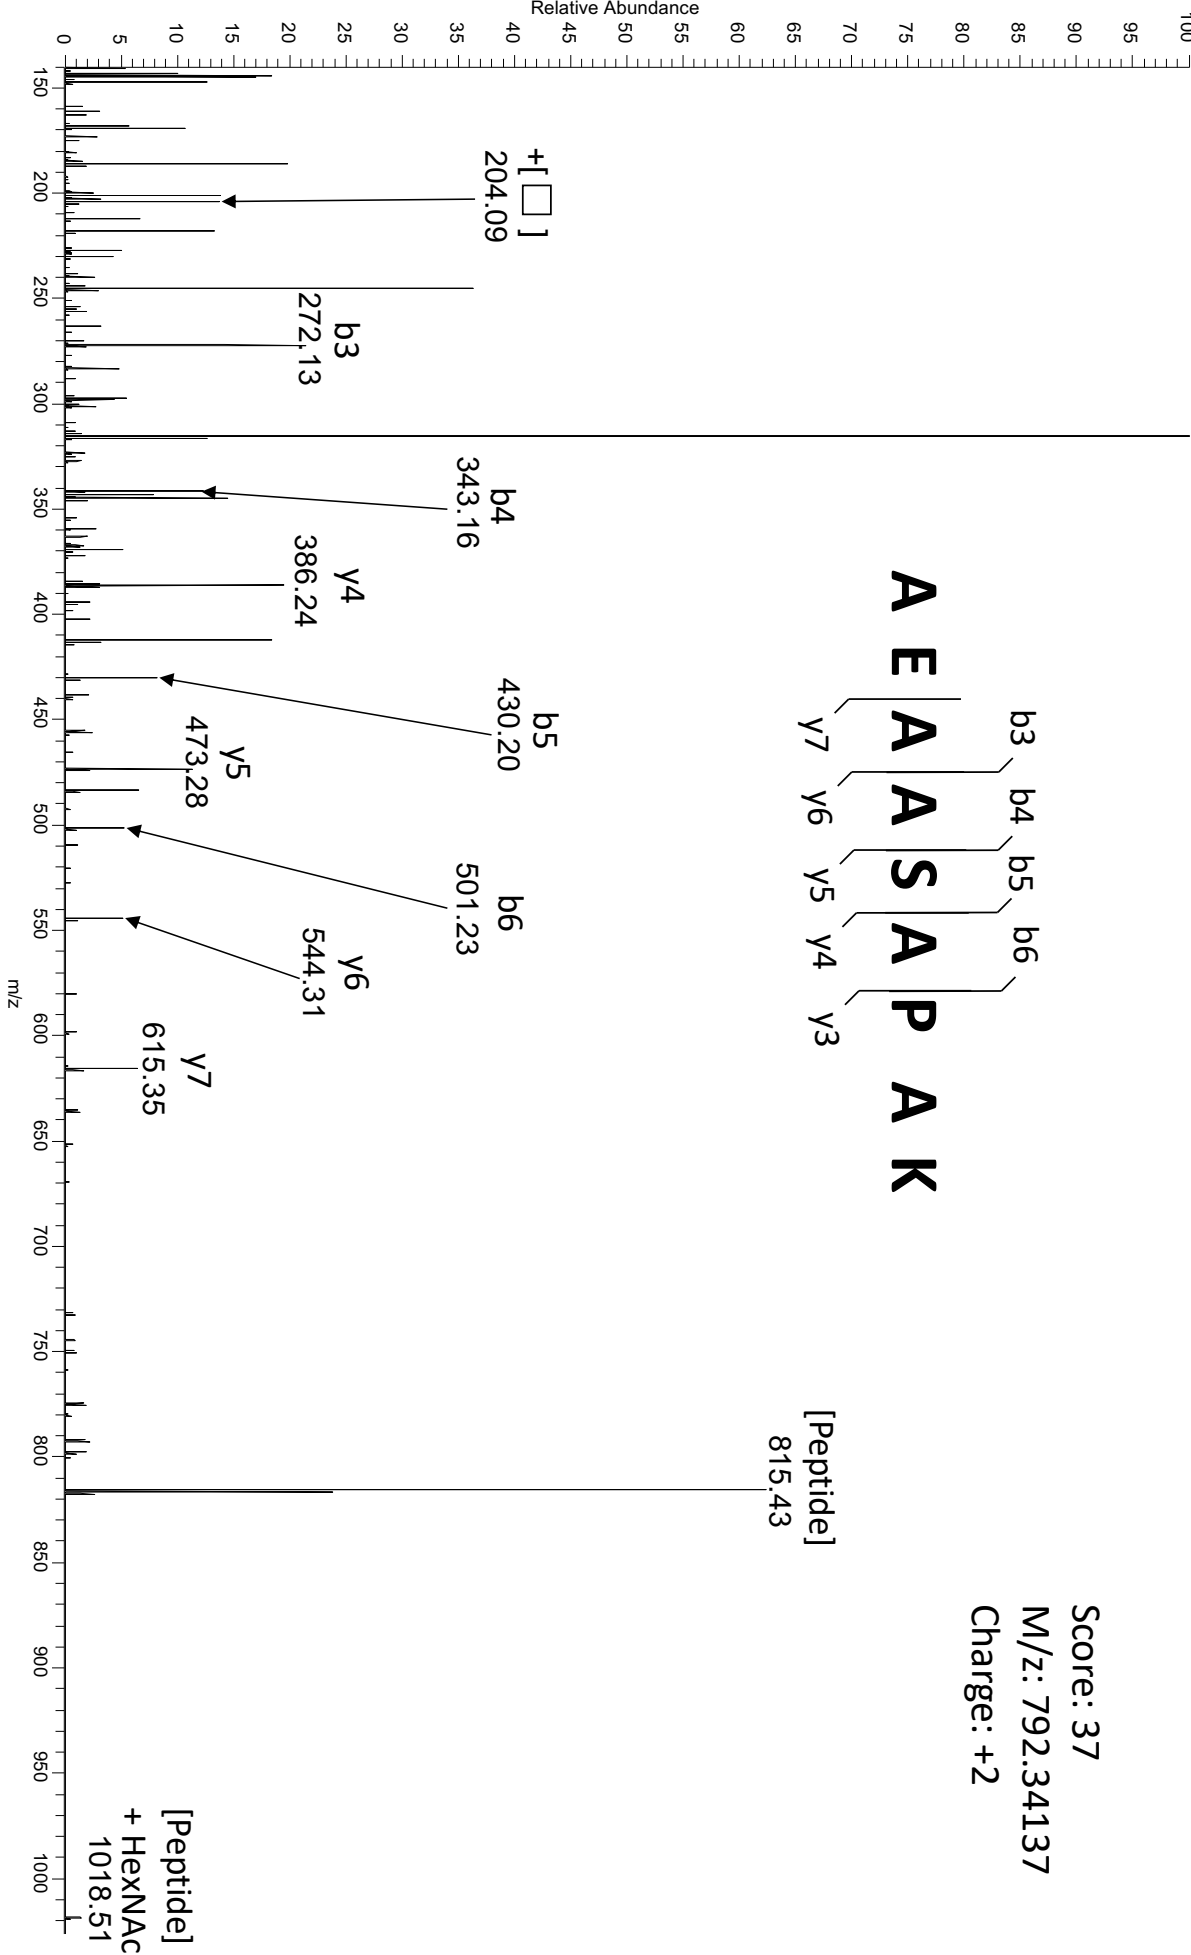

Score: 37

M/z: 792.34137

Charge: +2

ITMS-CID

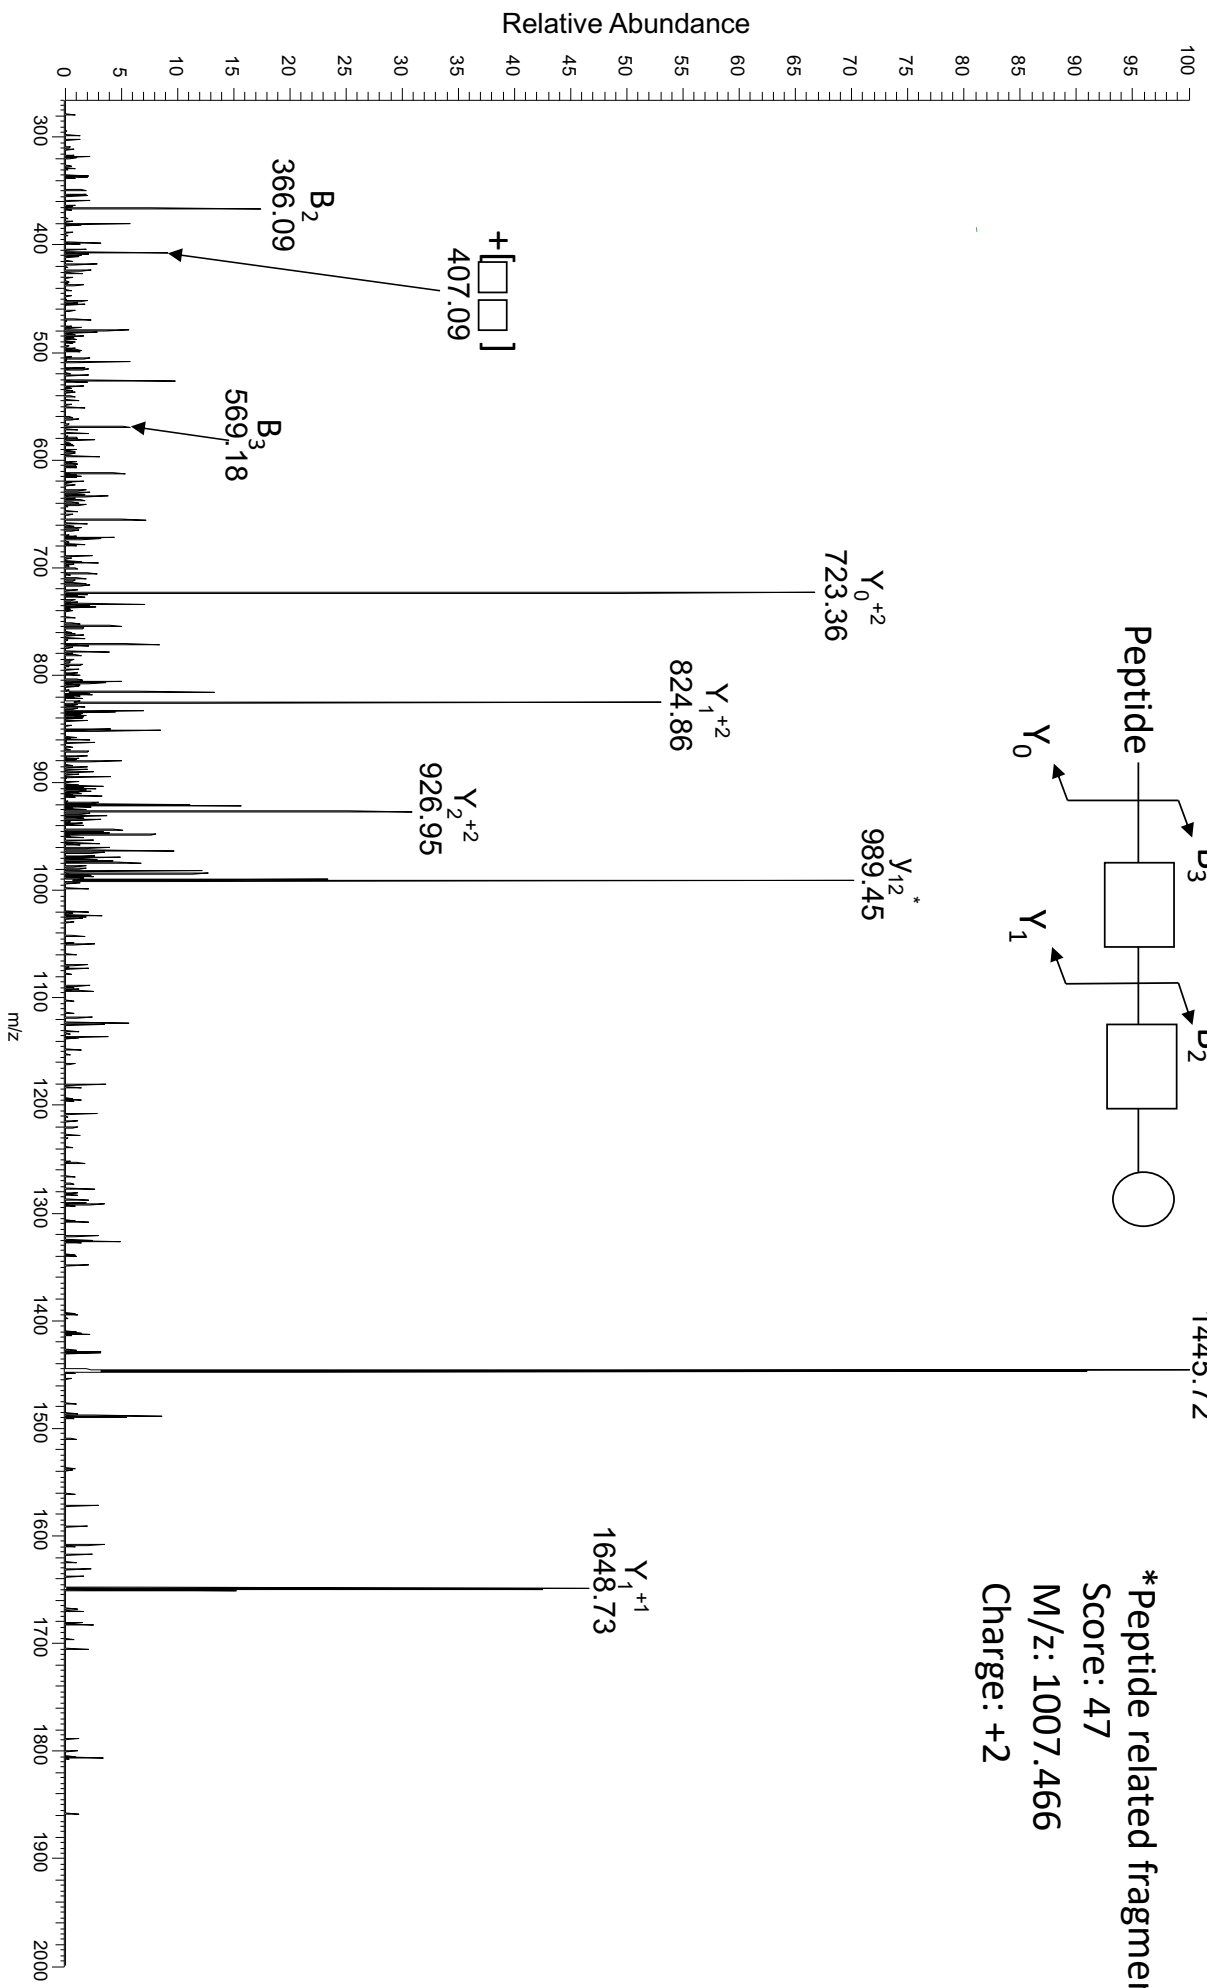

\* Peptide related fragment  
Score: 47  
M/z: 1007.466  
Charge: +2

[Precursor]<sup>+2</sup>  
1007.59

Score: 47  
M/z: 1007.466  
Charge: +2

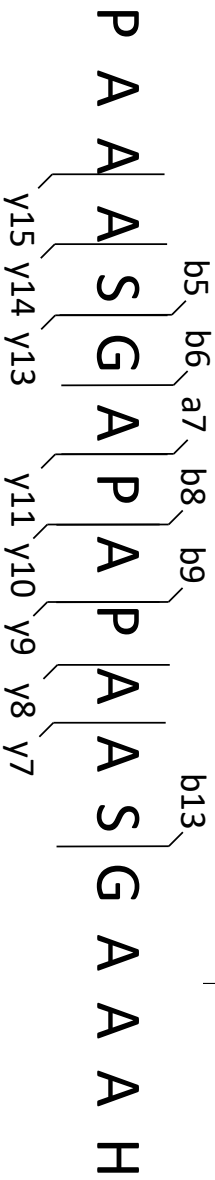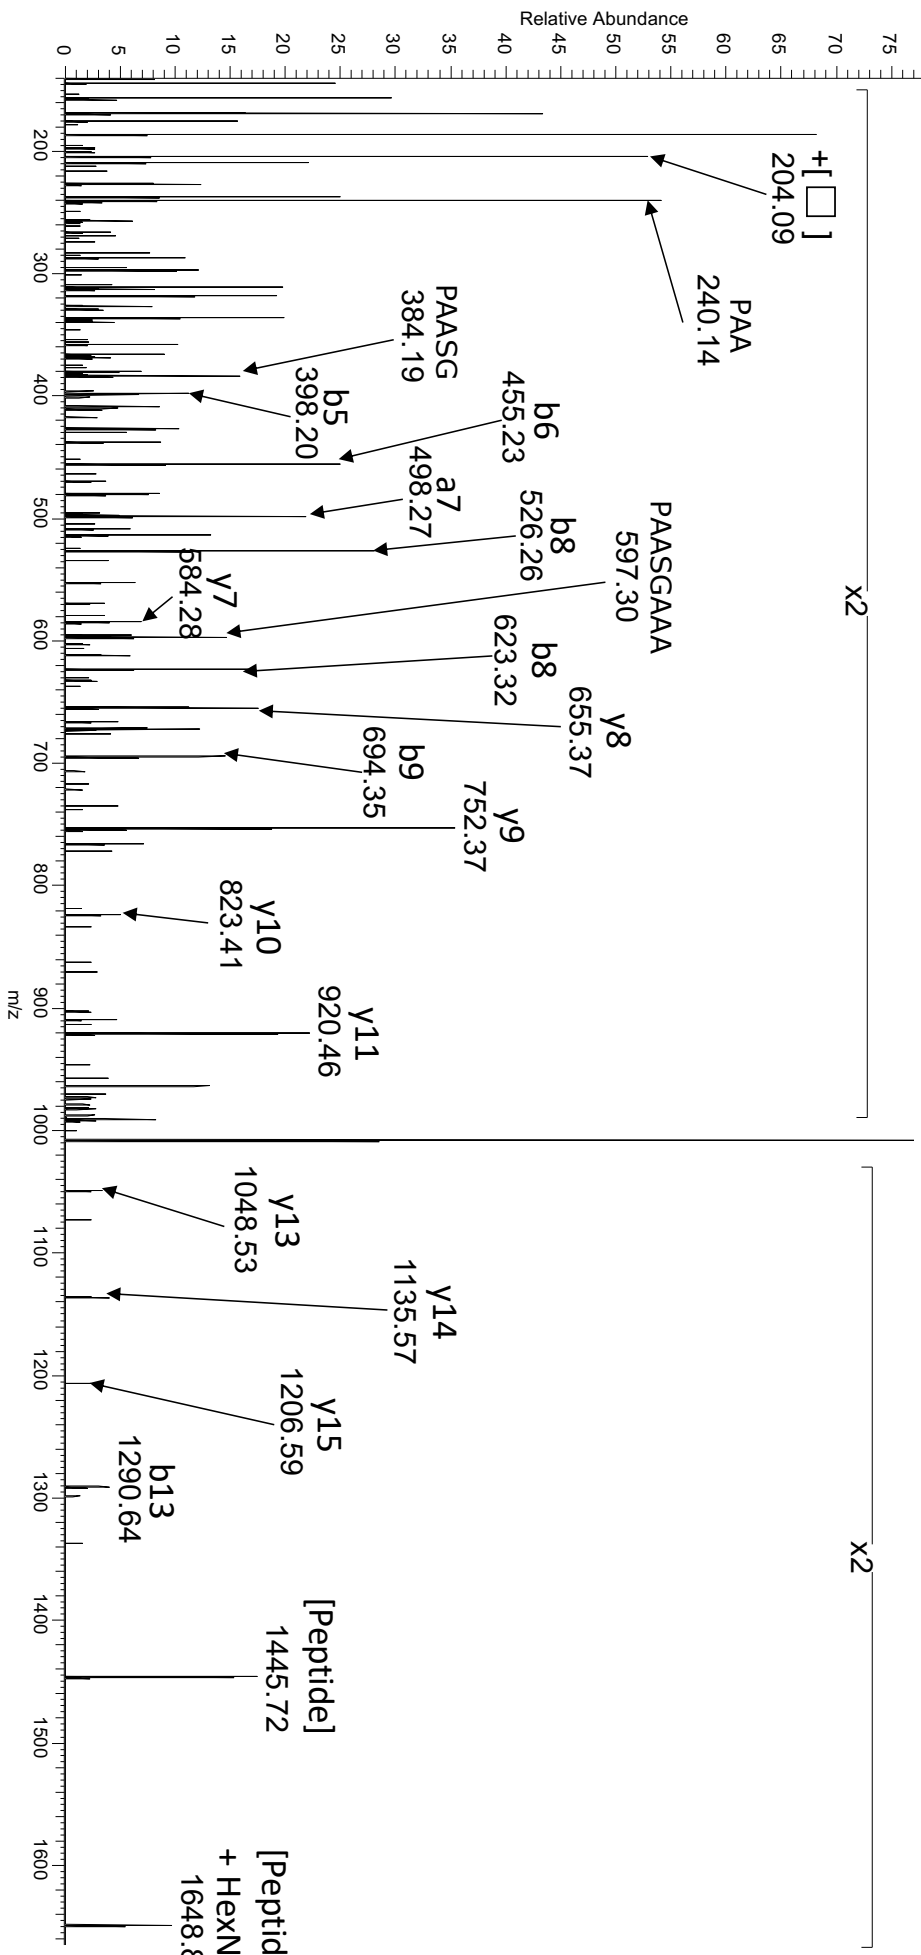

ITMS-CID

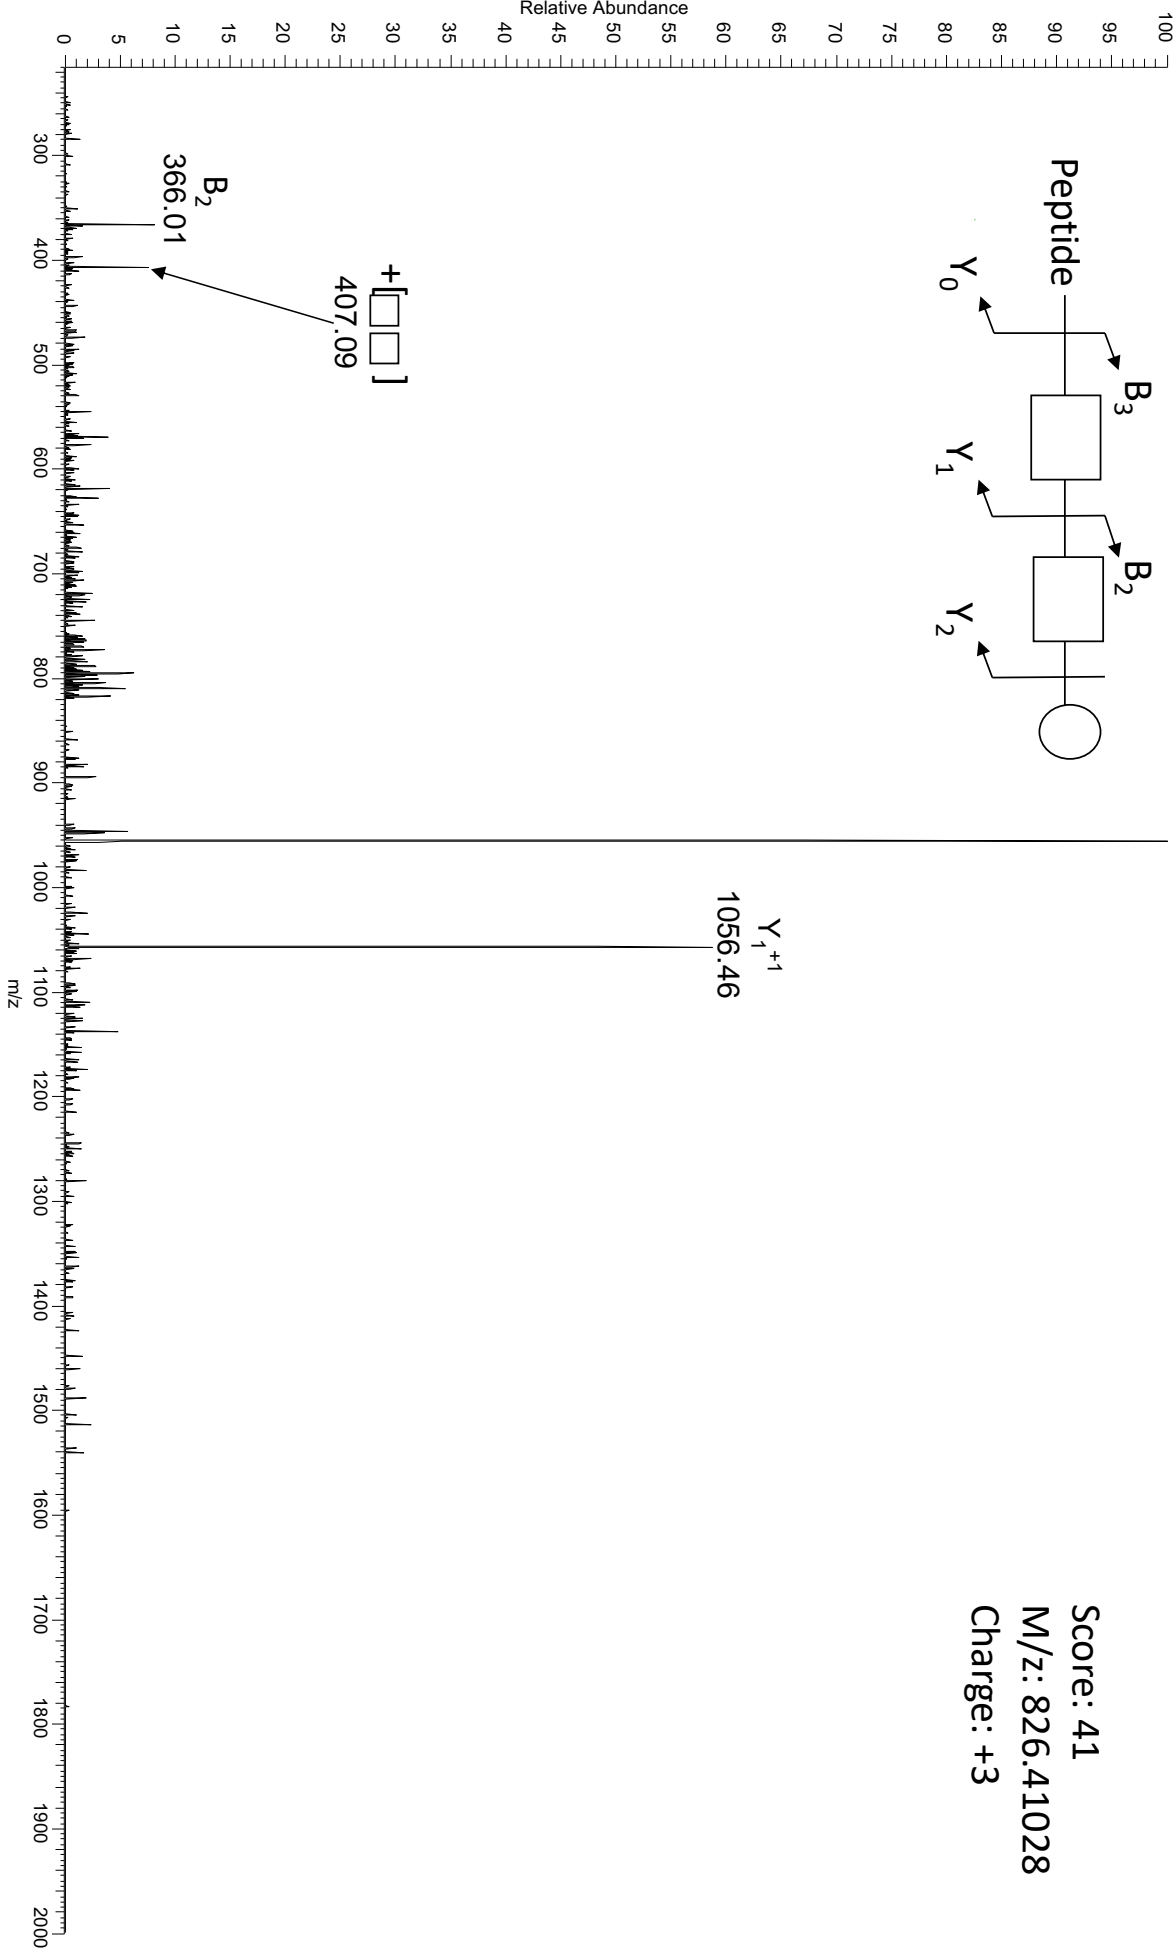

Score: 41

M/z: 826.41028

Charge: +3



[M]<sup>+3</sup>  
826.41

Score: 41

M/z: 826.41028

Charge: +3

D A S G K E P I P L T P Q A A S Q A K

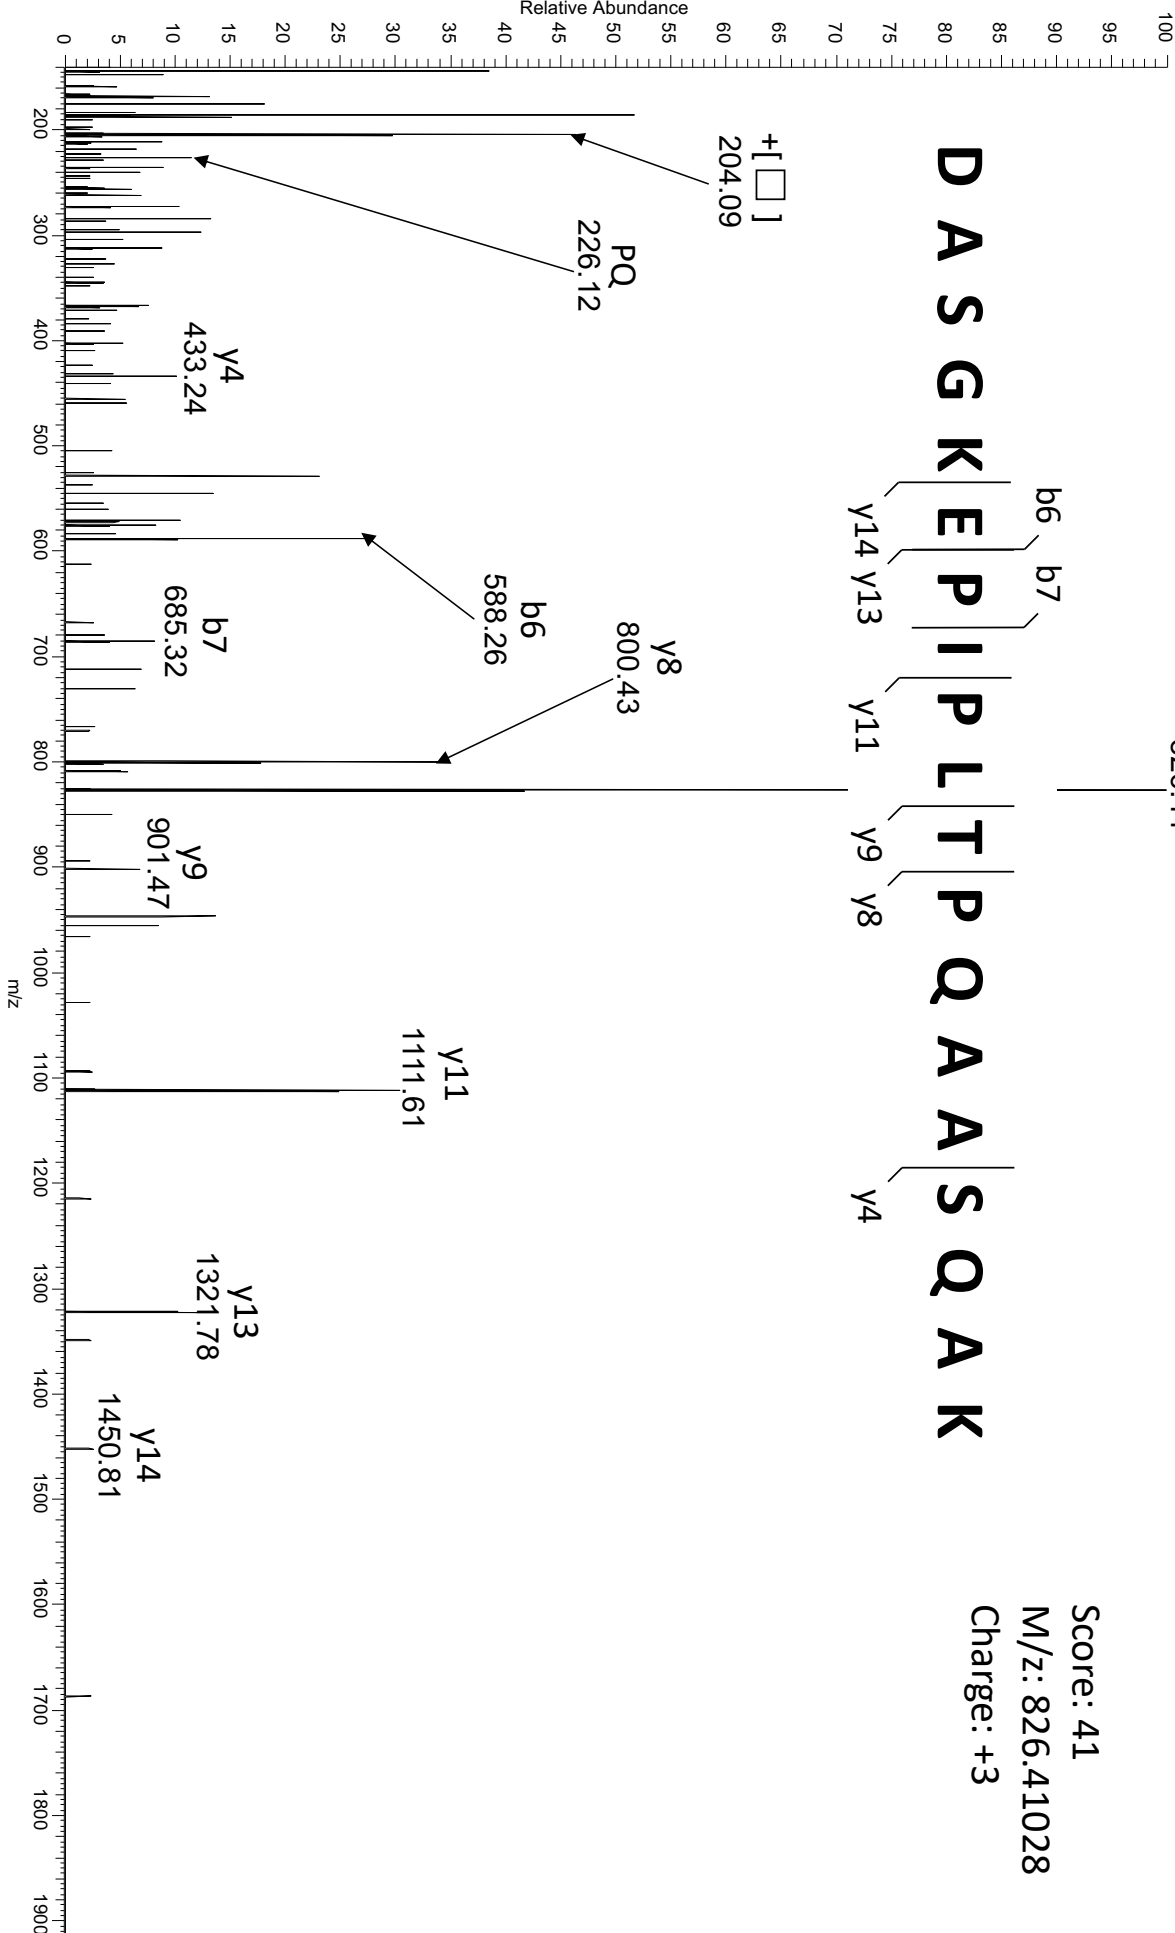

ITMS-CID

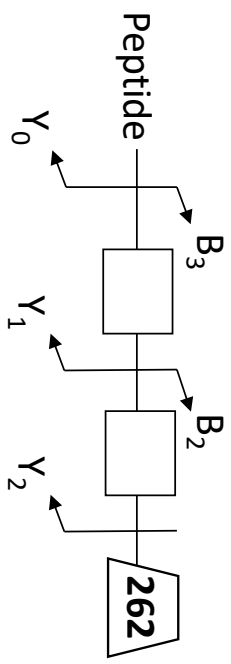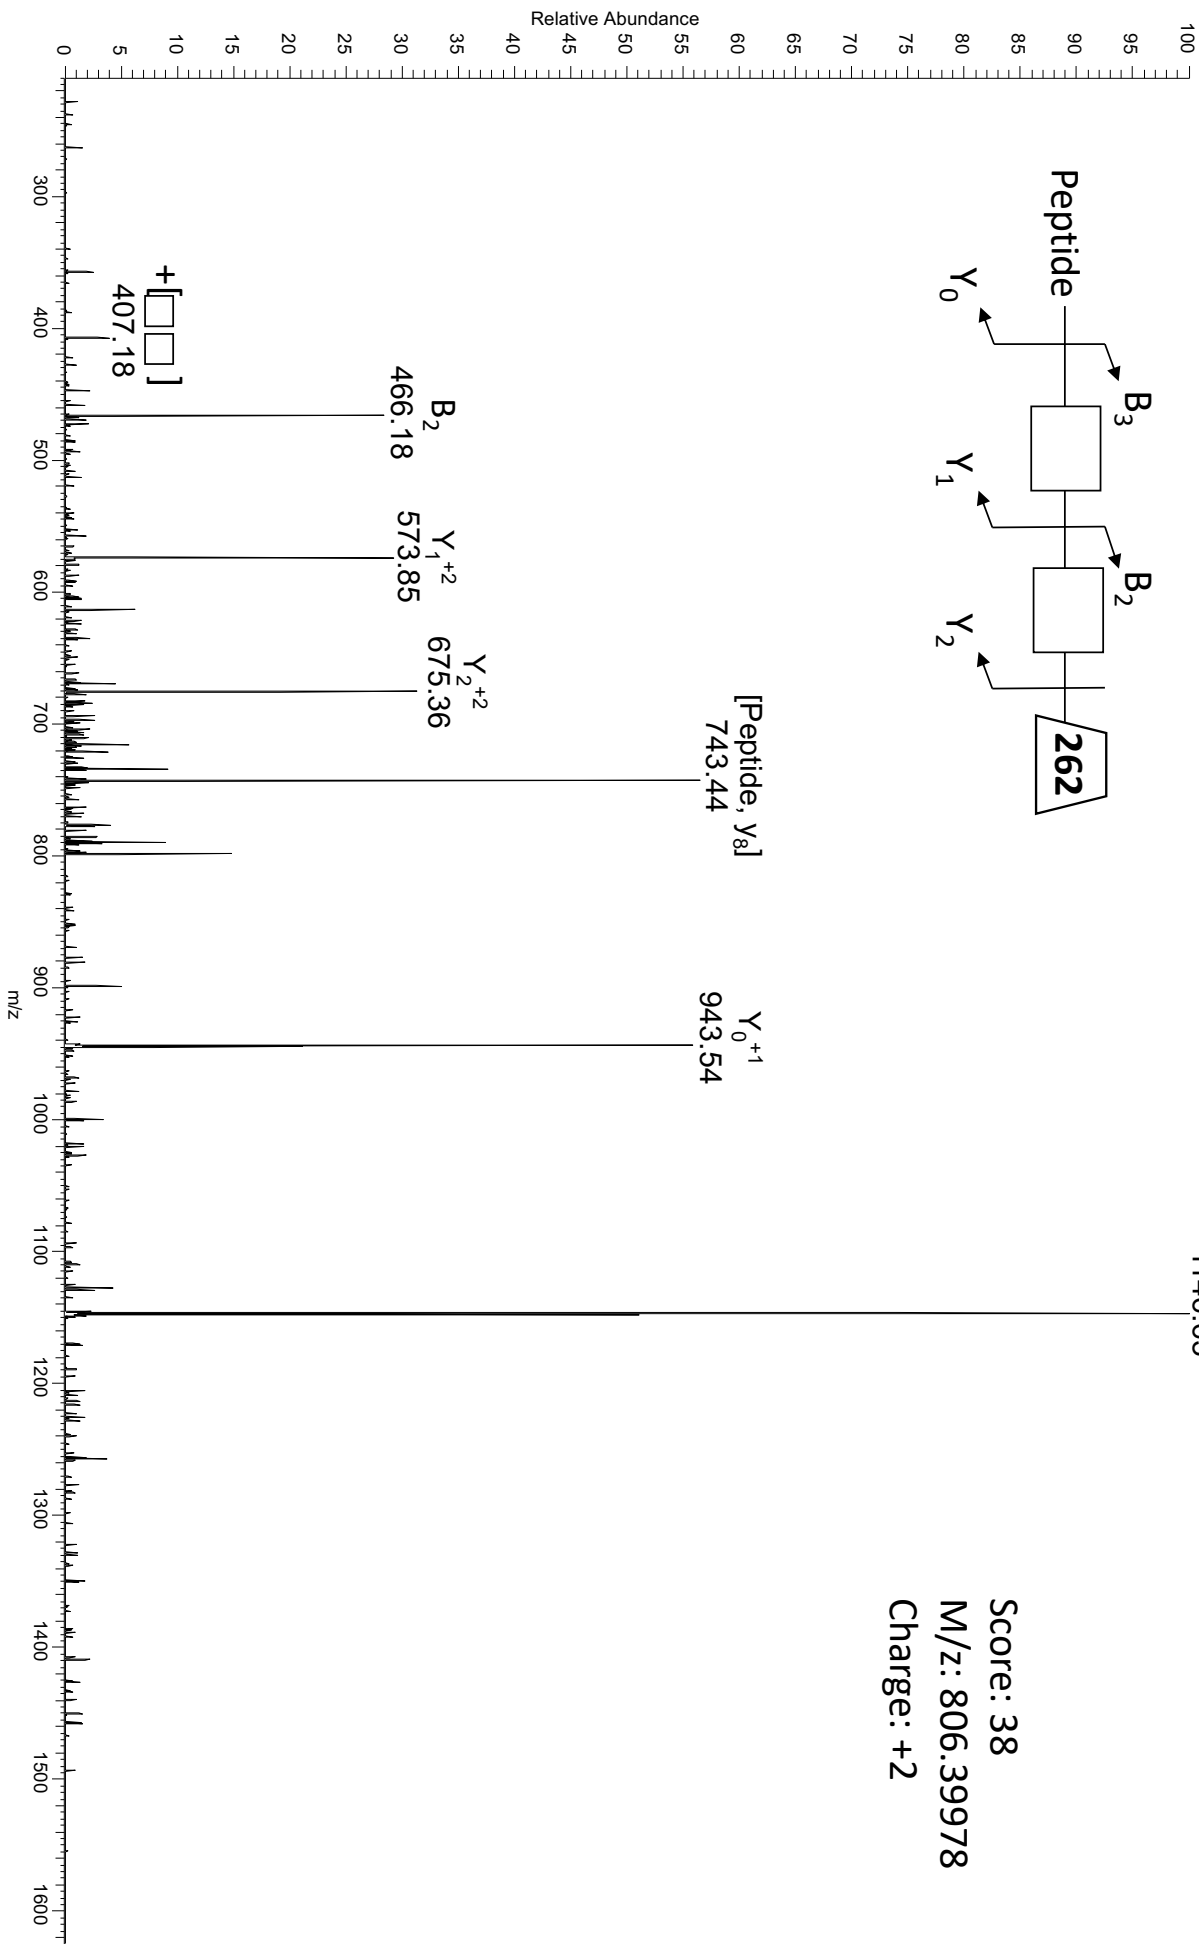

Score: 38  
M/z: 806.39978  
Charge: +2

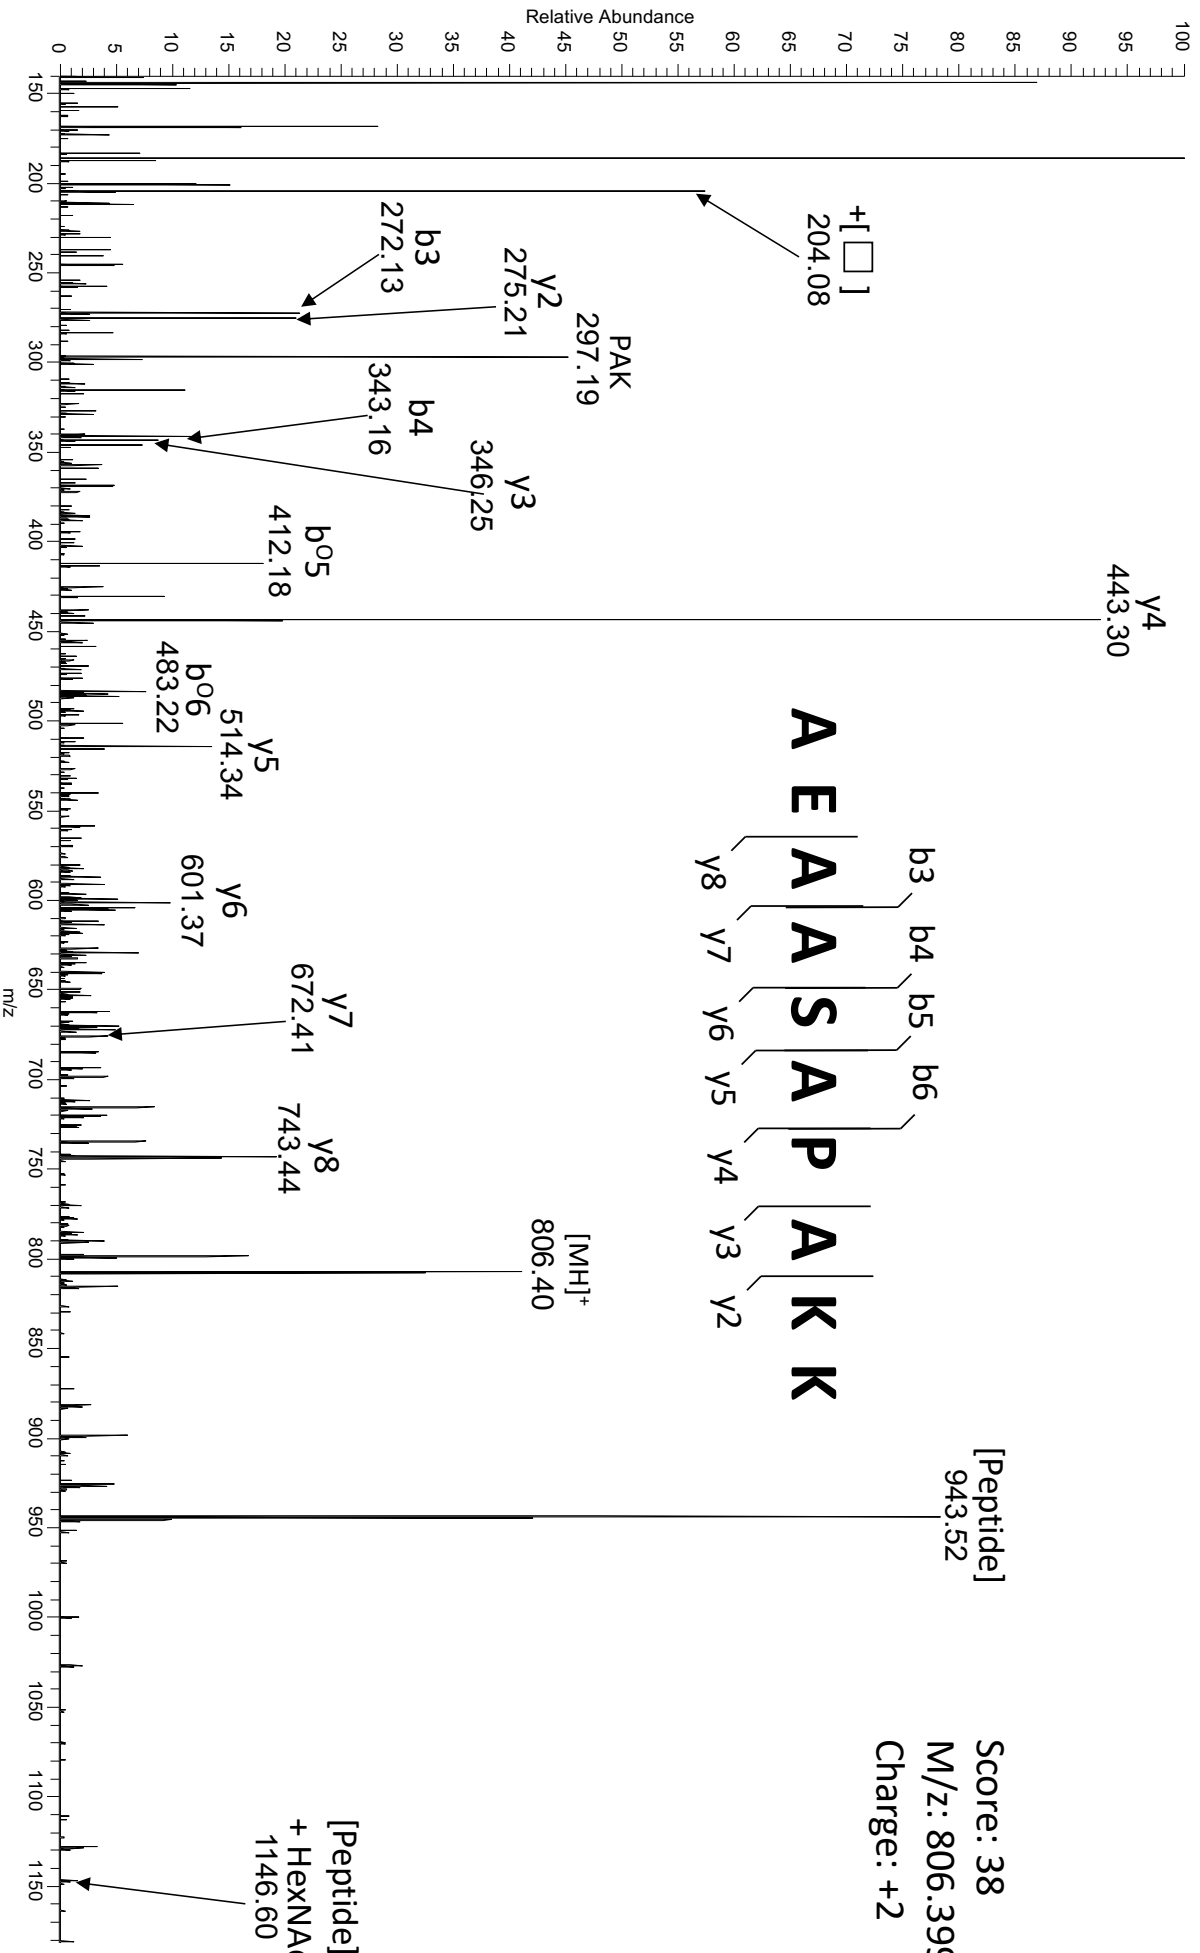

ITMS-CID

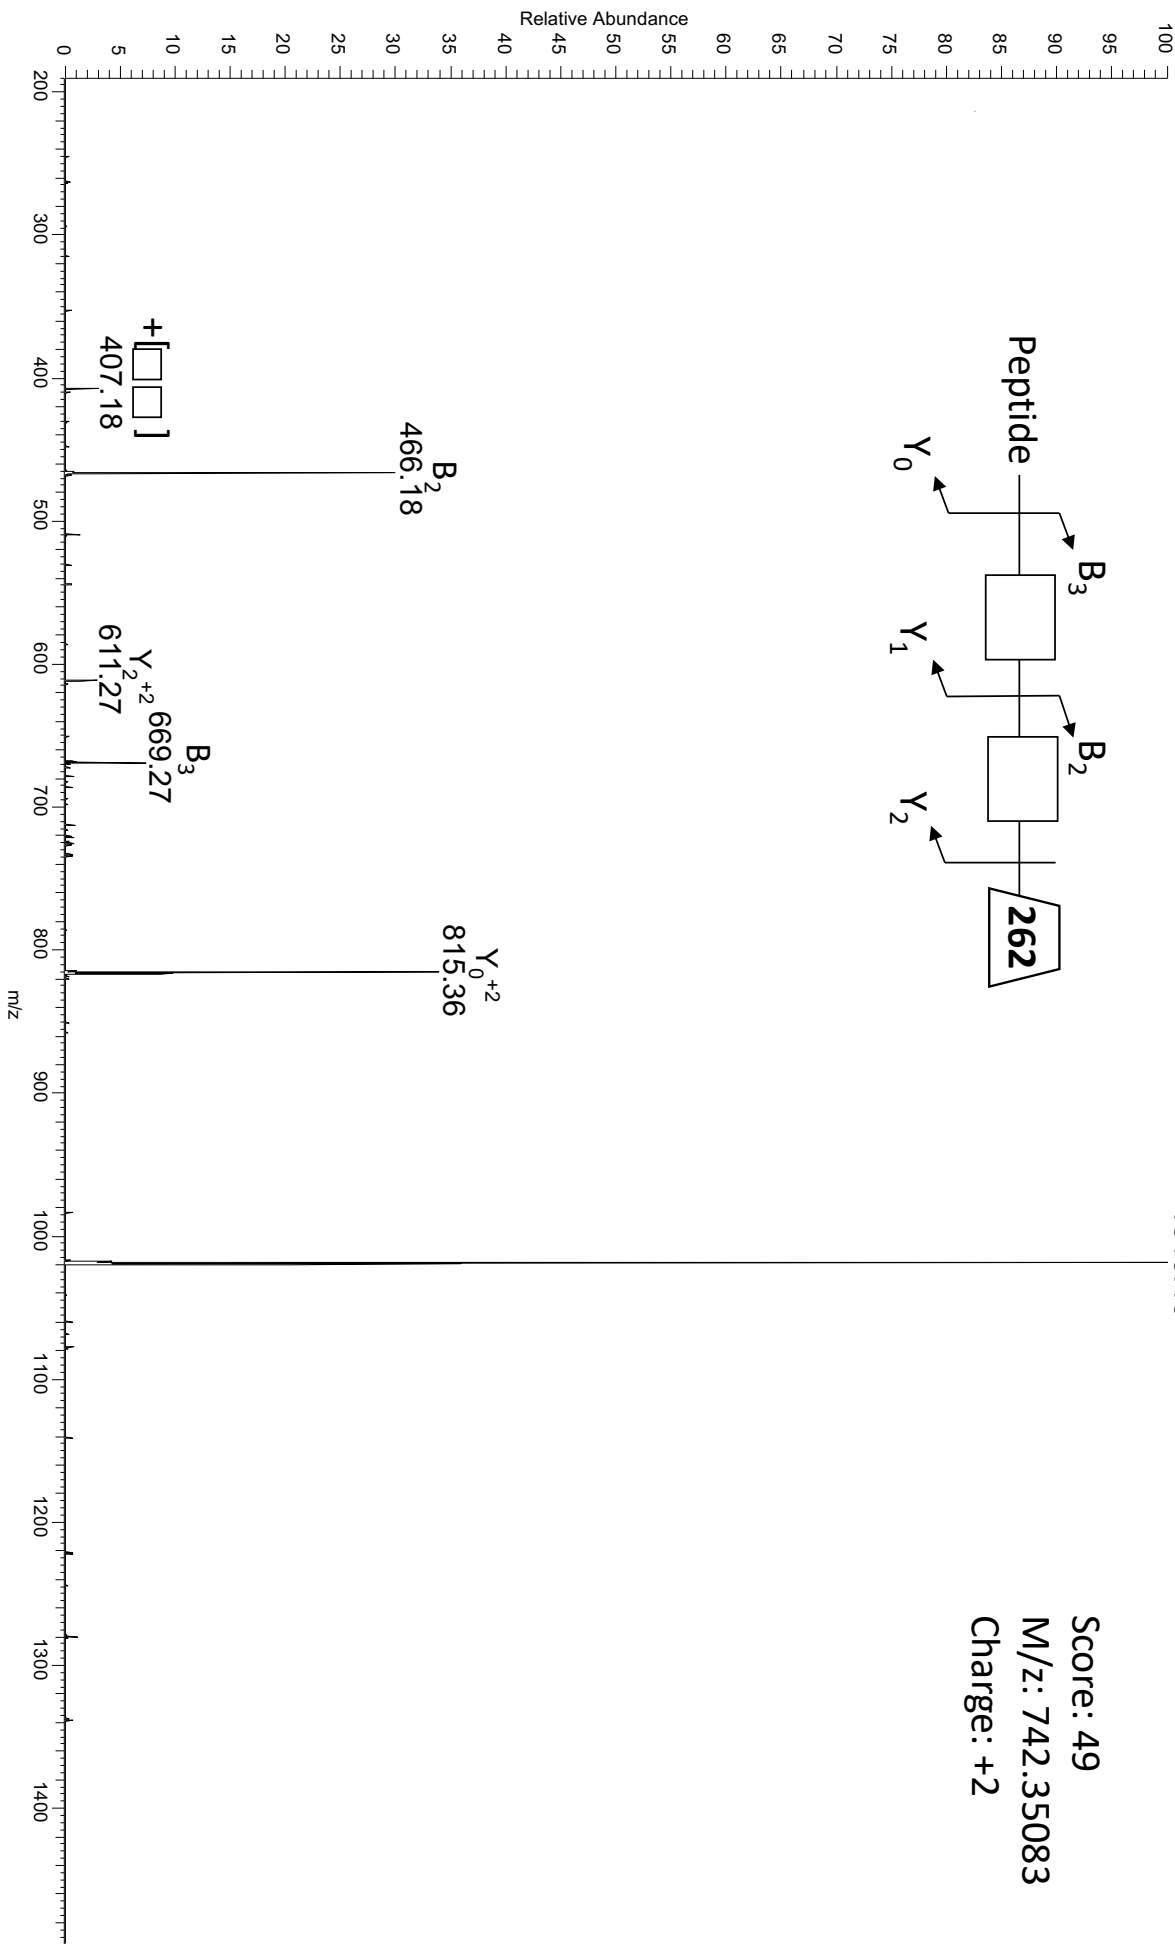

Score: 49  
M/z: 742.35083  
Charge: +2

Score: 49  
M/z: 742.35083  
Charge: +2

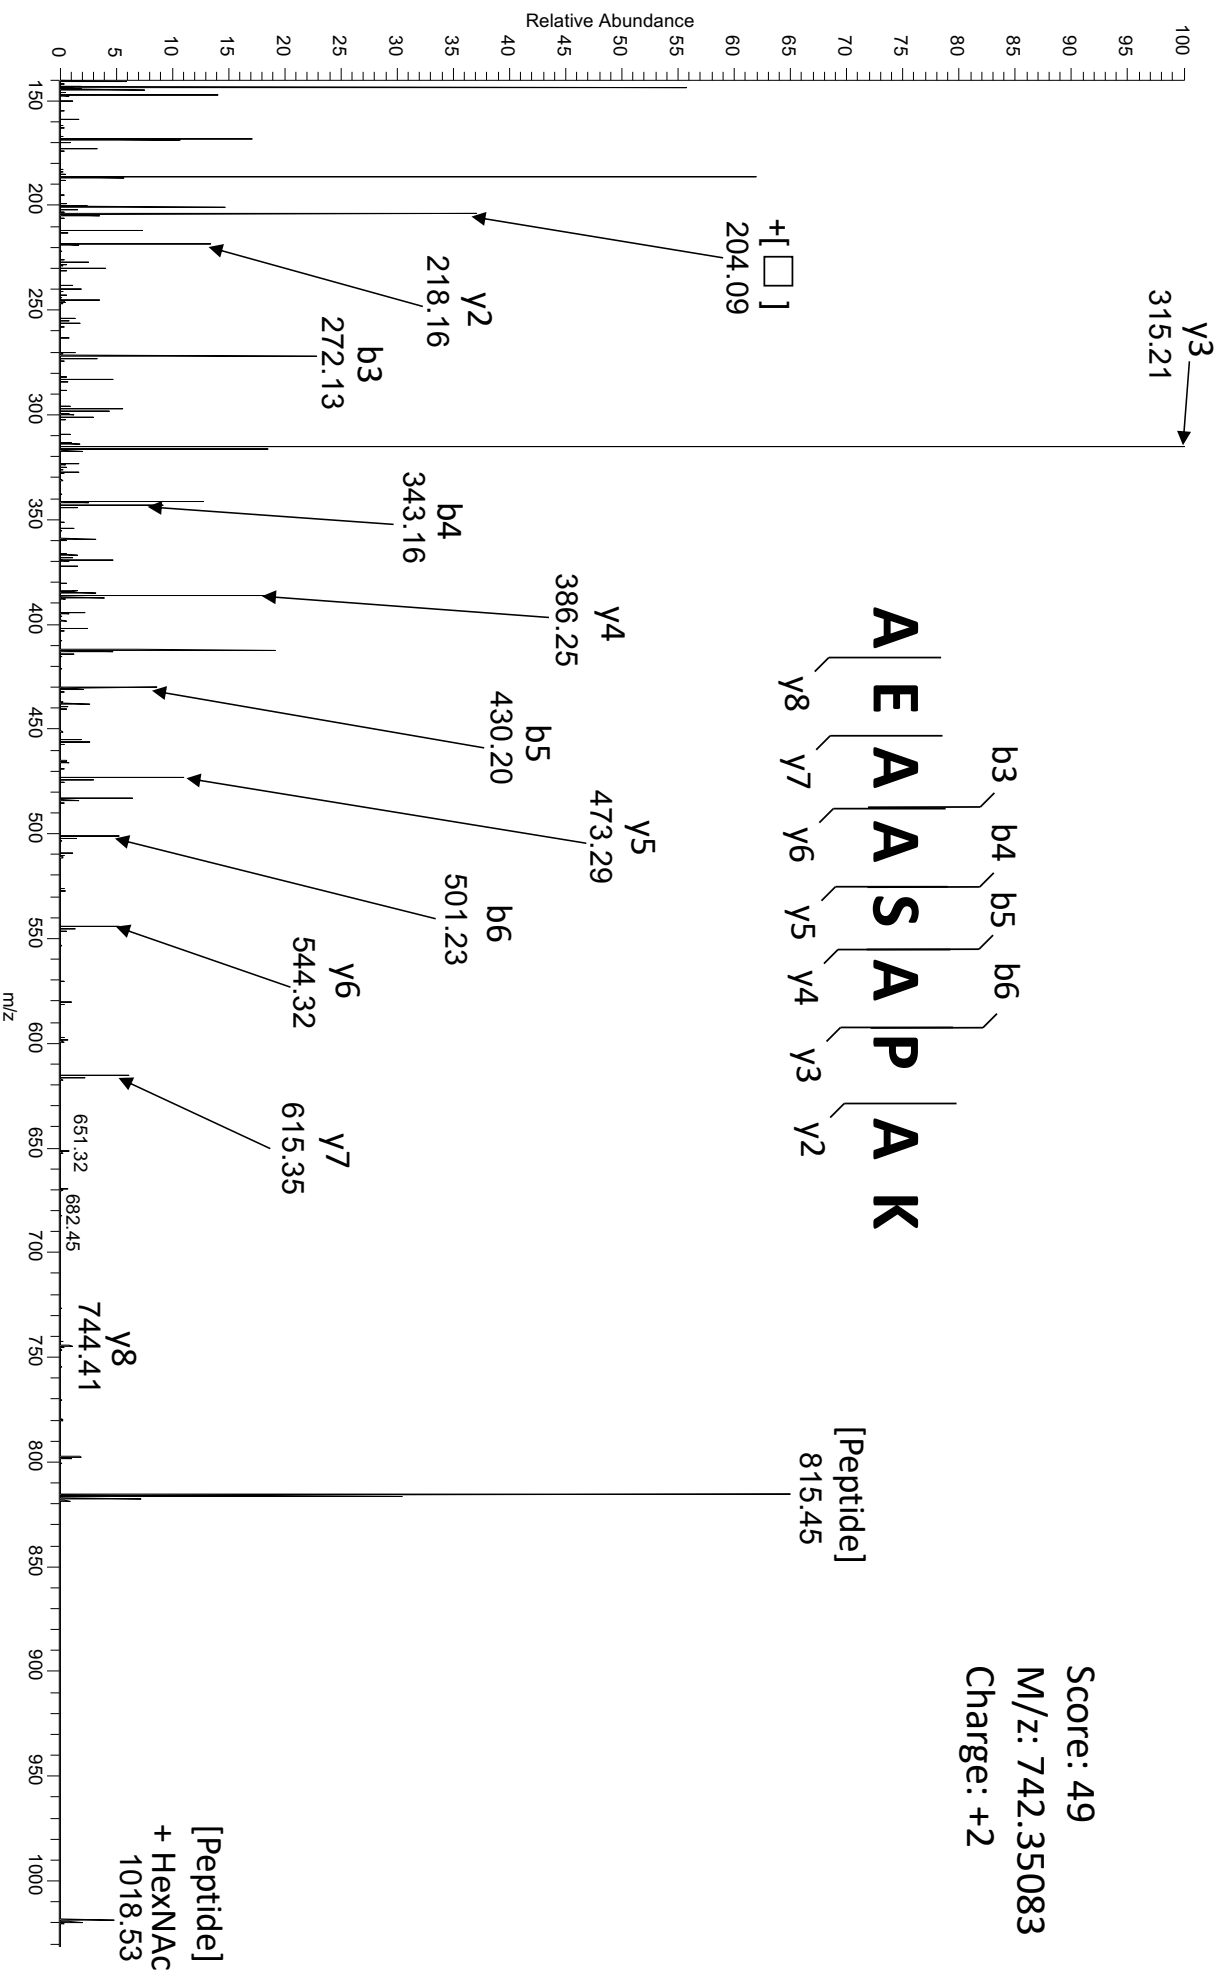

ITMS-CID

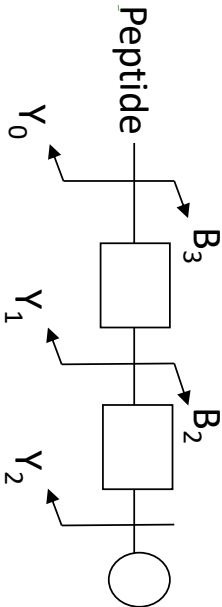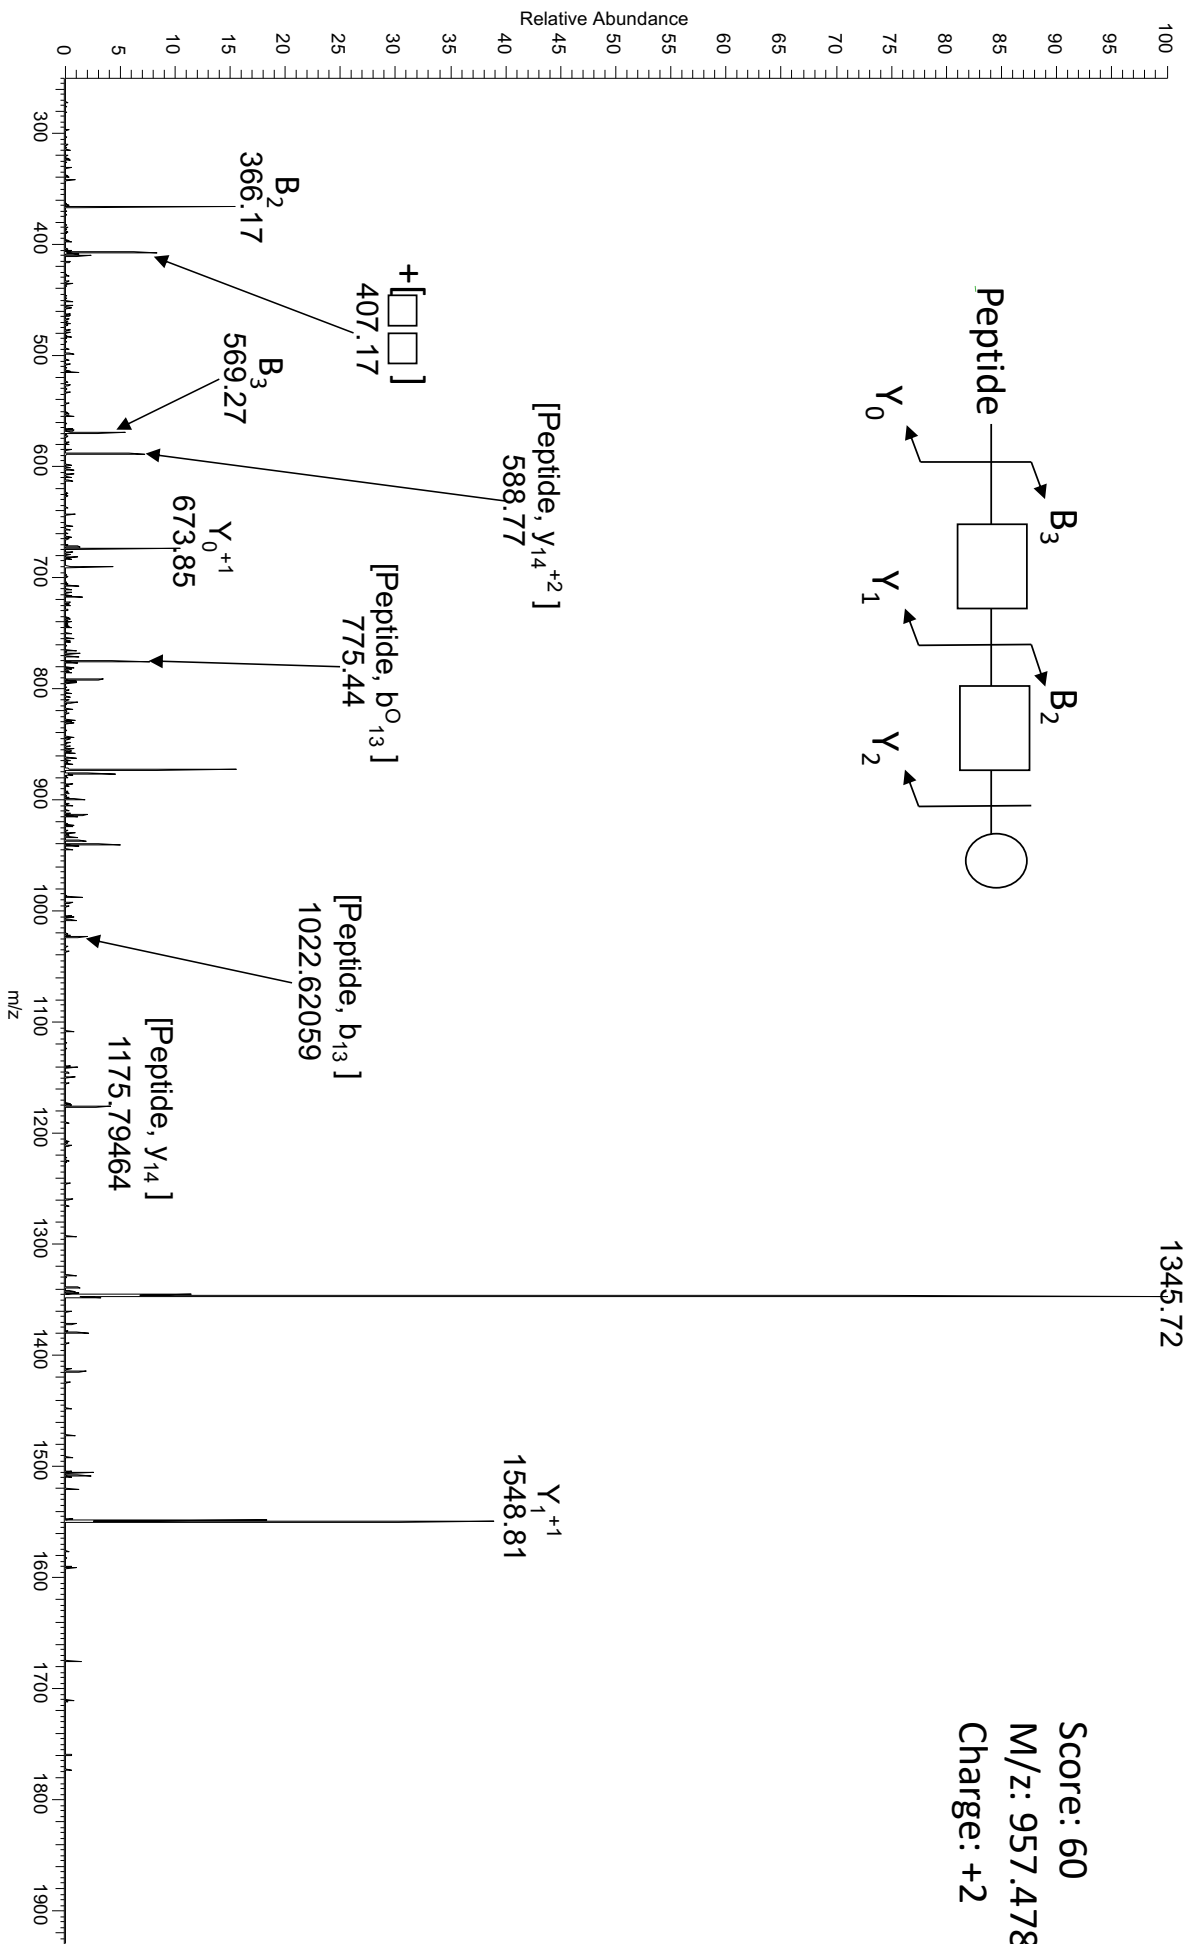

Score: 60  
M/z: 957.47852  
Charge: +2

[Peptide]  
1346.73

Score: 60  
M/z: 957.47852  
Charge: +2

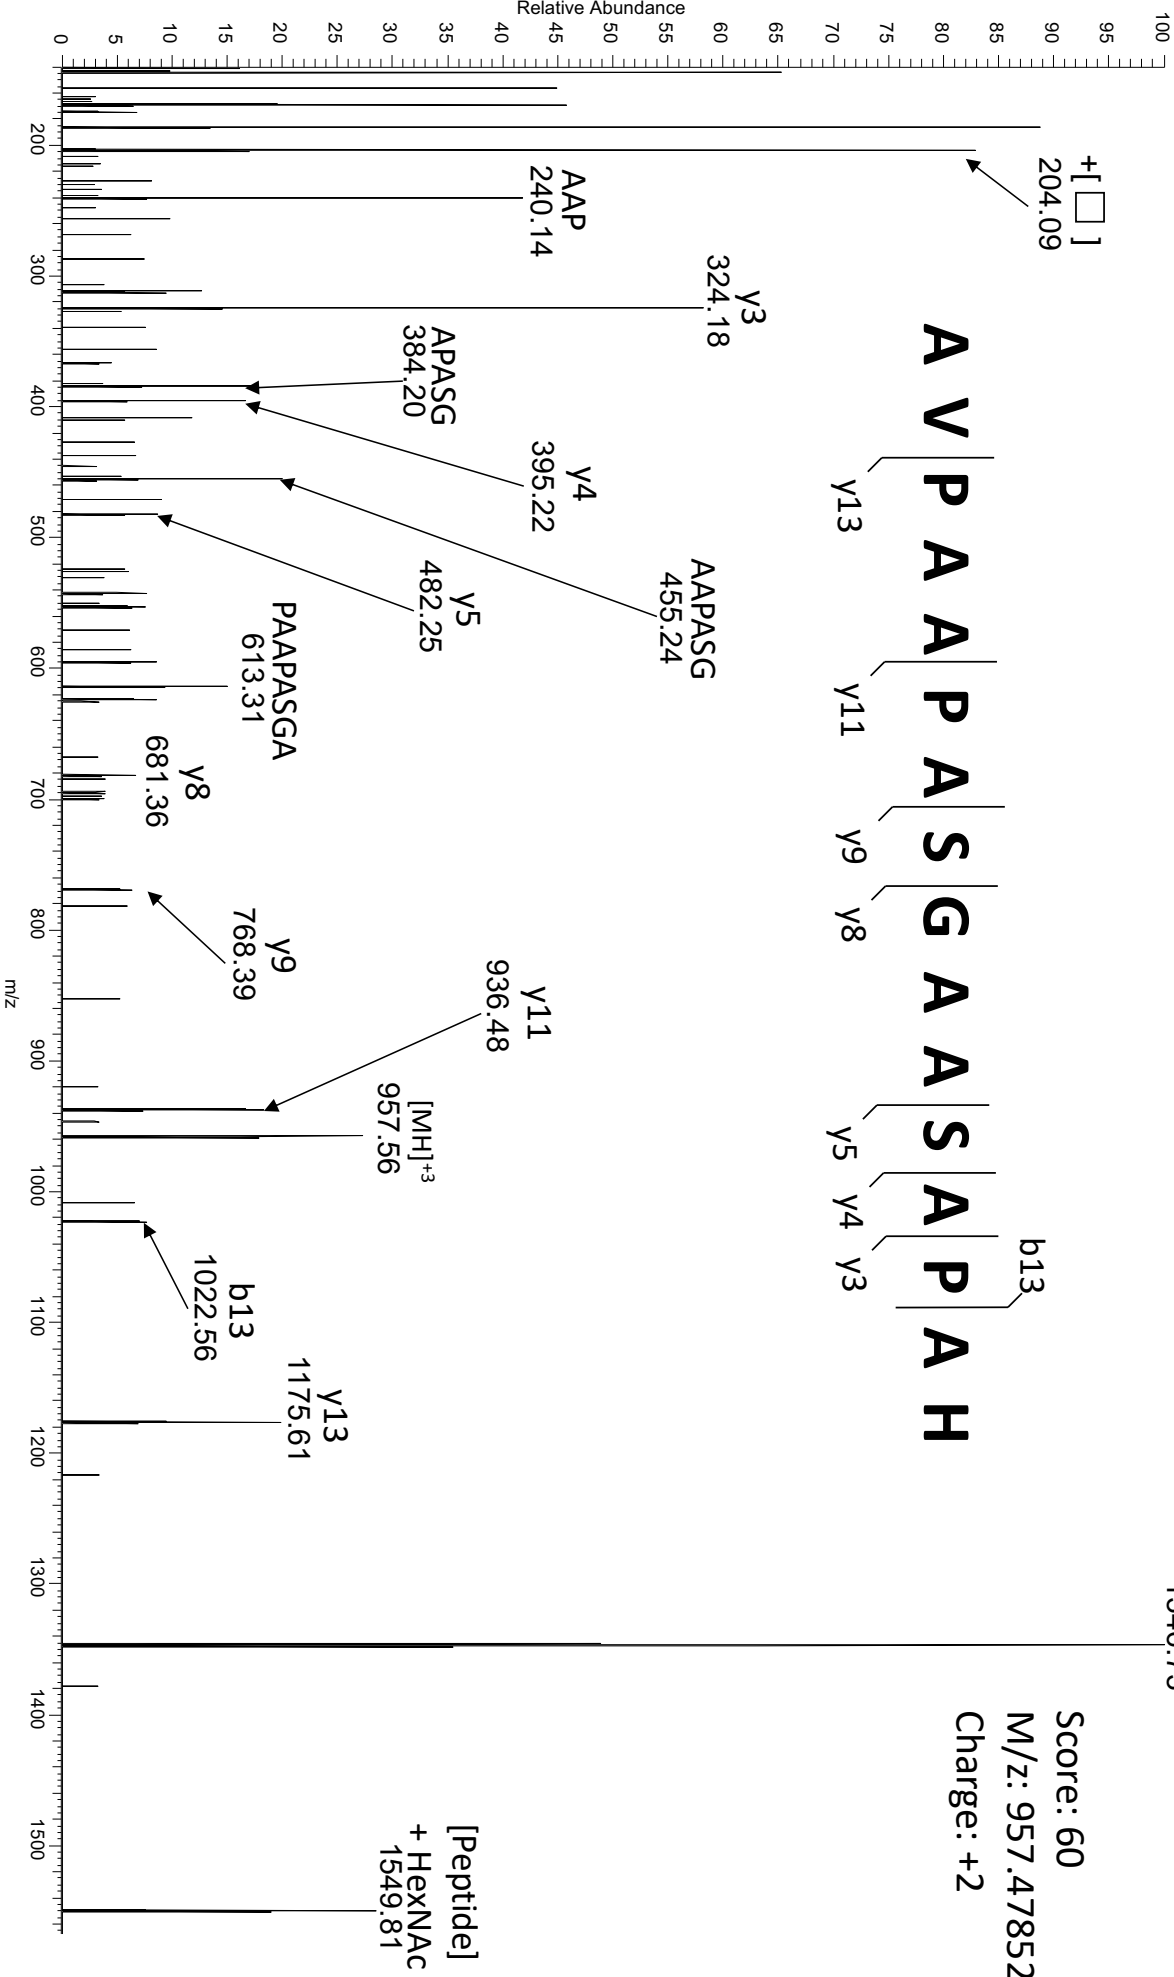

ITMS-CID

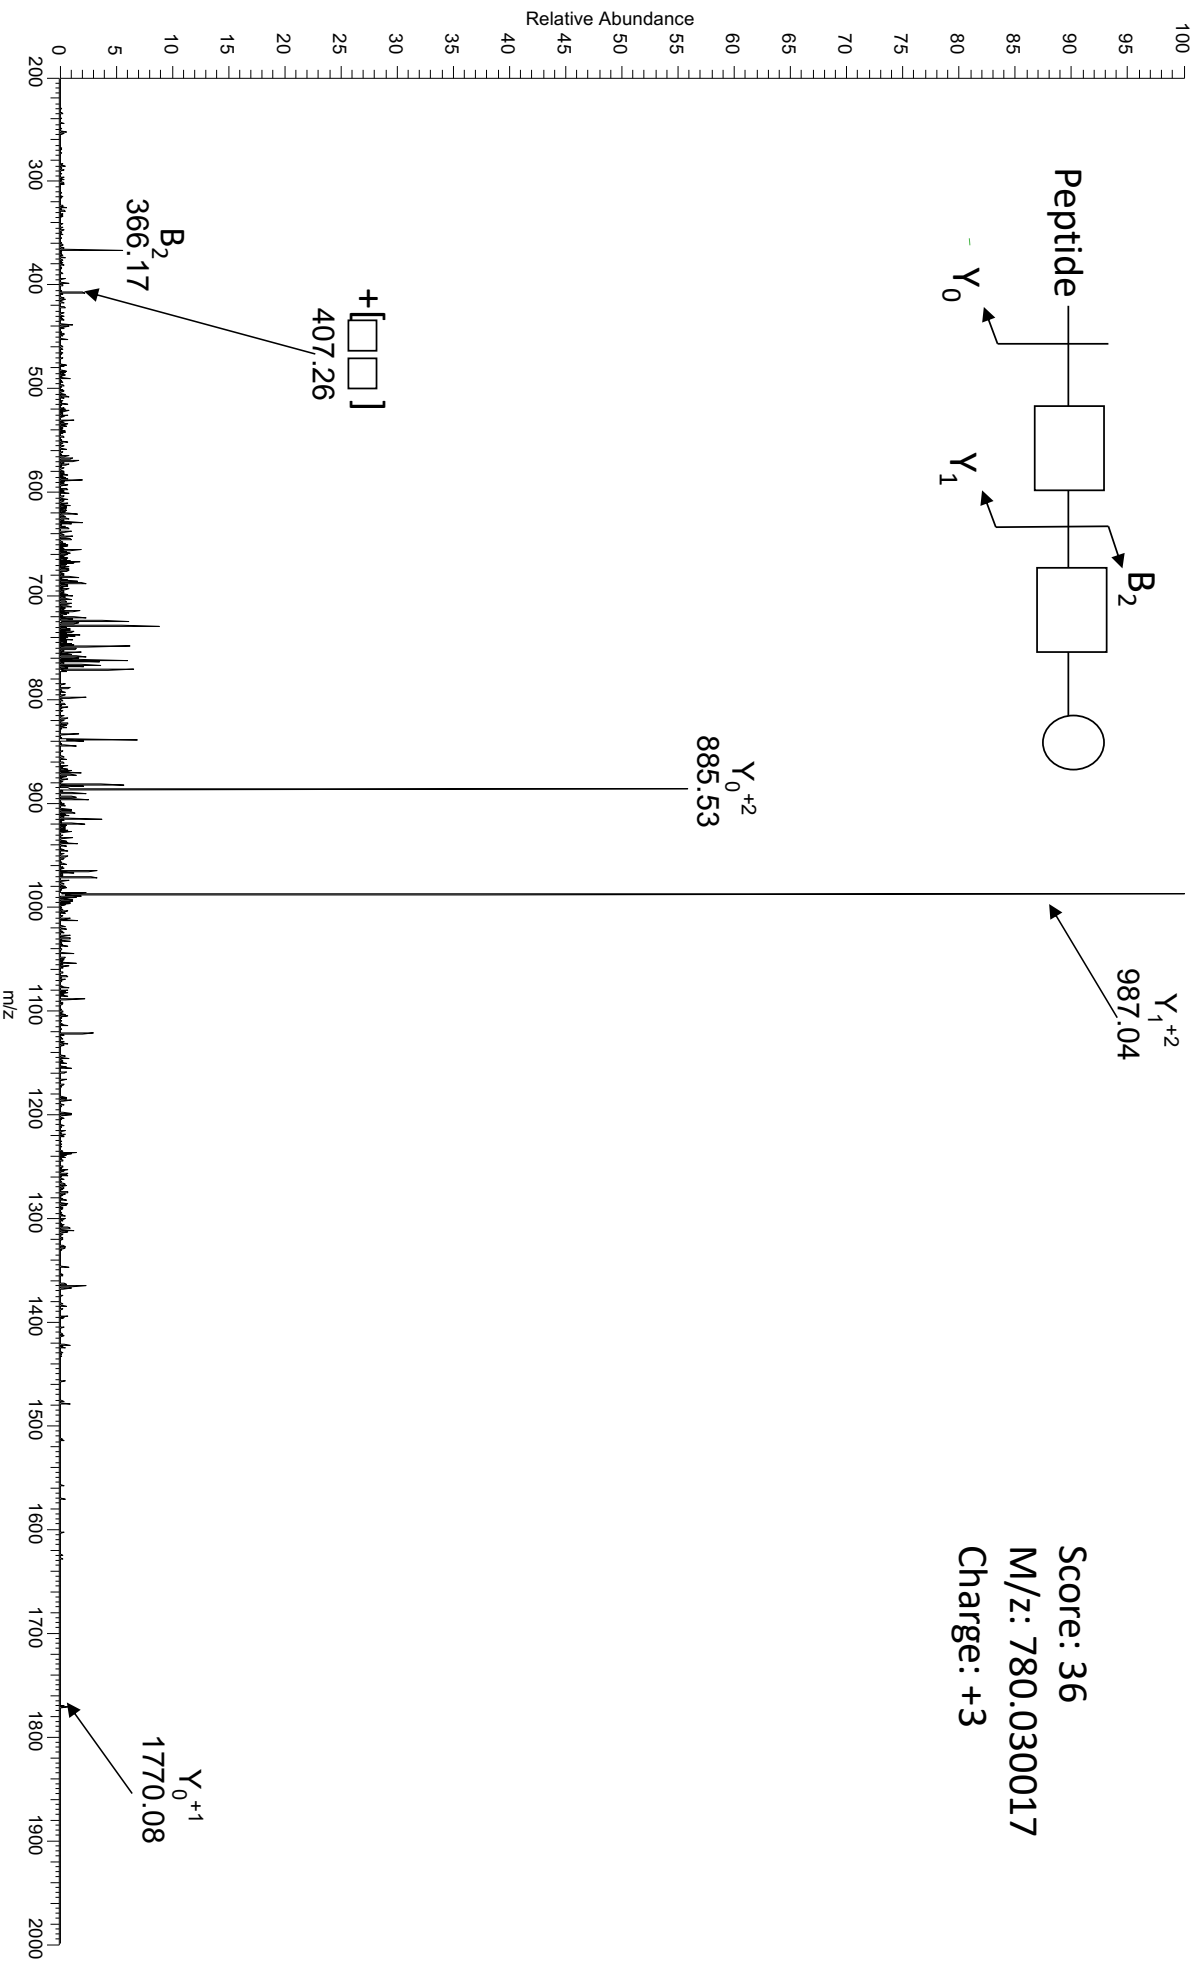

Score: 36  
M/z: 780.030017  
Charge: +3



FTMS-HCD

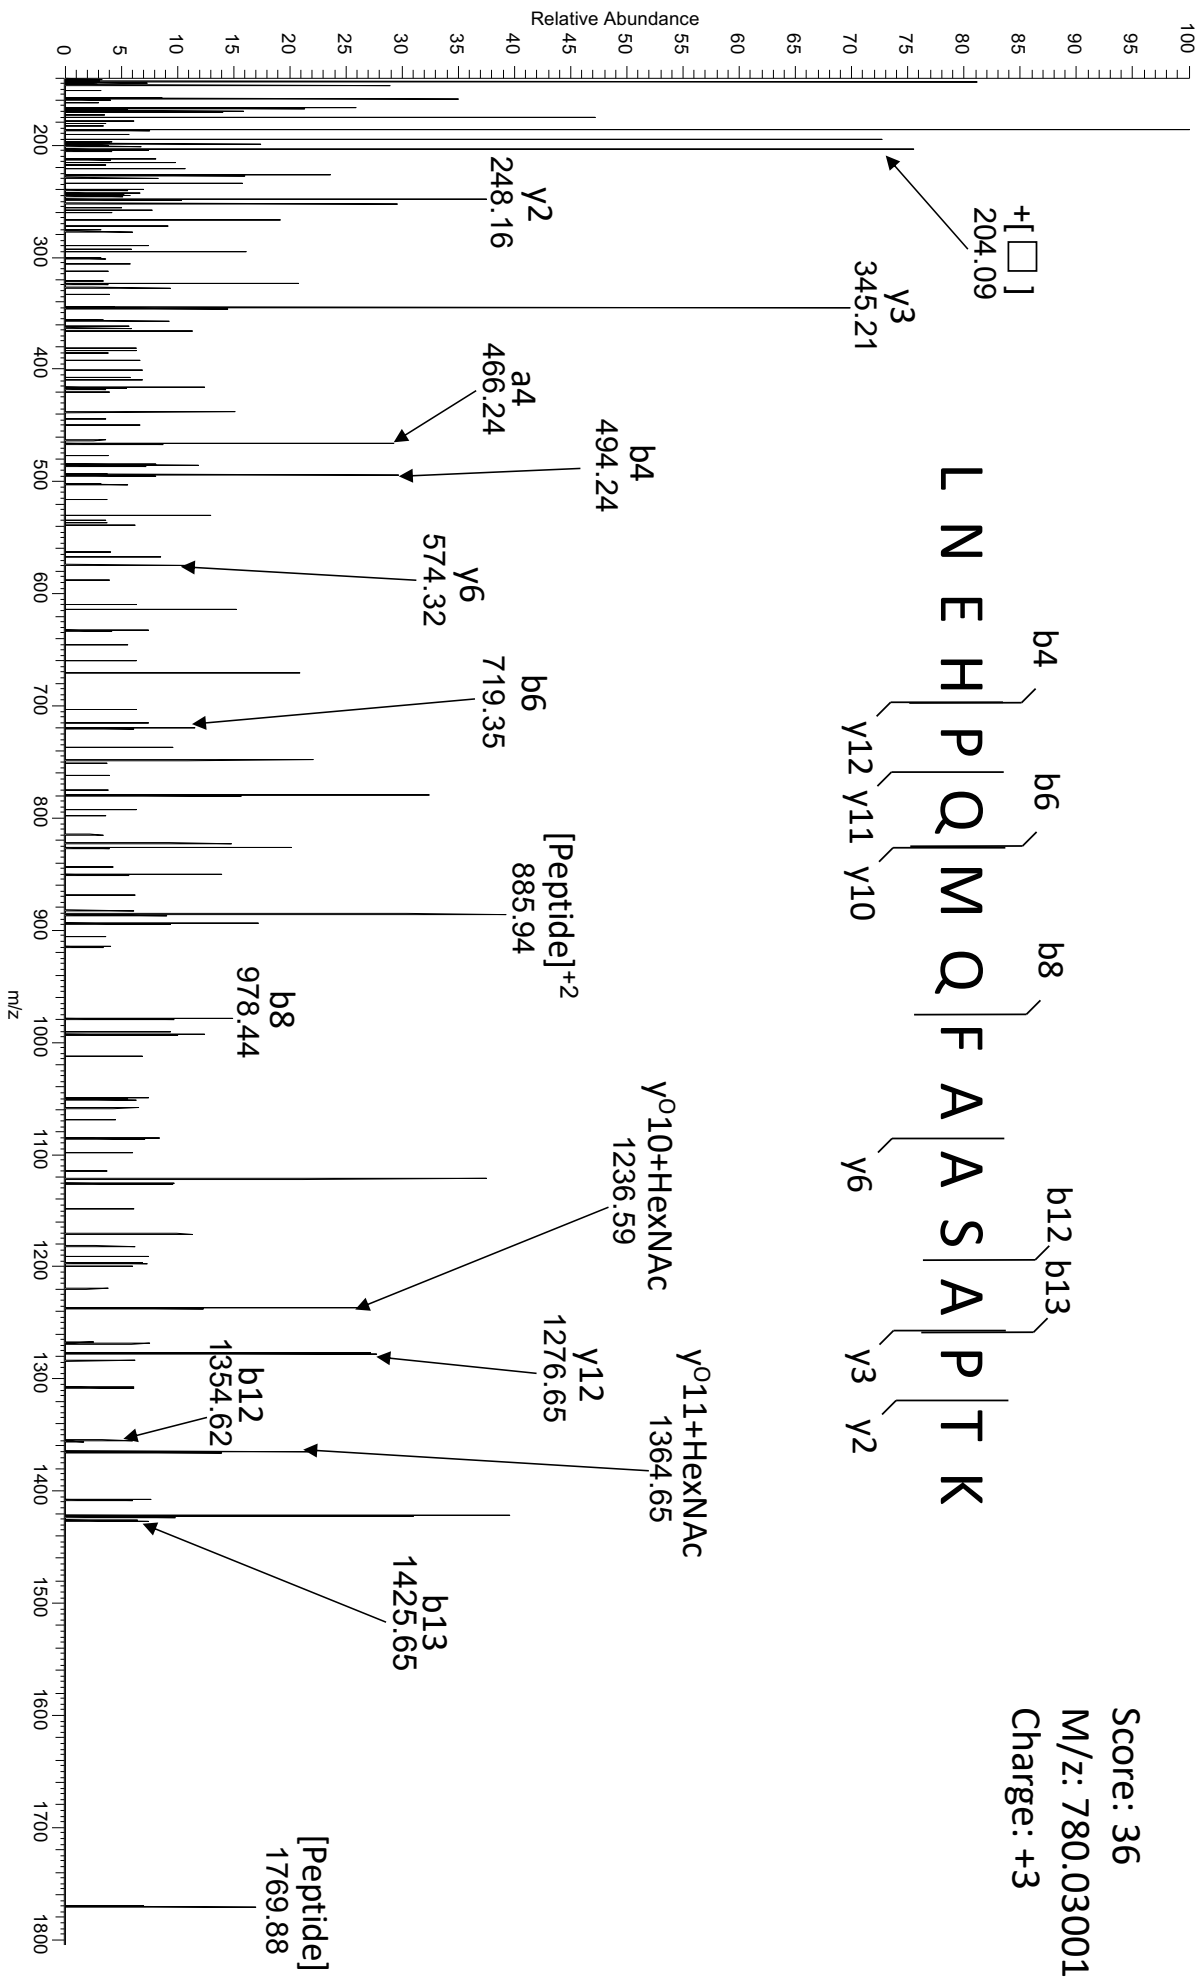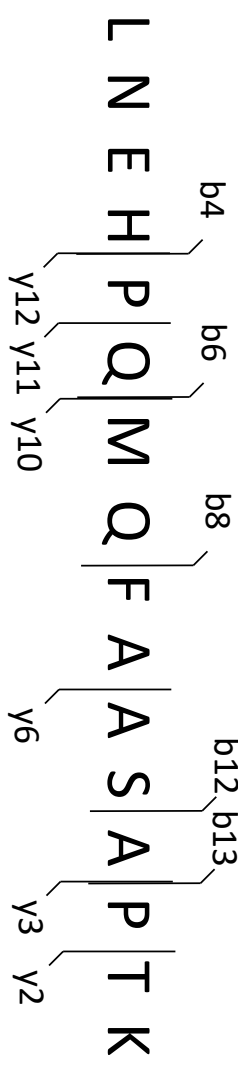

Score: 36  
M/z: 780.030017  
Charge: +3
