# Supplementary material
Source: PubMed Central journal article supplement (PMC6737235)
Supplement: supp_RA119.009671_153342_2_supp_366569_pv1sjg.pdf [file supp_RA119.009671_153342_2_supp_366569_pv1sjg.pdf]

## Supplementary Data 2: Identified *Burkholderia gladioli* MDU1 (AUSMDU00013928) glycopeptides

| Gene         | Protein name                                                                      | Uniprot accession | m/z       | Charge | MH+       | Peptide mass | Glycan mass                | Peptide sequence       | MASCOT ion Score | Page      |
|--------------|-----------------------------------------------------------------------------------|-------------------|-----------|--------|-----------|--------------|----------------------------|------------------------|------------------|-----------|
| bgla_1g02560 | Uncharacterized protein                                                           | F2LHM5            | 858.37762 | 2      | 1715.7544 | 1047.5065    | 668.247946                 | AAAASAAGTNDK           | 83               | 3 and 4   |
| bgla_1g03670 | ABC transporter, periplasmic substrate-binding protein                            | F2LHY4            | 1009.9695 | 2      | 2018.9382 | 1450.7033    | 568.234866                 | AADAGGAKPAAASGAGAH     | 113              | 5 and 6   |
| bgla_1g31160 | Bifunctional uroporphyrinogen-III synthetase/uroporphyrin-III C-methyltransferase | F2LG73            | 763.36084 | 3      | 2288.0809 | 1719.8409    | 568.240032                 | AAHPGDIASEAAATGQPR     | 86               | 7 and 8   |
| bgla_1g32320 | Uncharacterized protein                                                           | F2LGU6            | 895.93744 | 2      | 1790.8741 | 1222.6426    | 568.231486                 | APAAAPEAASAPAK         | 88               | 9 and 10  |
| bgla_1g32320 | Uncharacterized protein                                                           | F2LGU6            | 945.94543 | 2      | 1890.8901 | 1222.6426    | 668.247466                 | APAAAPEAASAPAK         | 80               | 11 and 12 |
| bgla_1g32320 | Uncharacterized protein                                                           | F2LGU6            | 915.75739 | 3      | 2745.2706 | 1508.8067    | 1236.463882<br>(2* 568.23) | ASAPAAAPEAASAPAKK      | 68               | 13 and 14 |
| bgla_1g02400 | Adhesin/hemolysin                                                                 | F2LHK9            | 808.86163 | 2      | 1616.7225 | 948.5109     | 668.211566                 | ASGAKASASAK            | 55               | 15 and 16 |
| bgla_1g28150 | Uncharacterized protein                                                           | F2LBQ5            | 885.3573  | 2      | 1769.7138 | 1201.4725    | 568.241306                 | ASGAM(+16)SNDAM(+16)SK | 48               | 17 and 18 |
| bgla_1g28150 | Uncharacterized protein                                                           | F2LBQ5            | 869.36279 | 2      | 1737.7248 | 1169.4925    | 568.232286                 | ASGAMSNDAMSK           | 77               | 19 and 20 |
| bgla_1g28150 | Uncharacterized protein                                                           | F2LBQ5            | 919.37048 | 2      | 1837.7402 | 1169.4925    | 668.247666                 | ASGAMSNDAMSK           | 82               | 21 and 22 |
| bgla_1g37560 | Uncharacterized protein                                                           | F2LG07            | 968.98877 | 2      | 1936.9767 | 1268.7321    | 668.244646                 | EASIVA AVKPQR          | 55               | 23 and 24 |
| bgla_1g09460 | Uncharacterized protein                                                           | F2LC05            | 786.6925  | 3      | 2358.0759 | 1789.8326    | 568.243312                 | FNEHPQM QFAASAPSK      | 68               | 25 and 26 |
| bgla_1g09460 | Uncharacterized protein                                                           | F2LC05            | 820.0296  | 3      | 2458.0872 | 1789.8326    | 668.254612                 | FNEHPQM QFAASAPSK      | 68               | 27 and 28 |
| bgla_1g09460 | Uncharacterized protein                                                           | F2LC05            | 825.36267 | 3      | 2474.0864 | 1805.8226    | 668.263822                 | FNEHPQM(+16)QFAASAPSK  | 56               | 29 and 30 |

|              |                                            |        |           |   |           |           |            |                            |     |           |
|--------------|--------------------------------------------|--------|-----------|---|-----------|-----------|------------|----------------------------|-----|-----------|
| lolA         | Outer-membrane lipoprotein carrier protein | F2L9H3 | 827.89001 | 4 | 3308.5577 | 2640.2786 | 668.279058 | GASGAMPTVKPTDNSSGTFVFSRPGR | 47  | 31 and 32 |
| bgla_1g28150 | Uncharacterized protein                    | F2LBQ5 | 1087.9504 | 2 | 2174.9001 | 1606.6658 | 568.234286 | HDAMGMSPAASDAMSK           | 110 | 33 and 34 |
| bgla_1g28150 | Uncharacterized protein                    | F2LBQ5 | 1095.9493 | 2 | 2190.8979 | 1622.6558 | 568.242086 | HDAMGMSPAASDAMSK           | 82  | 35 and 36 |
| bgla_1g35490 | Periplasmic protease                       | F2LE35 | 939.47168 | 2 | 1877.9426 | 1309.711  | 568.231566 | PLTAGAAAPSASAPK            | 28  | 37 and 38 |
| bgla_1g23600 | Ankyrin repeat protein                     | F2LDR2 | 704.33496 | 3 | 2111.0033 | 1542.7619 | 568.241392 | IGDGRPASGAGGQNSAK          | 45  | 39 and 40 |
| bgla_1g28150 | Uncharacterized protein                    | F2LBQ5 | 801.67279 | 3 | 2403.0168 | 1734.7608 | 668.255982 | KHDAMGMSPAASDAMSK          | 138 | 41 and 42 |
| bgla_1g28150 | Uncharacterized protein                    | F2LBQ5 | 1151.9988 | 2 | 2302.9968 | 1734.7608 | 568.235966 | KHDAMGMSPAASDAMSK          | 108 | 43 and 44 |
| bgla_1g22150 | Uncharacterized protein                    | F2LA58 | 988.47693 | 2 | 1975.9531 | 1407.7227 | 568.230366 | KPAAPAADAASAPAAQ           | 66  | 45 and 46 |
| bgla_1g22150 | Uncharacterized protein                    | F2LA58 | 1038.4868 | 2 | 2075.9728 | 1407.7227 | 668.250146 | KPAAPAADAASAPAAQ           | 38  | 47 and 48 |
| bgla_1g35490 | Periplasmic protease                       | F2LE35 | 989.48334 | 2 | 1977.9659 | 1309.711  | 668.254886 | PLTAGAAAPSASAPK            | 53  | 49 and 50 |
| bgla_1g09580 | Uncharacterized protein                    | F2LC16 | 888.78162 | 3 | 2664.3433 | 2096.0982 | 568.245072 | SLSNQAPAASAVAAAPIDADKK     | 92  | 51 and 52 |
| bgla_1g09580 | Uncharacterized protein                    | F2LC16 | 922.12    | 3 | 2764.3584 | 2096.0982 | 668.260212 | SLSNQAPAASAVAAAPIDADKK     | 110 | 53 and 54 |
| bgla_1g09580 | Uncharacterized protein                    | F2LC16 | 822.07099 | 3 | 2464.2114 | 1895.9821 | 568.229285 | SNQAPAASAVAAAPIDADKK       | 86  | 55 and 56 |
| bgla_2g17040 | Uncharacterized protein                    | F2LPV7 | 885.414   | 3 | 2654.2404 | 1985.9774 | 668.263012 | TDAAAPGADAAAAASTPTKAEK     | 86  | 57 and 58 |
| bgla_1g22150 | Uncharacterized protein                    | F2LA58 | 797.04413 | 3 | 2389.1308 | 1720.8725 | 668.258302 | TPASAAAAAASPAAHAAR         | 104 | 59 and 60 |

**Supplementary Data 2. Identified *Burkholderia gladioli* MDU1 (AUSMDU00013928) Glycopeptides.** A total of 29 unique glycopeptides were observed within whole cell proteome samples of *B. gladioli* MDU1. For assigned glycopeptides the gene, protein name, uniprot accession (mapped to *B. gladioli* BSR3), observed m/z, charge state, MH<sup>+</sup> mass, peptide mass, glycan, peptide sequence, MASCOT ion score and containing annotated CID and HCD data are provided.

ITMS-CID

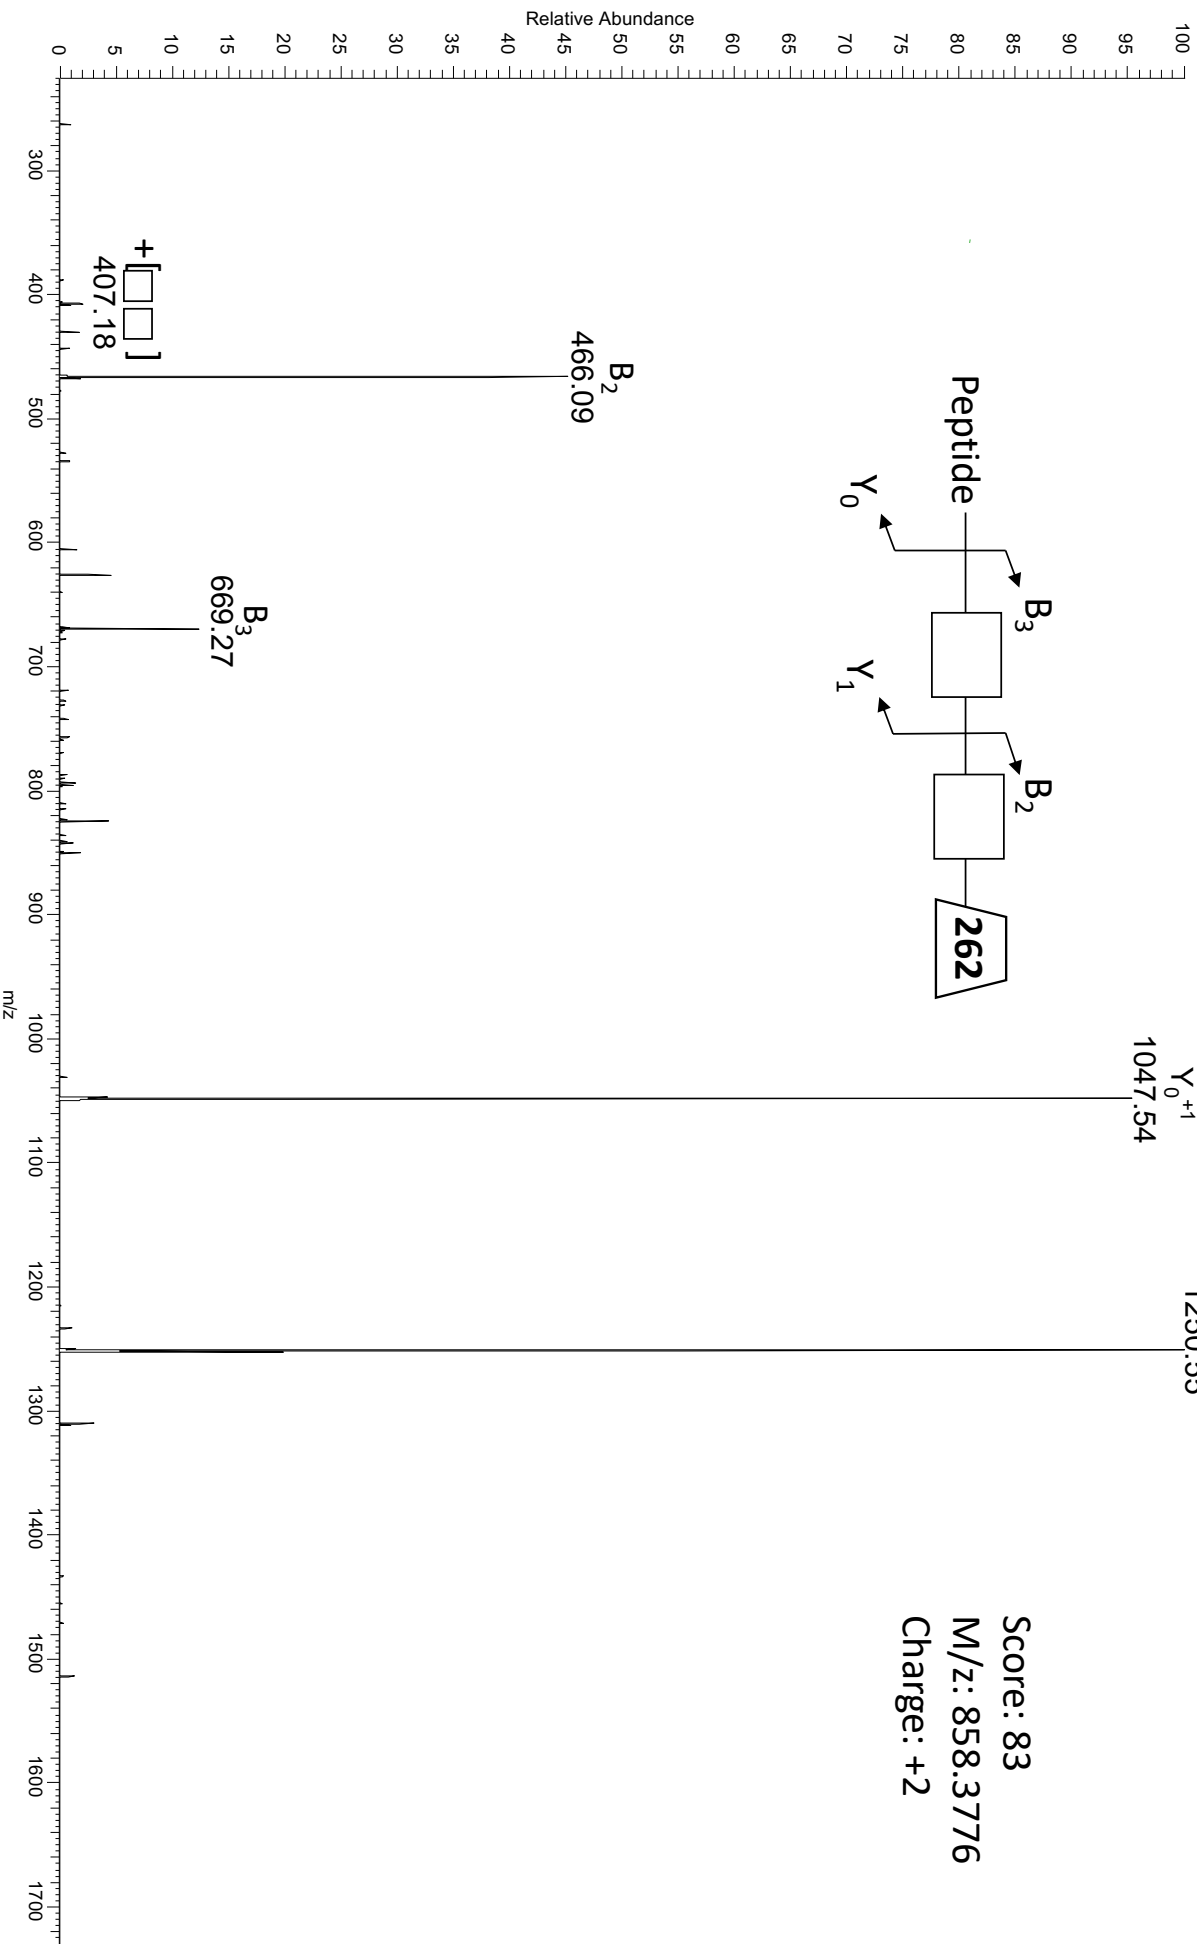

Score: 83

M/z: 858.3776

Charge: +2

1047.51355

### MASCOT assignment

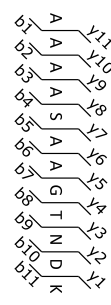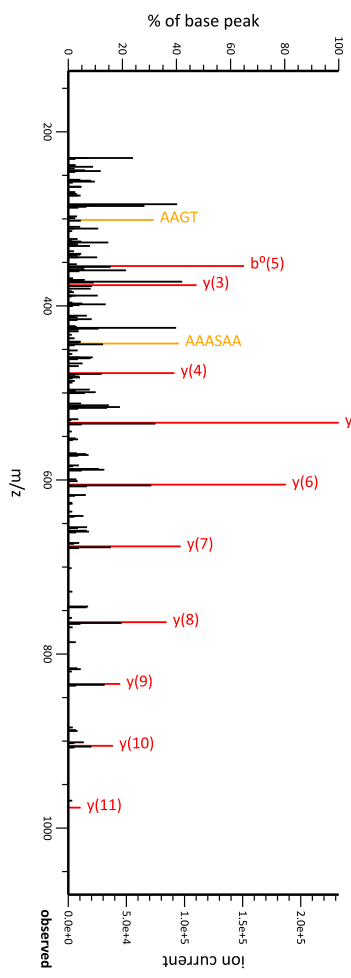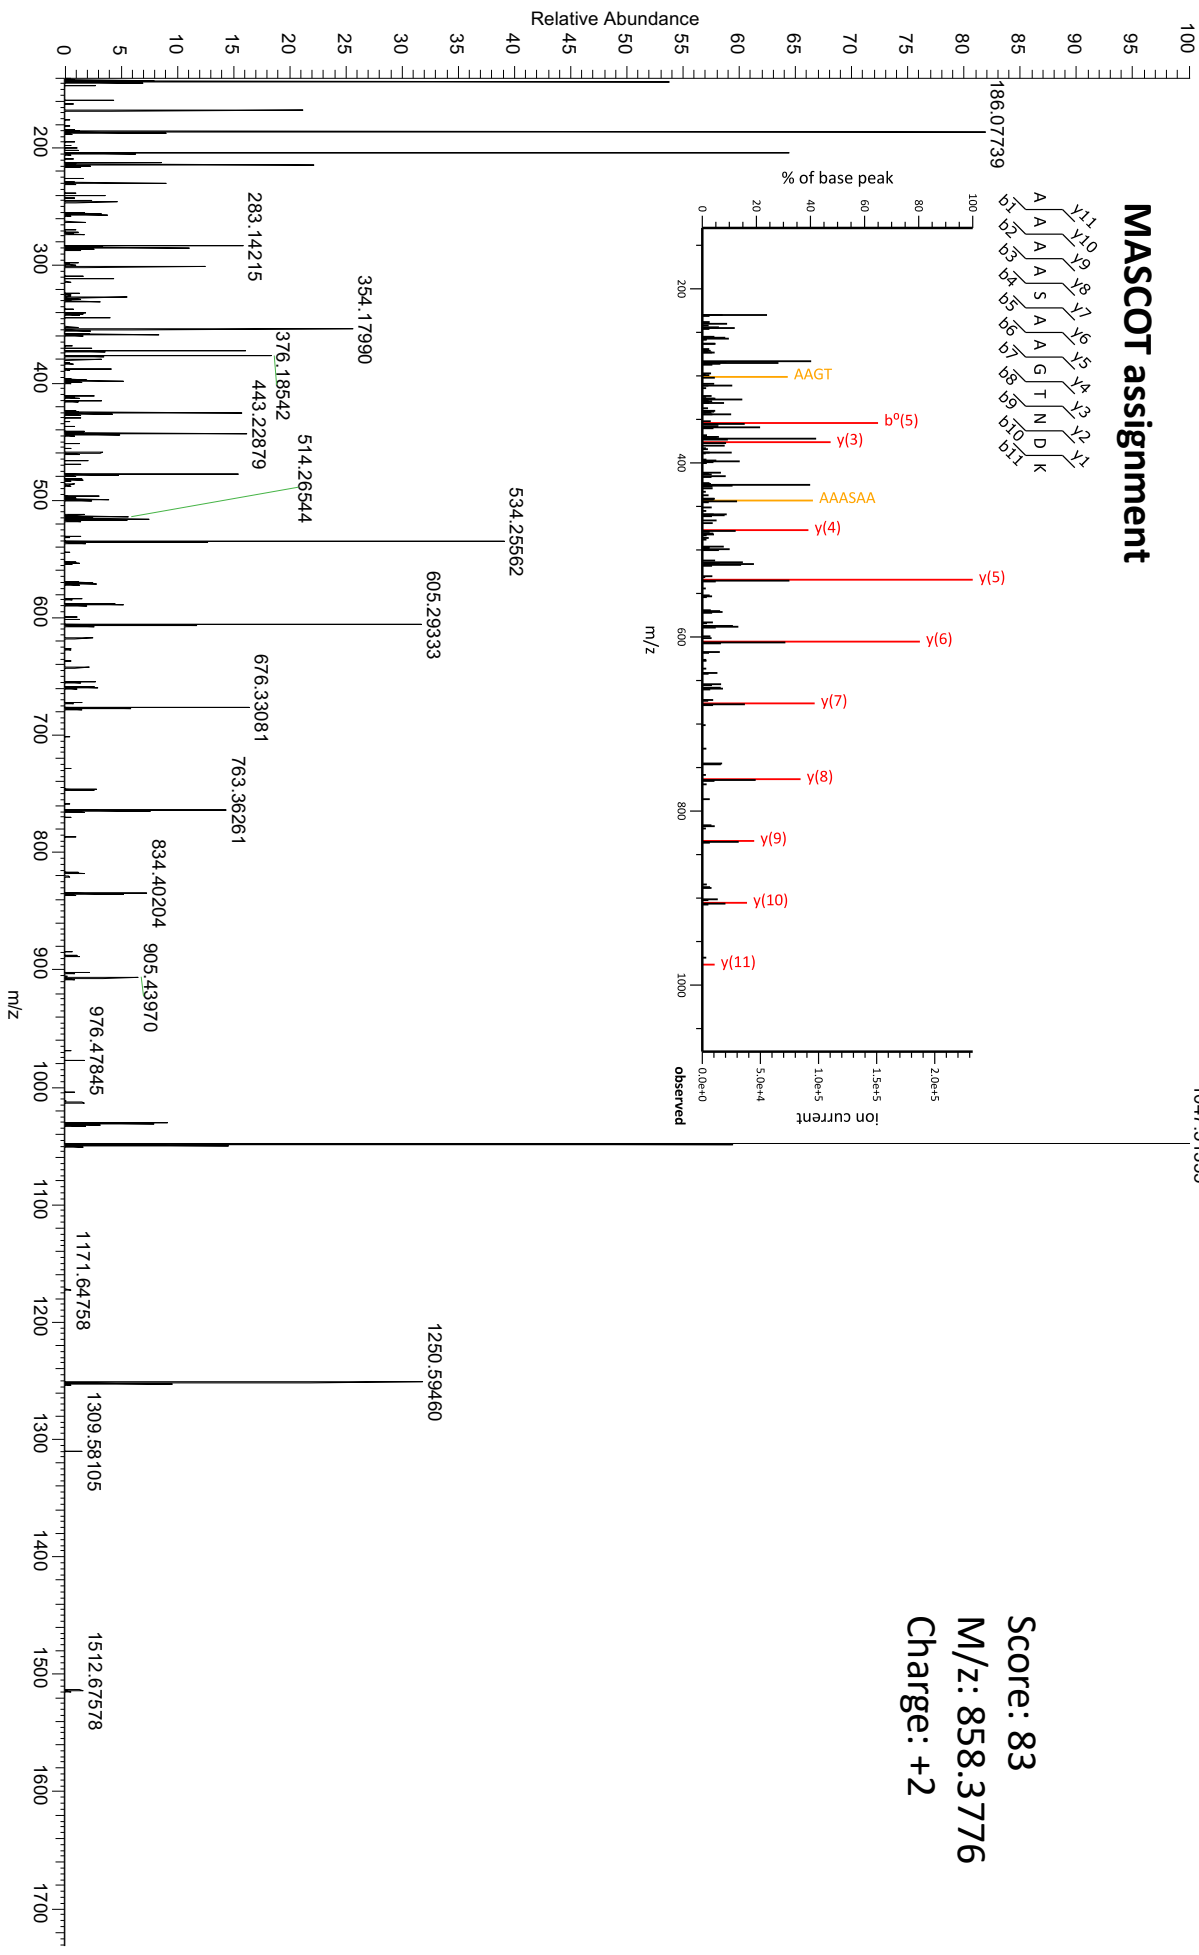

Score: 83

M/z: 858.3776

Charge: +2

ITMS-CID

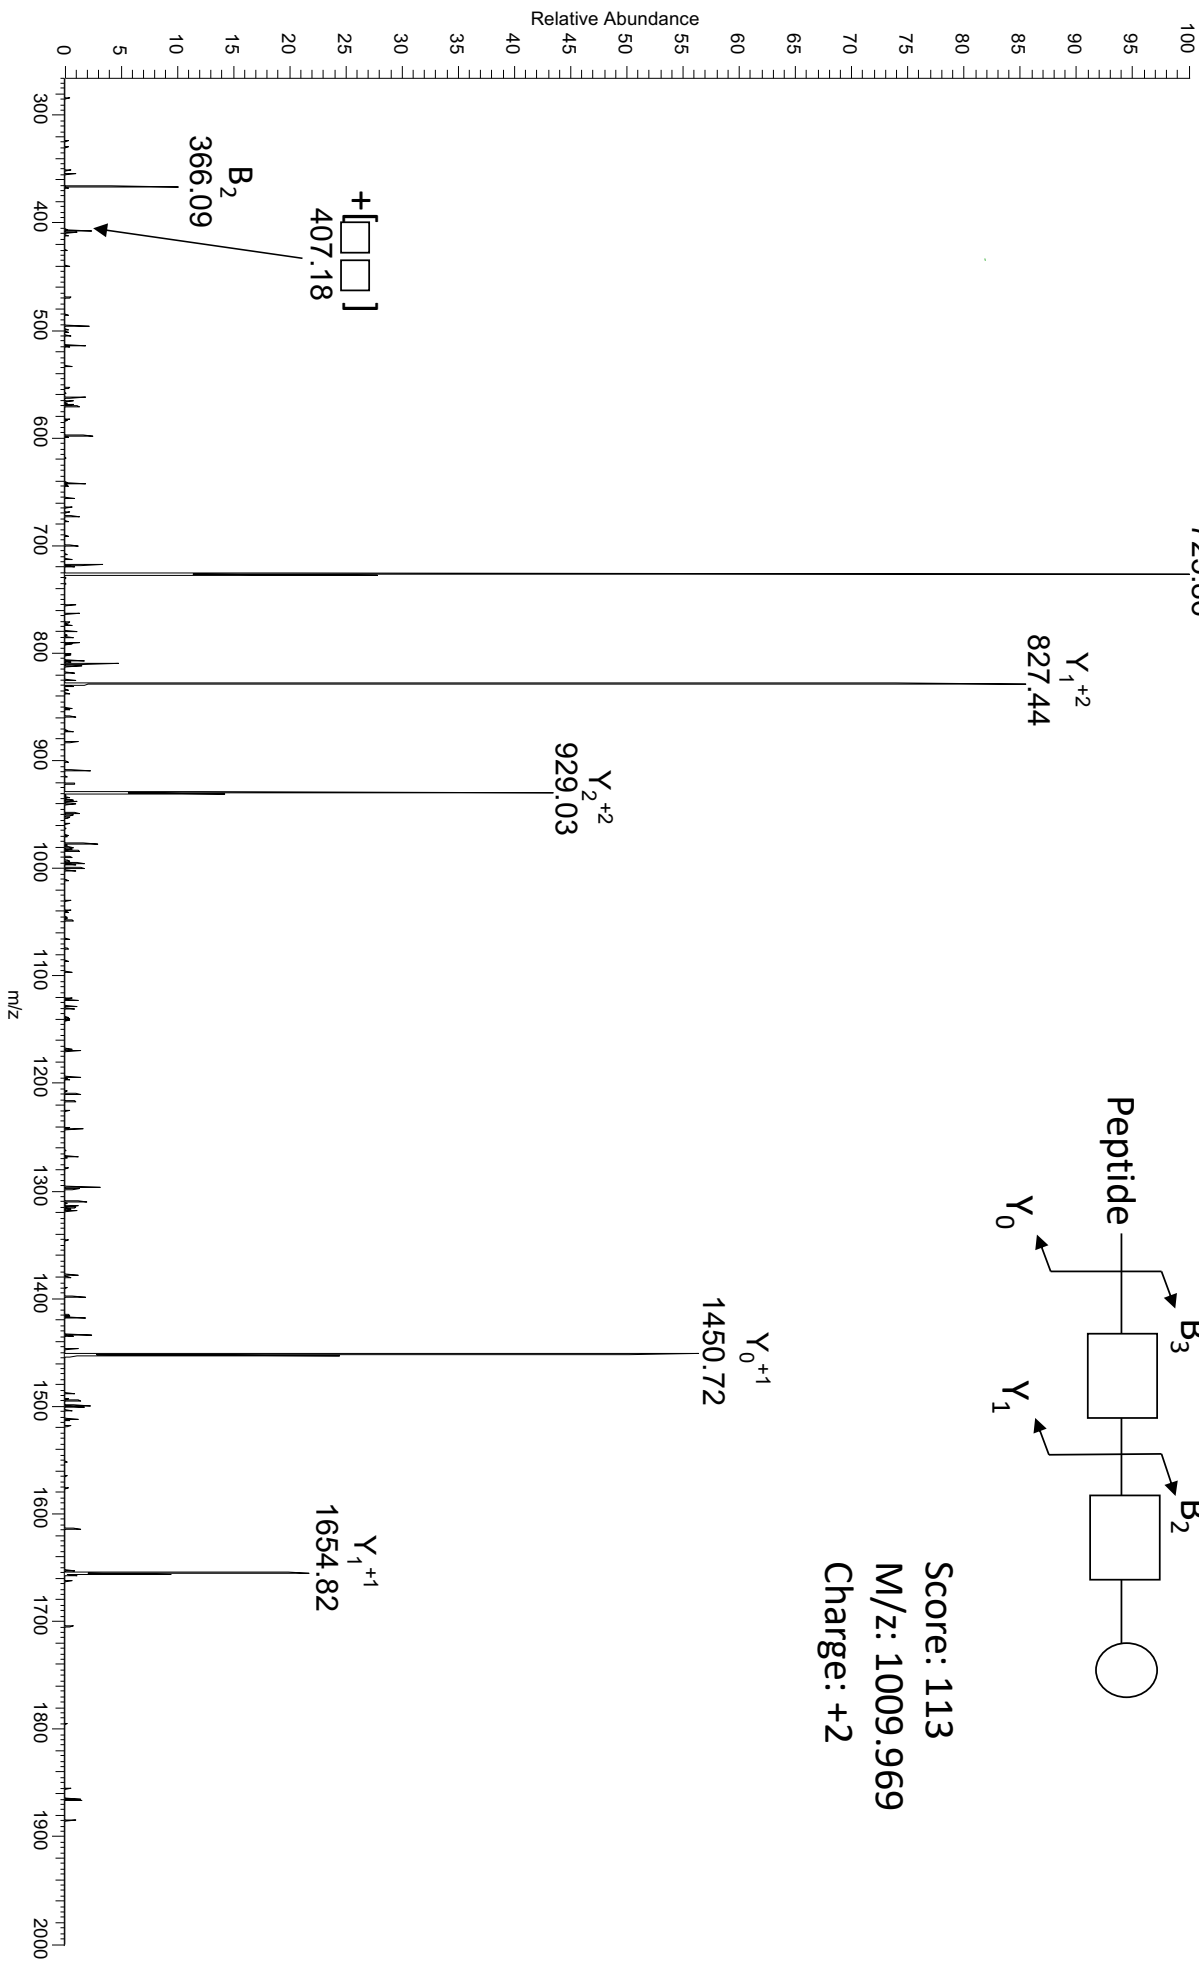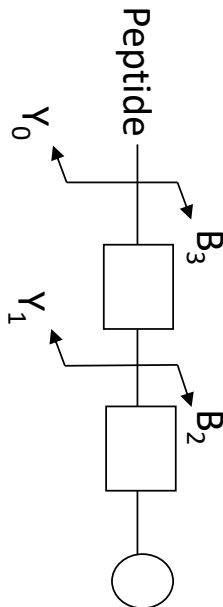

Score: 113  
M/z: 1009.969  
Charge: +2

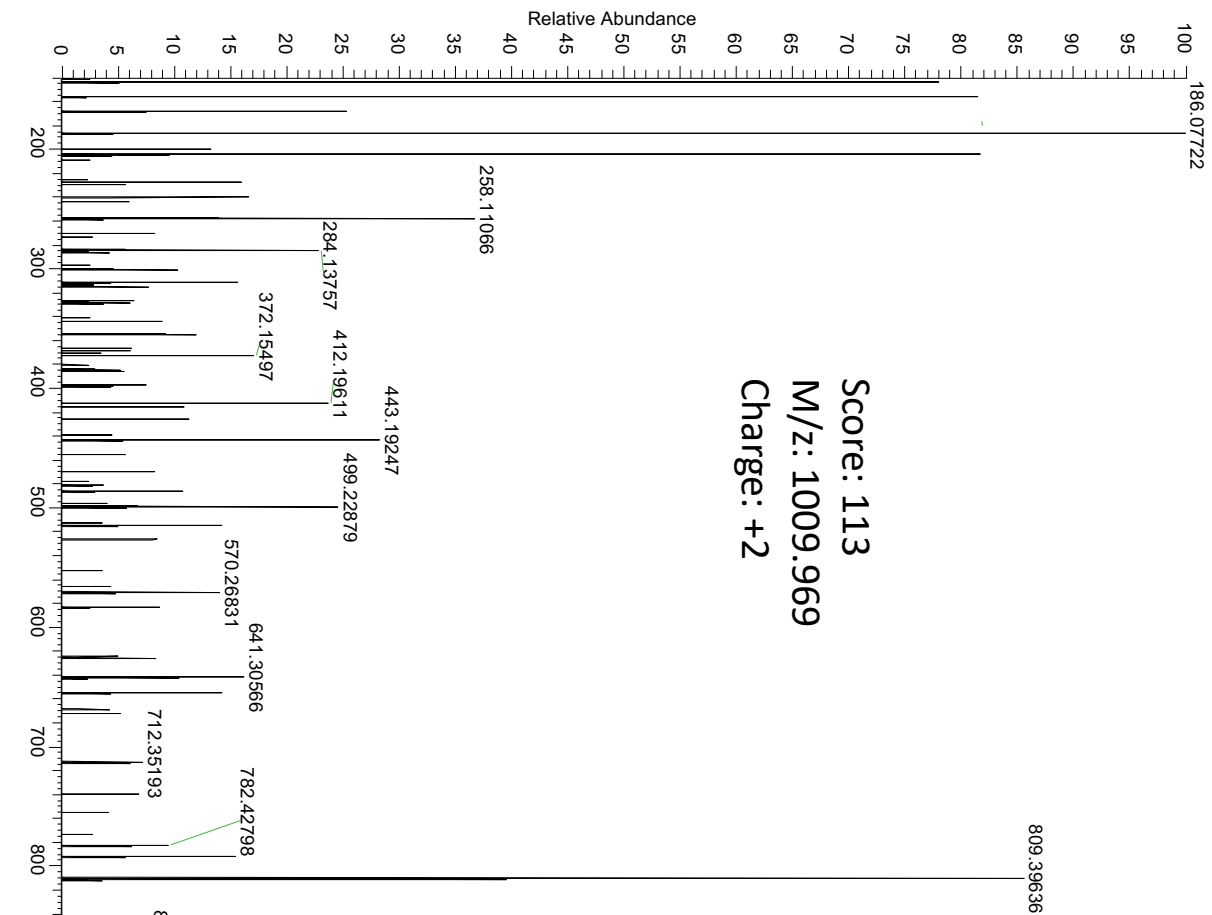

Score: 113  
M/z: 1009.969  
Charge: +2

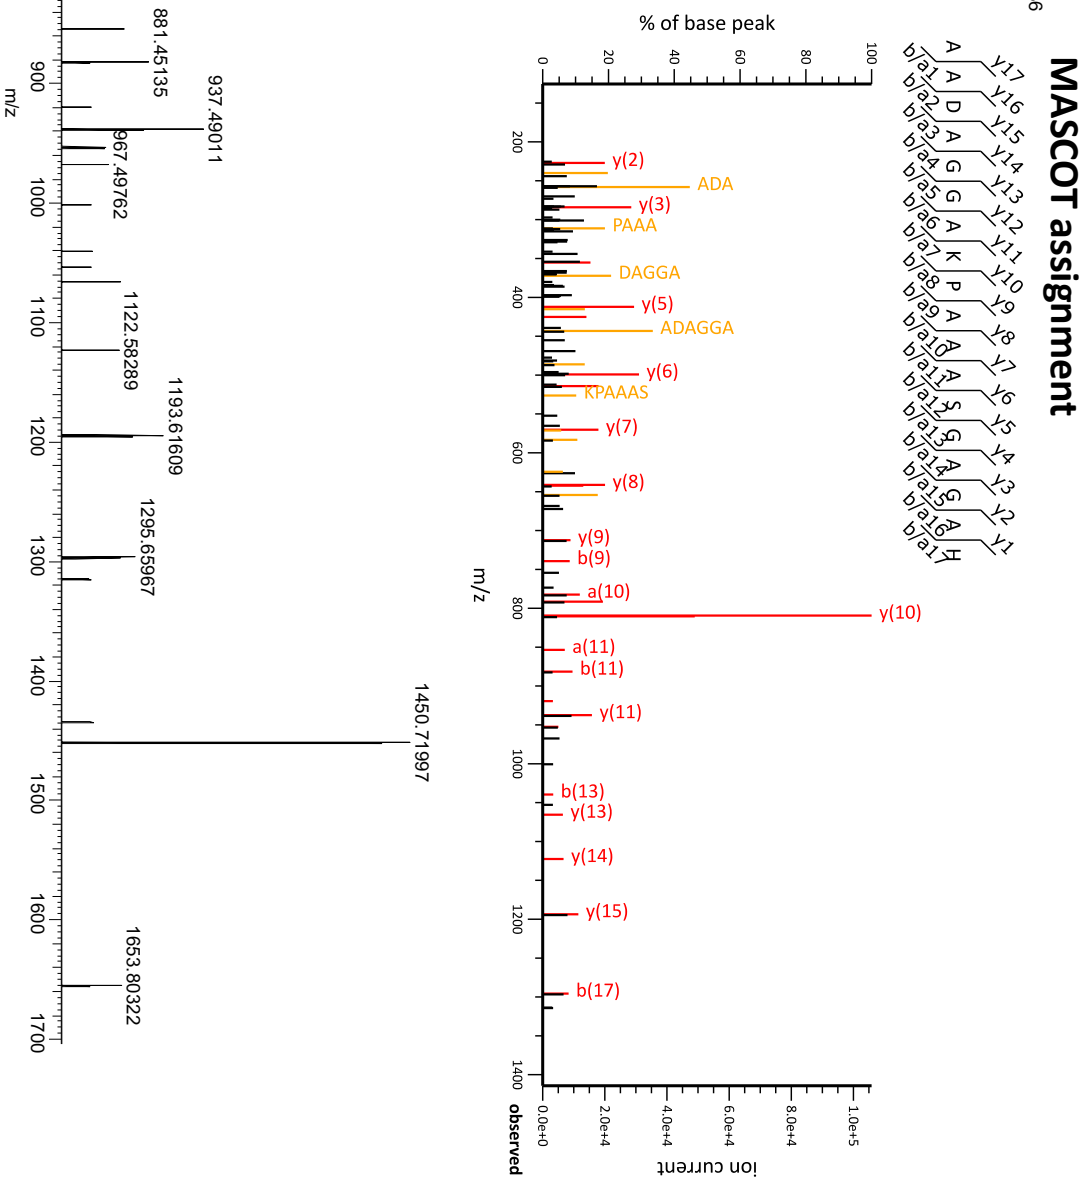

ITMS-CID

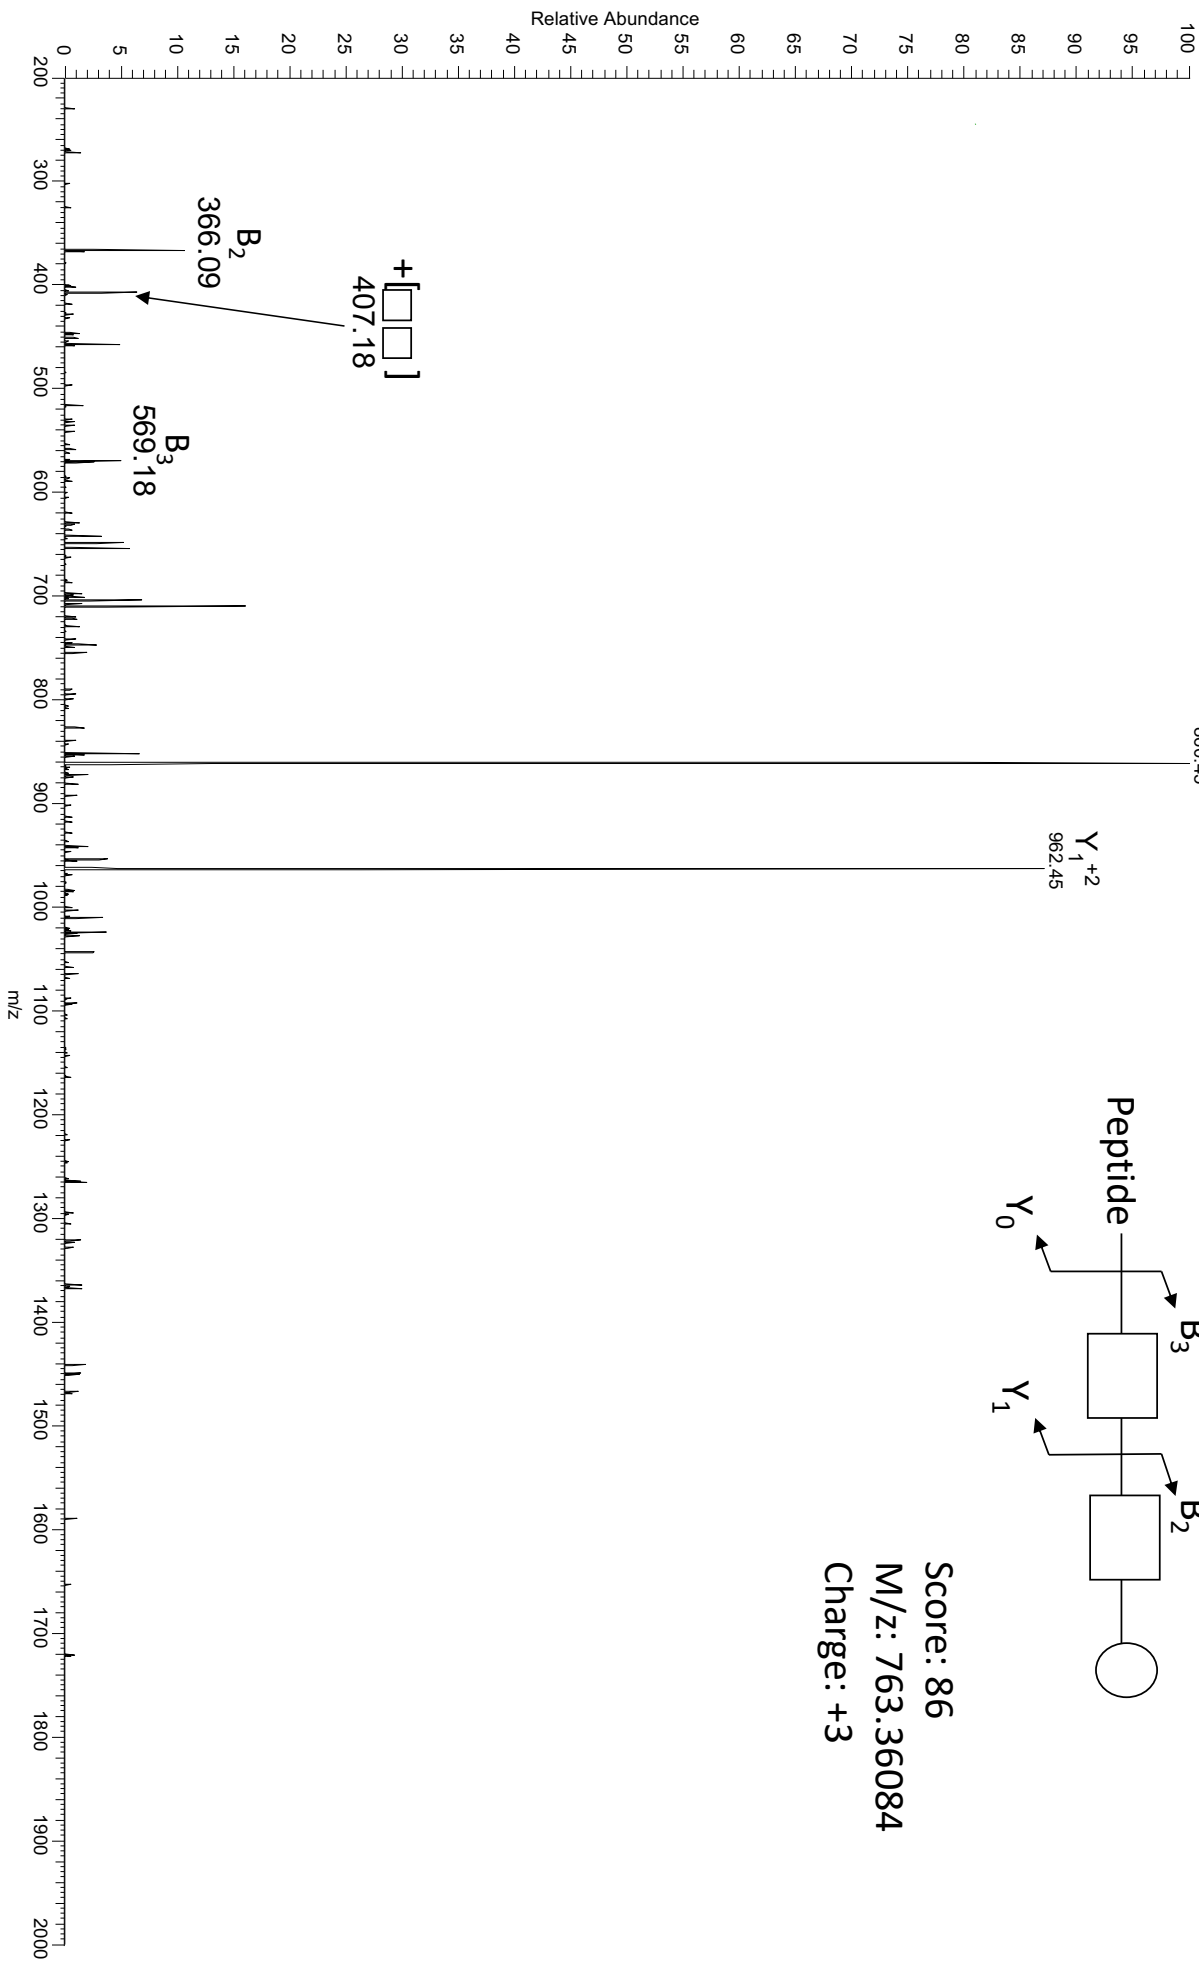

Score: 86  
M/z: 763.36084  
Charge: +3

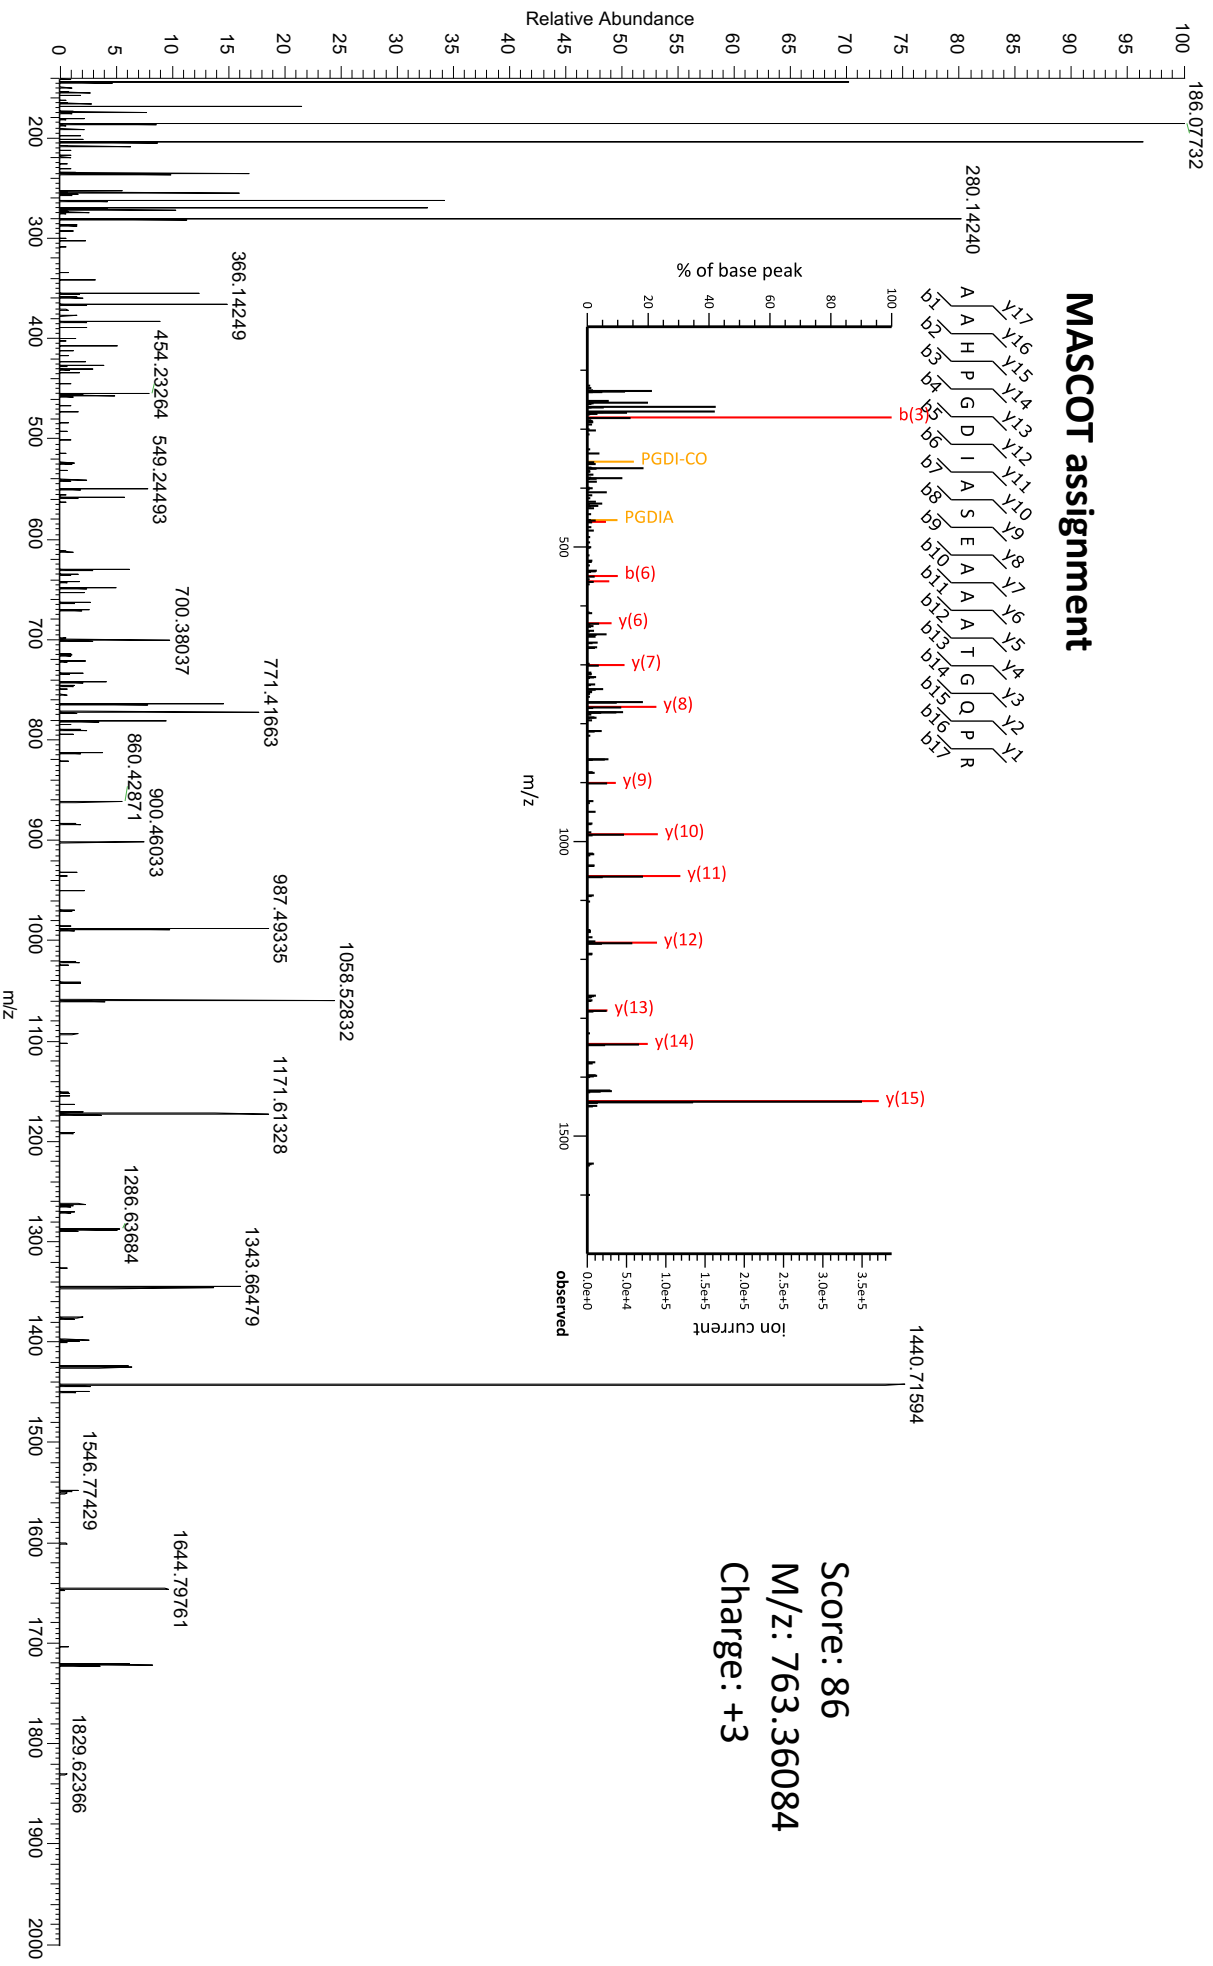

### MASCOT assignment

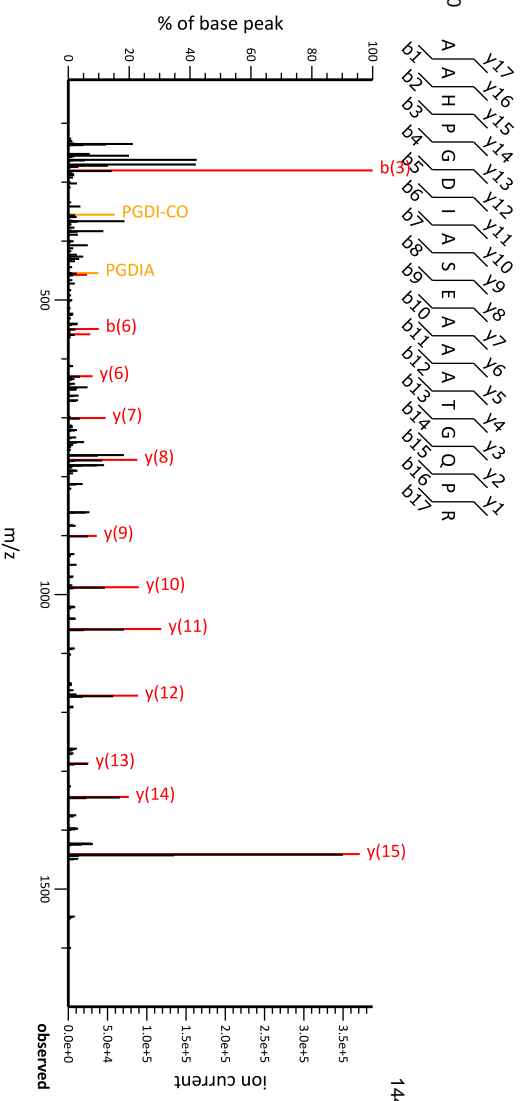

Score: 86  
M/z: 763.36084  
Charge: +3



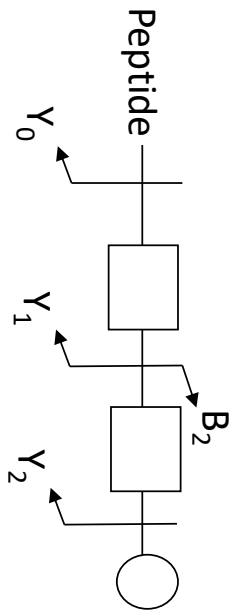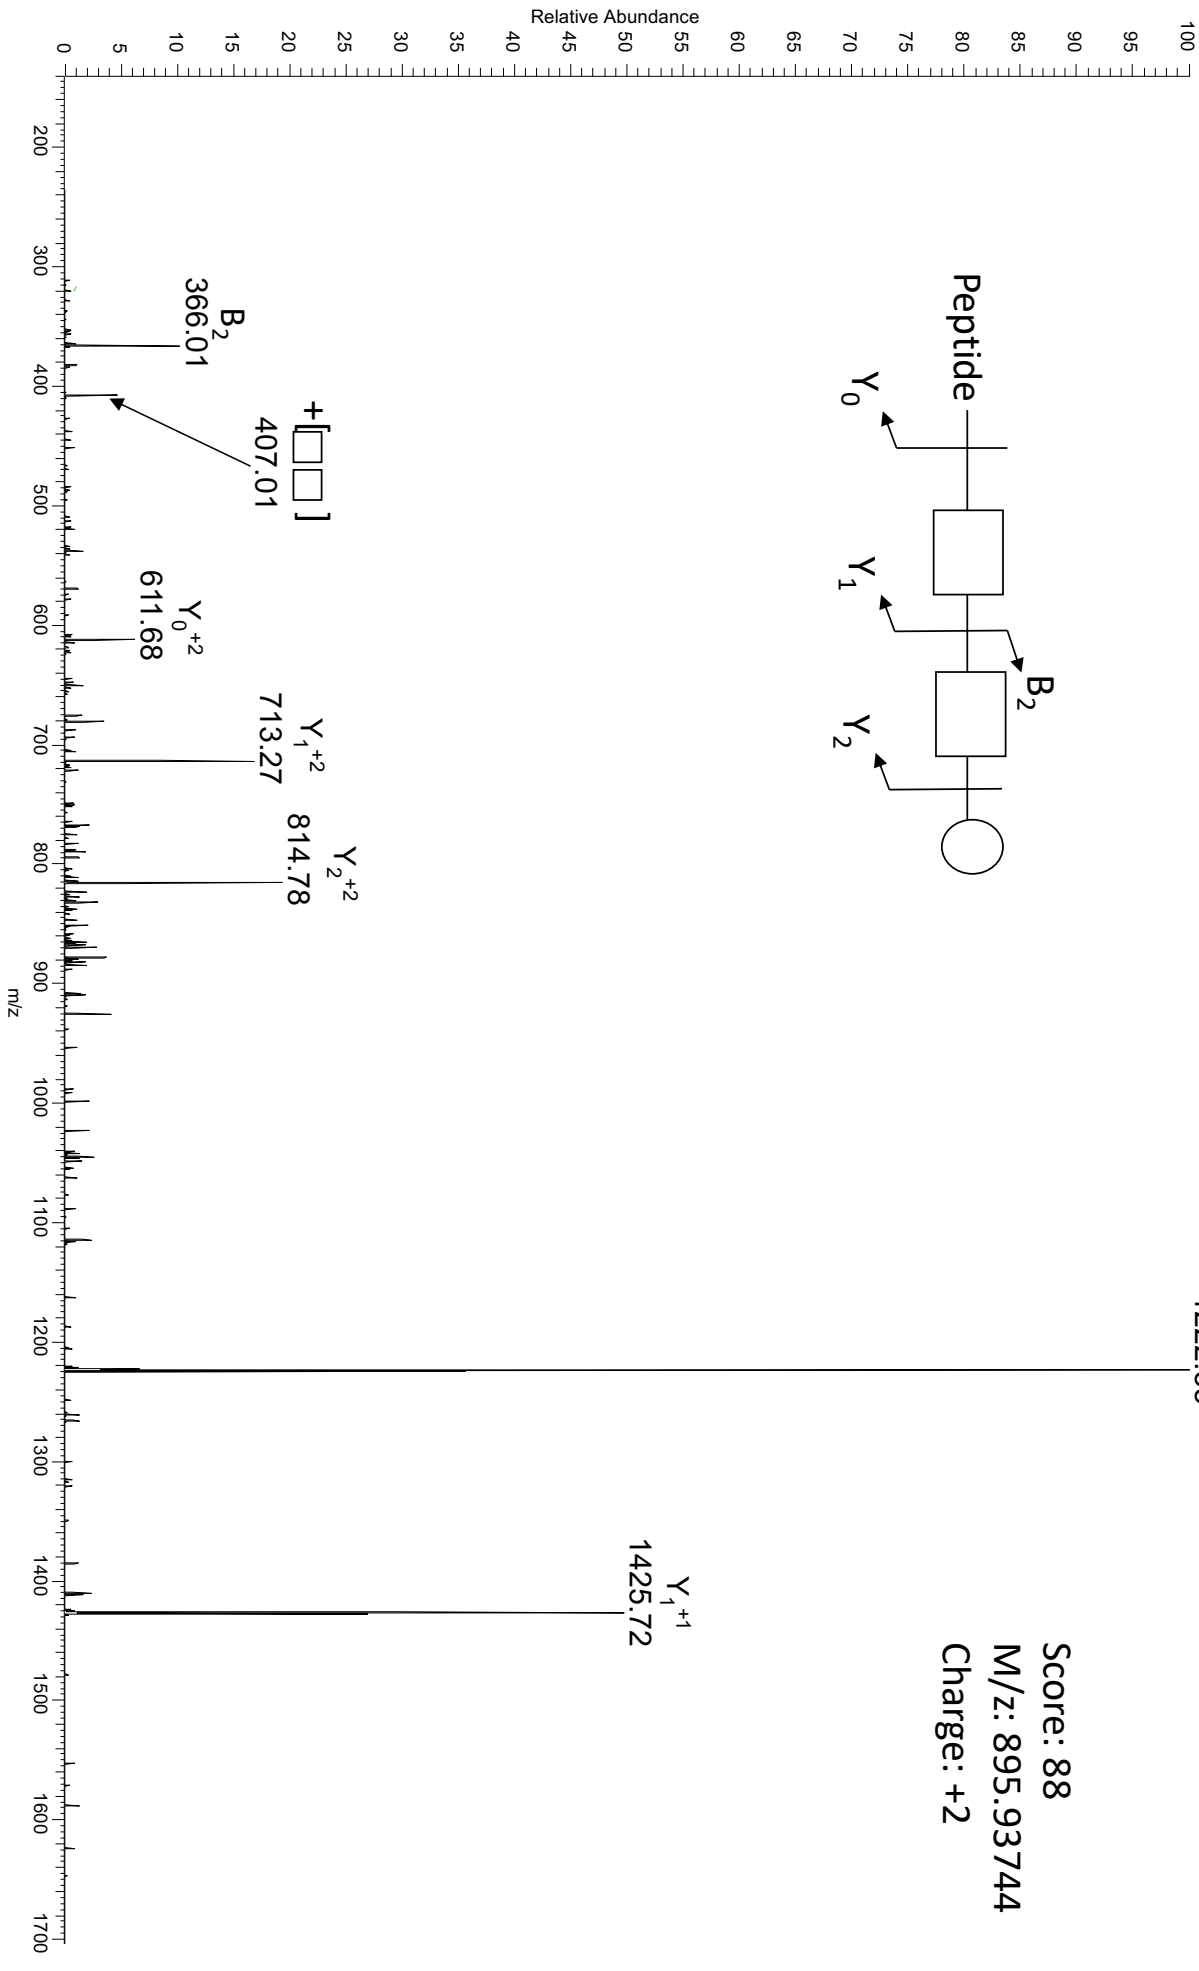

### MASCOT assignment

A P A A P E A A S A P T R E  
Y/W1 Y/W2 Y/W3 Y/W4 Y/W5 Y/W6 Y/W7 Y/W8  
Y/W1 Y/W2 Y/W3 Y/W4 Y/W5 Y/W6 Y/W7 Y/W8

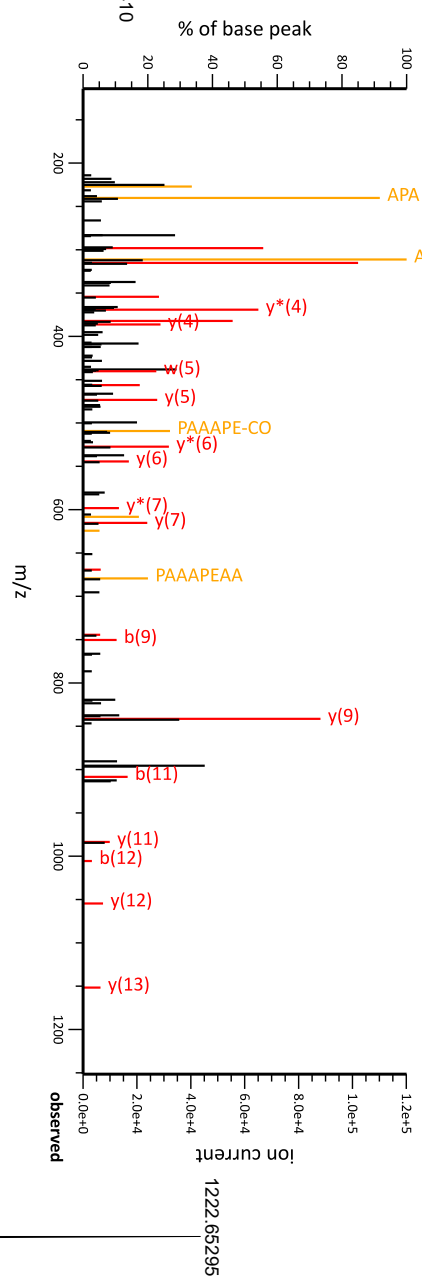

Score: 88  
M/z: 895.93744  
Charge: +2

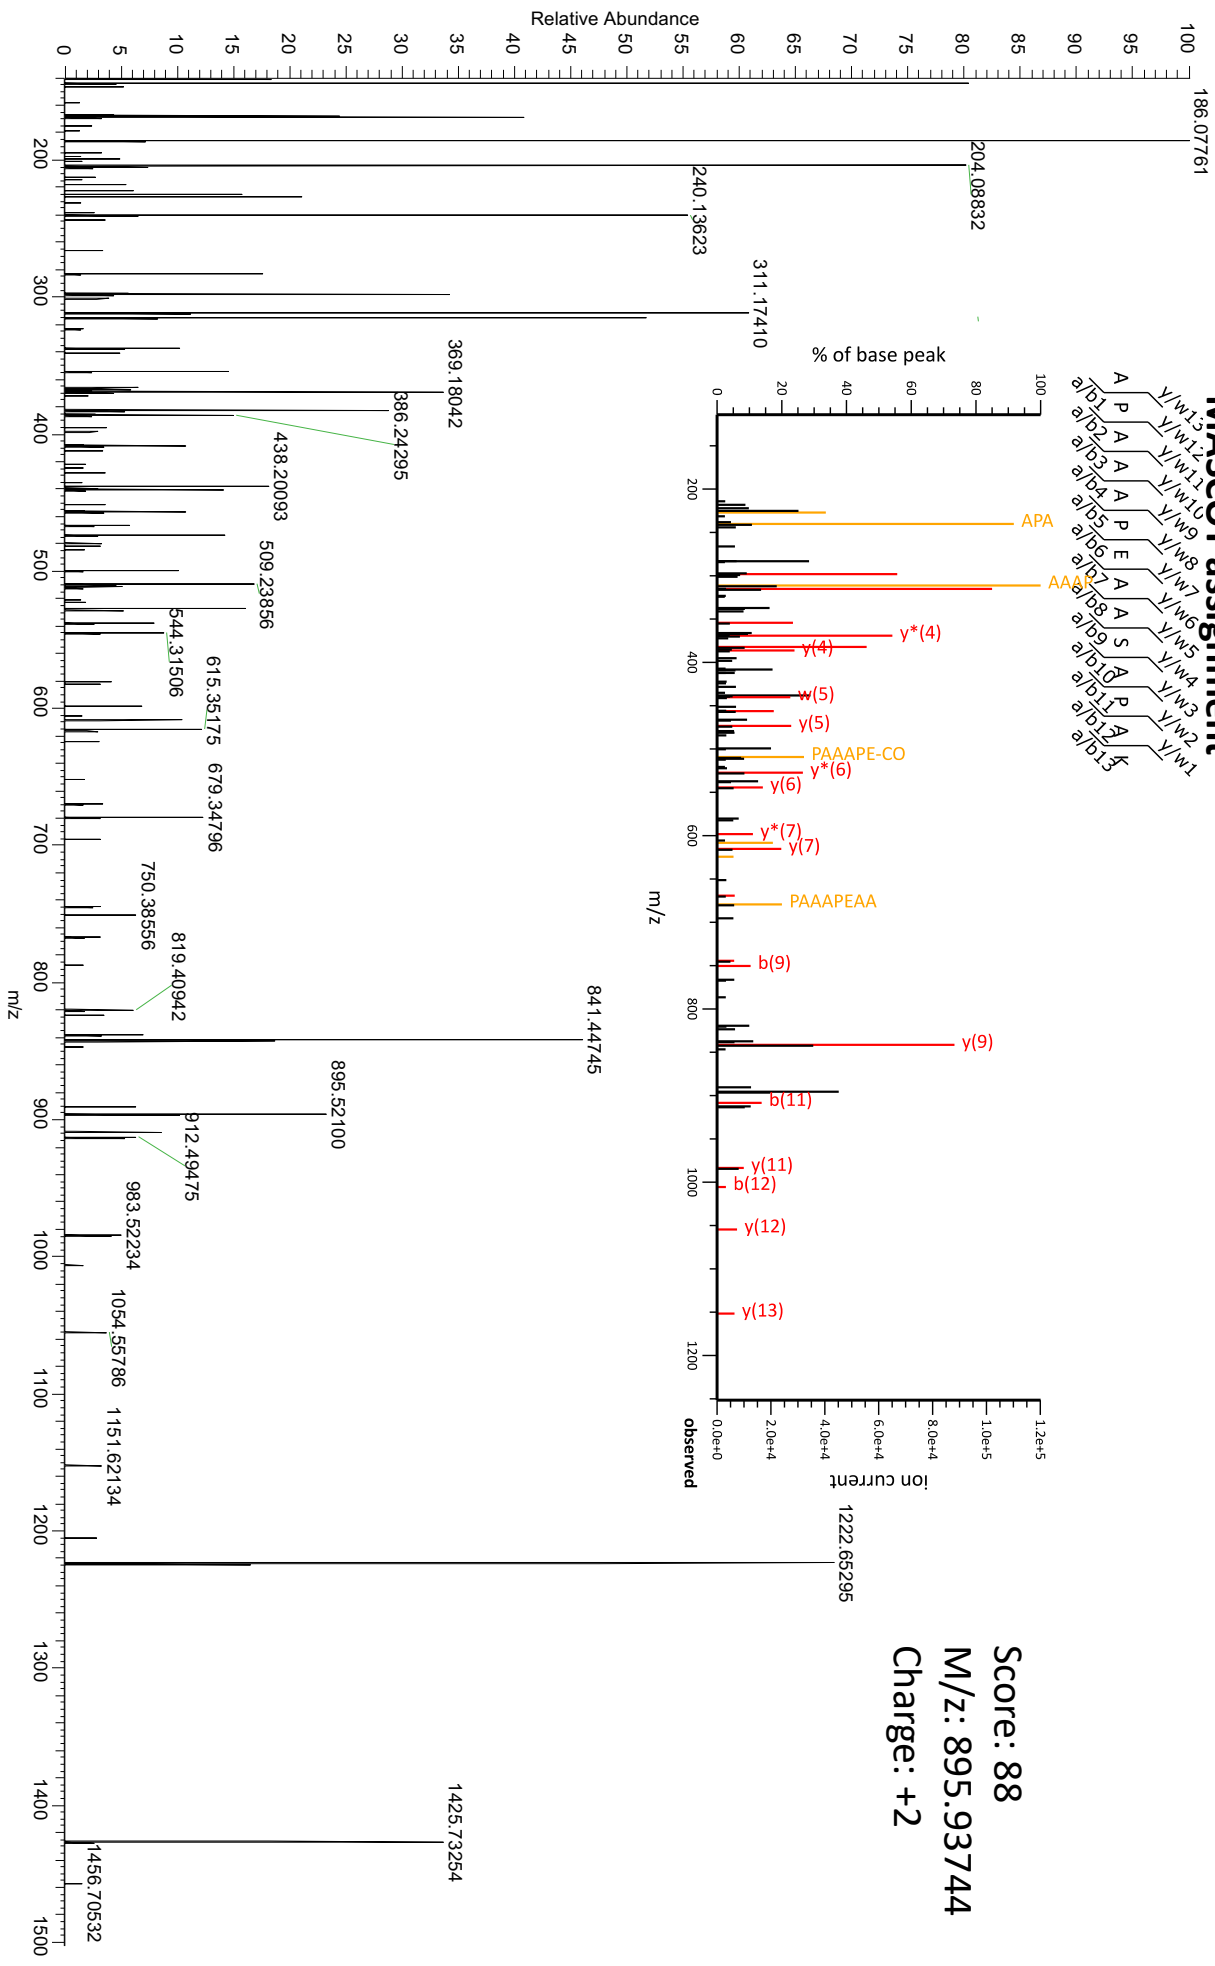

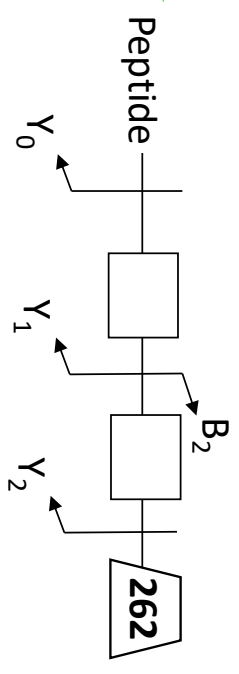

Score: 80  
M/z: 945.94543  
Charge: +2

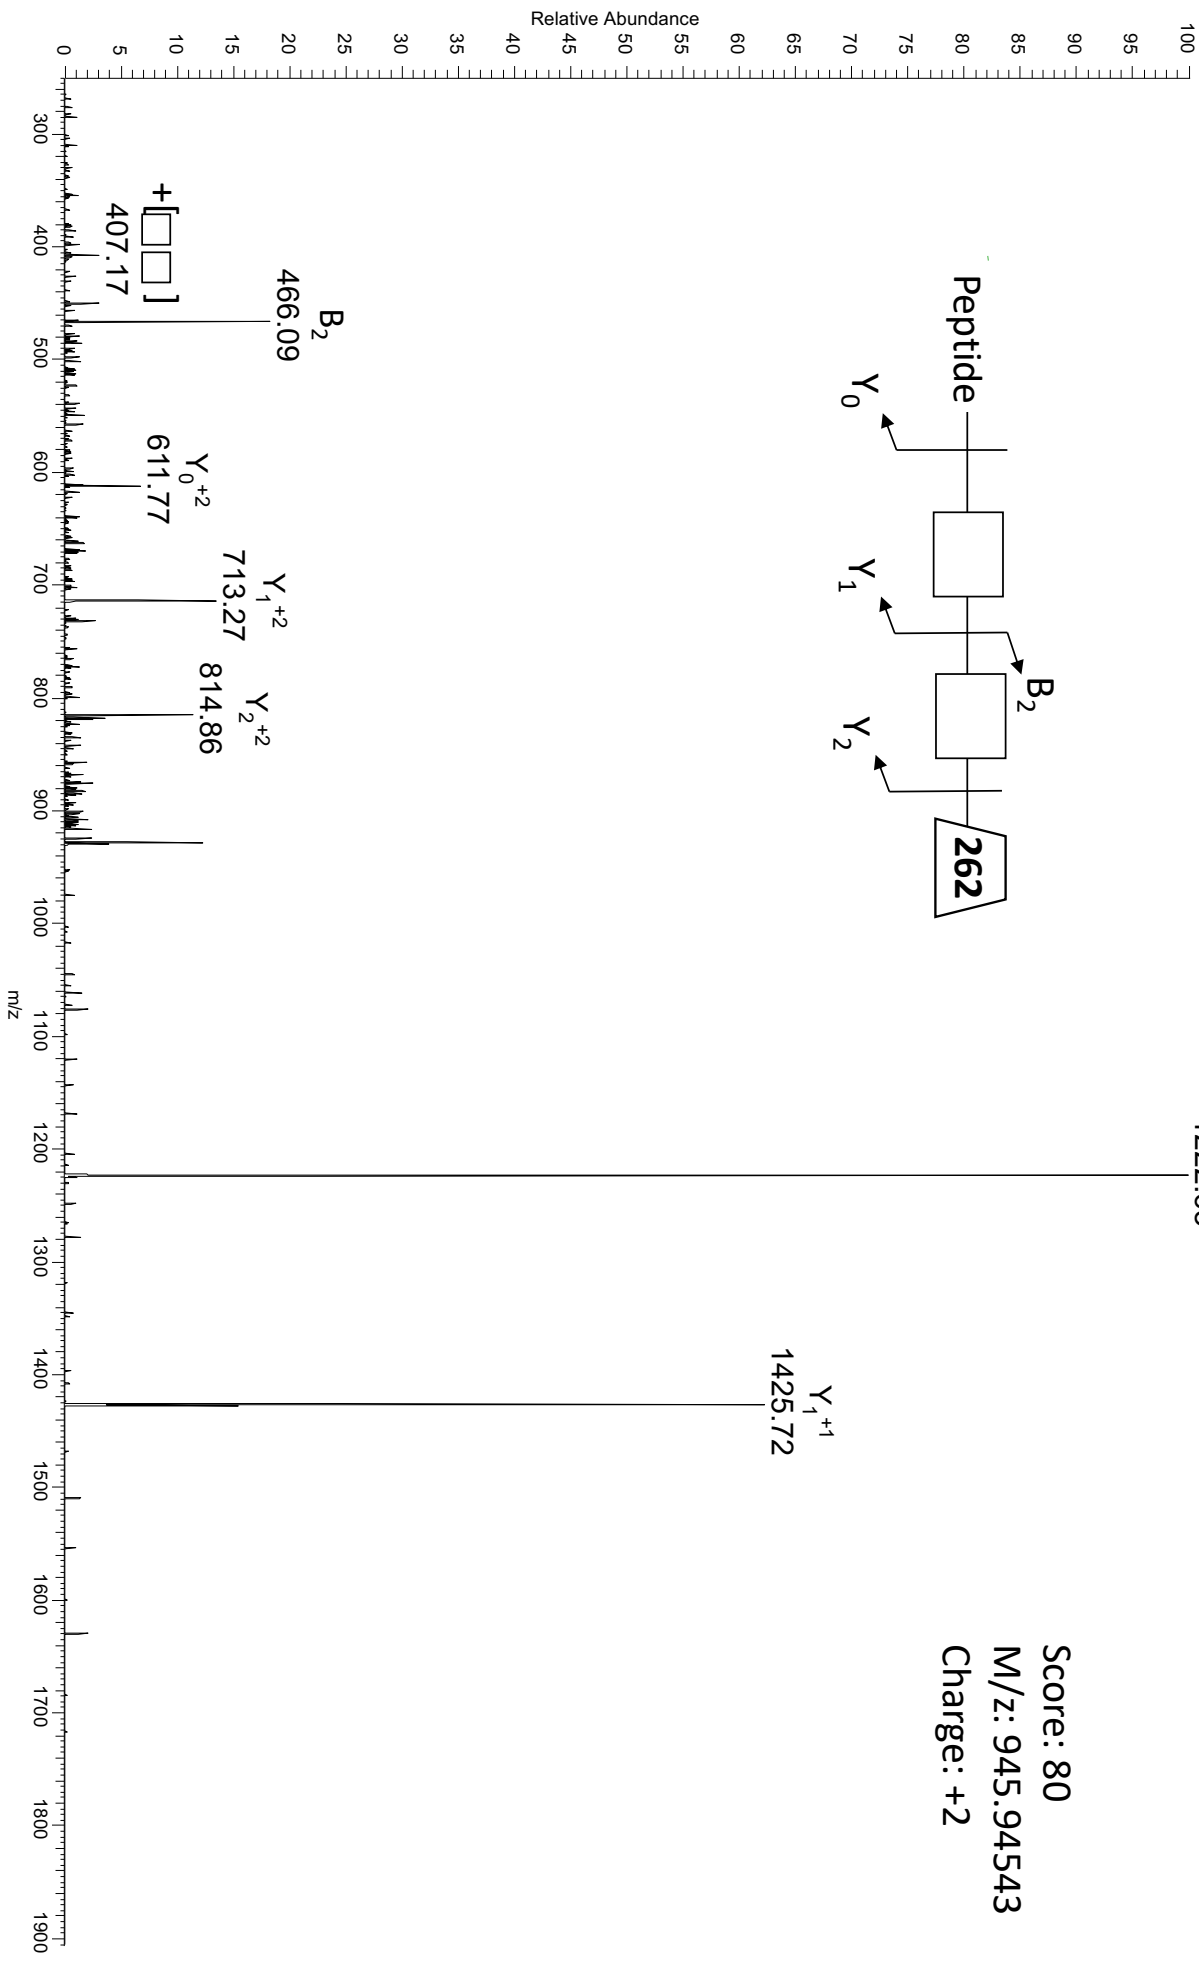

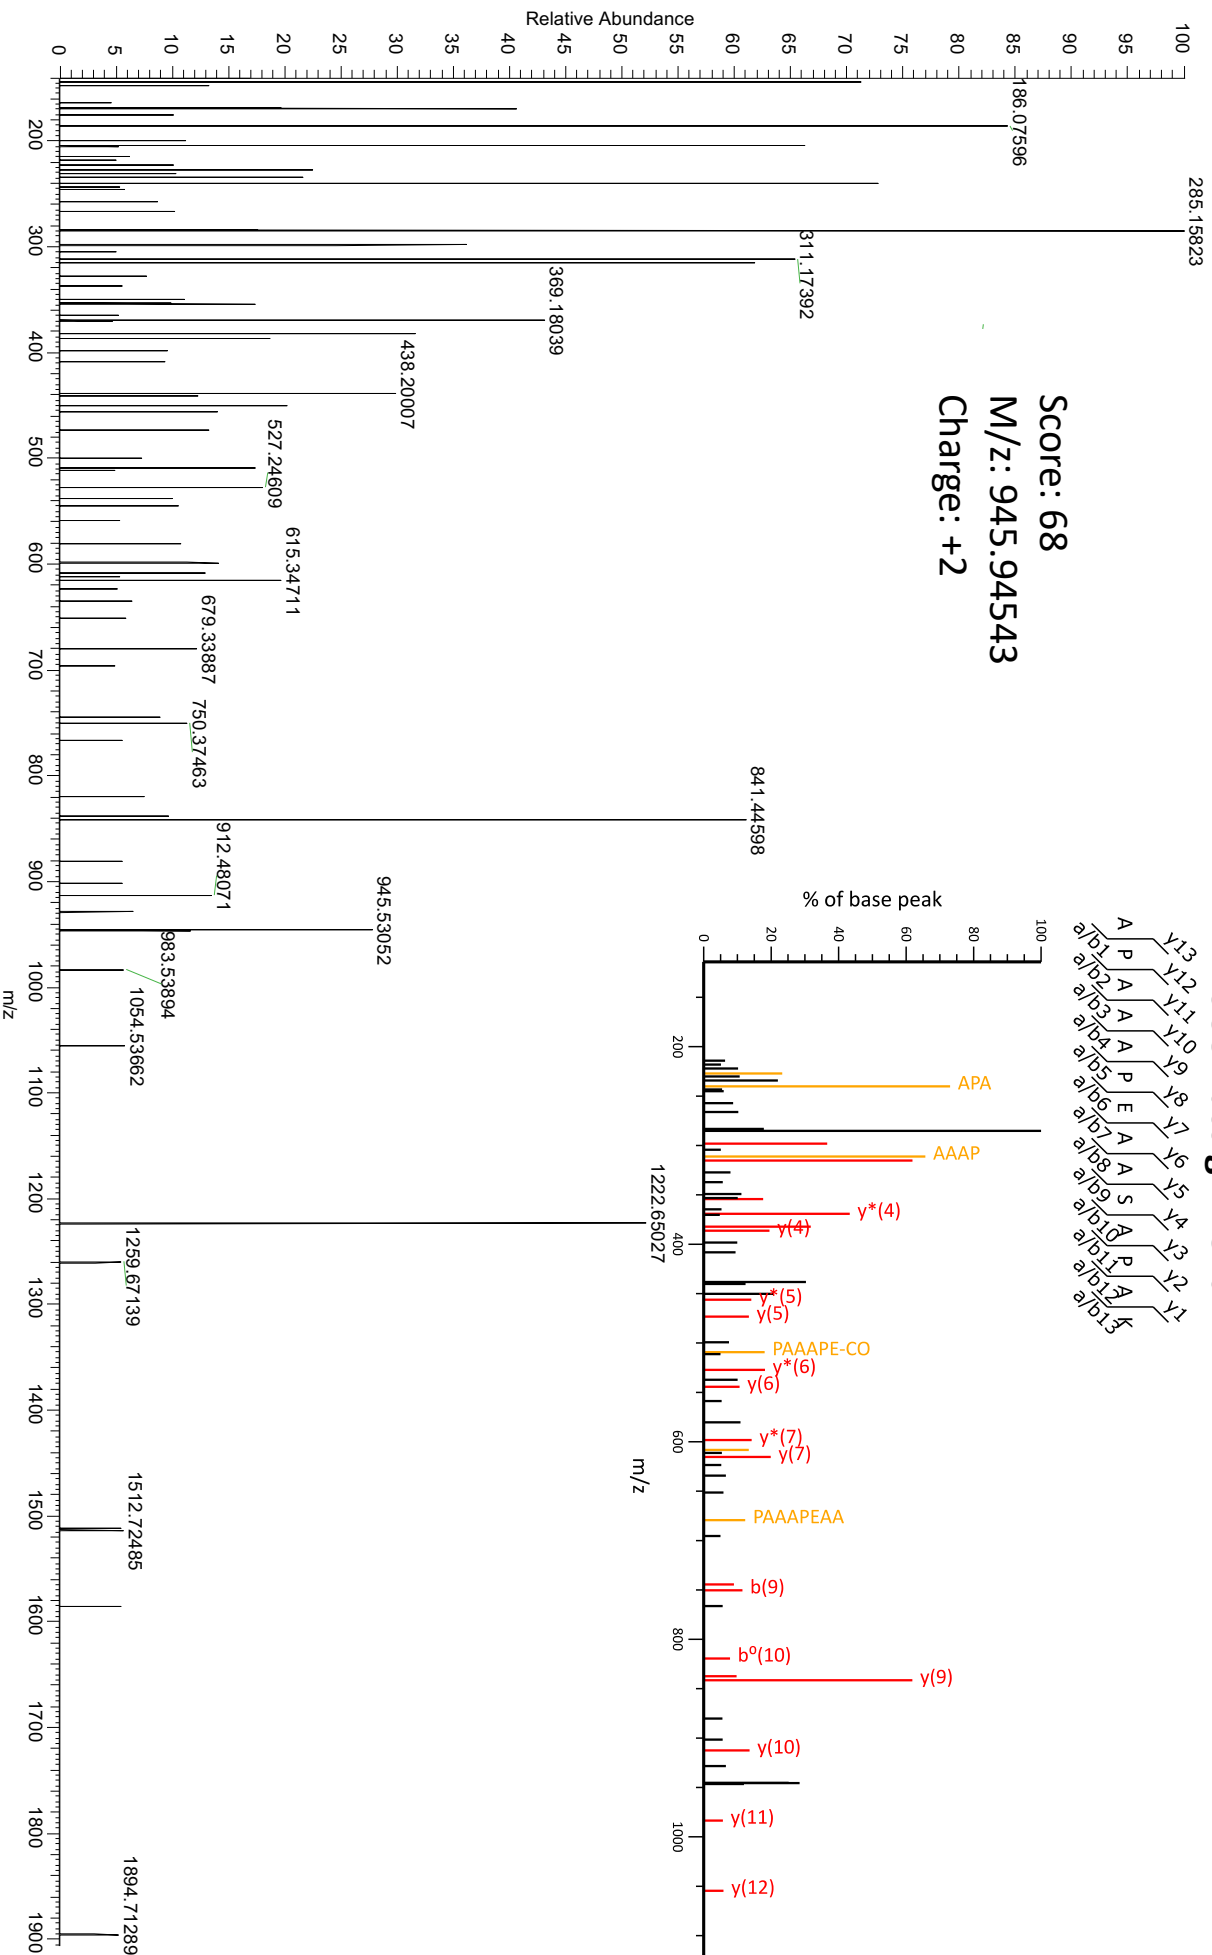

### MASCOT assignment

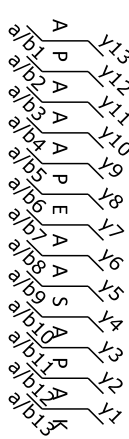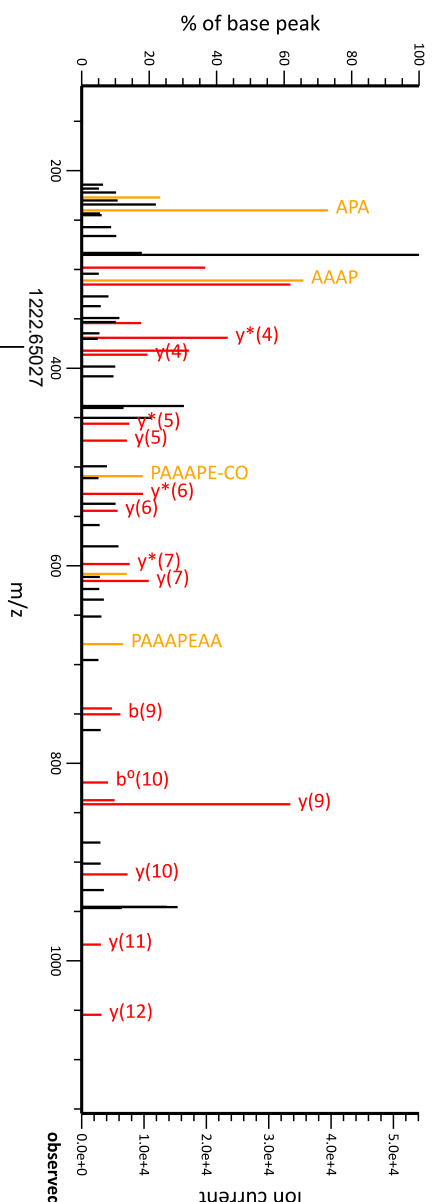

Peptide modified with two glycans

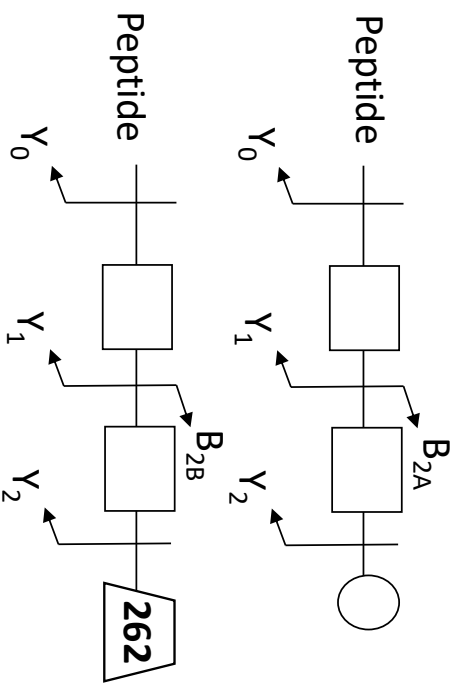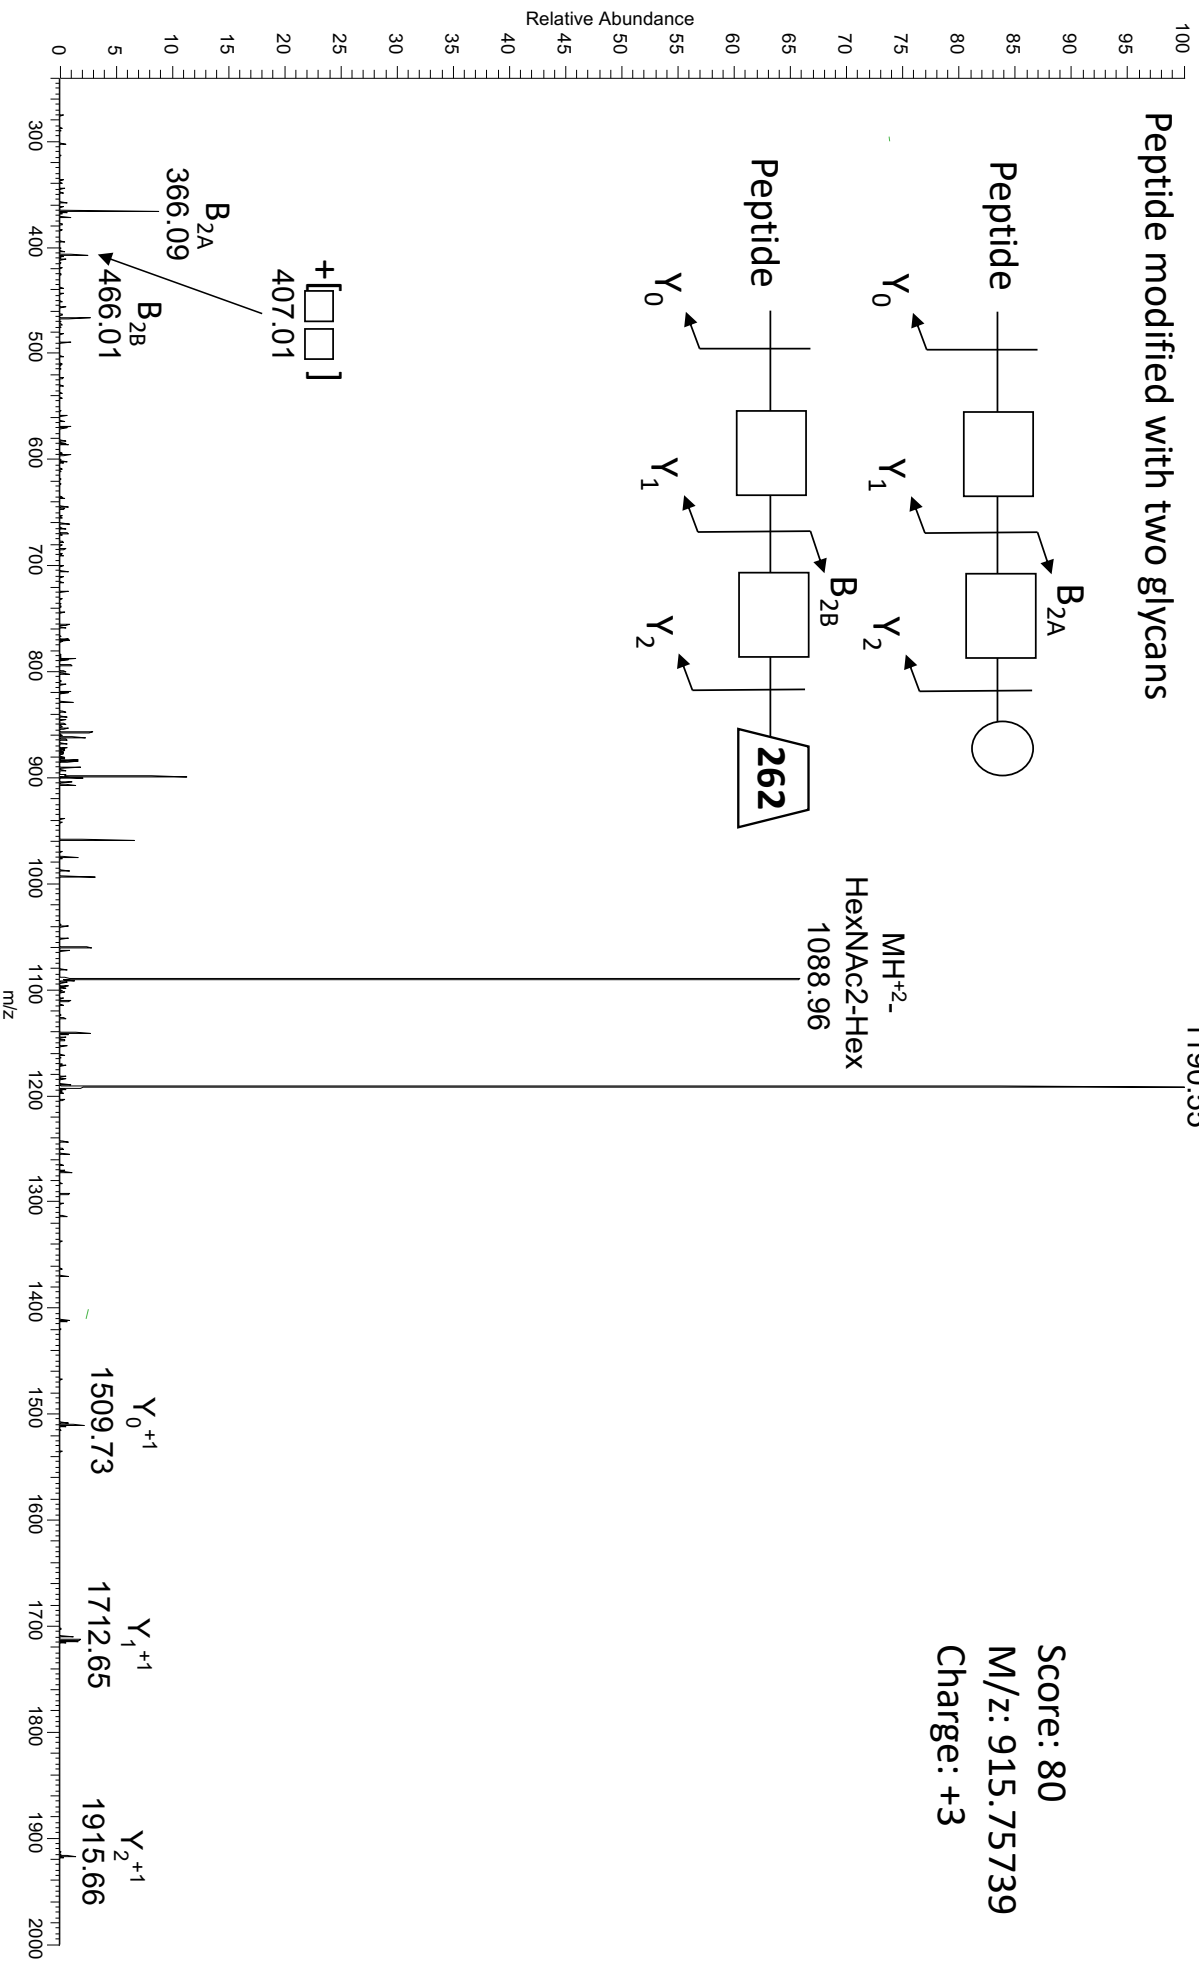

Score: 80

M/z: 915.75739

Charge: +3

186.07759

### MASCOT assignment

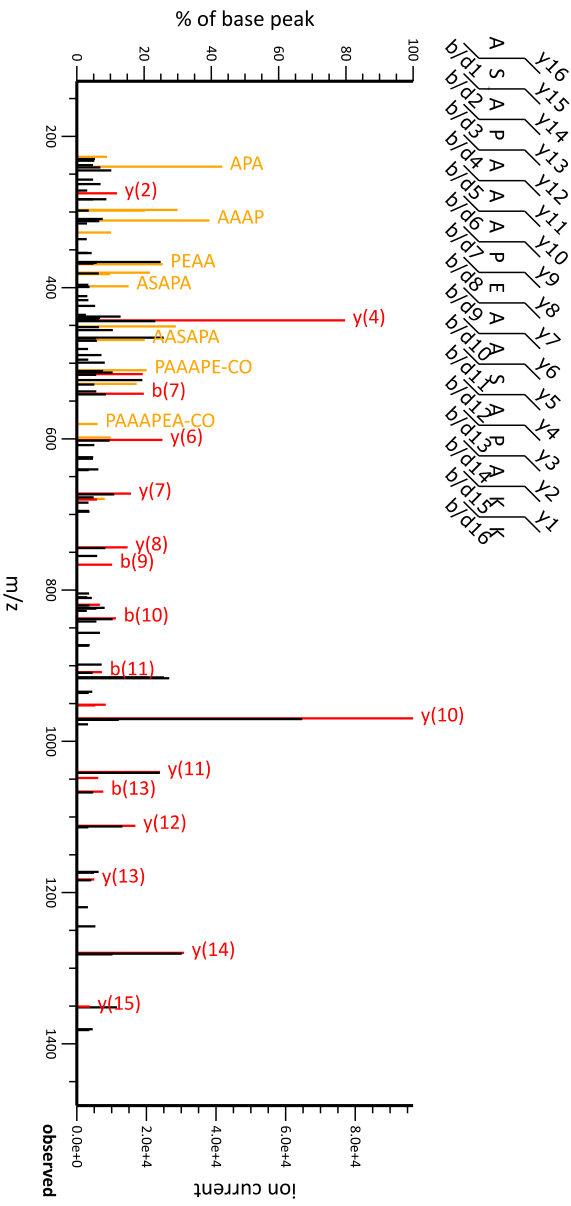

Score: 68

M/z: 915.75739

Charge: +3

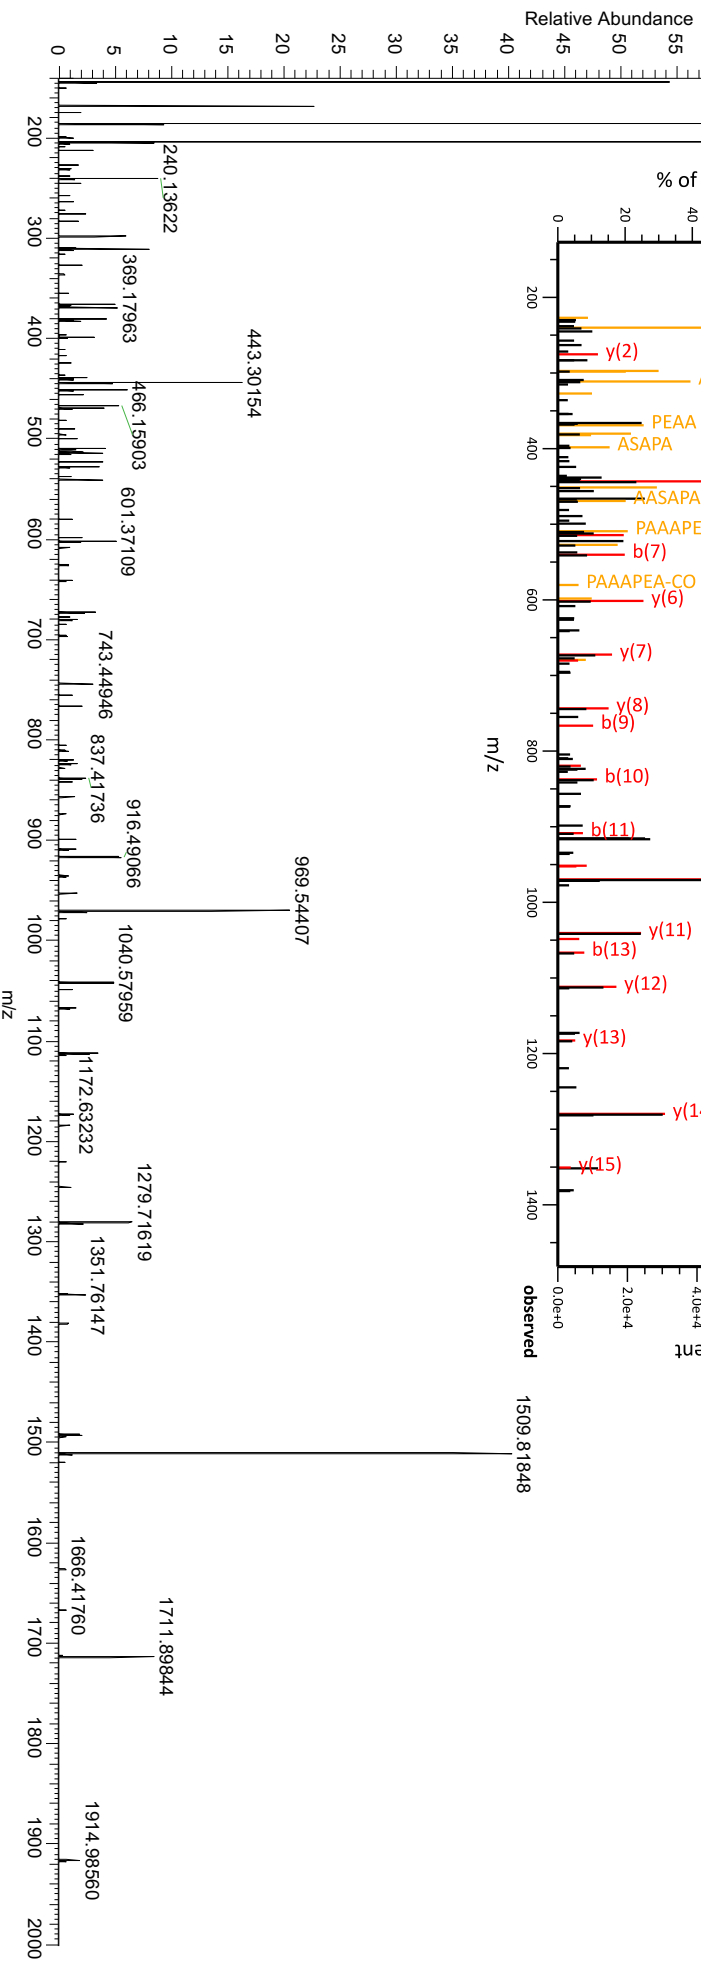

ITMS-CID

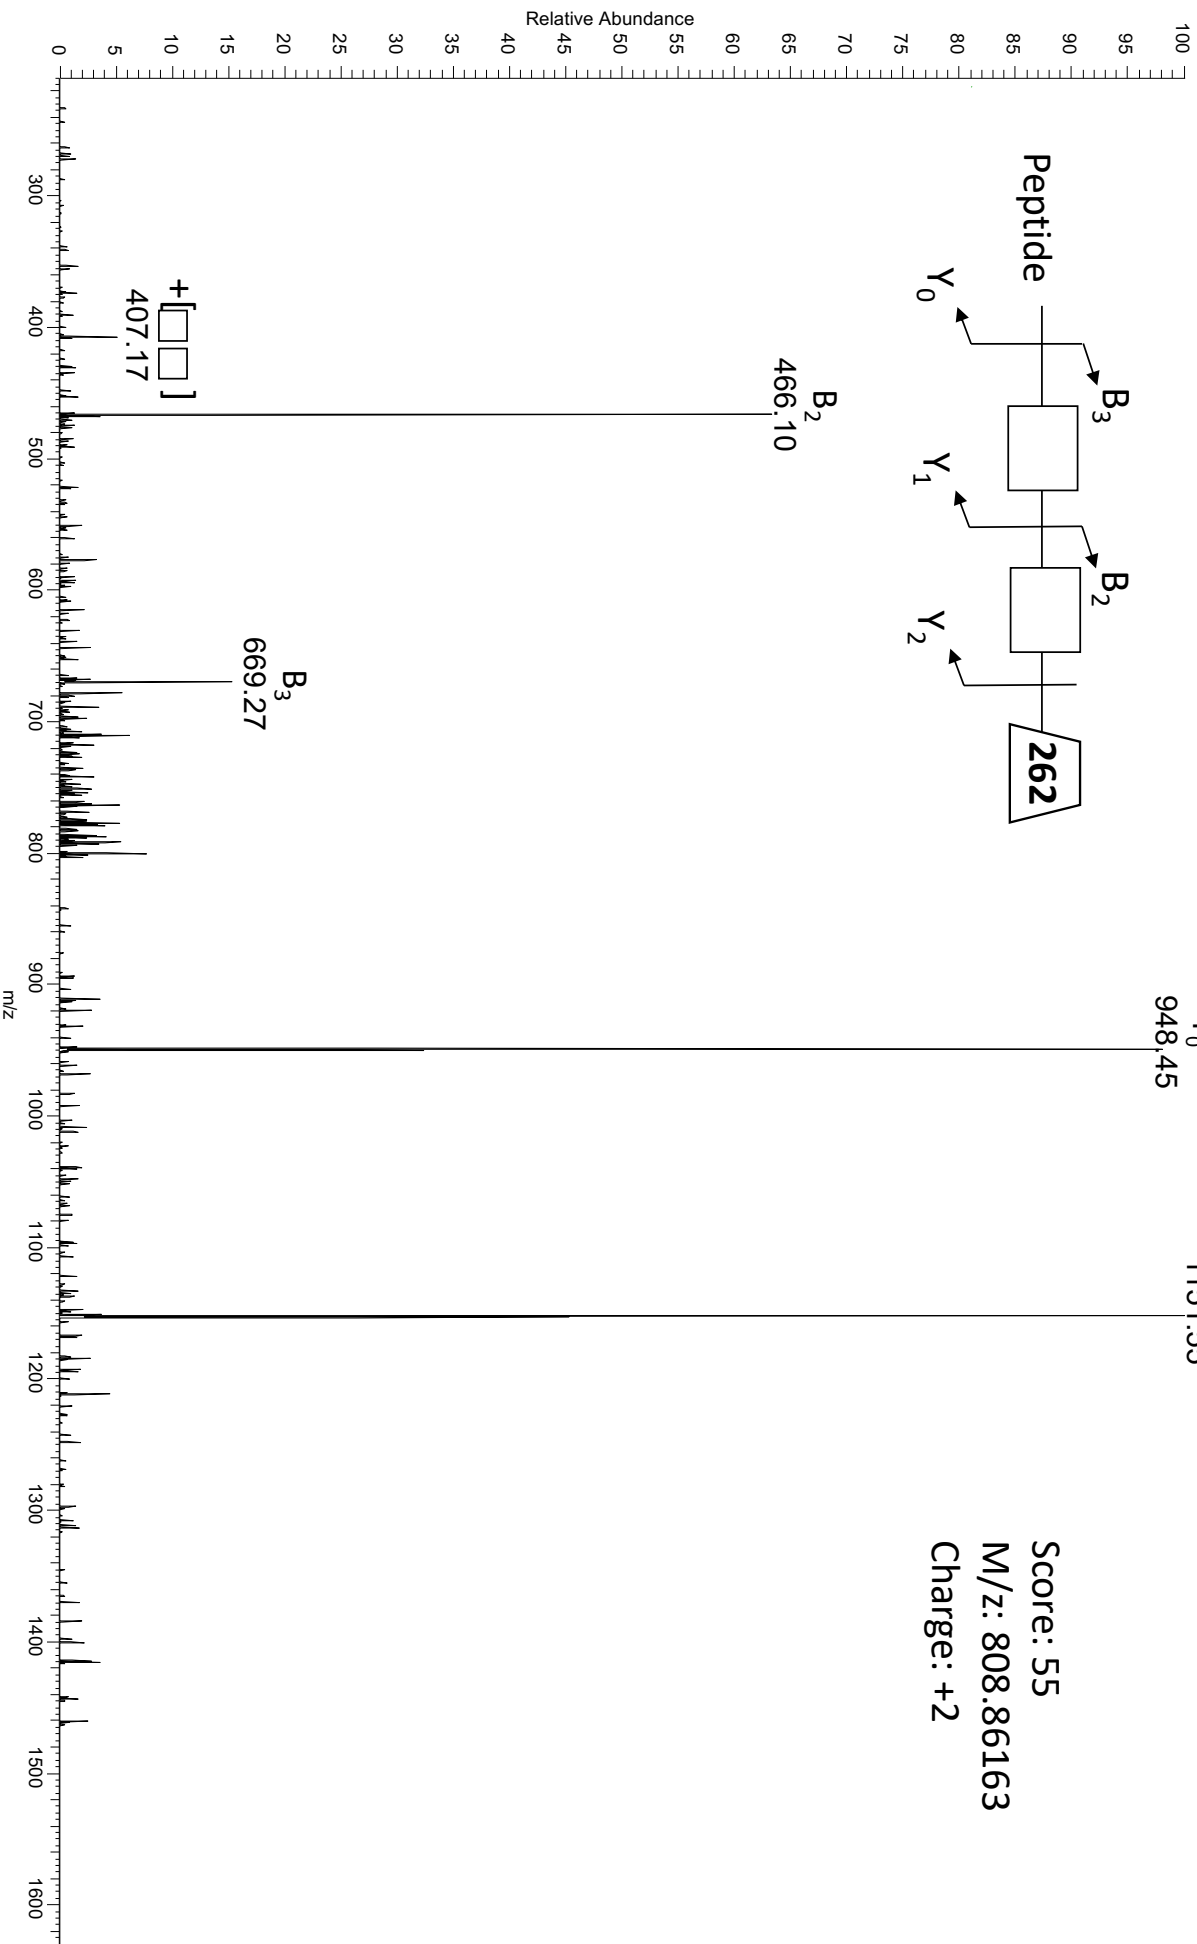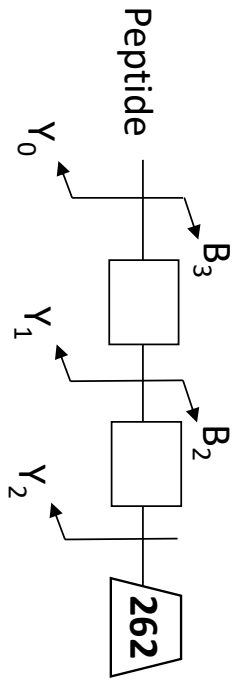

Score: 55  
M/z: 808.86163  
Charge: +2

MASCOT assignment

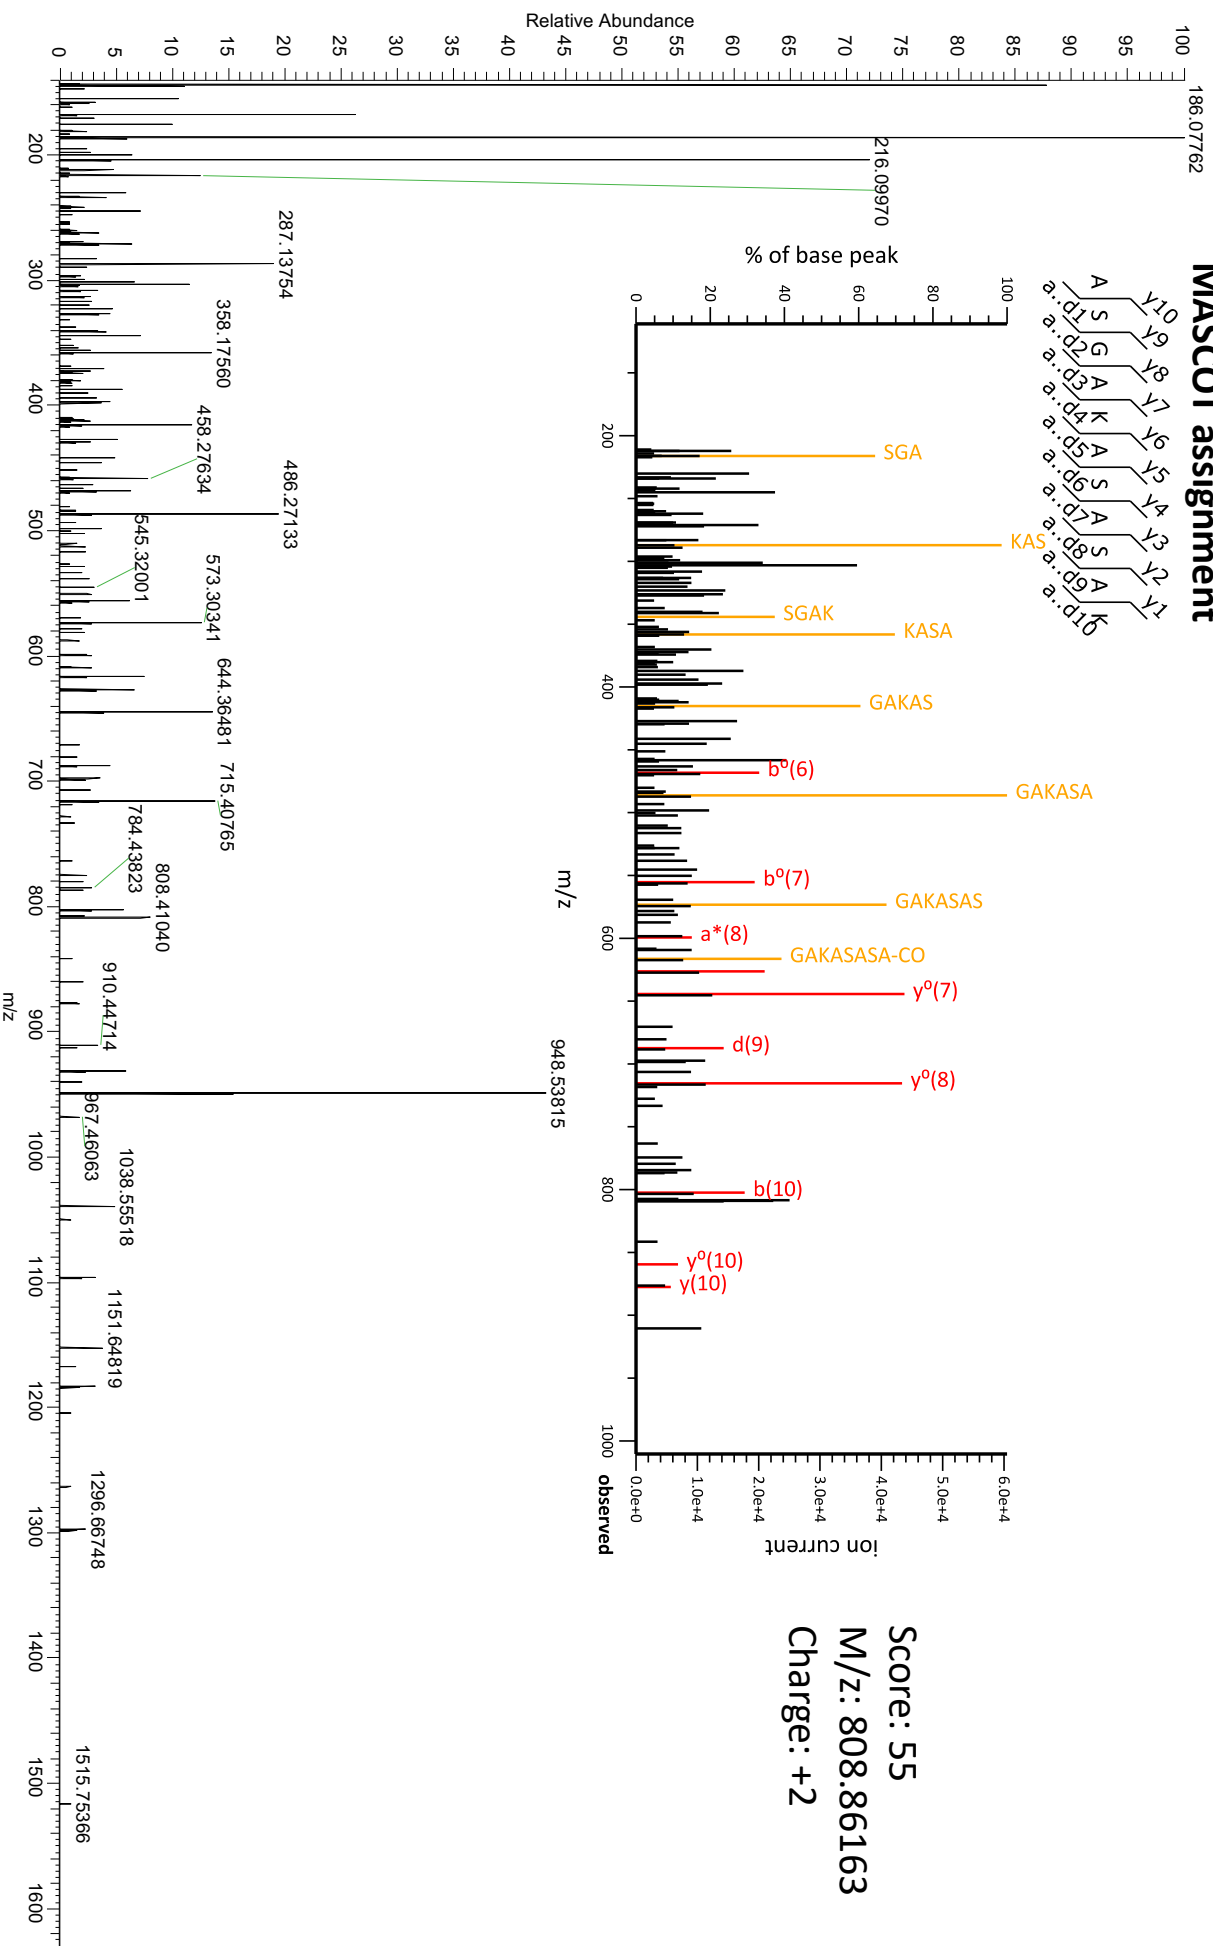

Score: 55

M/z: 808.86163

Charge: +2



ITMS-CID

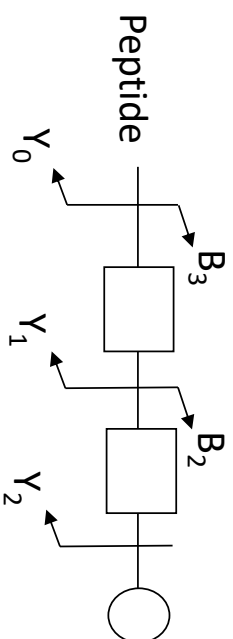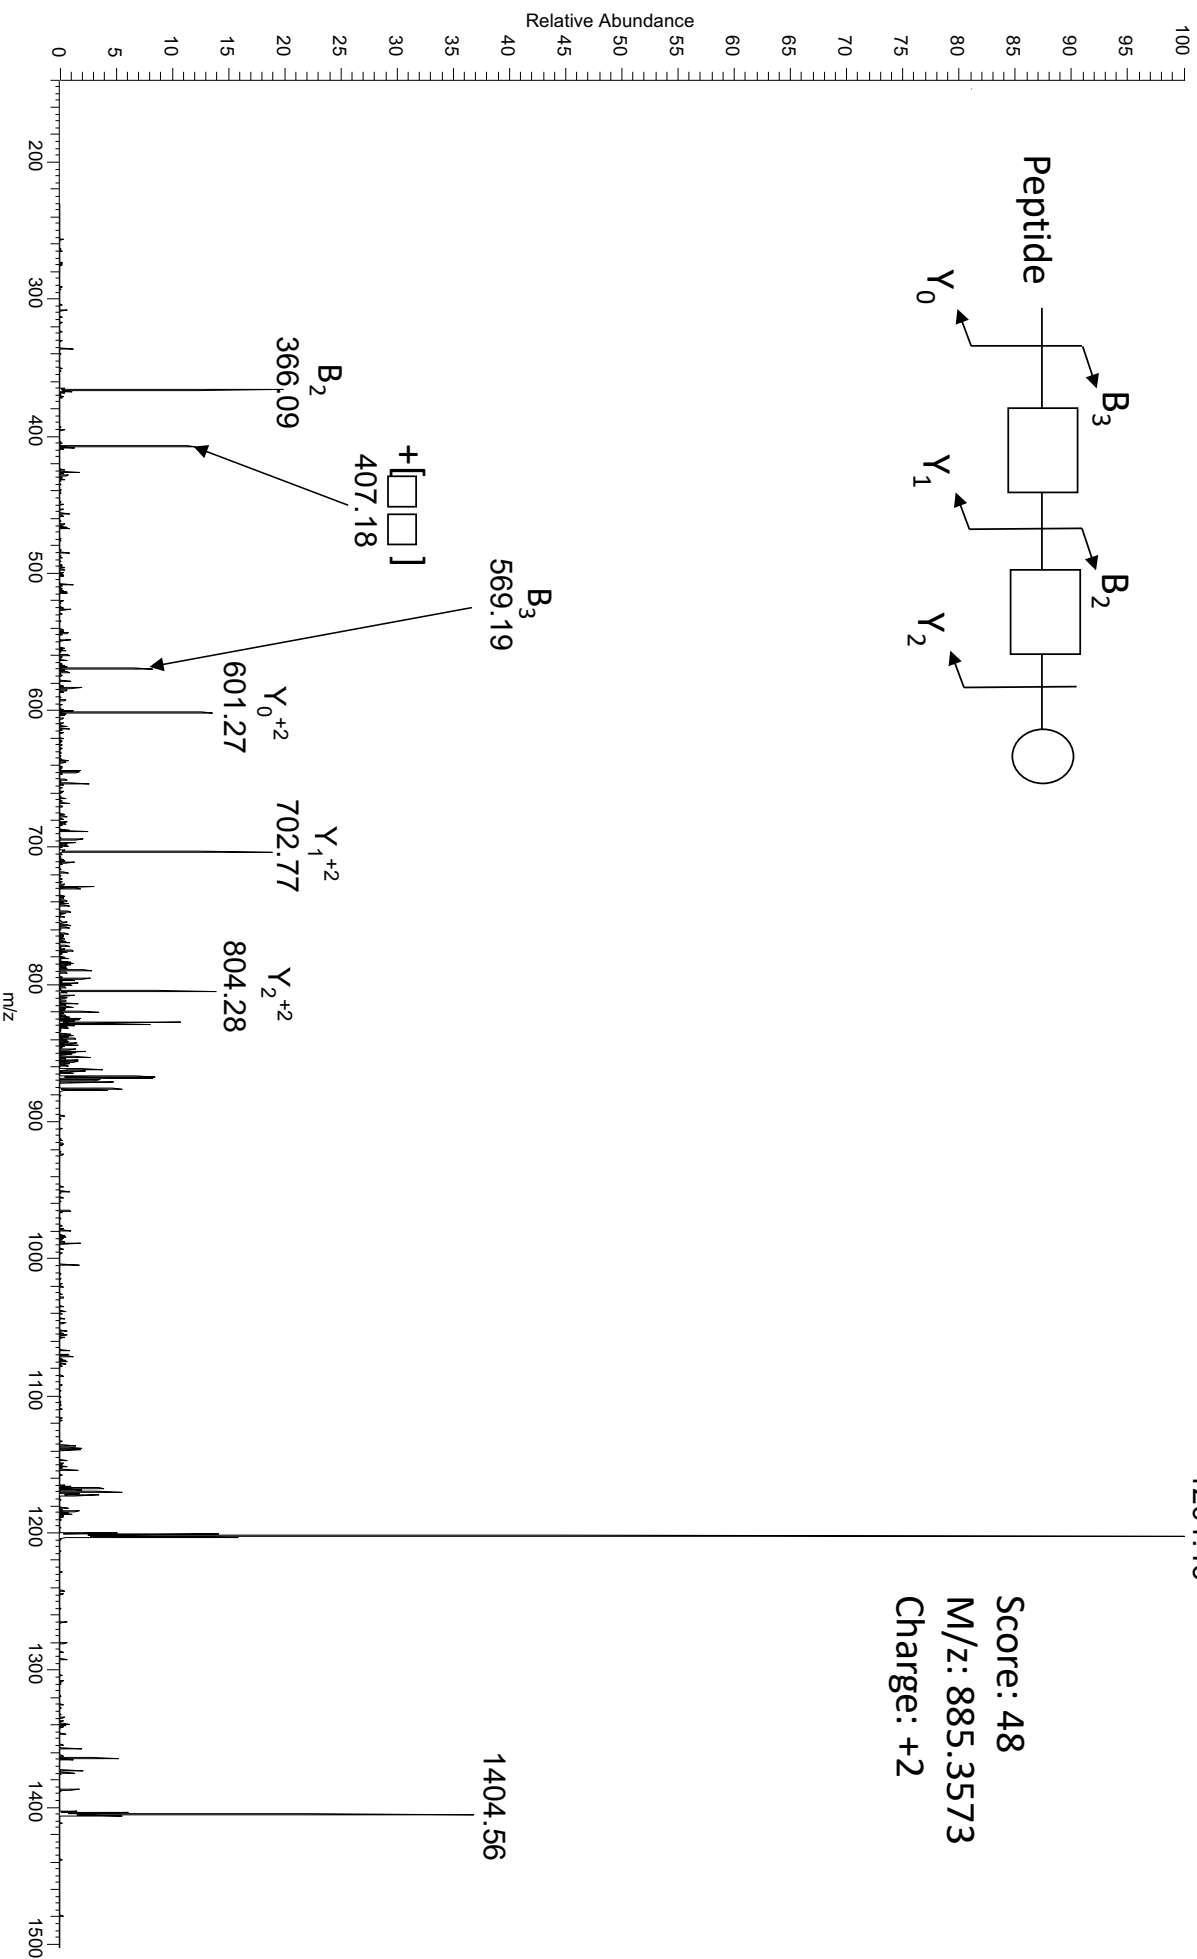

### MASCOT assignment

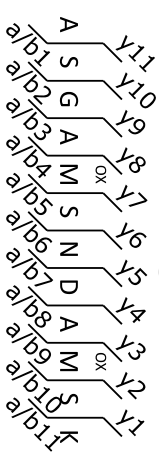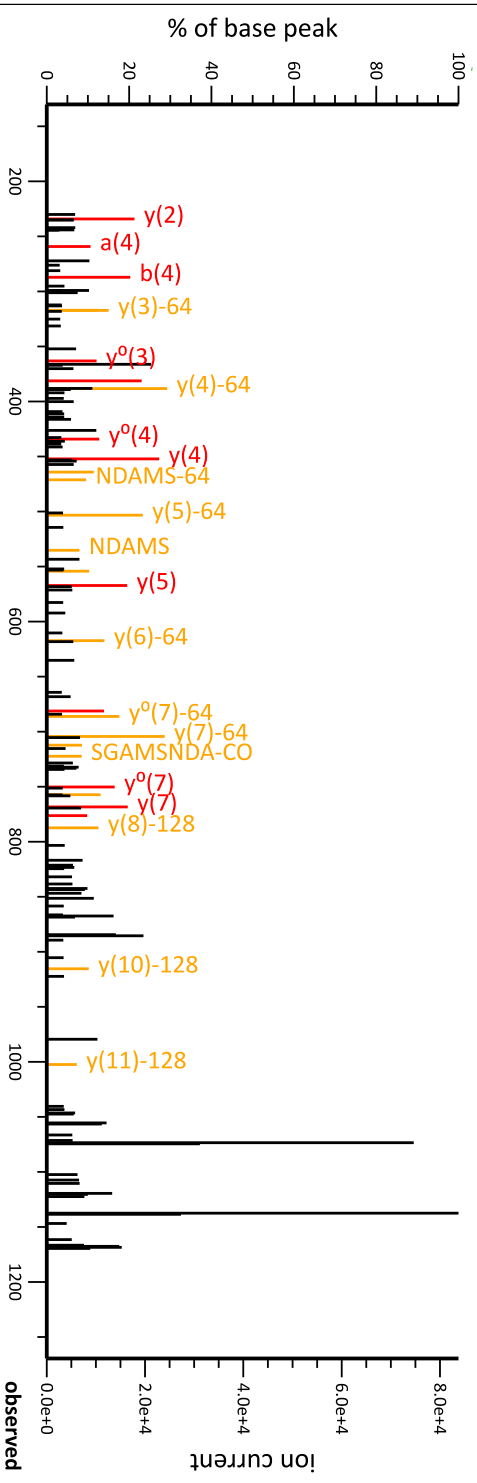

Score: 48  
M/z: 885.3573  
Charge: +2

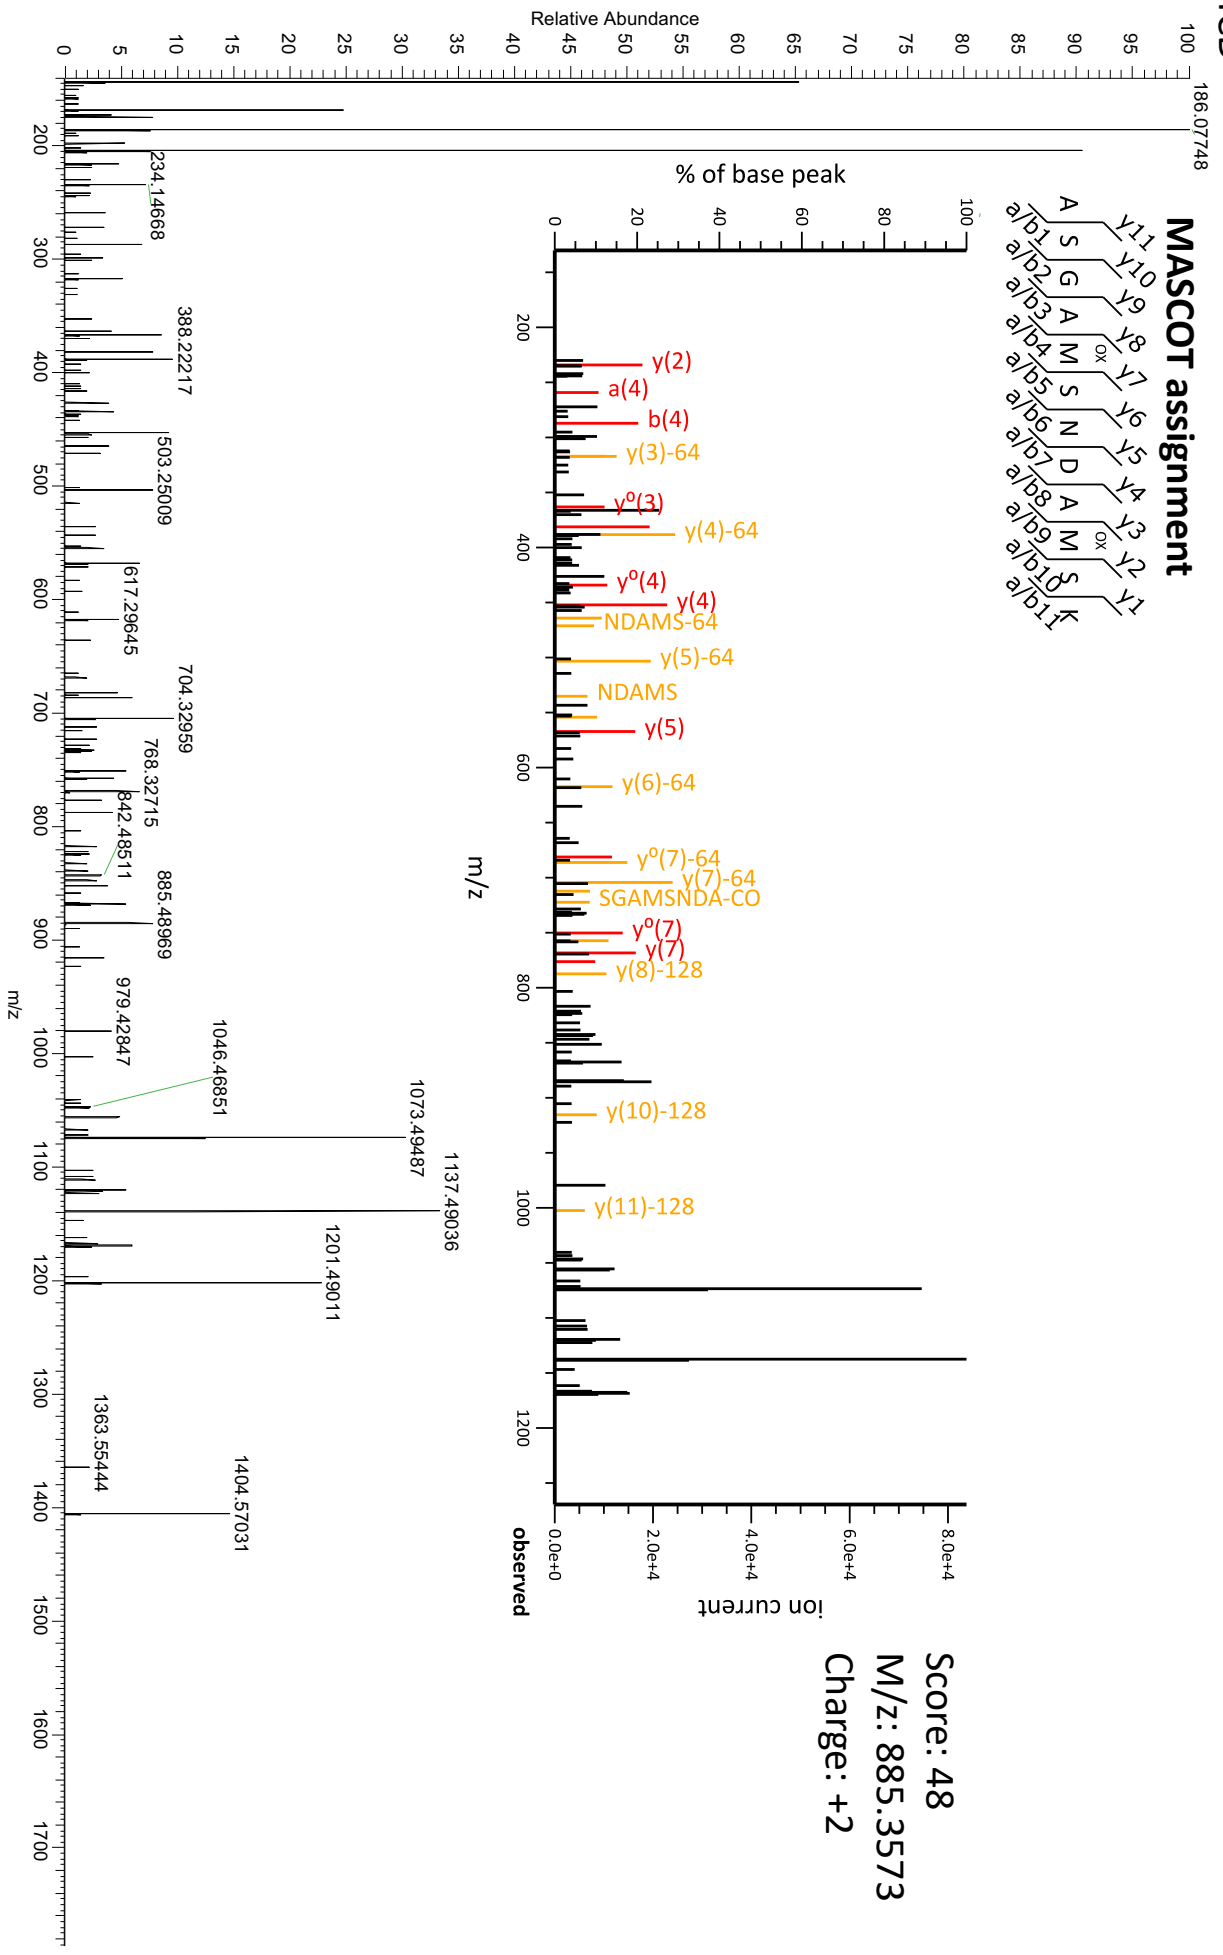

ITMS-CID

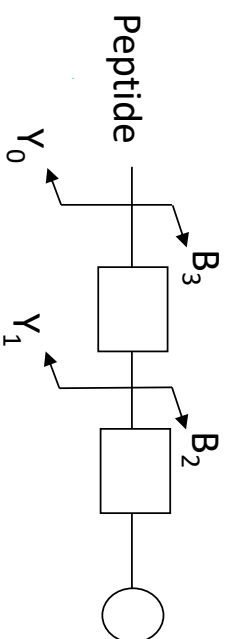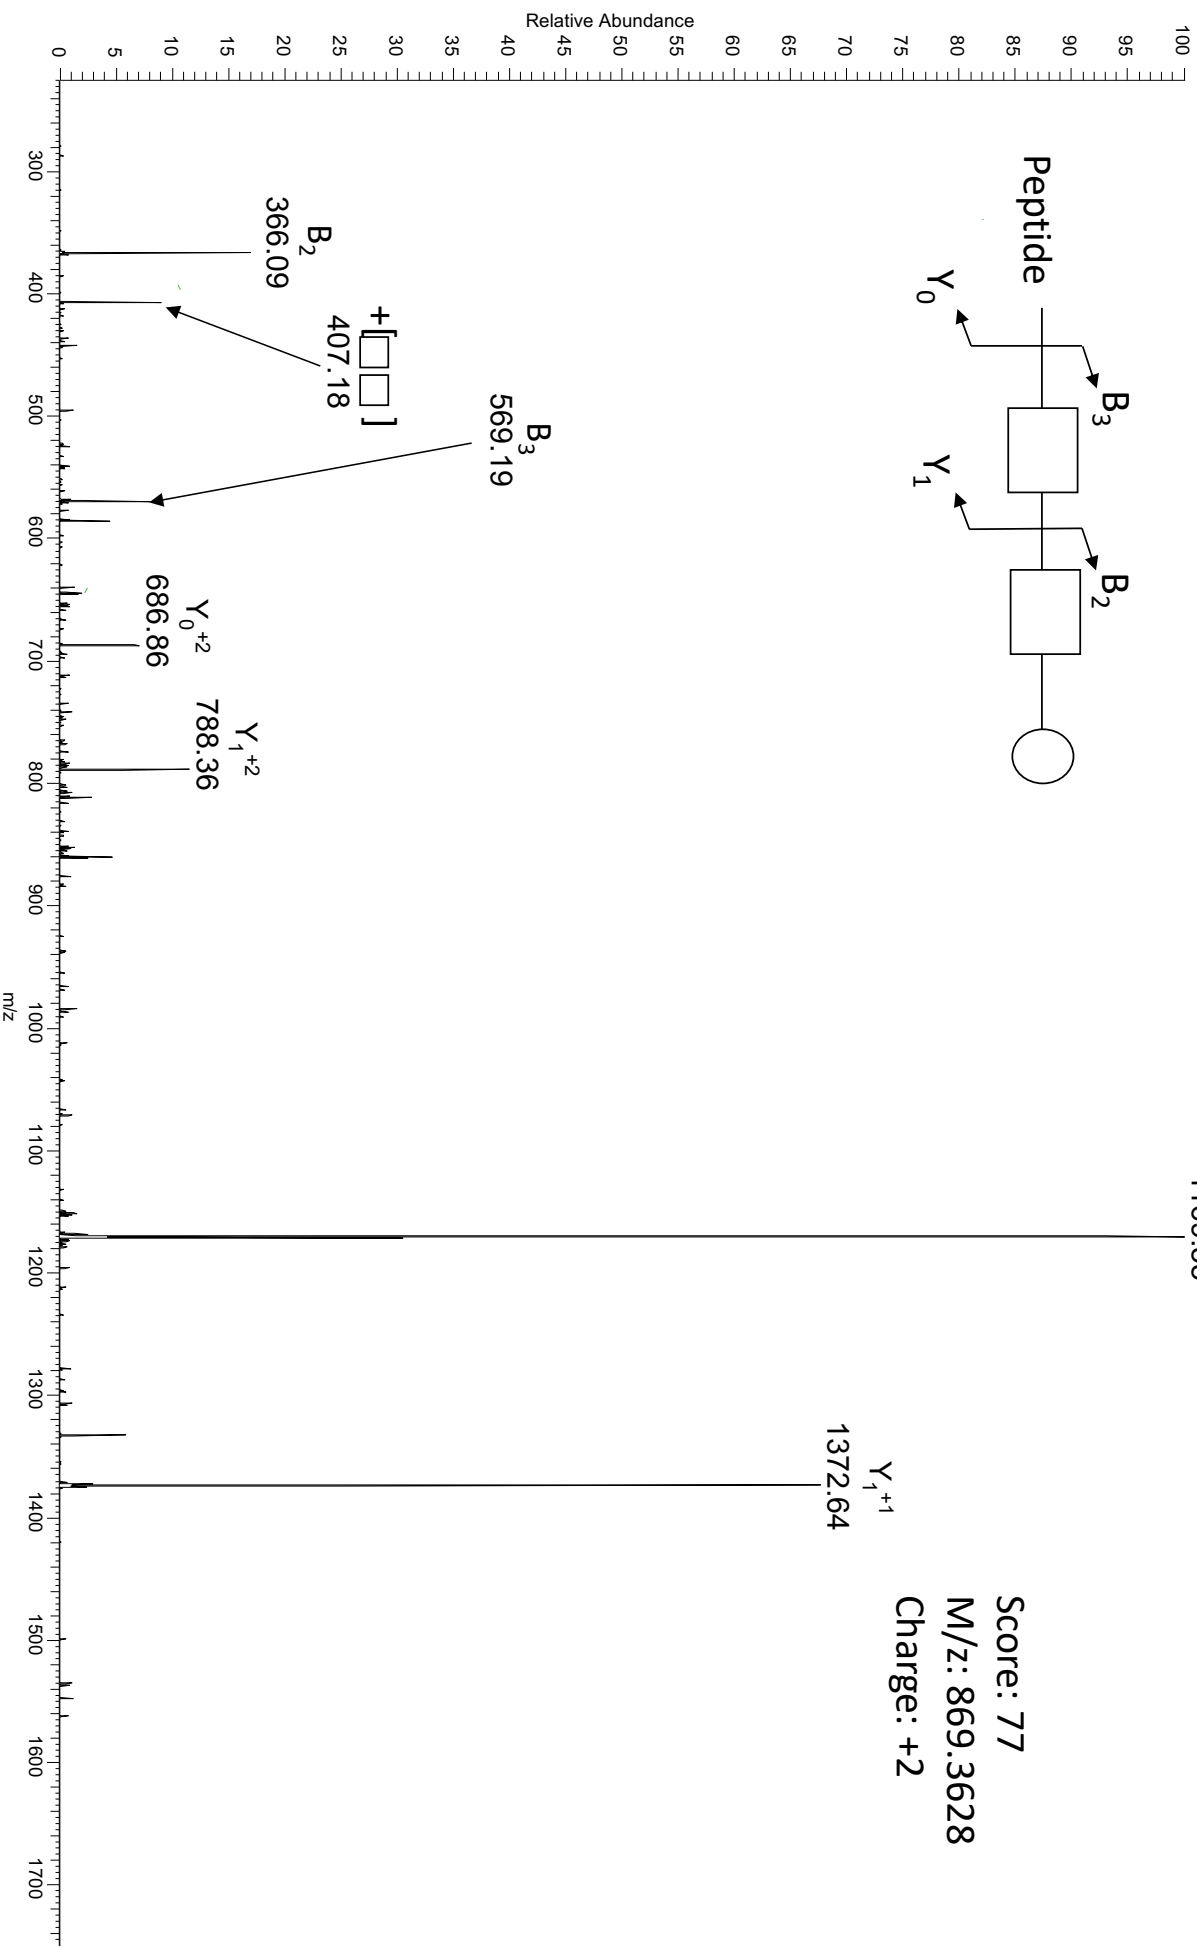

Score: 77  
M/z: 869.3628  
Charge: +2

MASCOT assignment

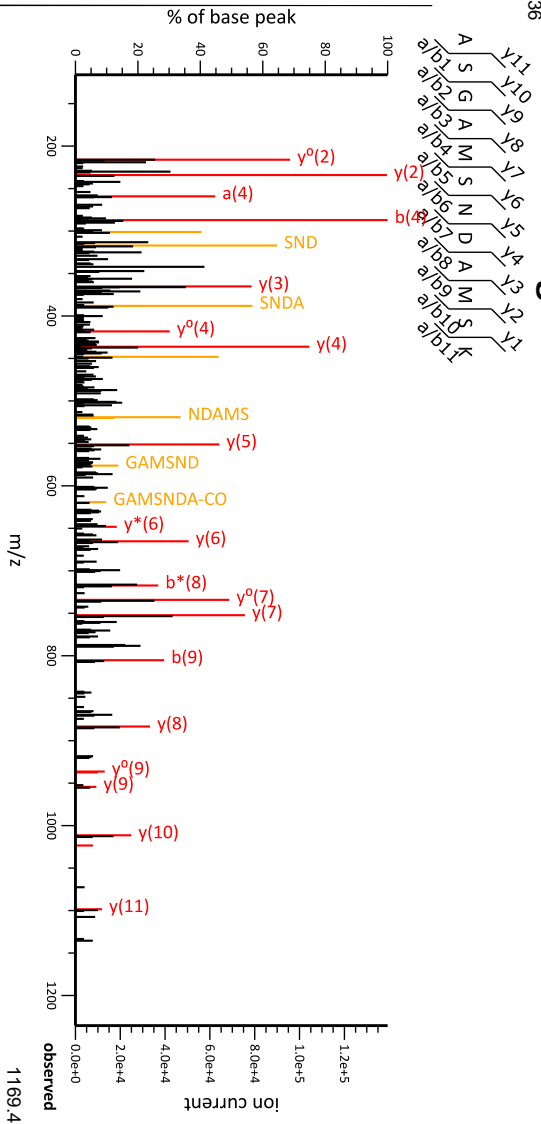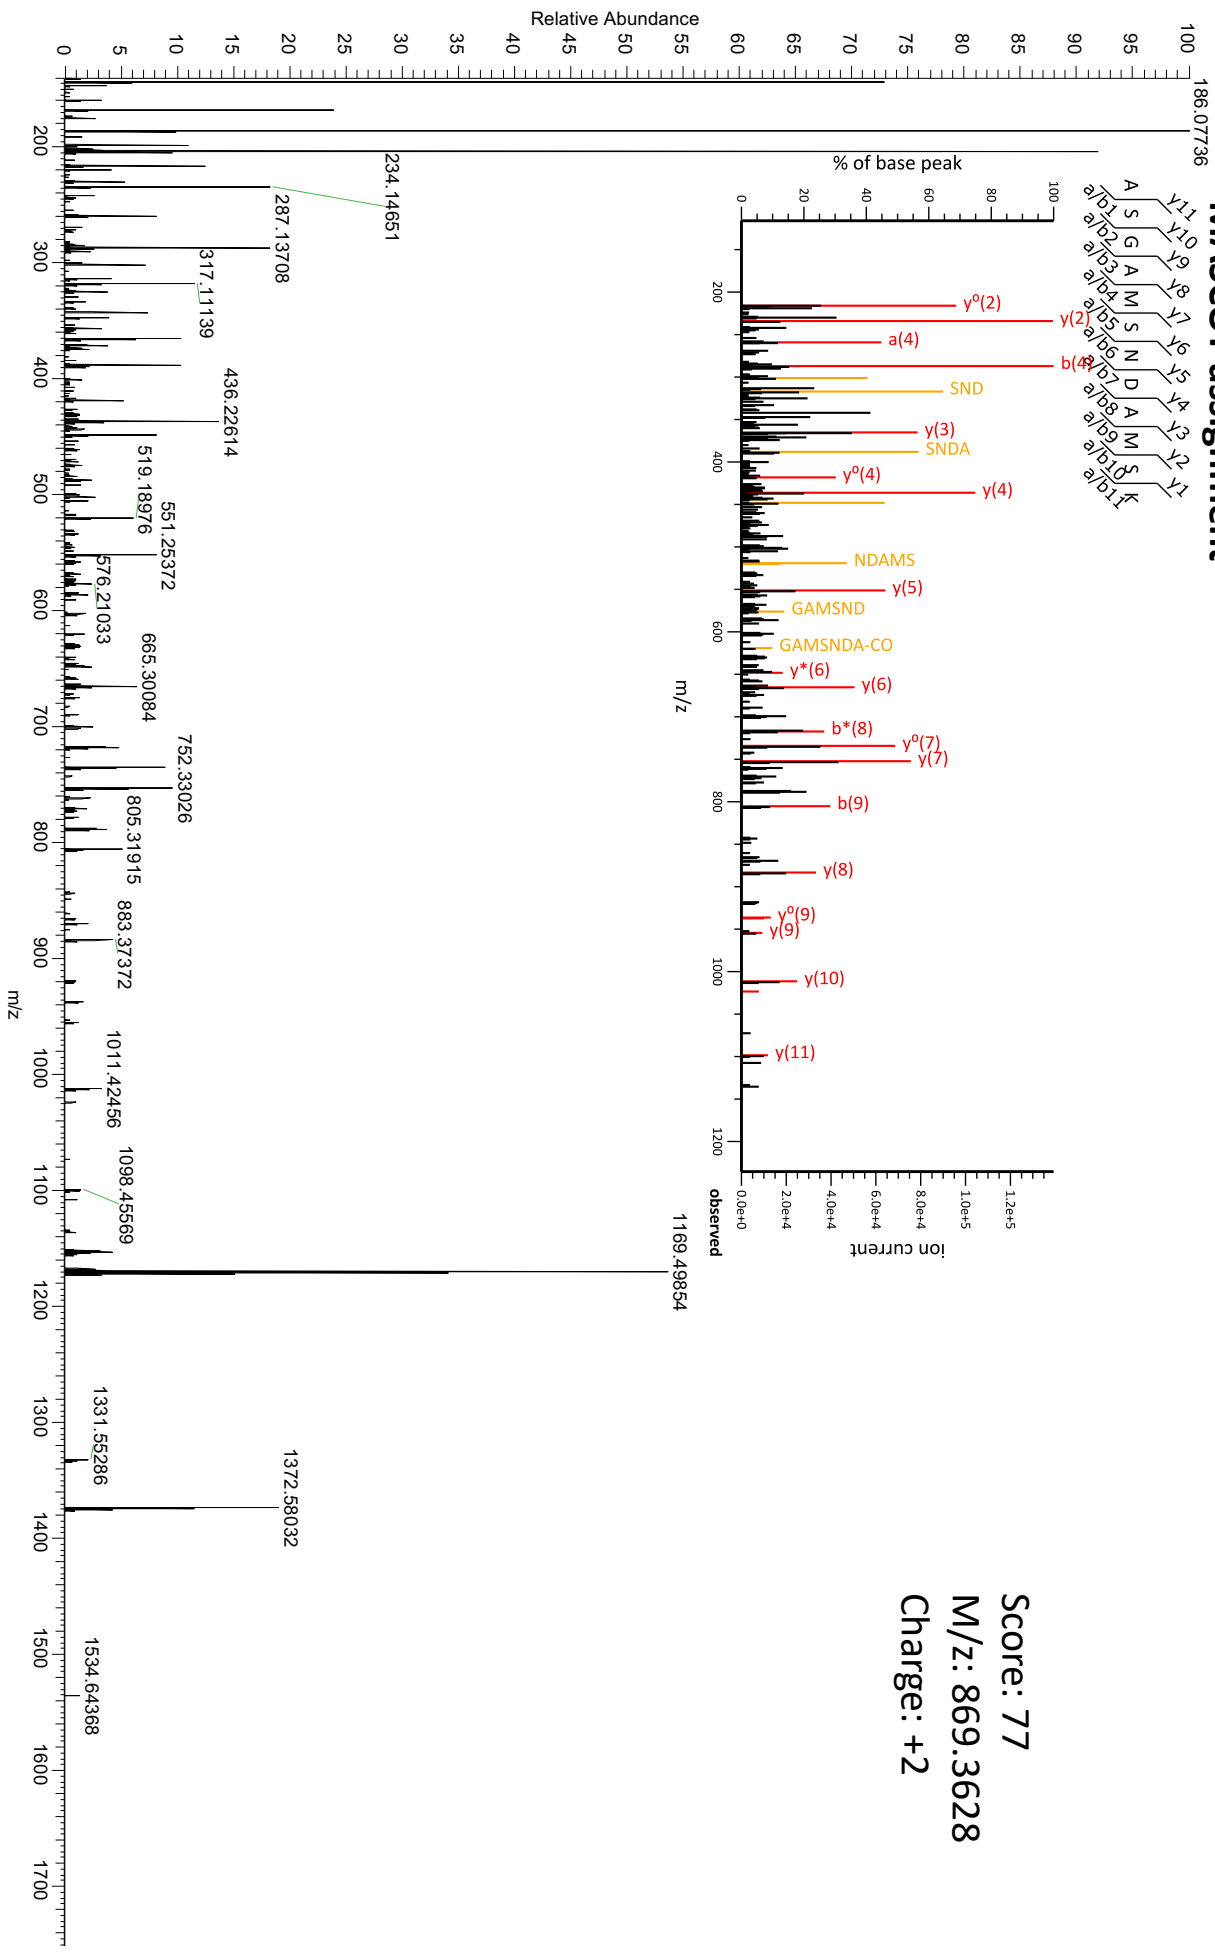

Score: 77

M/z: 869.3628

Charge: +2

ITMS-CID

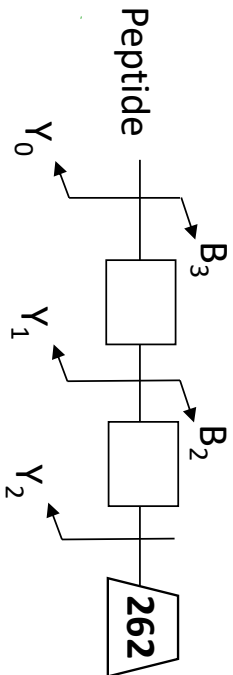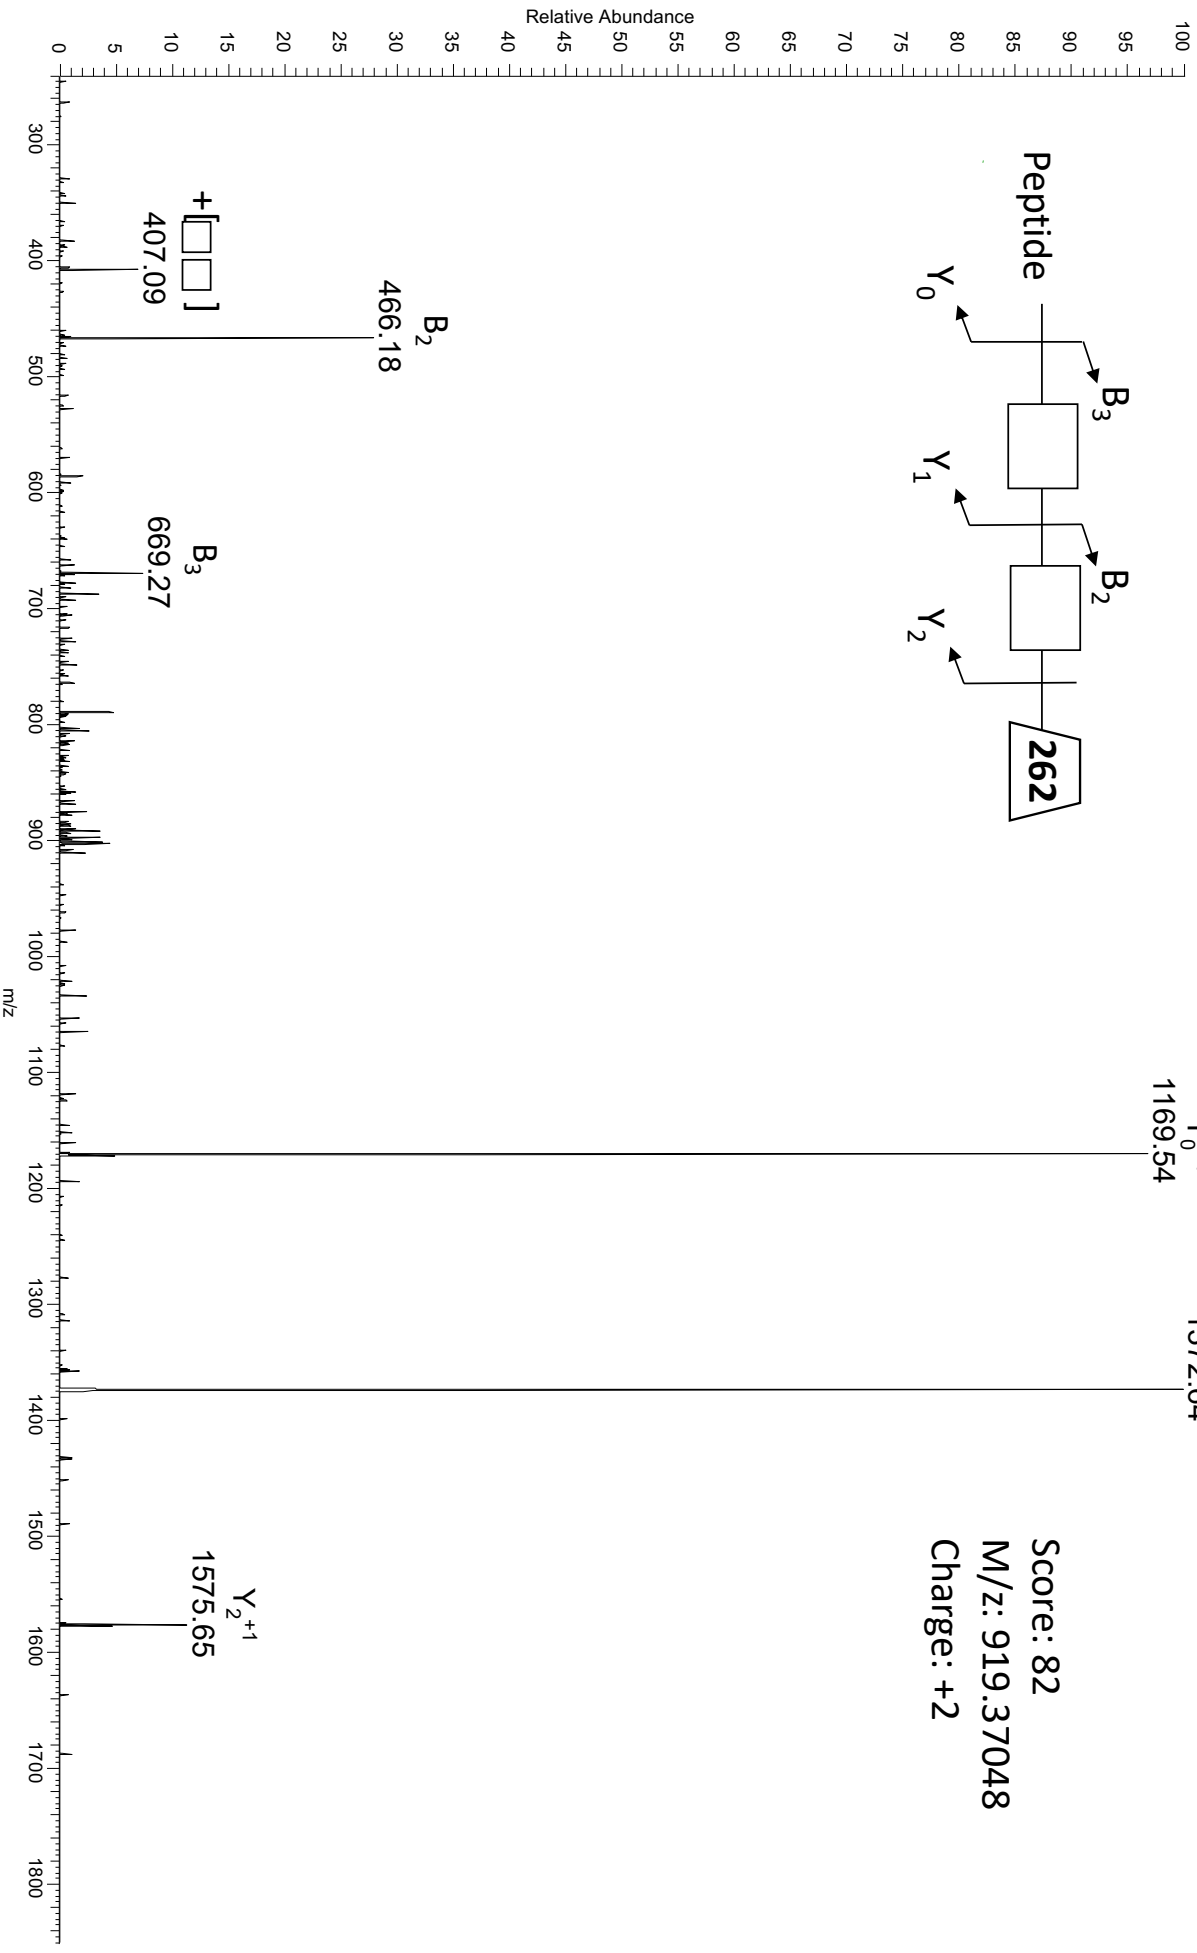

Score: 82

M/z: 919.37048

Charge: +2

### MASCOT assignment

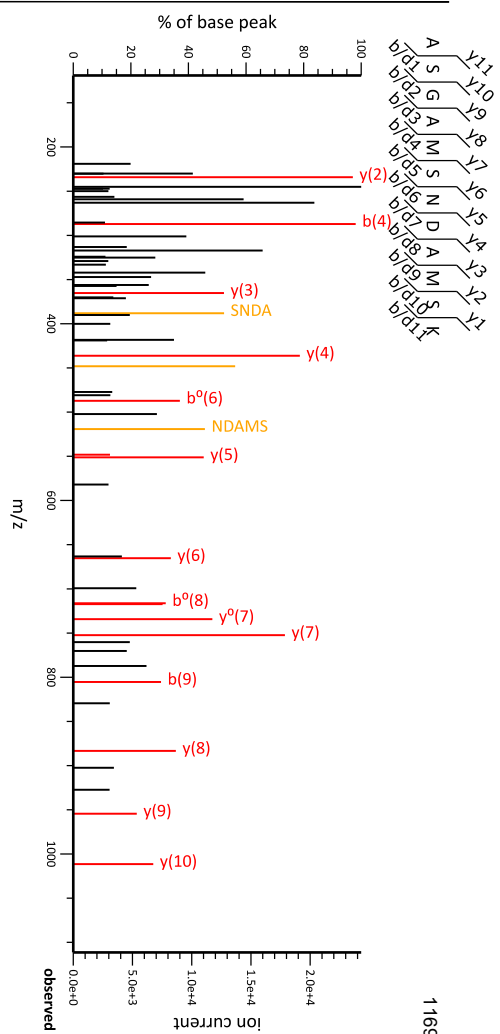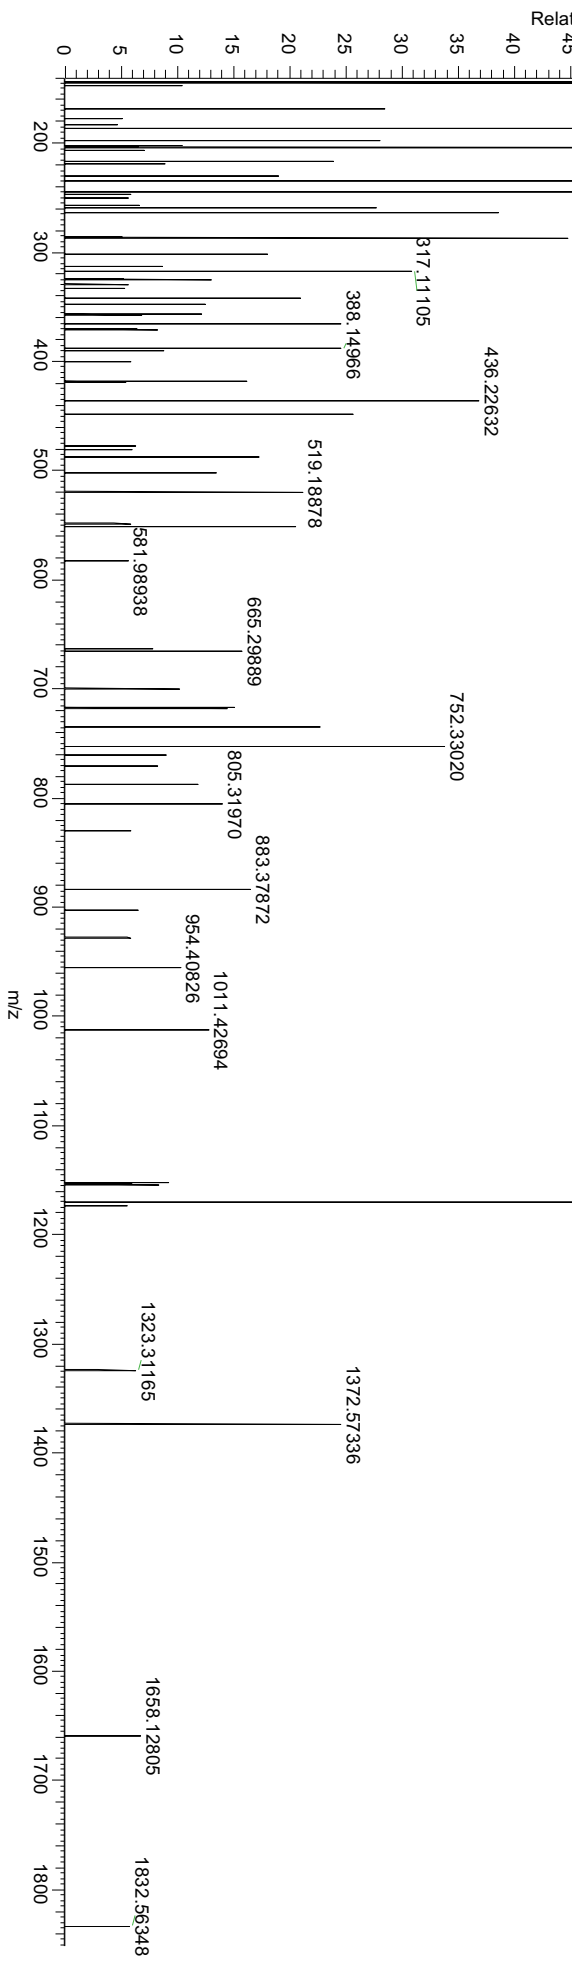

Score: 82  
M/z: 919.37048  
Charge: +2

ITMS-CID

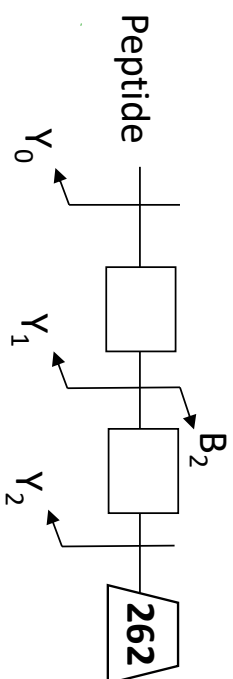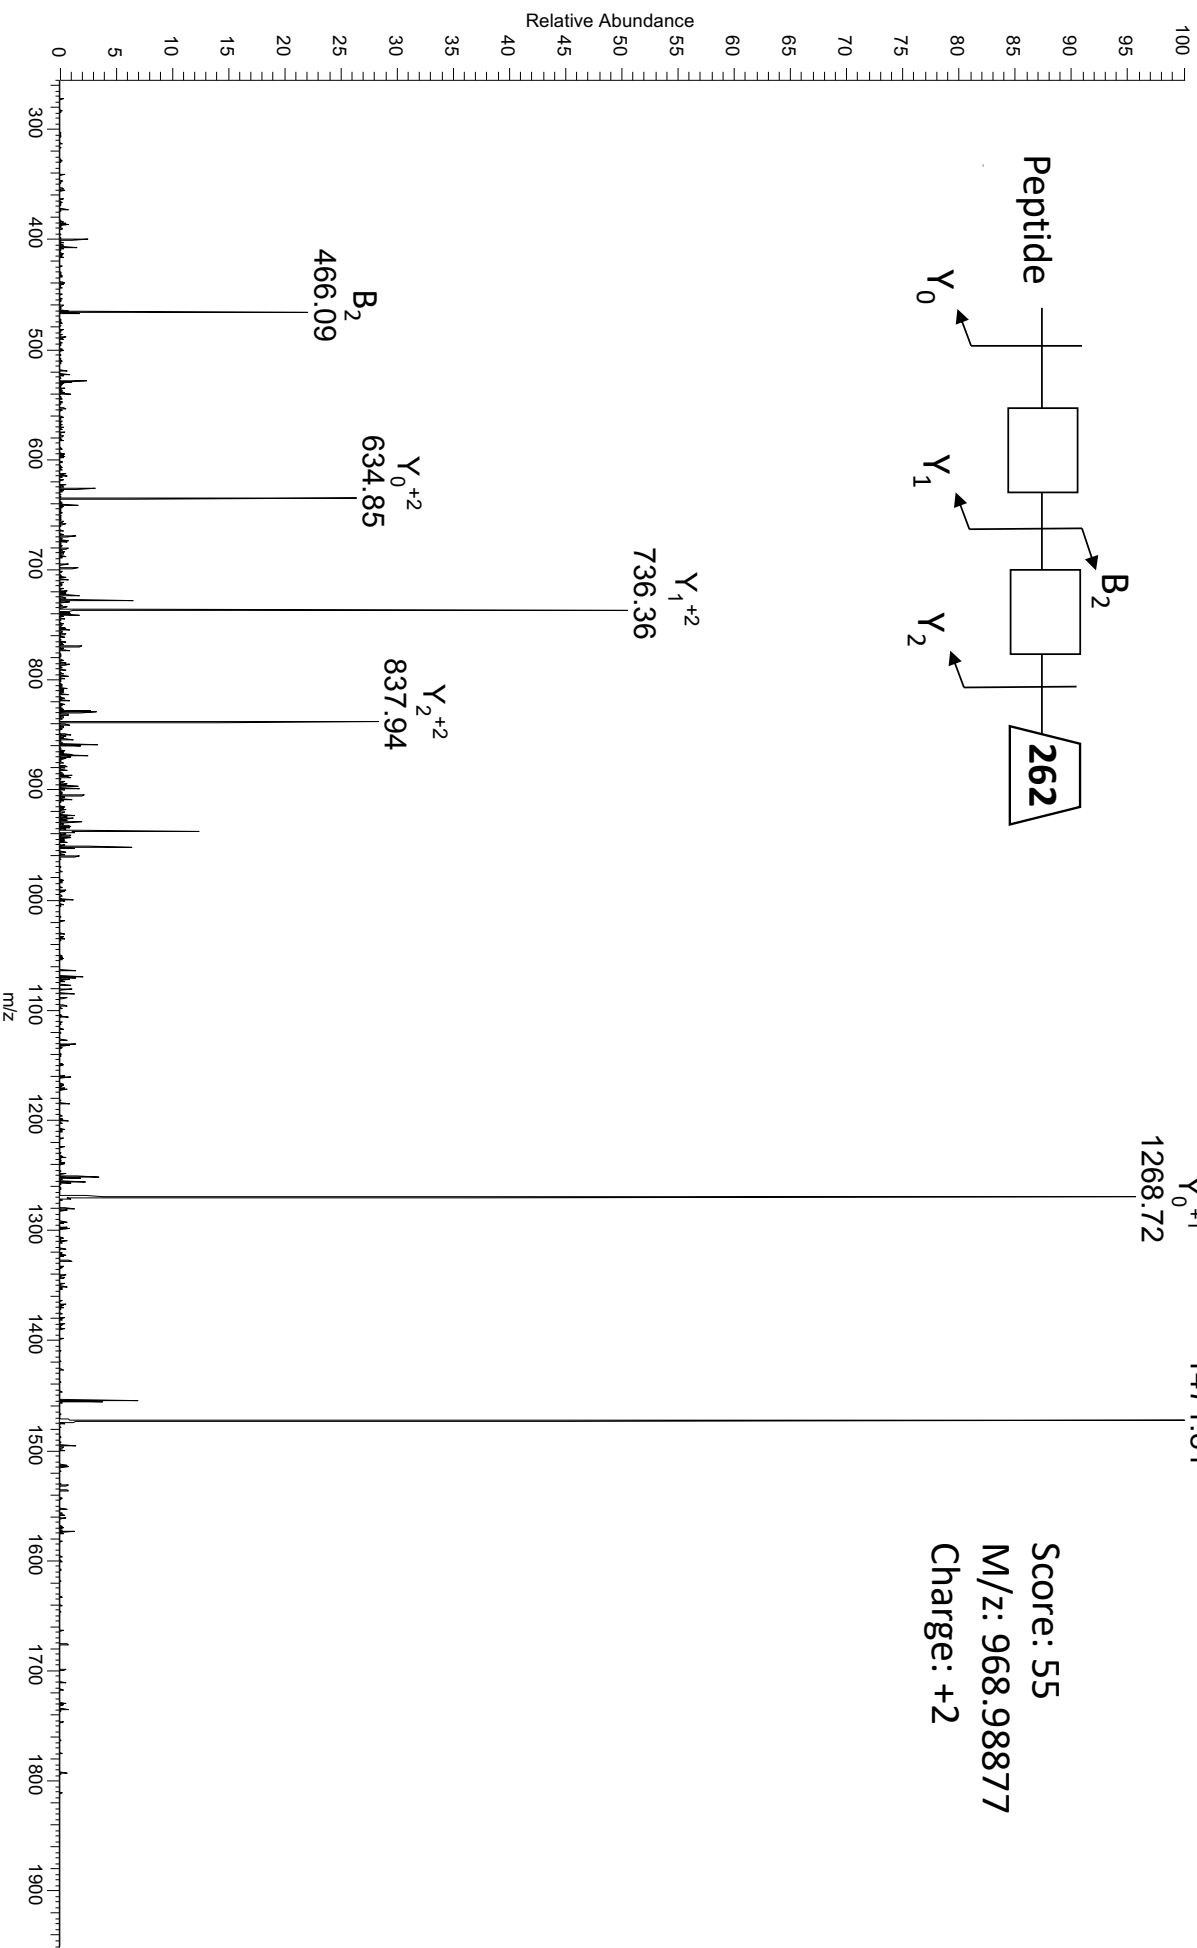

1268.74146

### MASCOT assignment

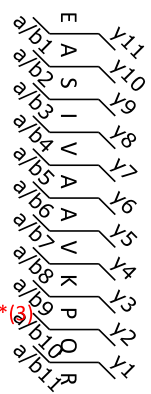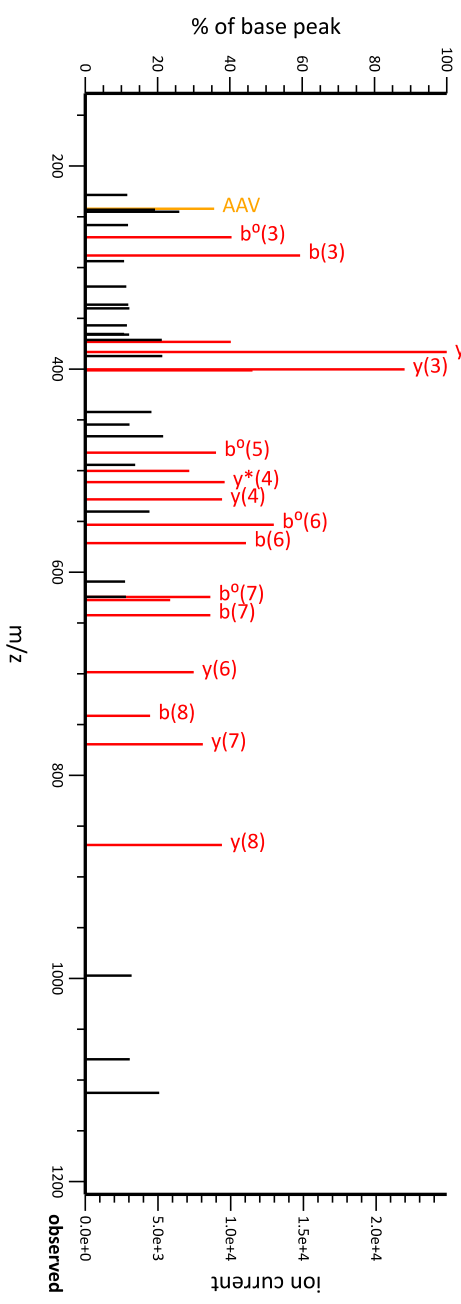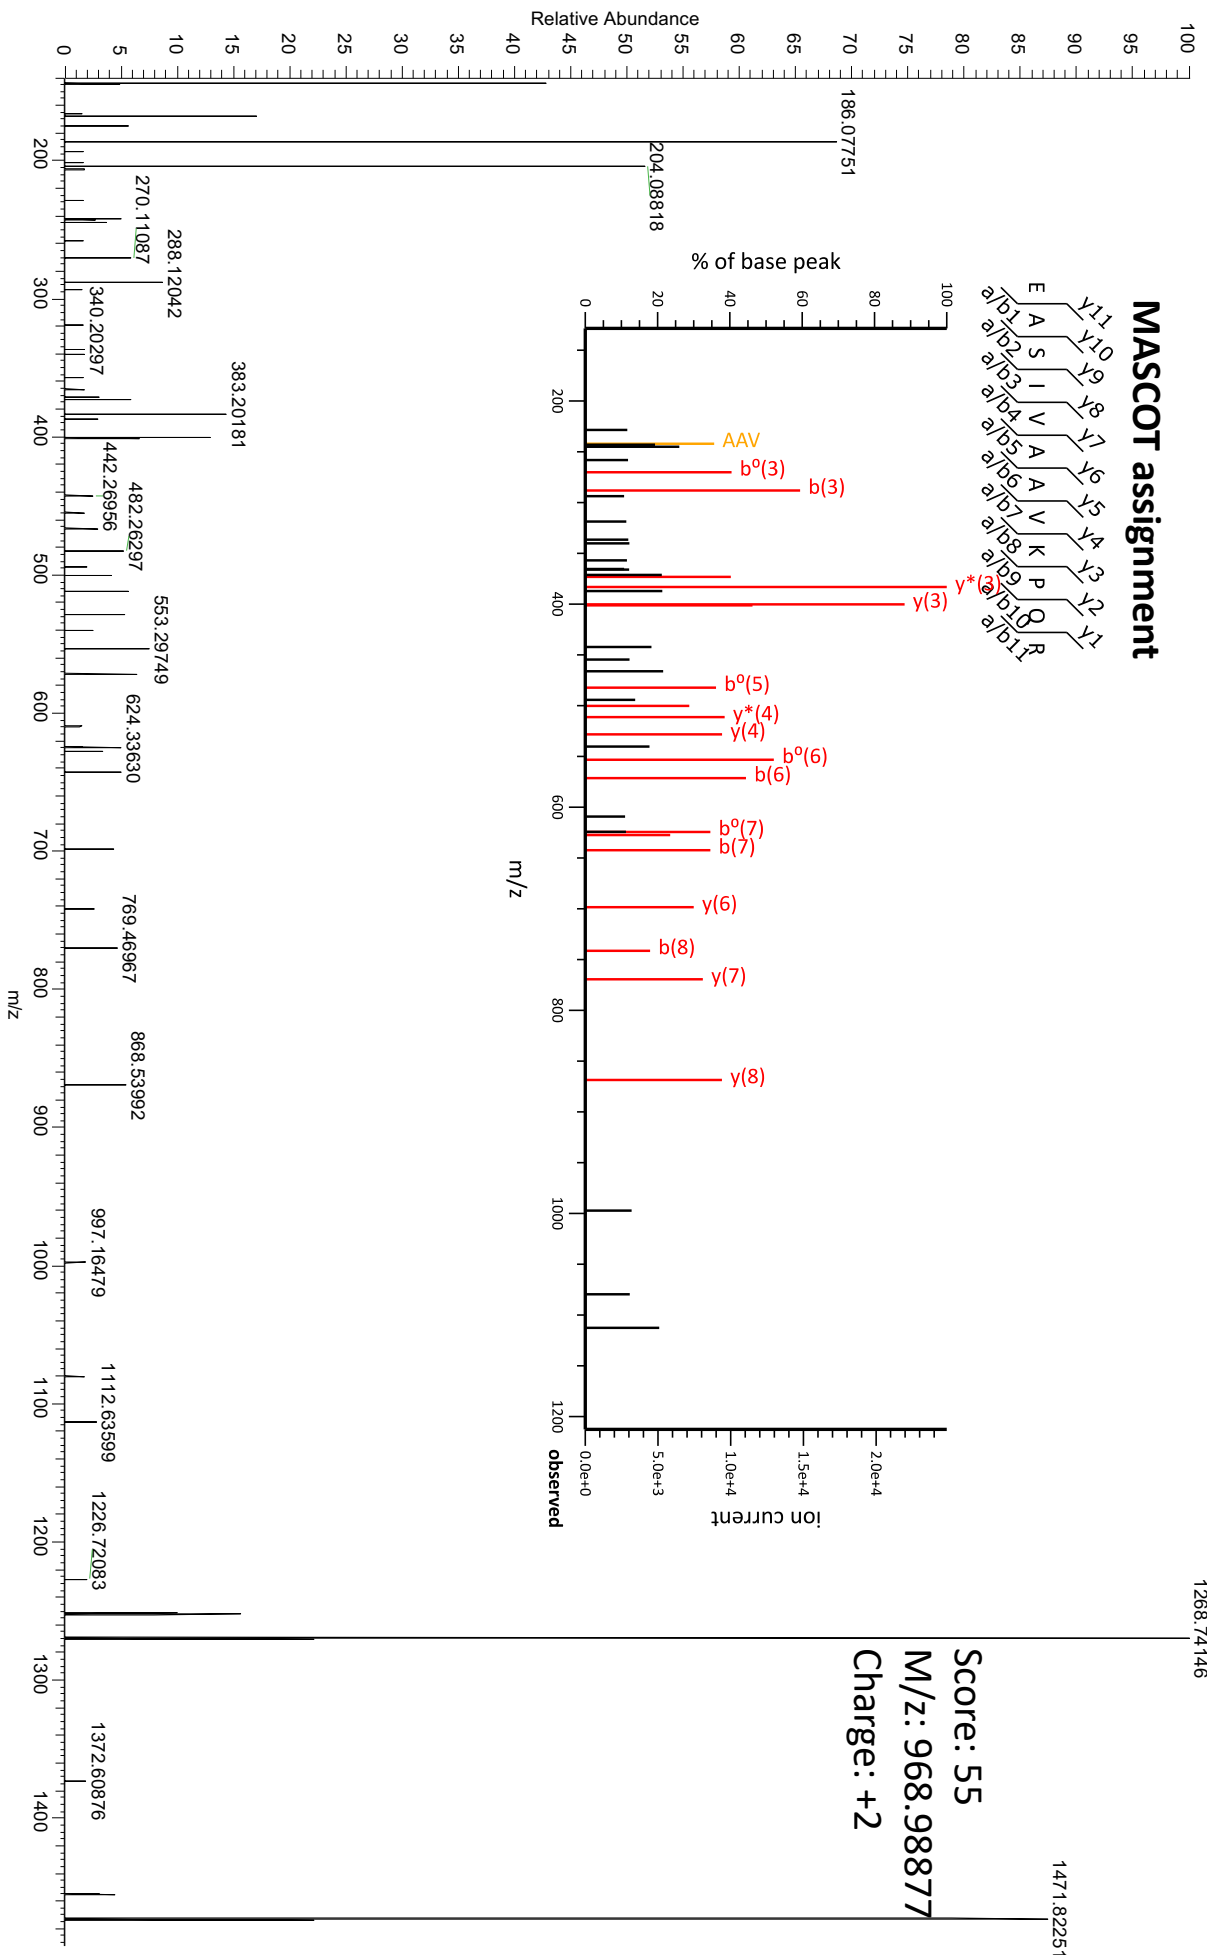

1471.82251

Score: 55  
M/z: 968.98877  
Charge: +2



ITMS-CID

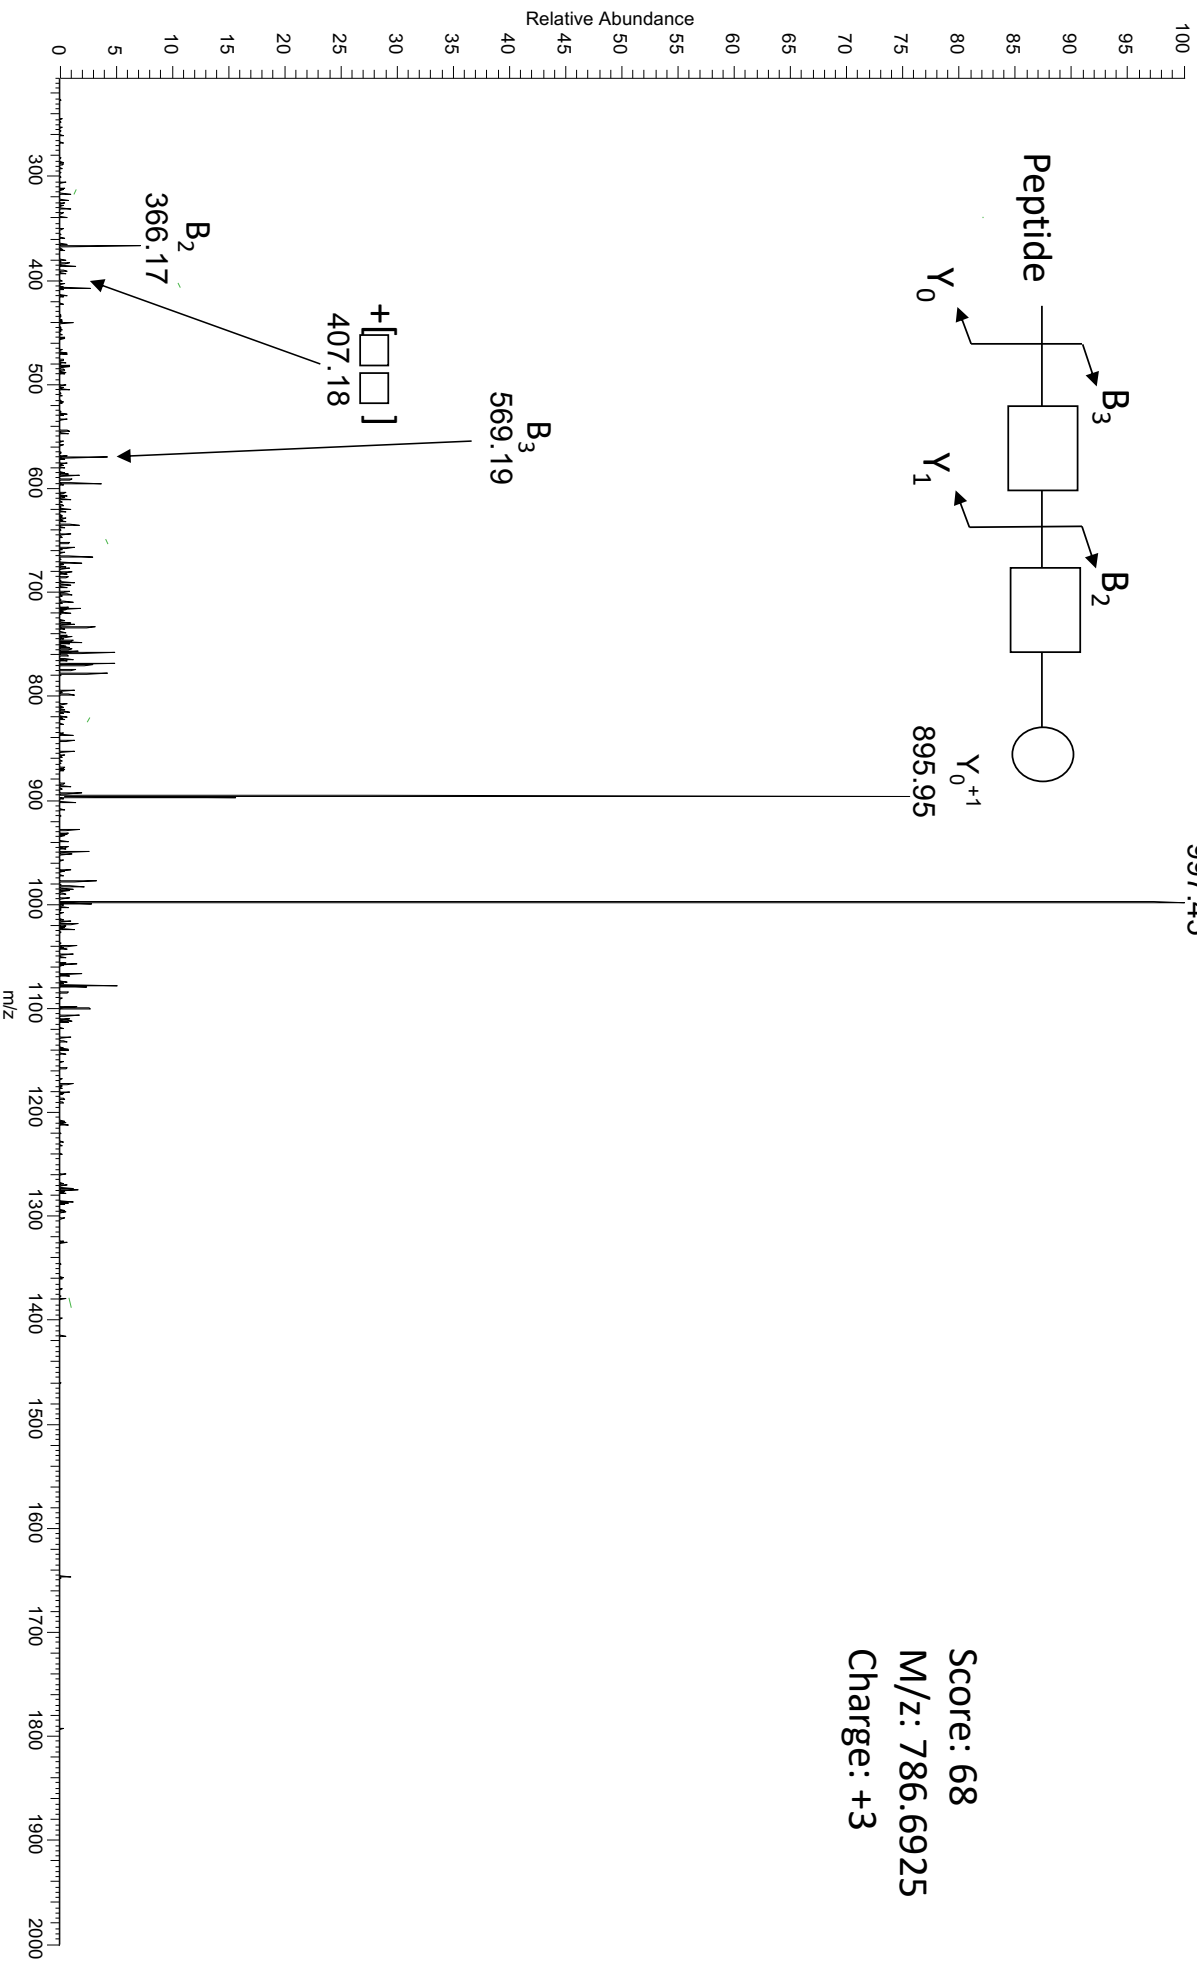

Score: 68  
M/z: 786.6925  
Charge: +3

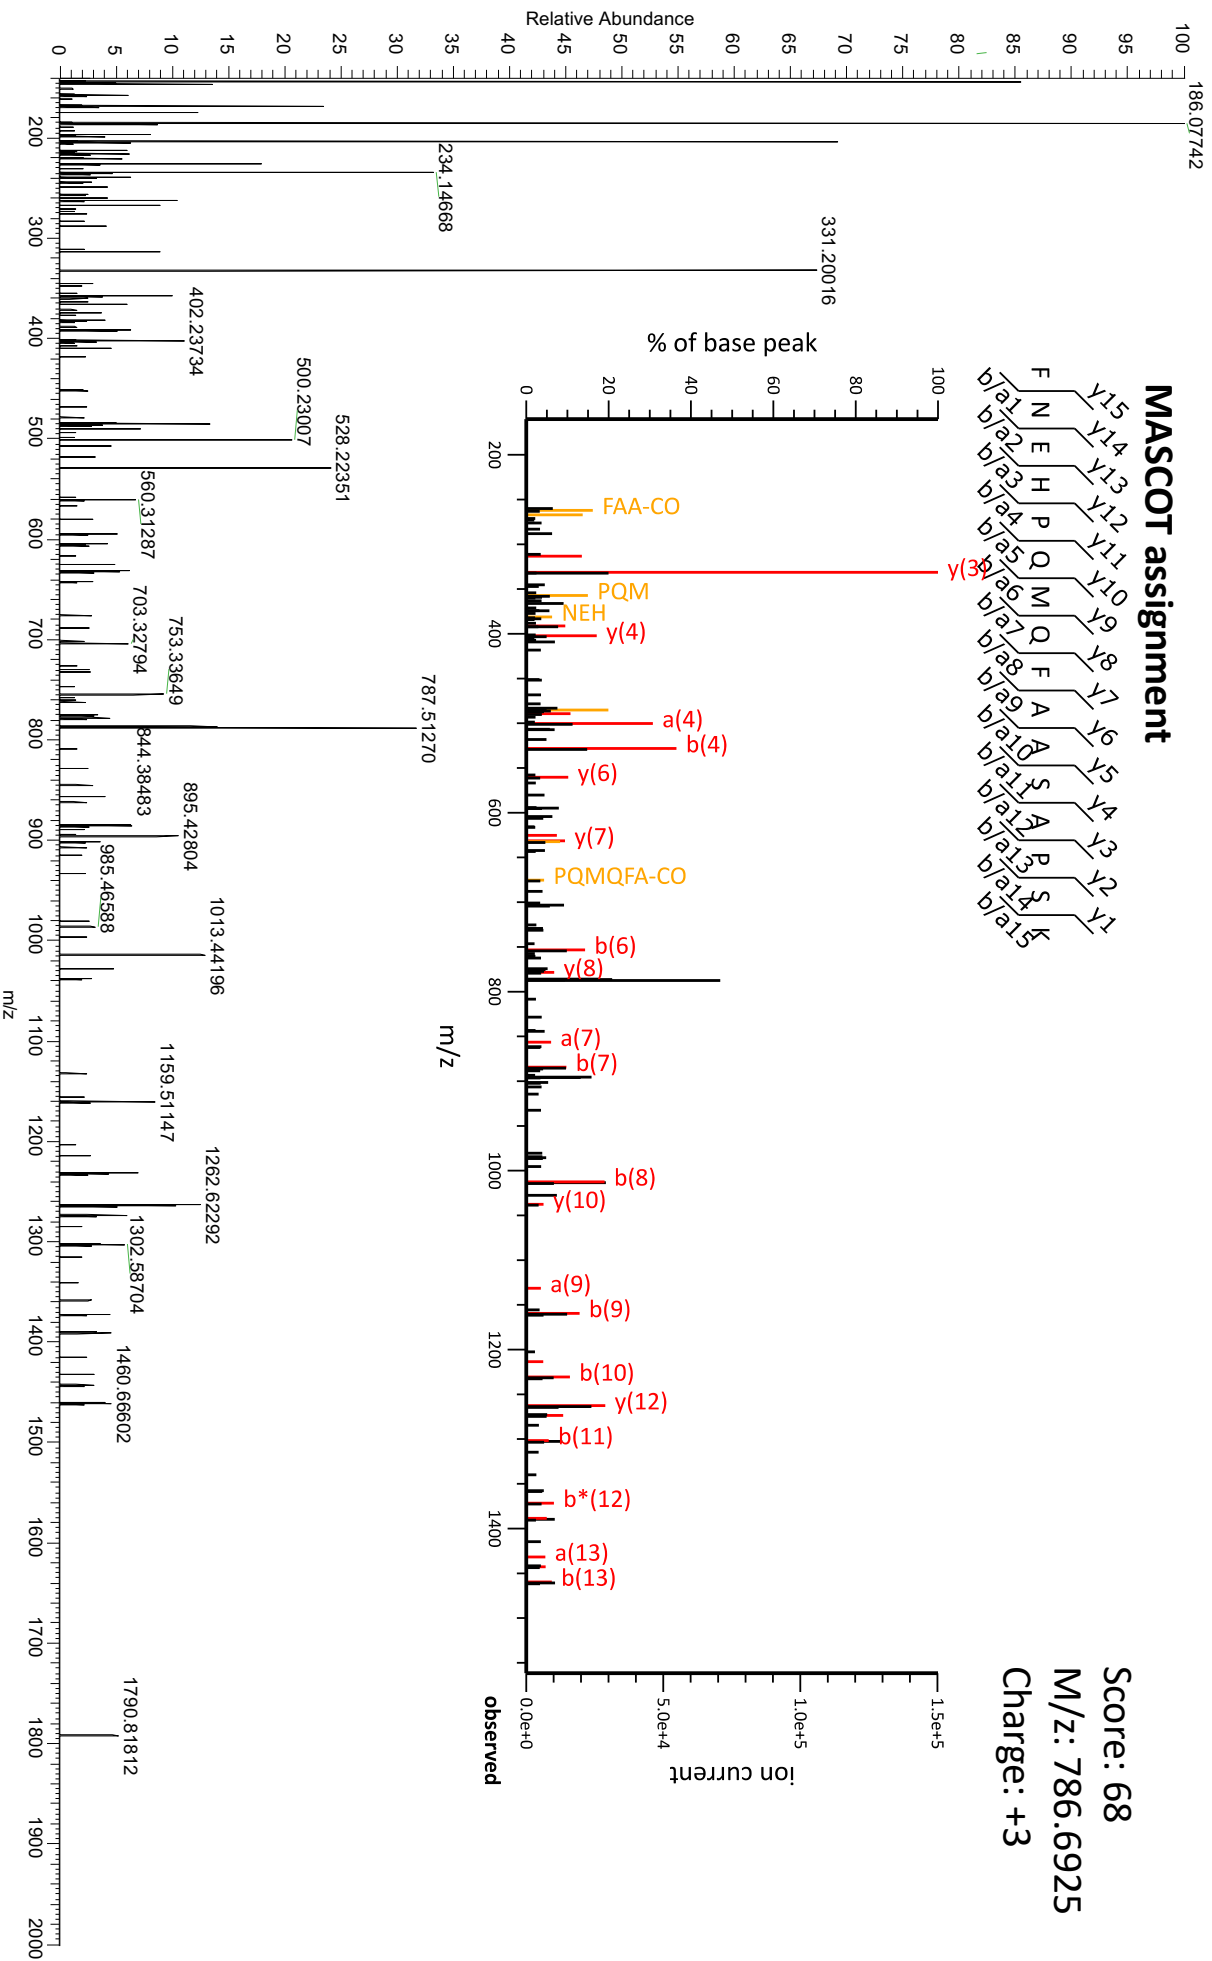

### MASCOT assignment

F y15  
N y14  
E y13  
H y12  
P y11  
Q y10  
M y9  
Q y8  
F y7  
A y6  
A y5  
S y4  
P y3  
S y2  
K y1

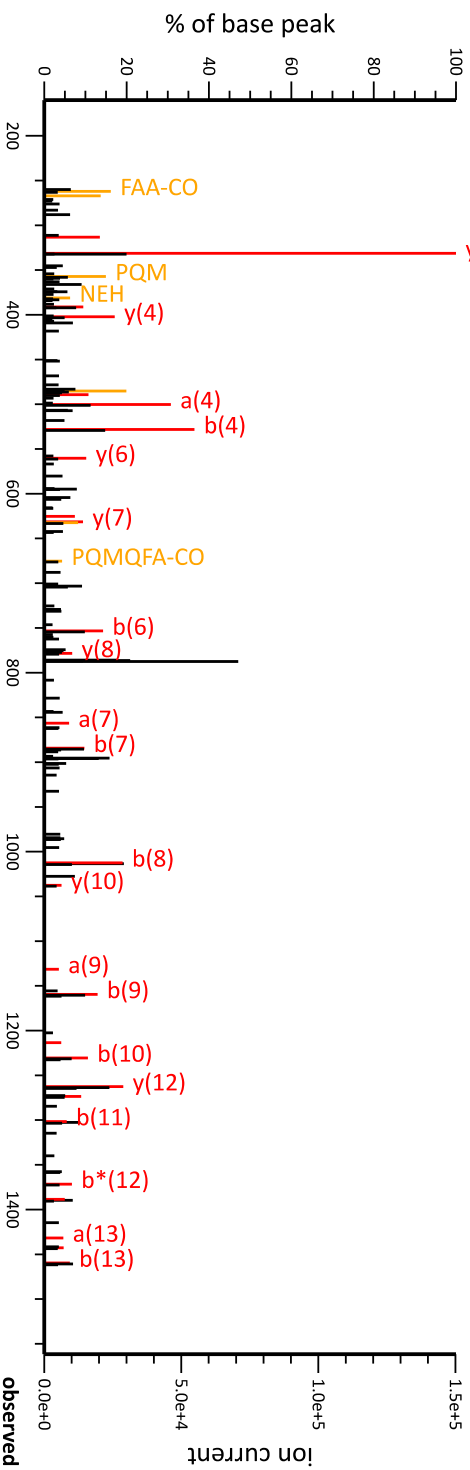

Score: 68  
M/z: 786.6925  
Charge: +3

ITMS-CID

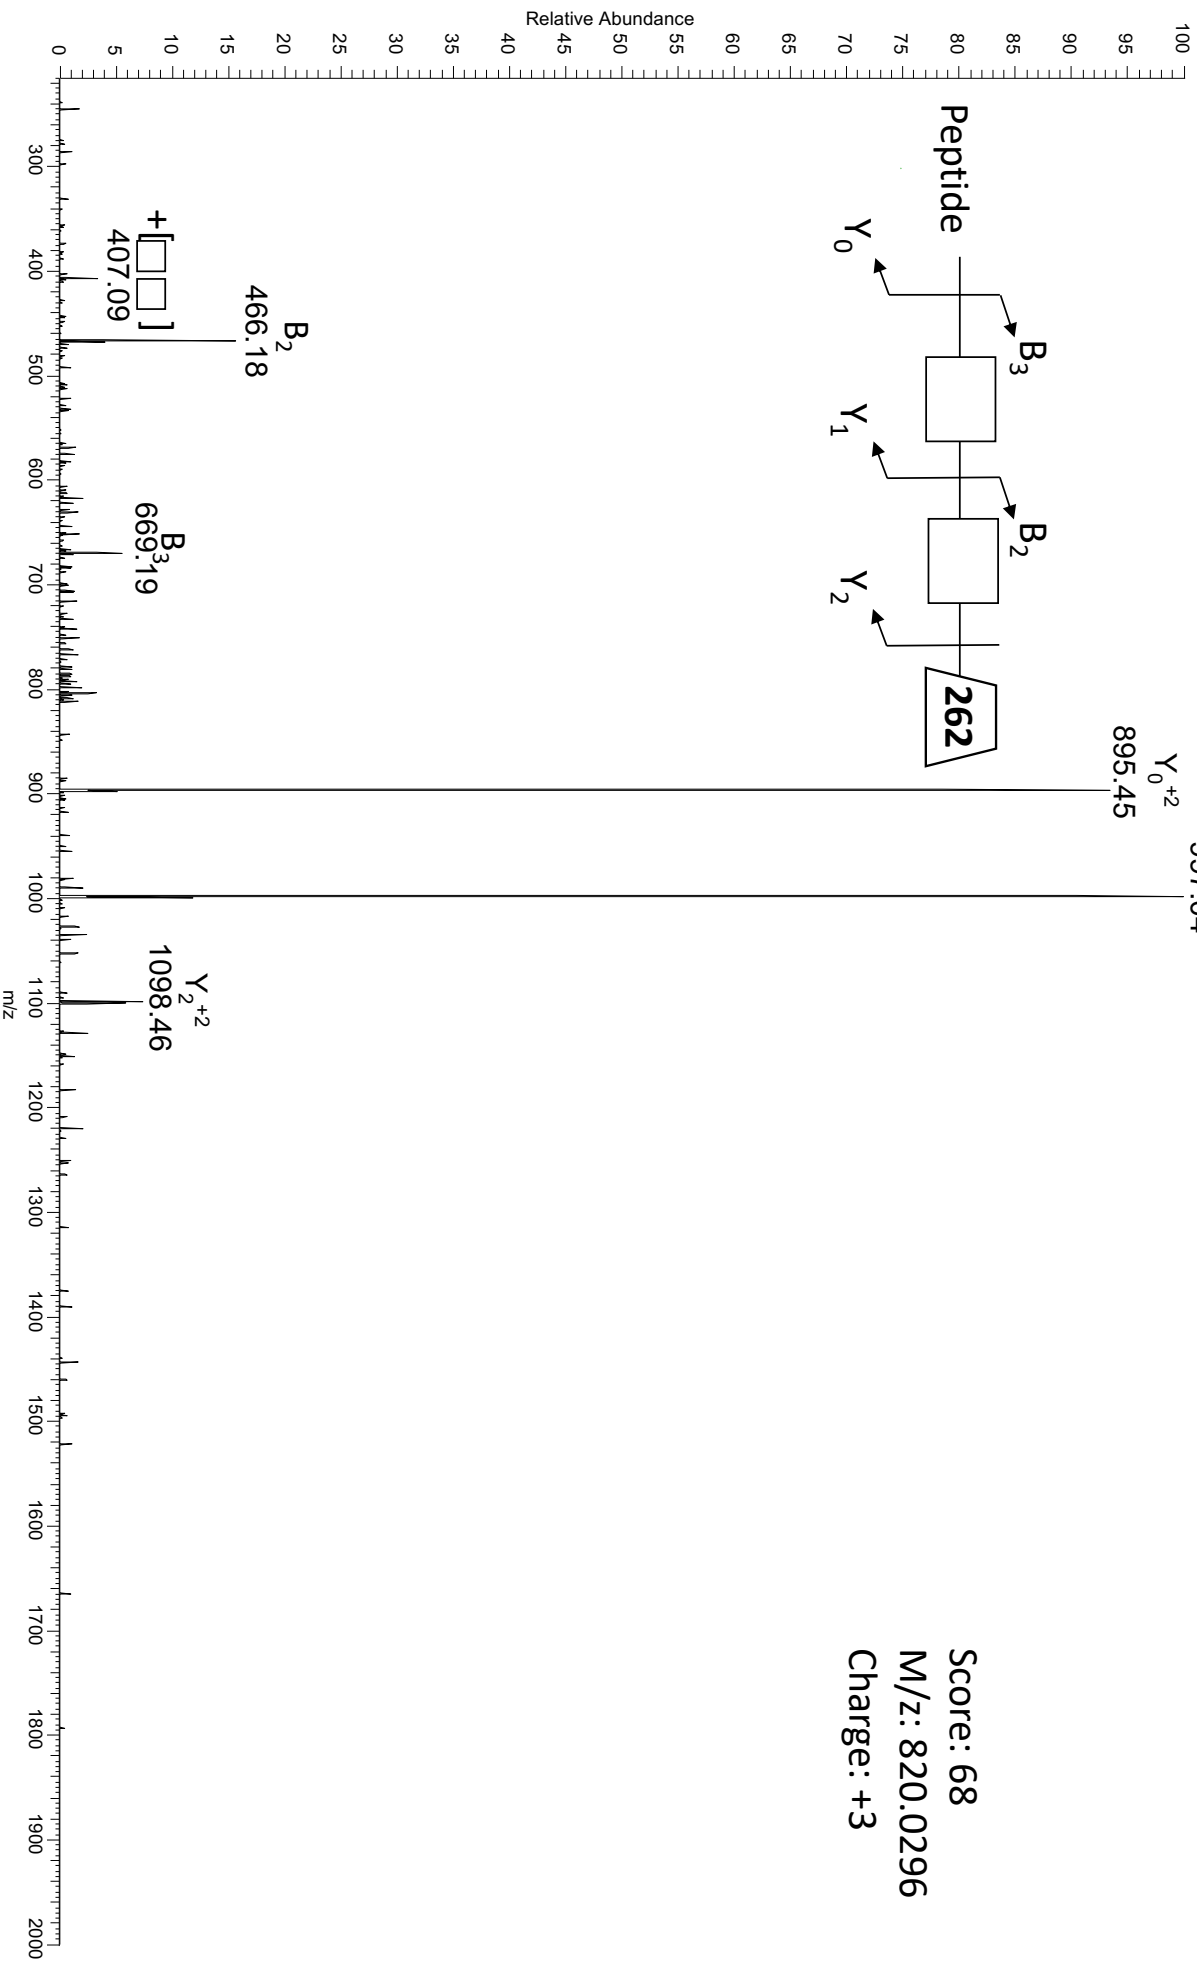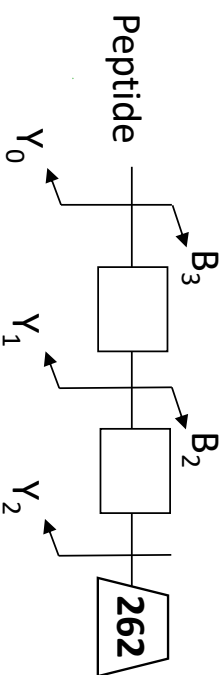

Score: 68  
M/z: 820.0296  
Charge: +3

MASCOT assignment

- F y15
- N y14
- E y13
- H y12
- P y11
- Q y10
- M y9
- O y8
- F y7
- A y6
- A y5
- S y4
- A y3
- P y2
- S y1
- r
- a/b1
- a/b2
- a/b3
- a/b4
- a/b5
- a/b6
- a/b7
- a/b8
- a/b9
- a/b10
- a/b11
- a/b12
- a/b13
- a/b14
- a/b15

Score: 68  
M/z: 820.0296  
Charge: +3

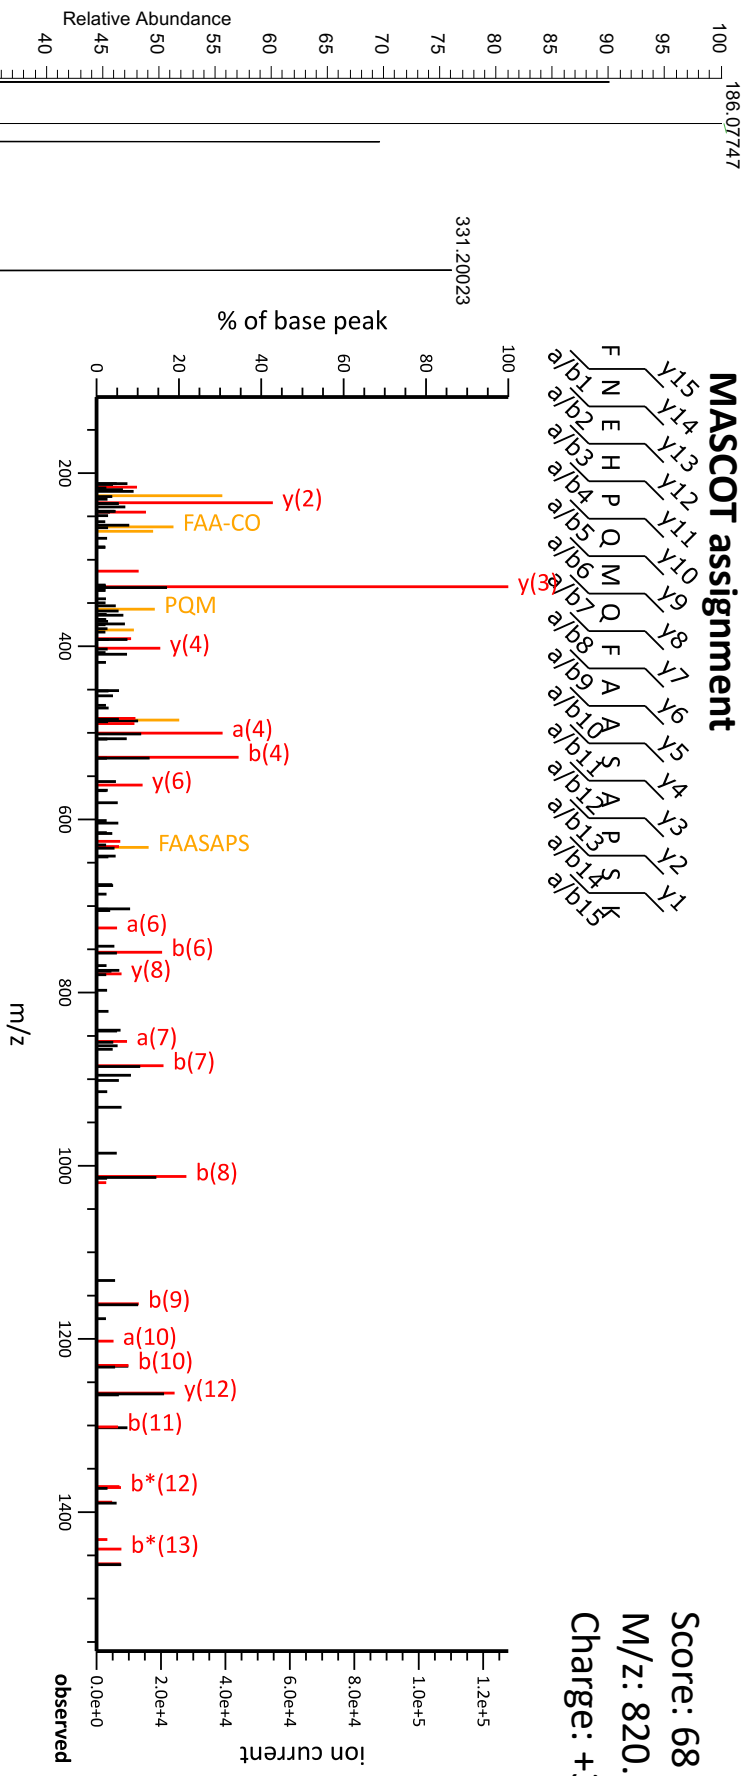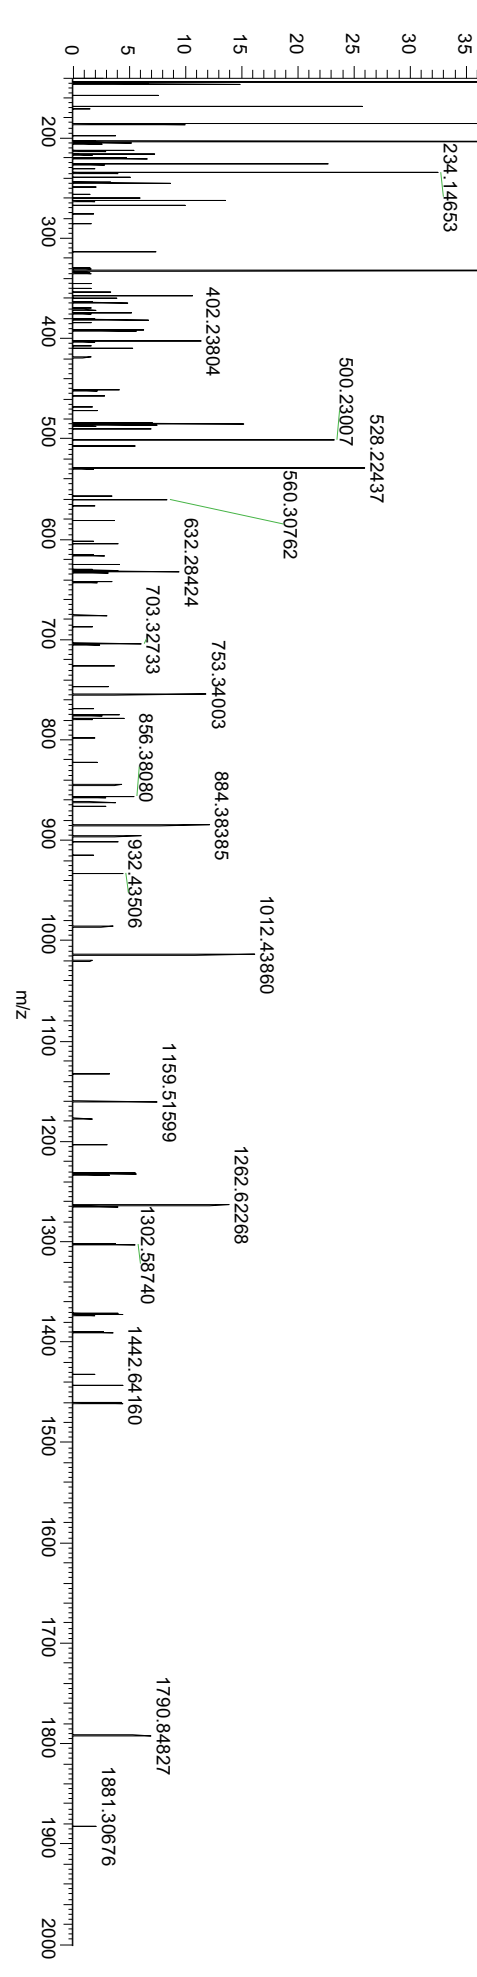

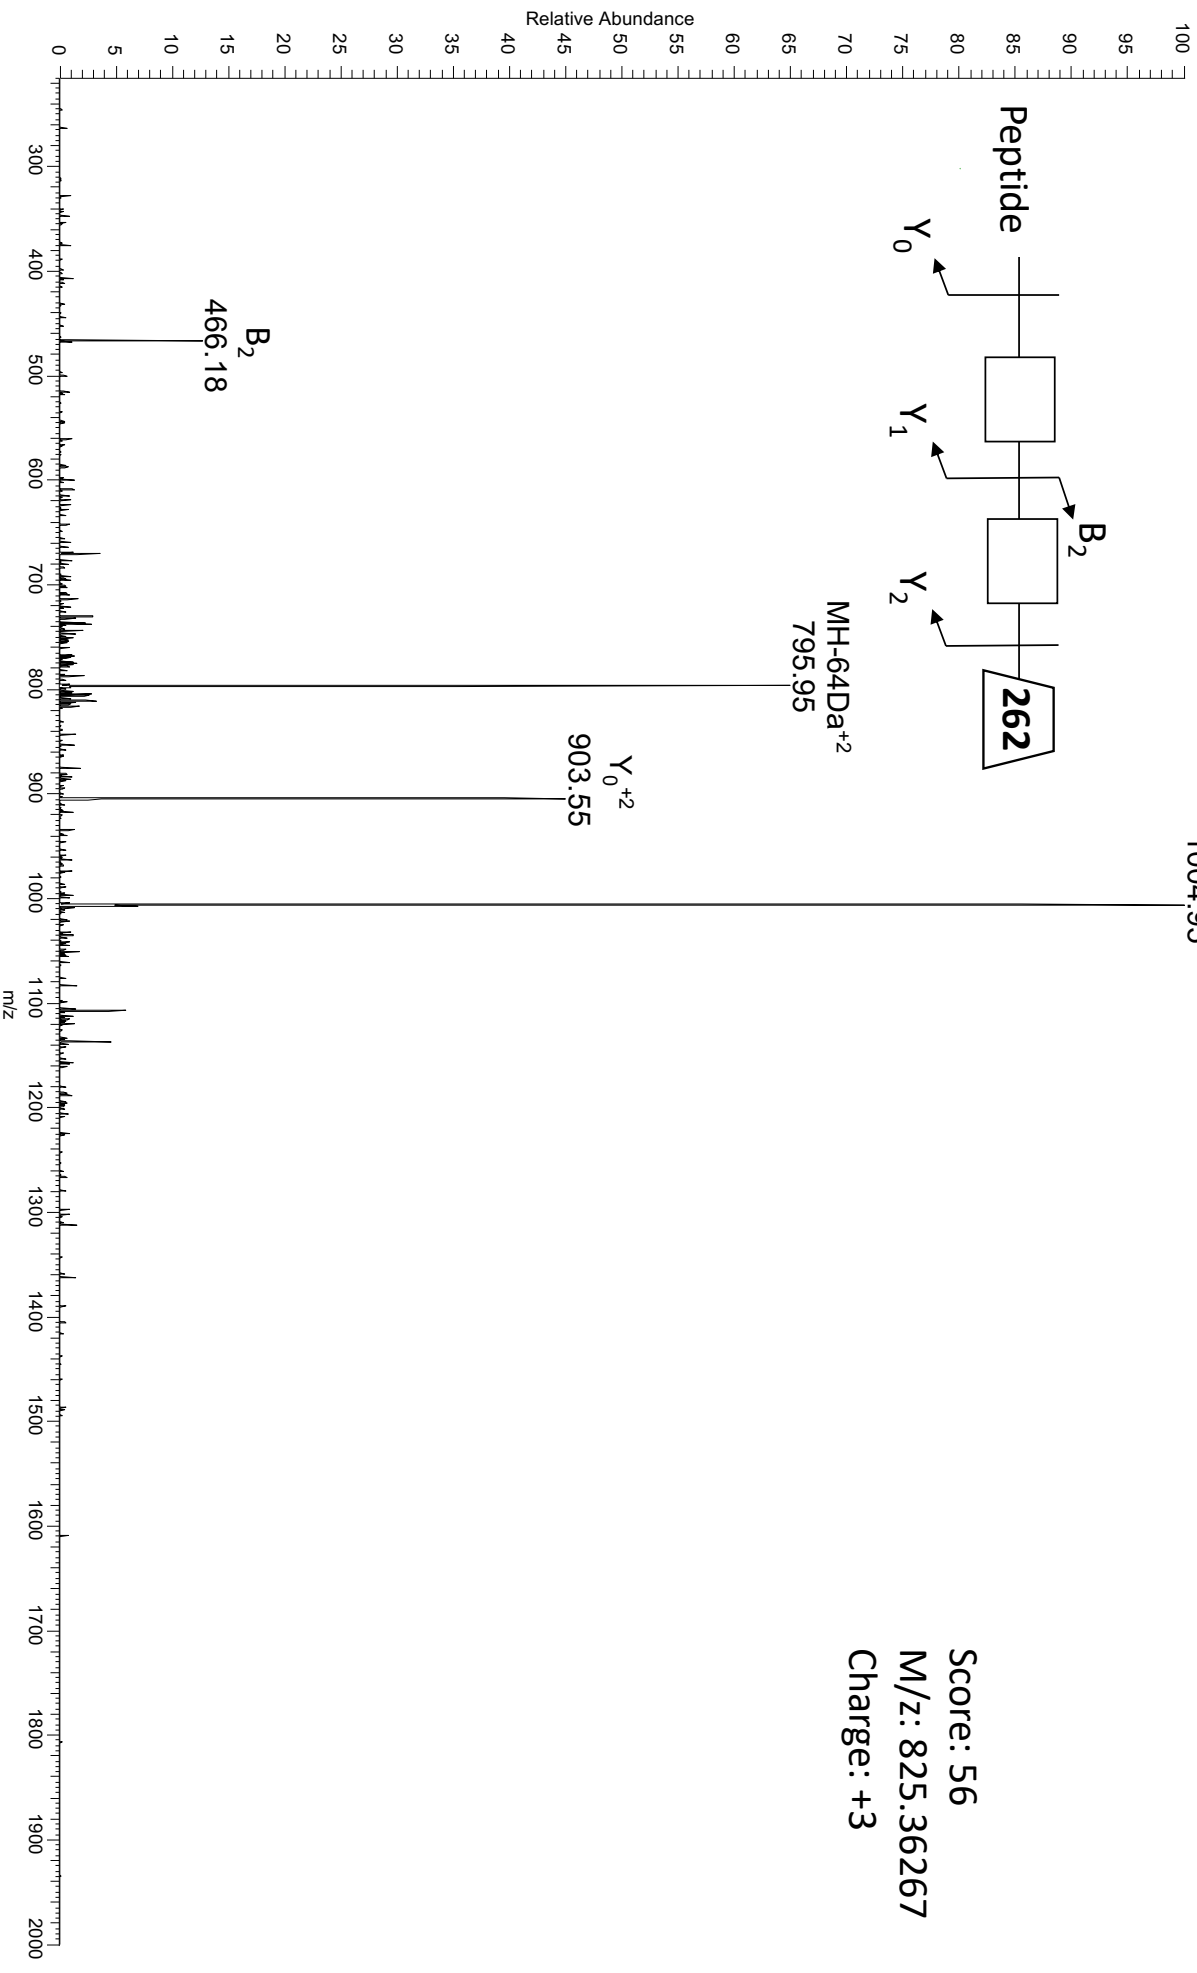

Score: 56  
M/z: 825.36267  
Charge: +3

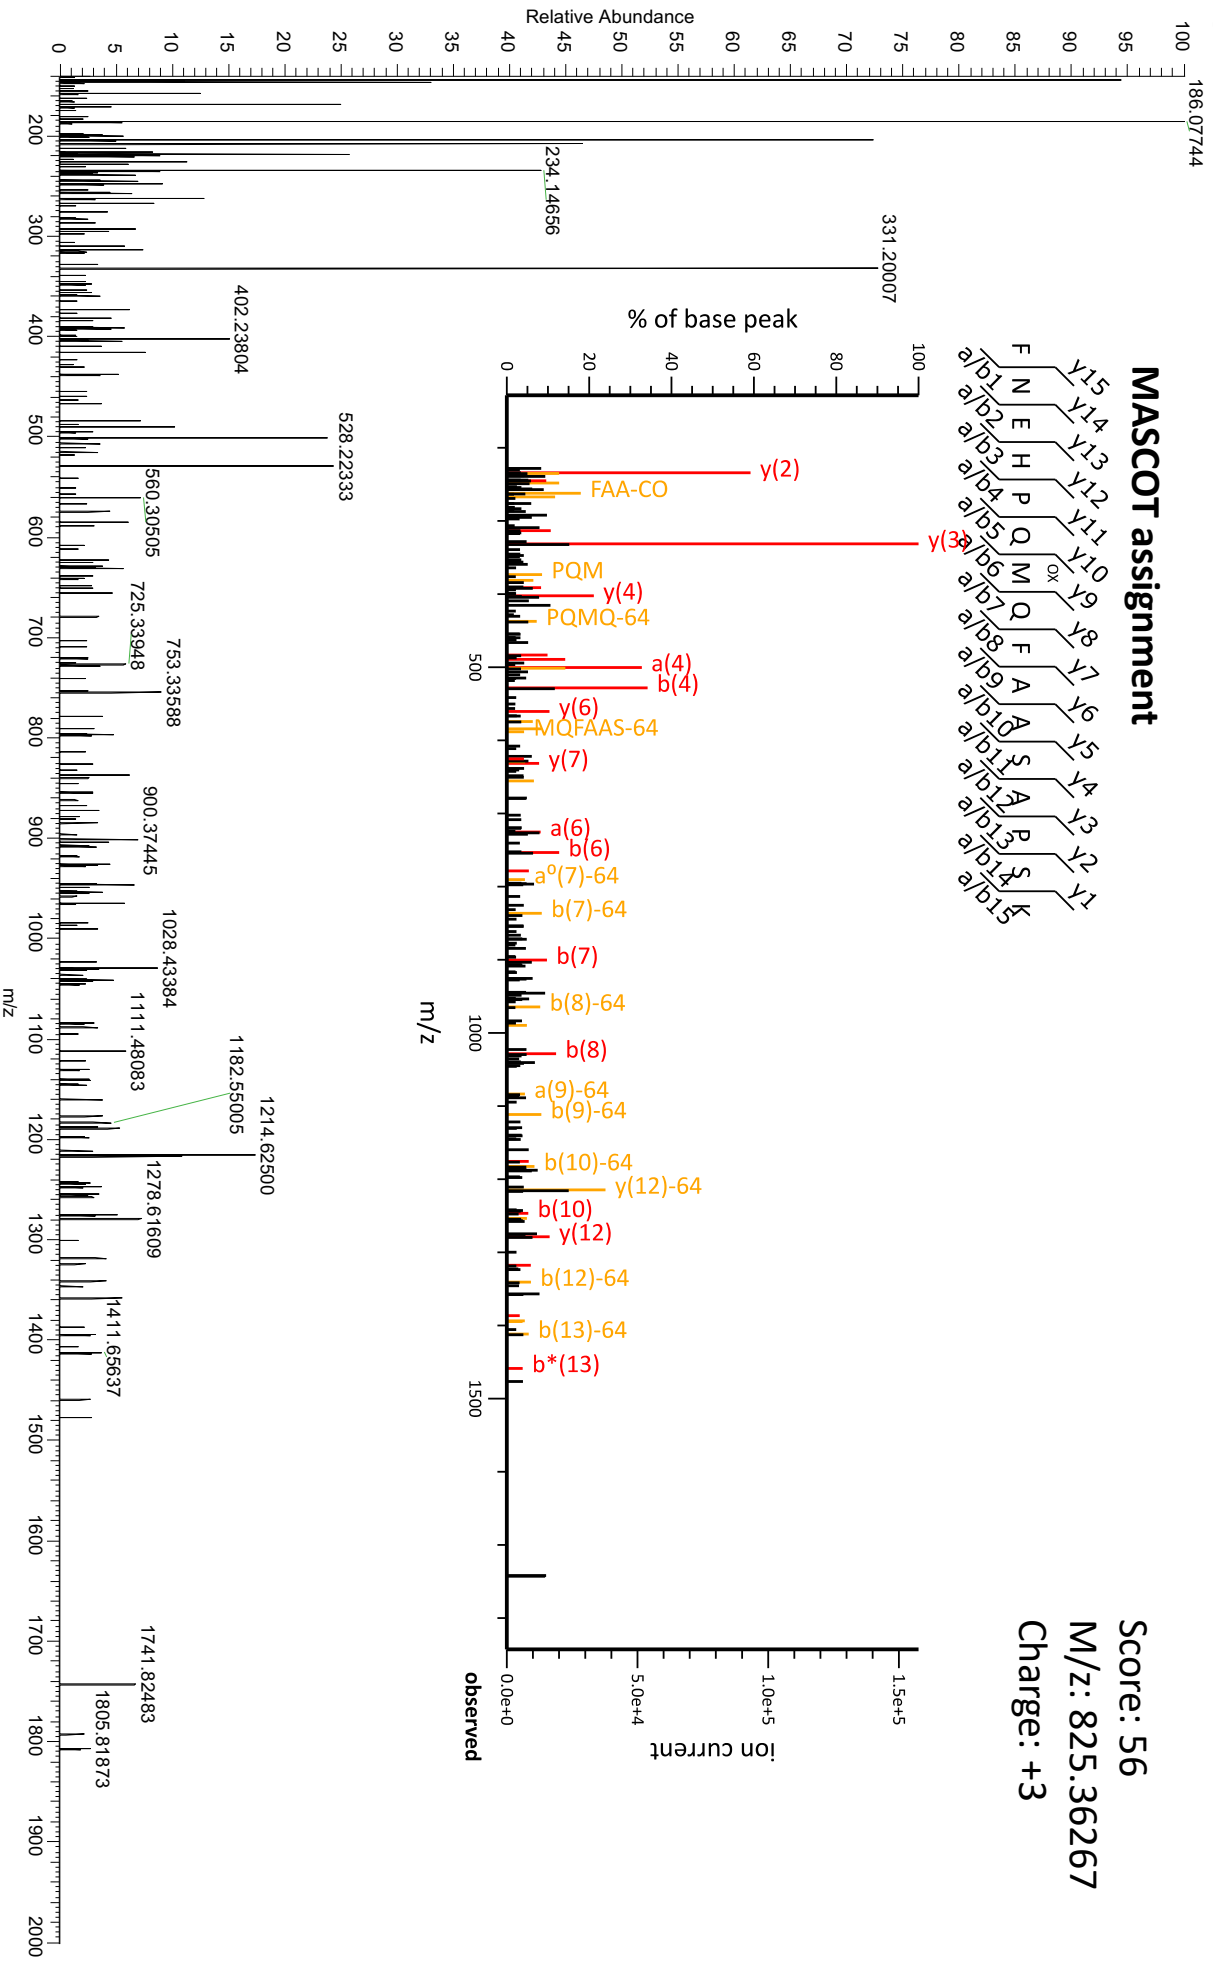

### MASCOT assignment

F N E H P Q M Q F A S T R K  
y15 y14 y13 y12 y11 y10 y9 y8 y7 y6 y5 y4 y3 y2 y1  
b15 b14 b13 b12 b11 b10 b9 b8 b7 b6 b5 b4 b3 b2 b1

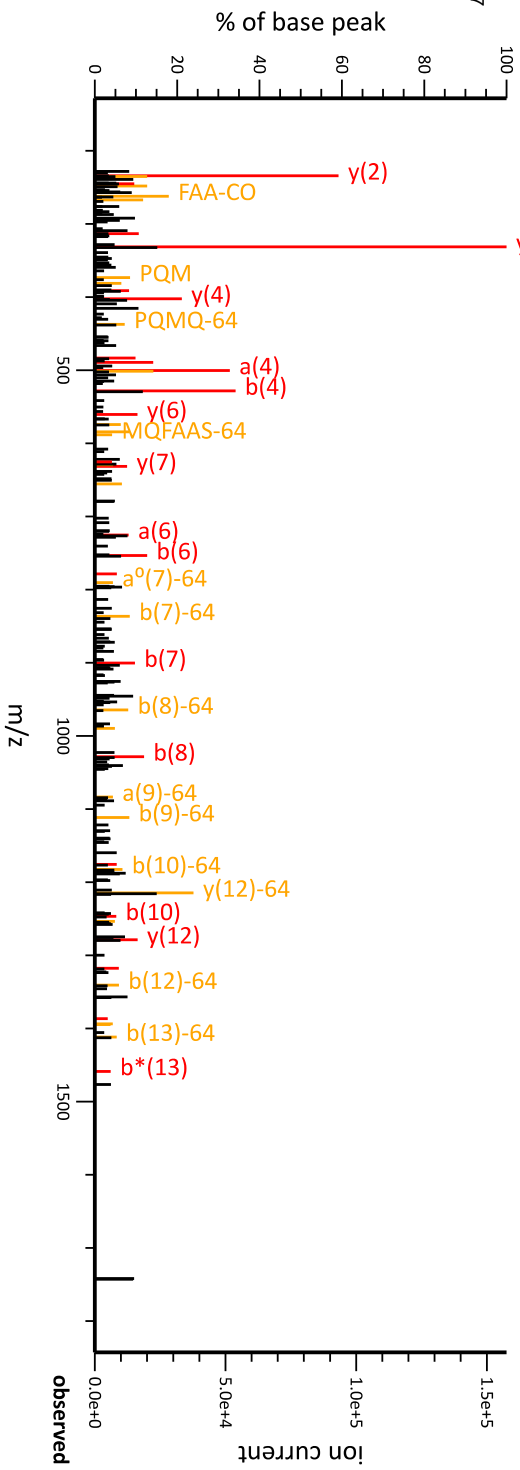

Score: 56

M/z: 825.36267

Charge: +3

ITMS-CID

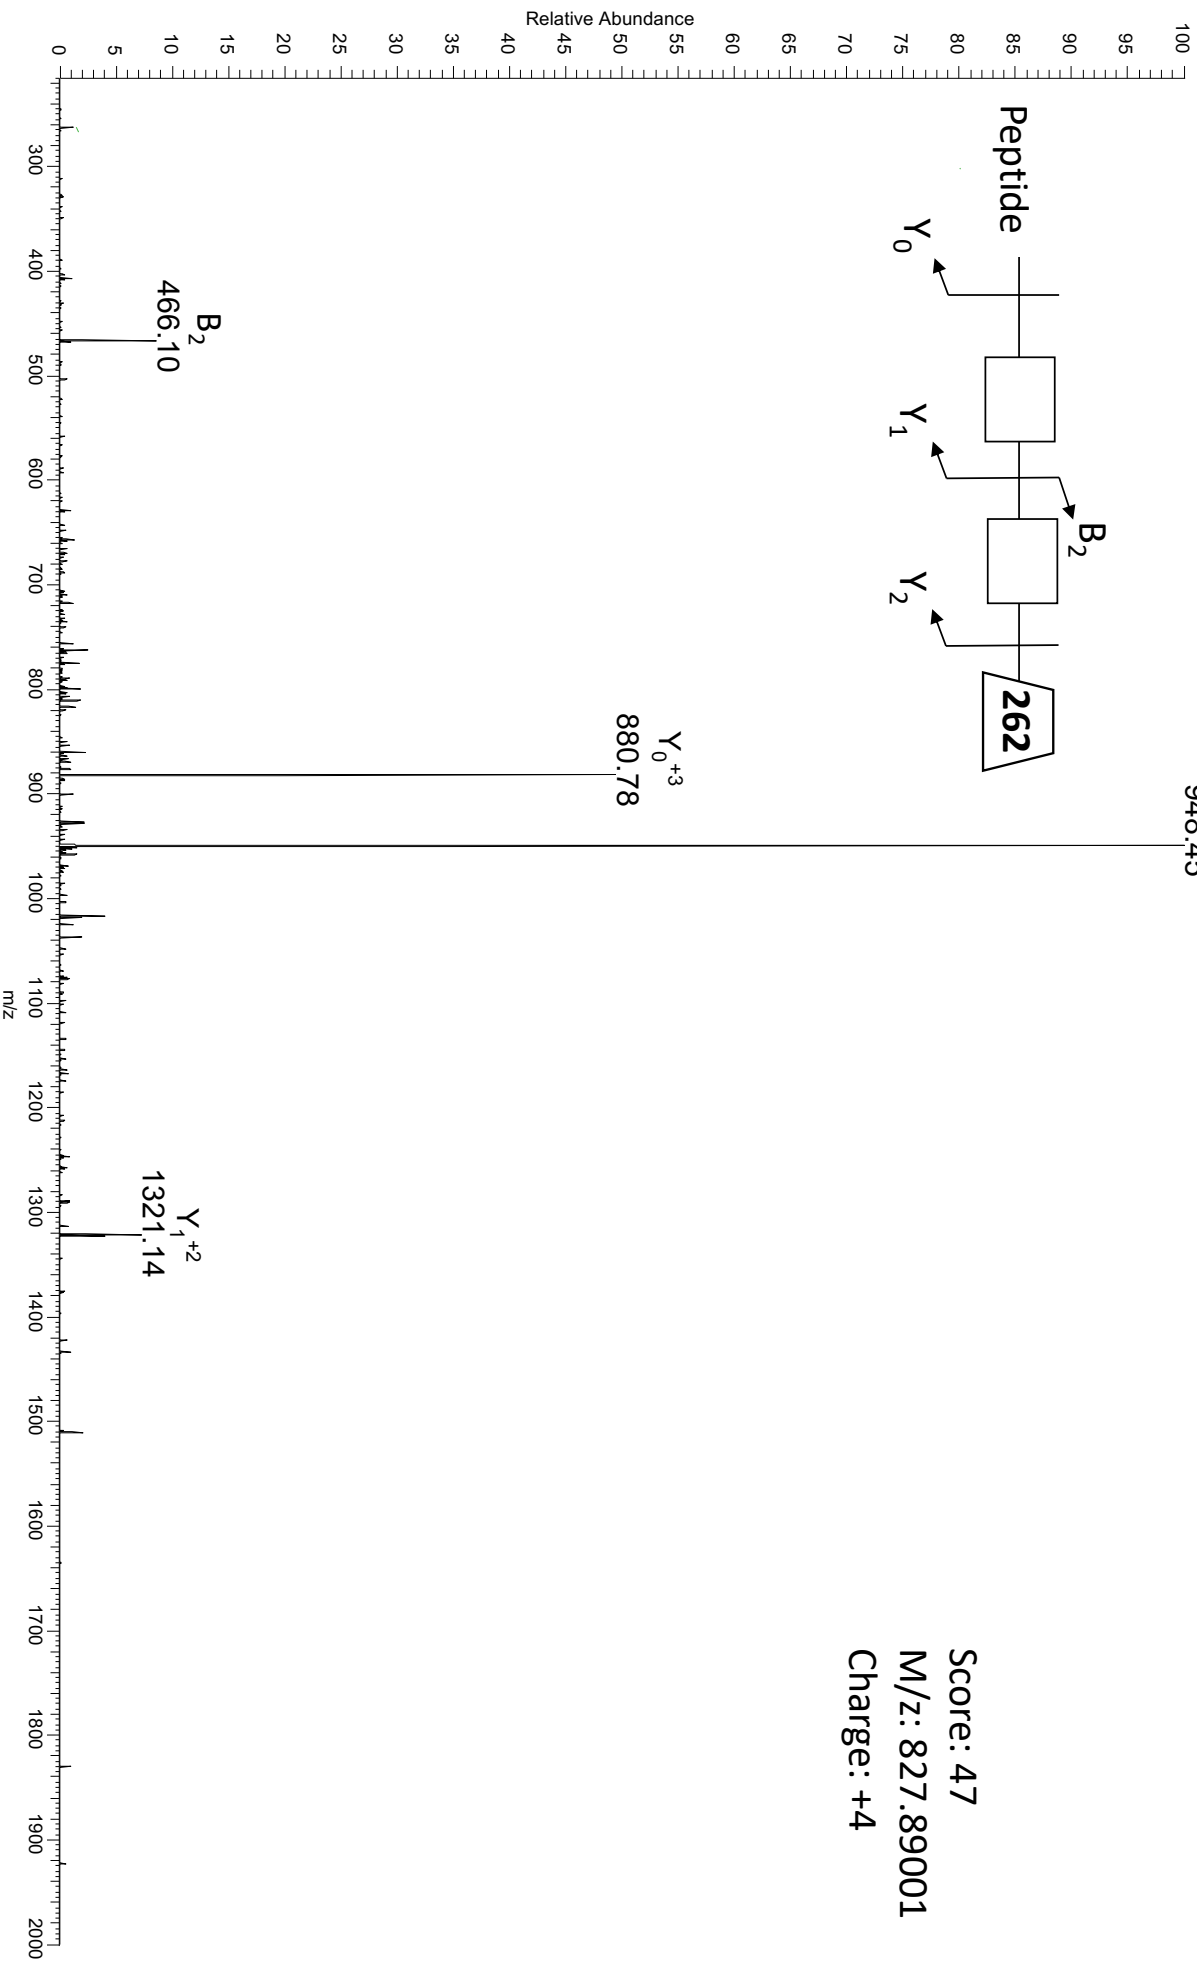

Score: 47  
M/z: 827.89001  
Charge: +4

MASCOT assignment

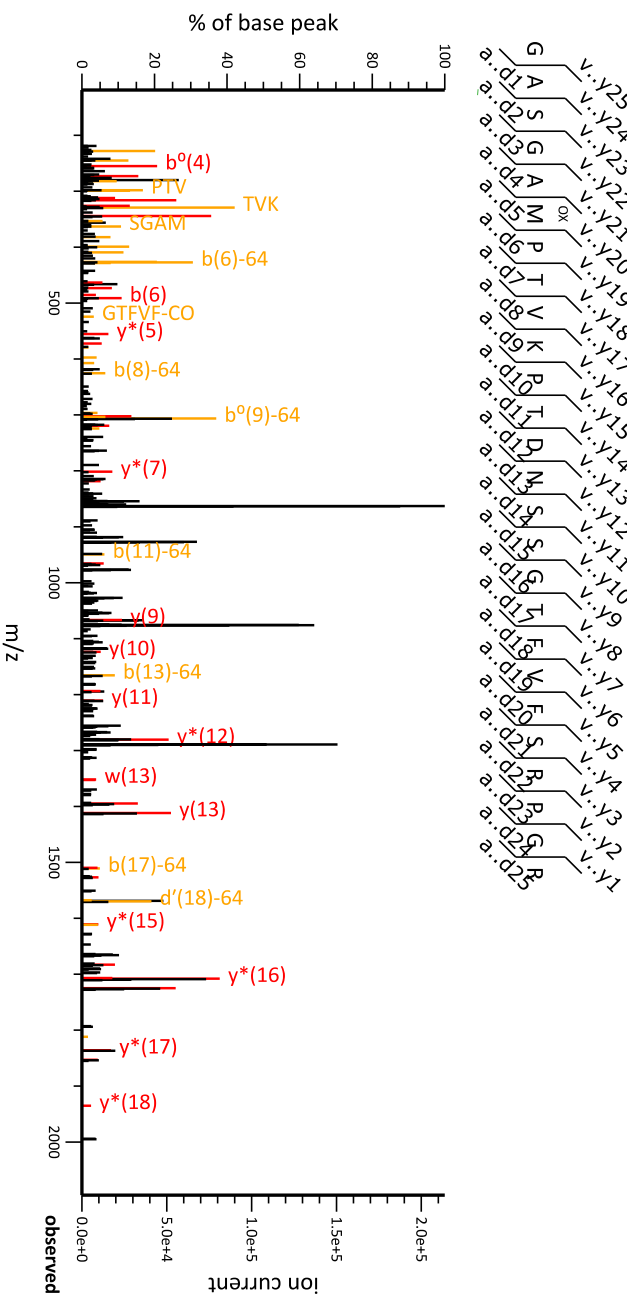

Score: 47

M/z: 827.89001

Charge: +4

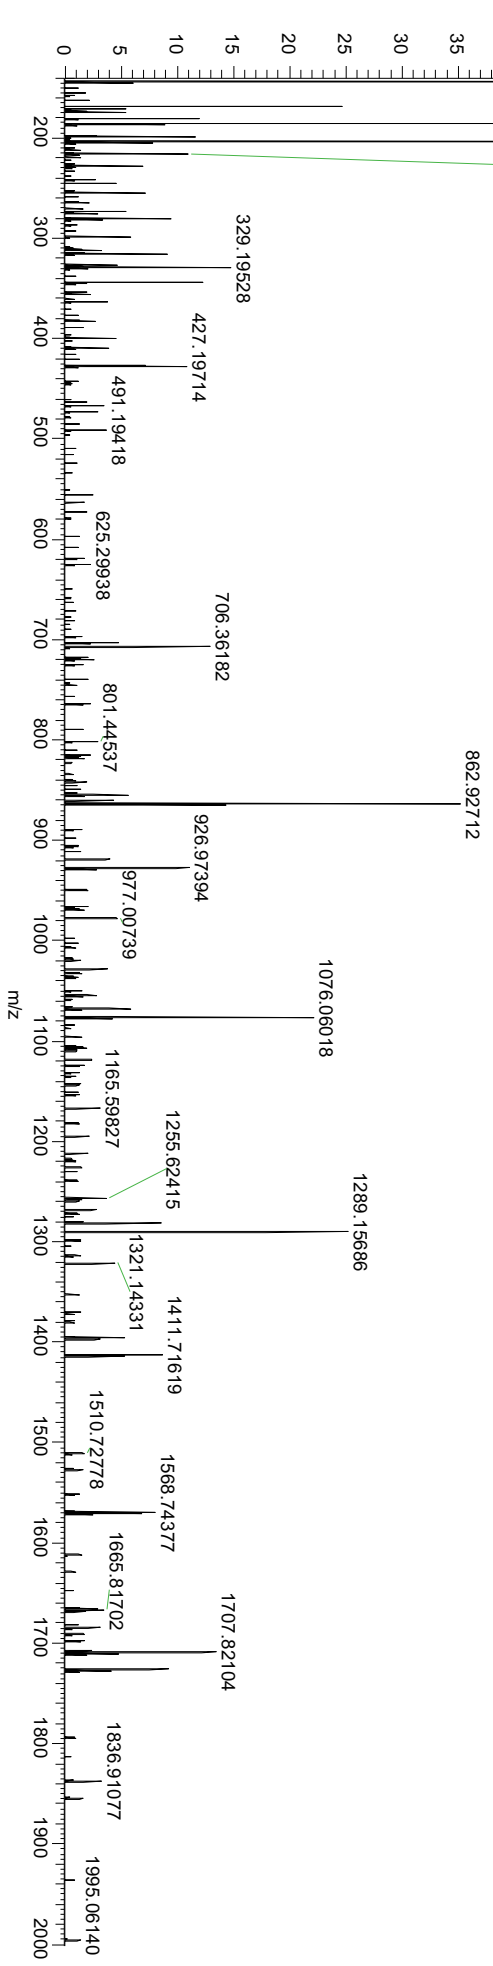



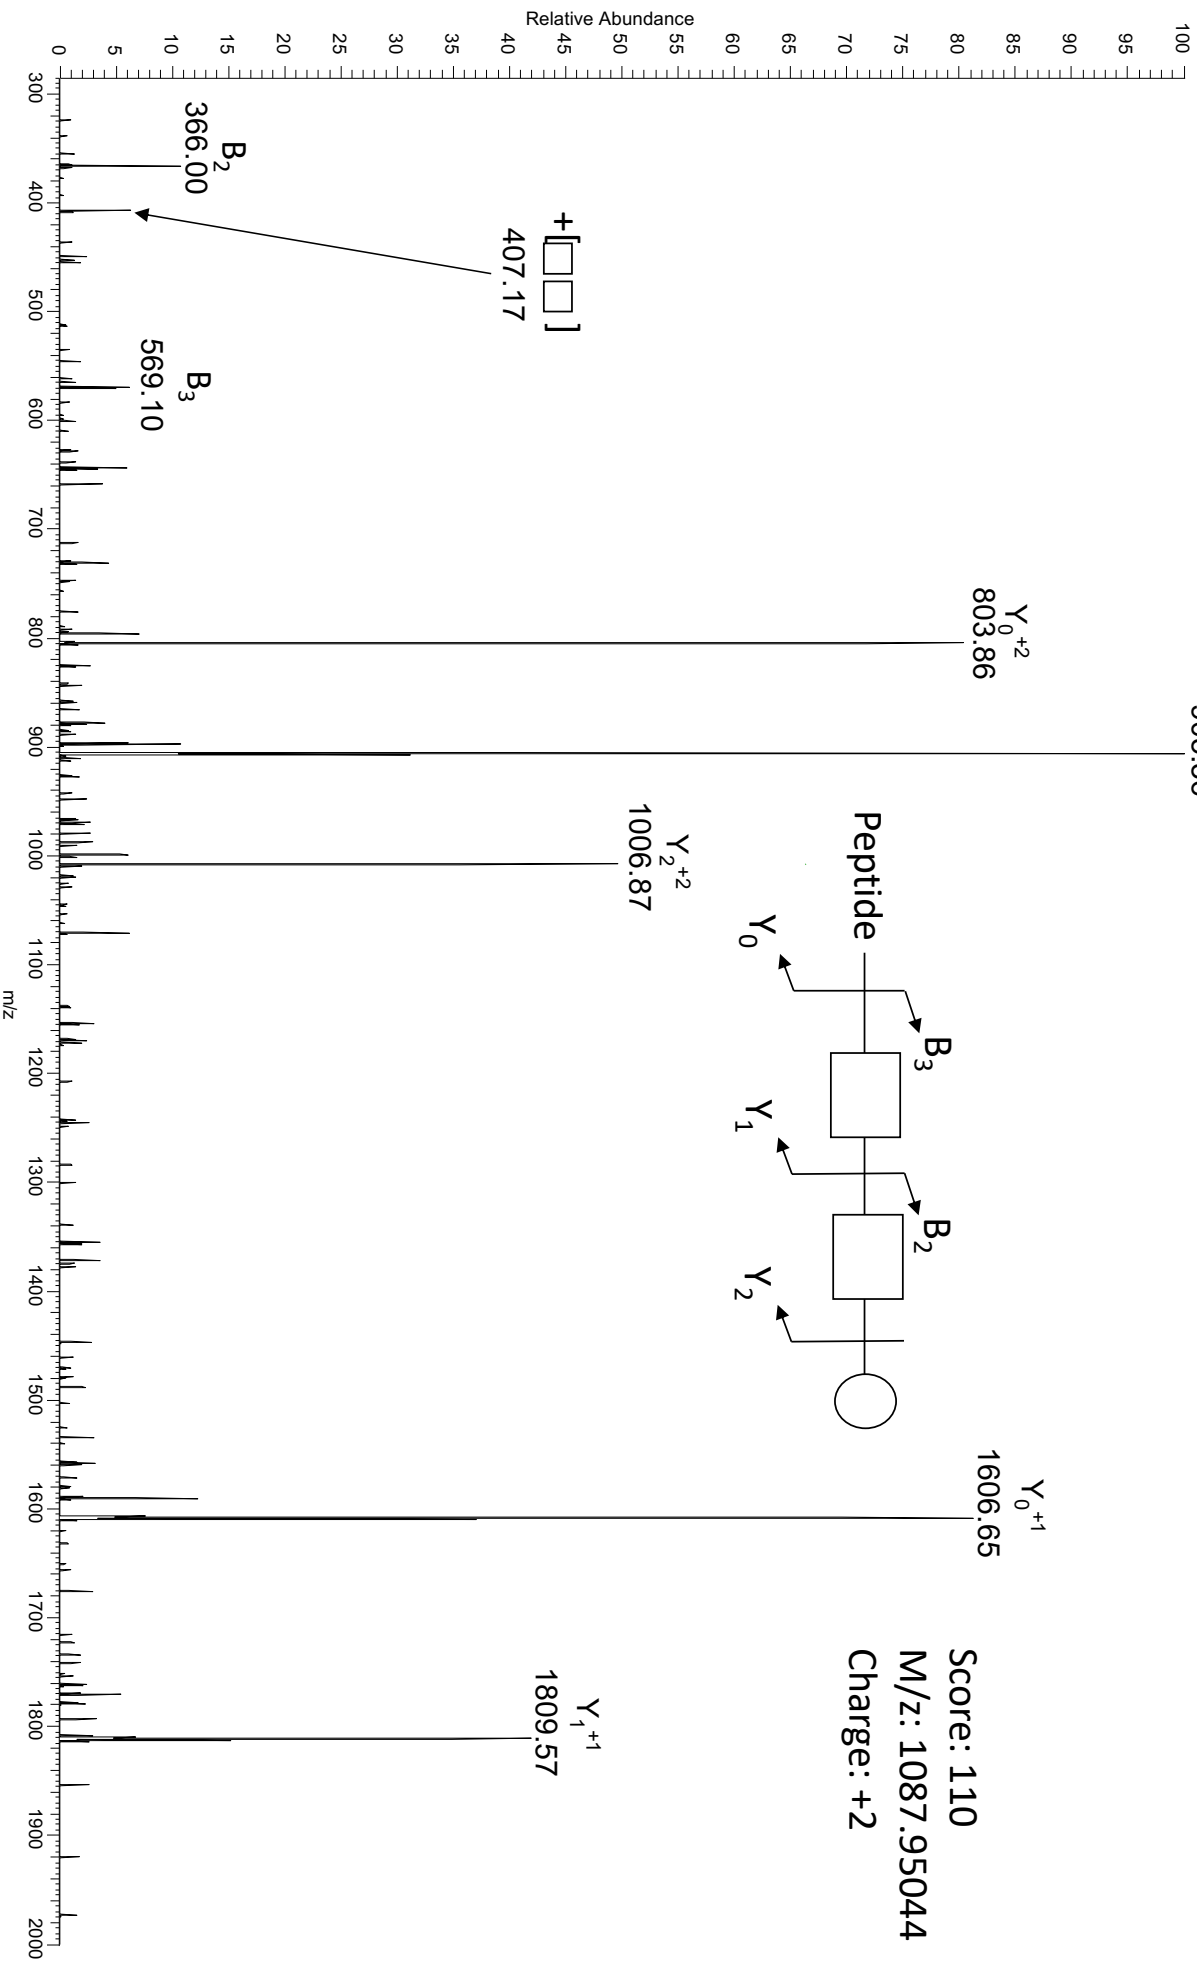

MASCOT assignment

H y15  
D y14  
A y13  
M y12  
G y11  
M y10  
S y9  
P y8  
A y7  
A y6  
S y5  
P y4  
A y3  
M y2  
S y1  
F y0

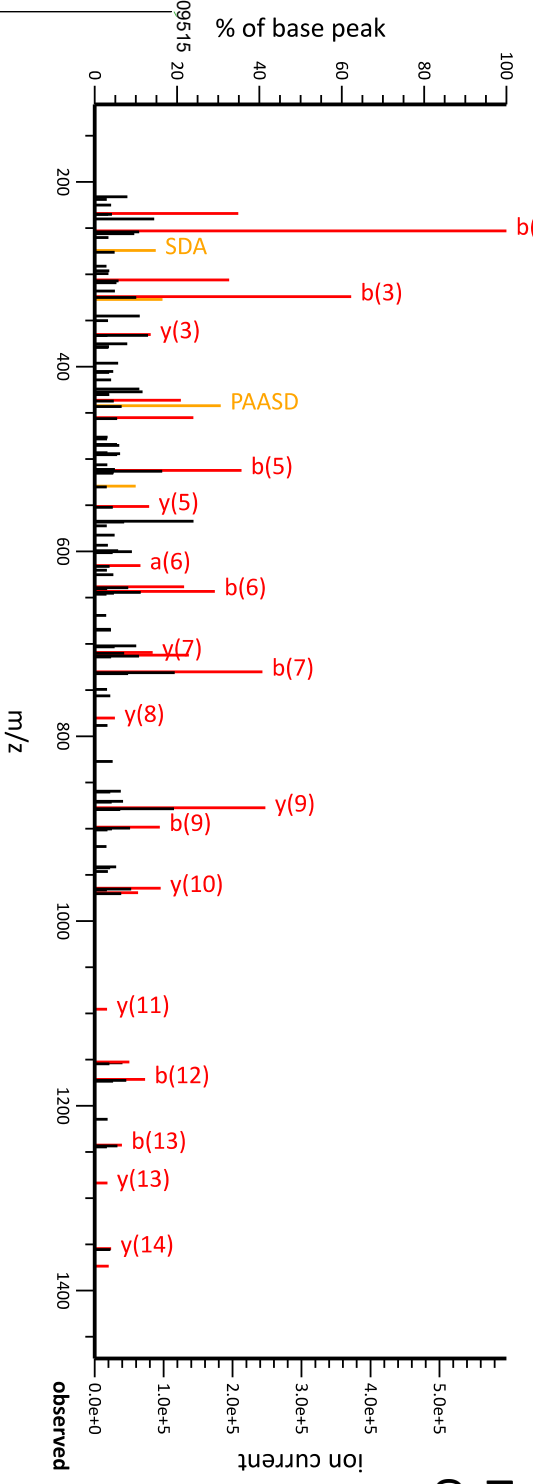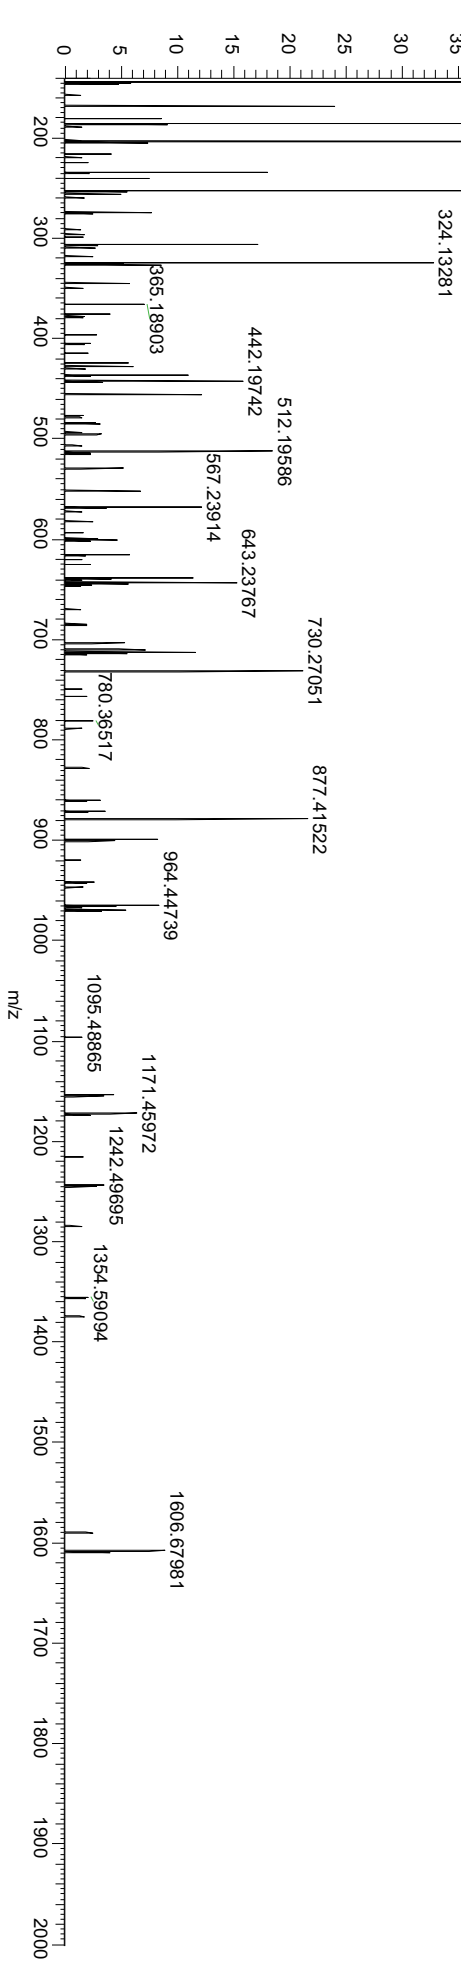

Score: 110

M/z: 1087.95044

Charge: +2

ITMS-CID

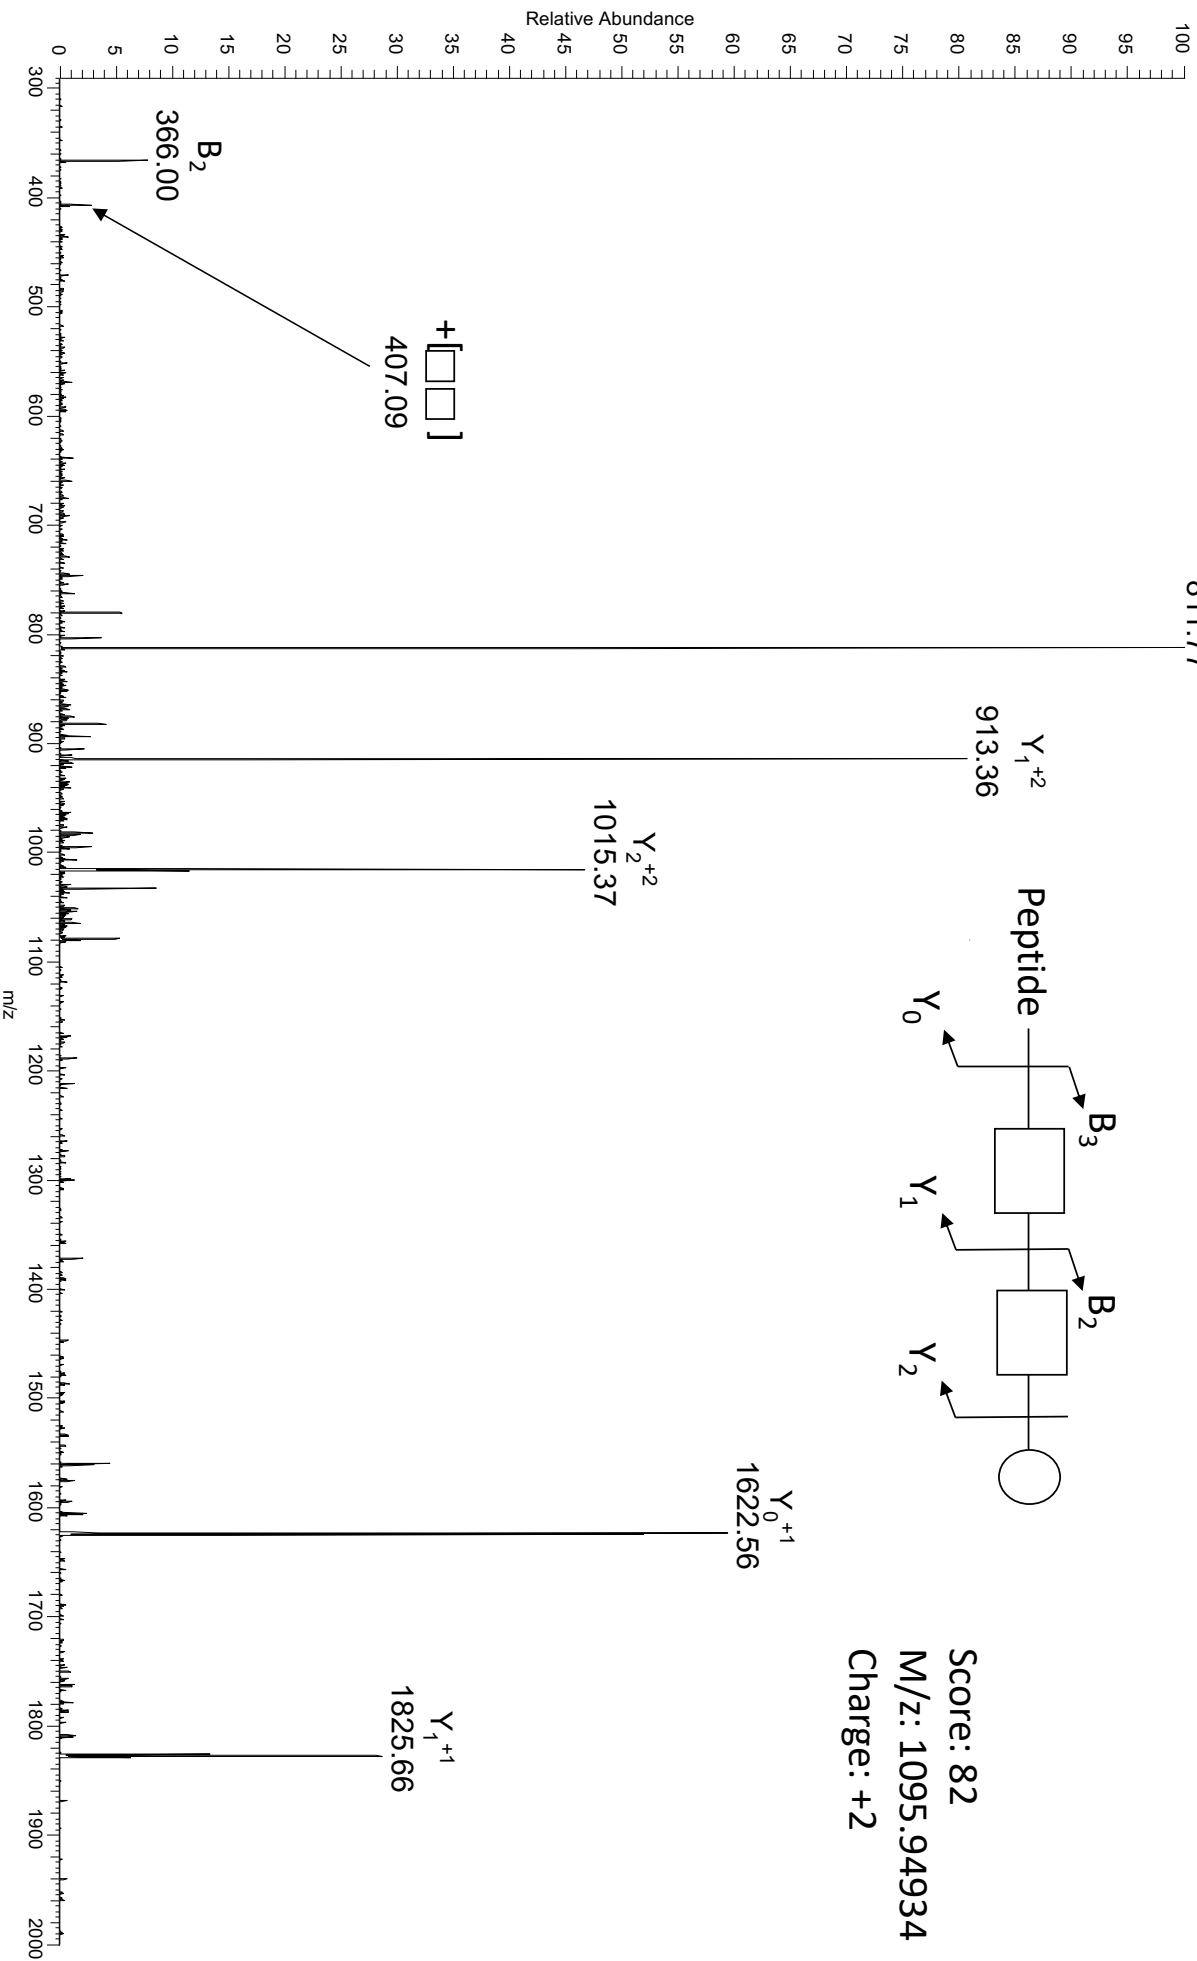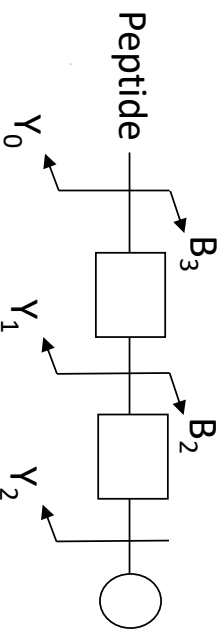

Score: 82  
M/z: 1095.94934  
Charge: +2

186.07767

### MASCOT assignment

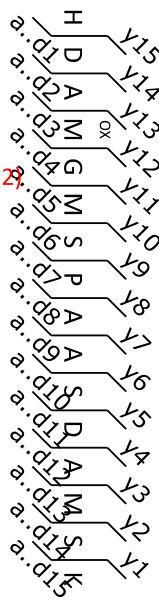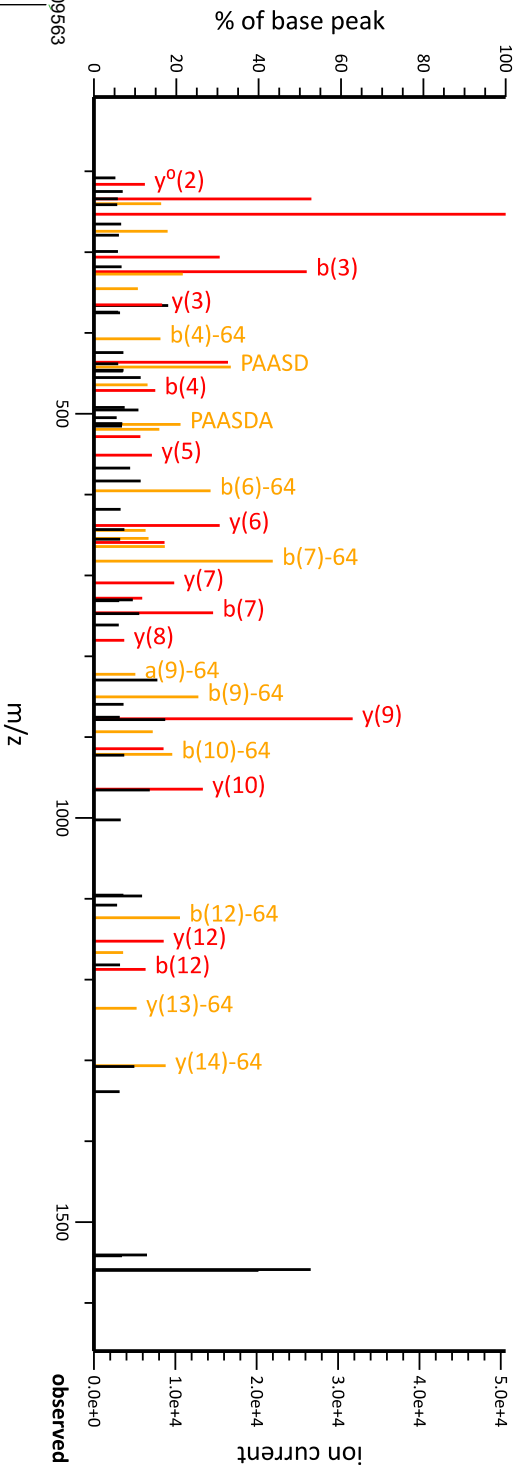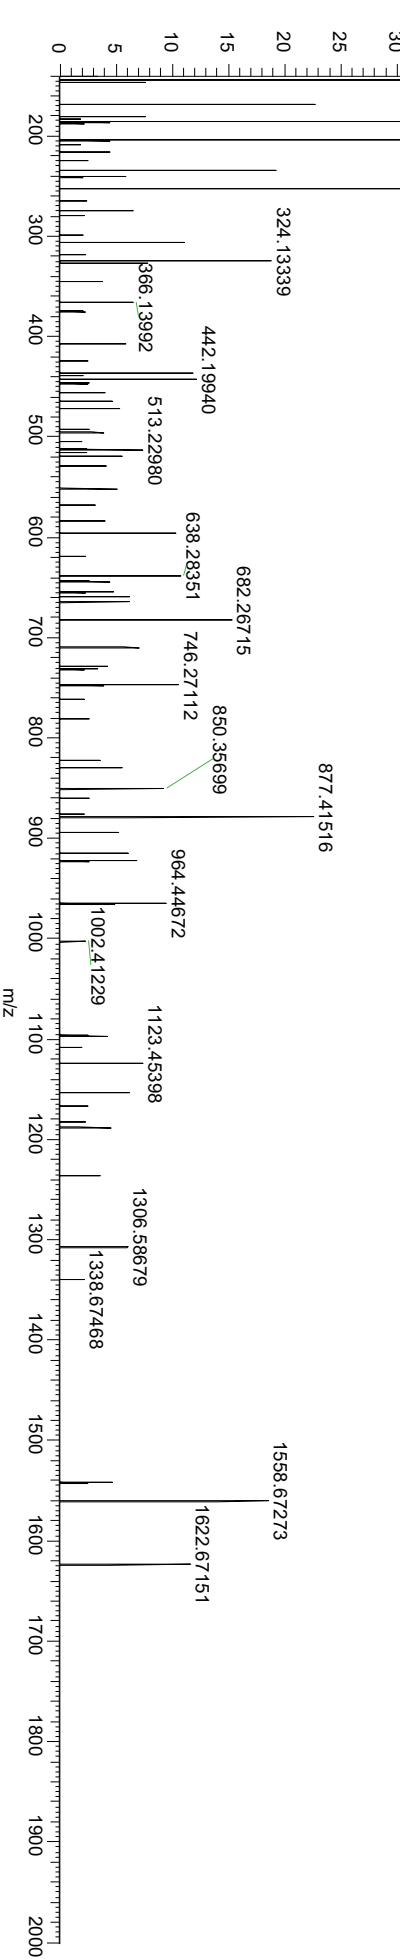

Score: 82  
M/z: 1095.94934  
Charge: +2

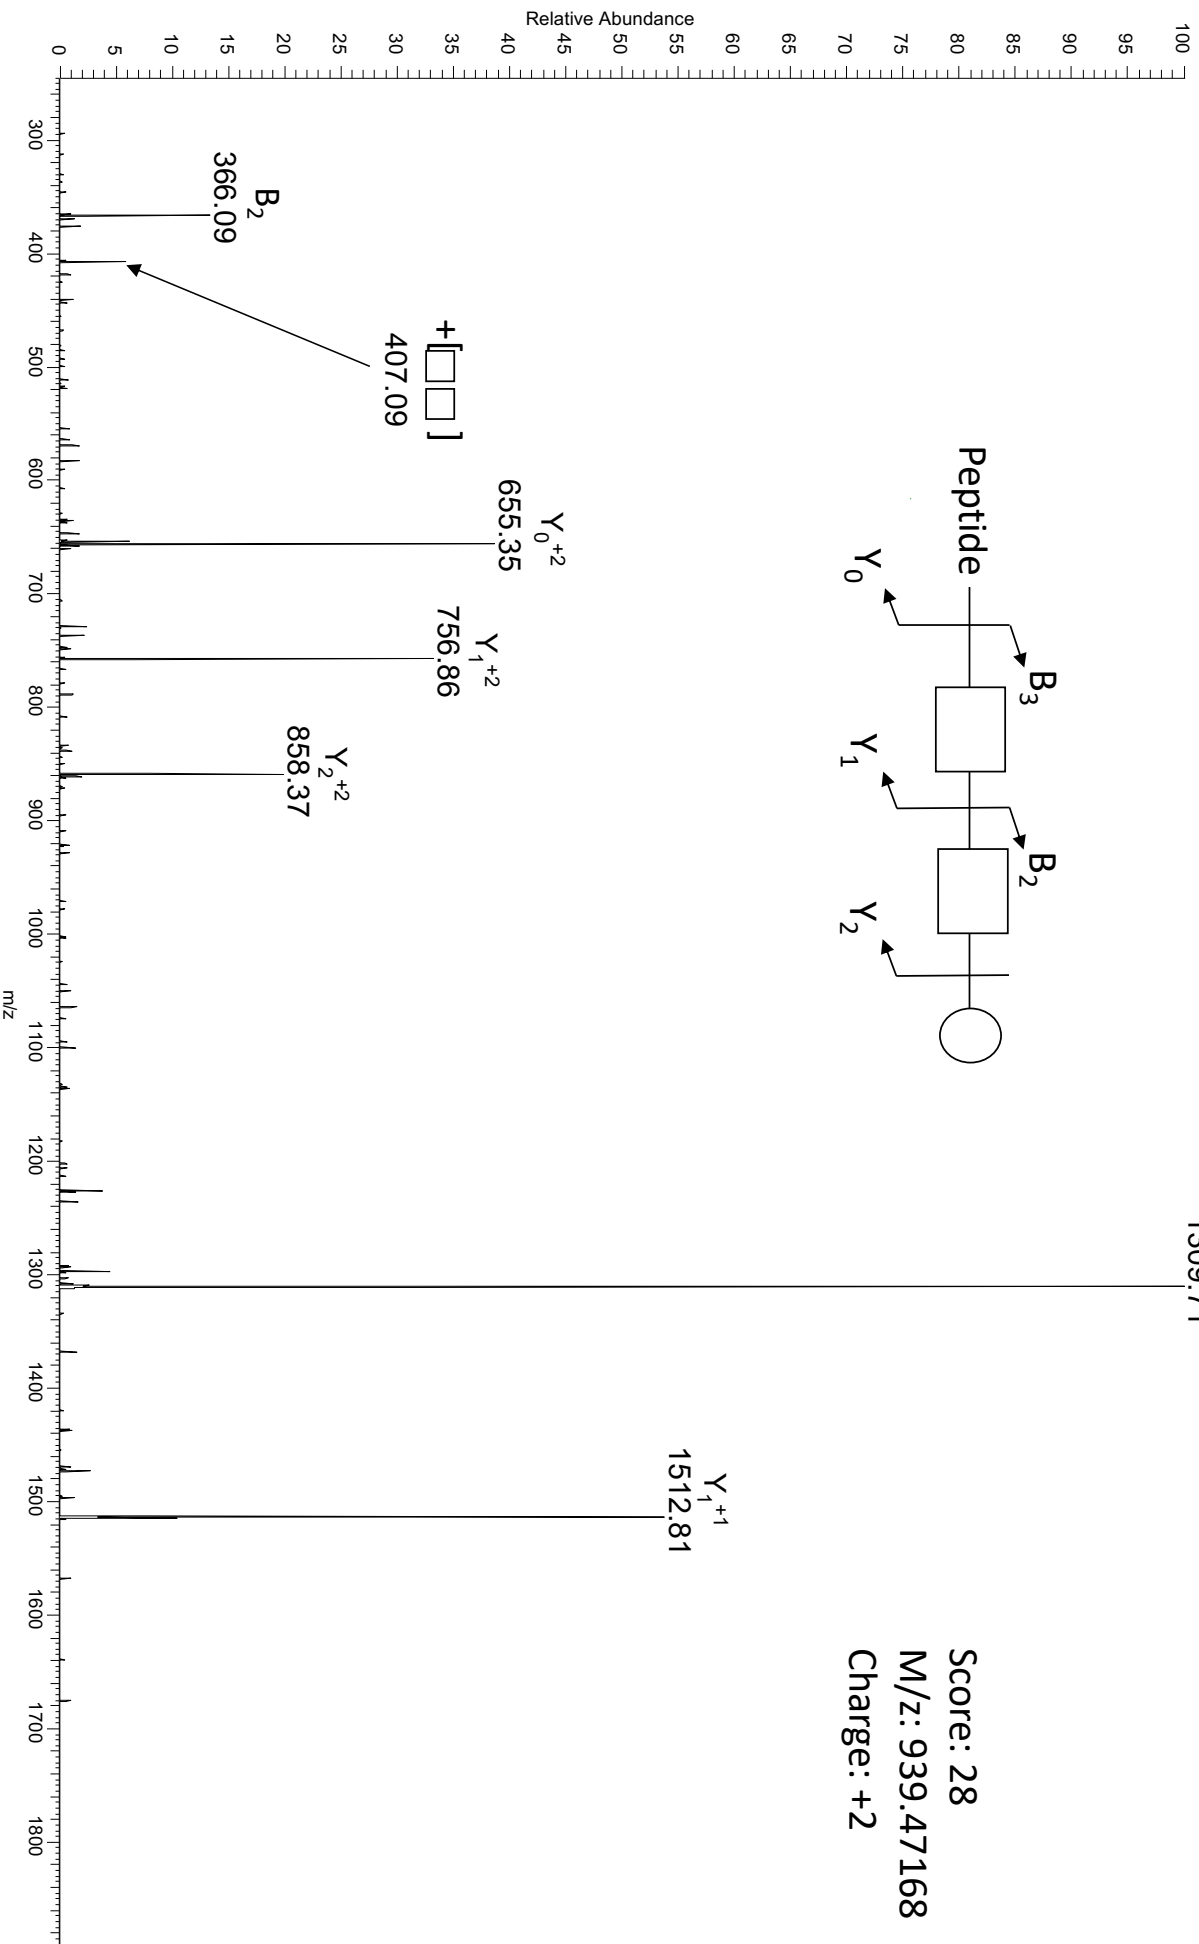

1310.72241

Score: 28  
M/z: 939.47168  
Charge: +2

### MASCOT assignment

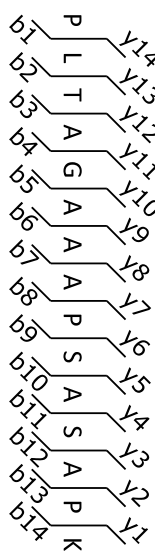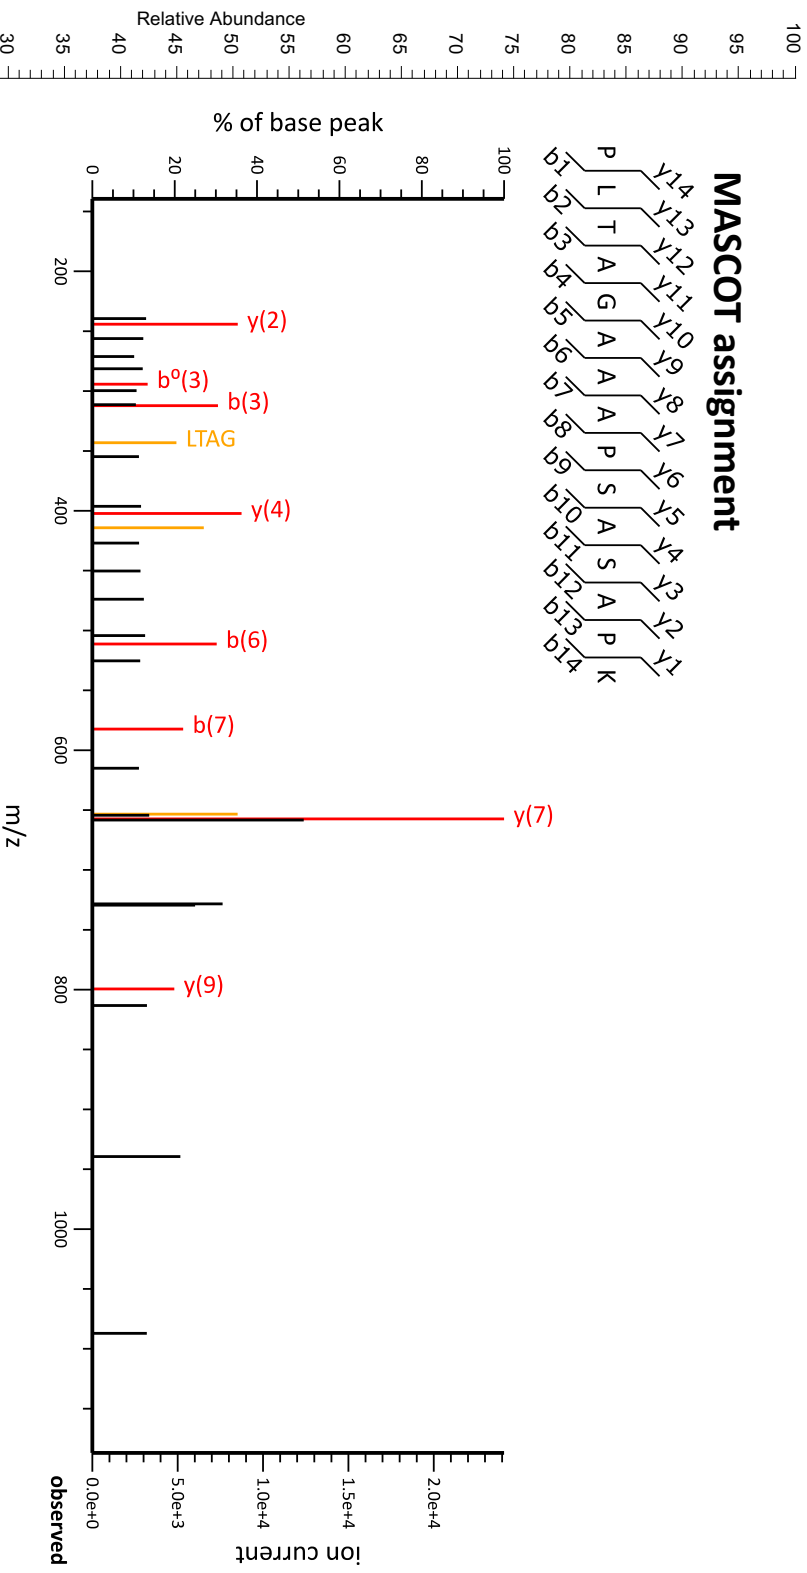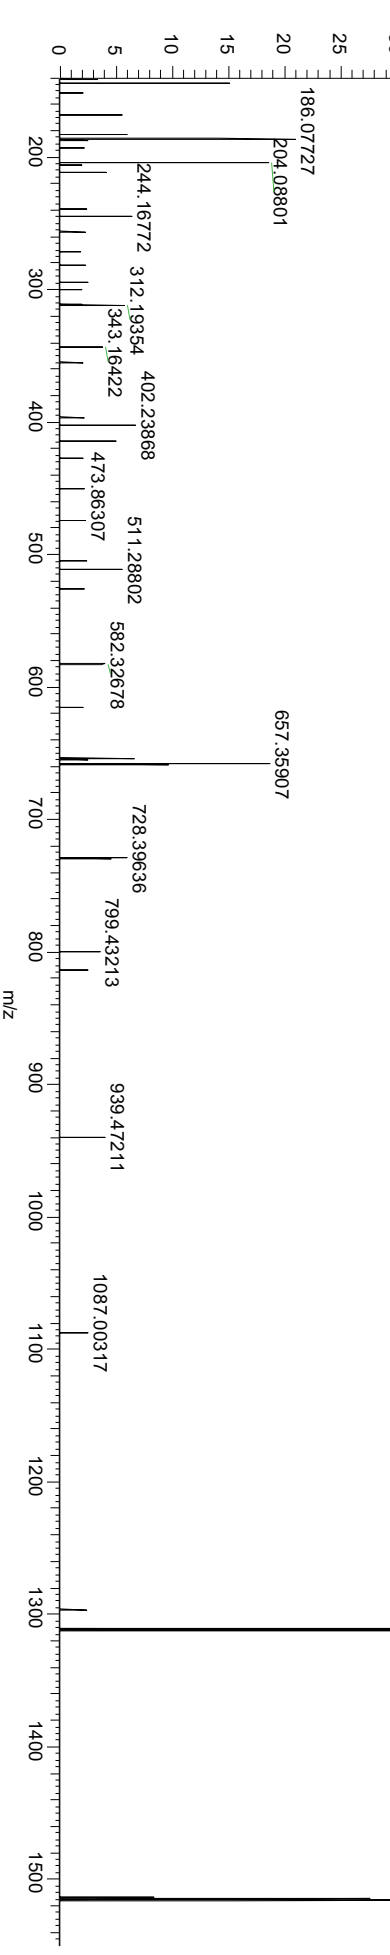

ITMS-CID

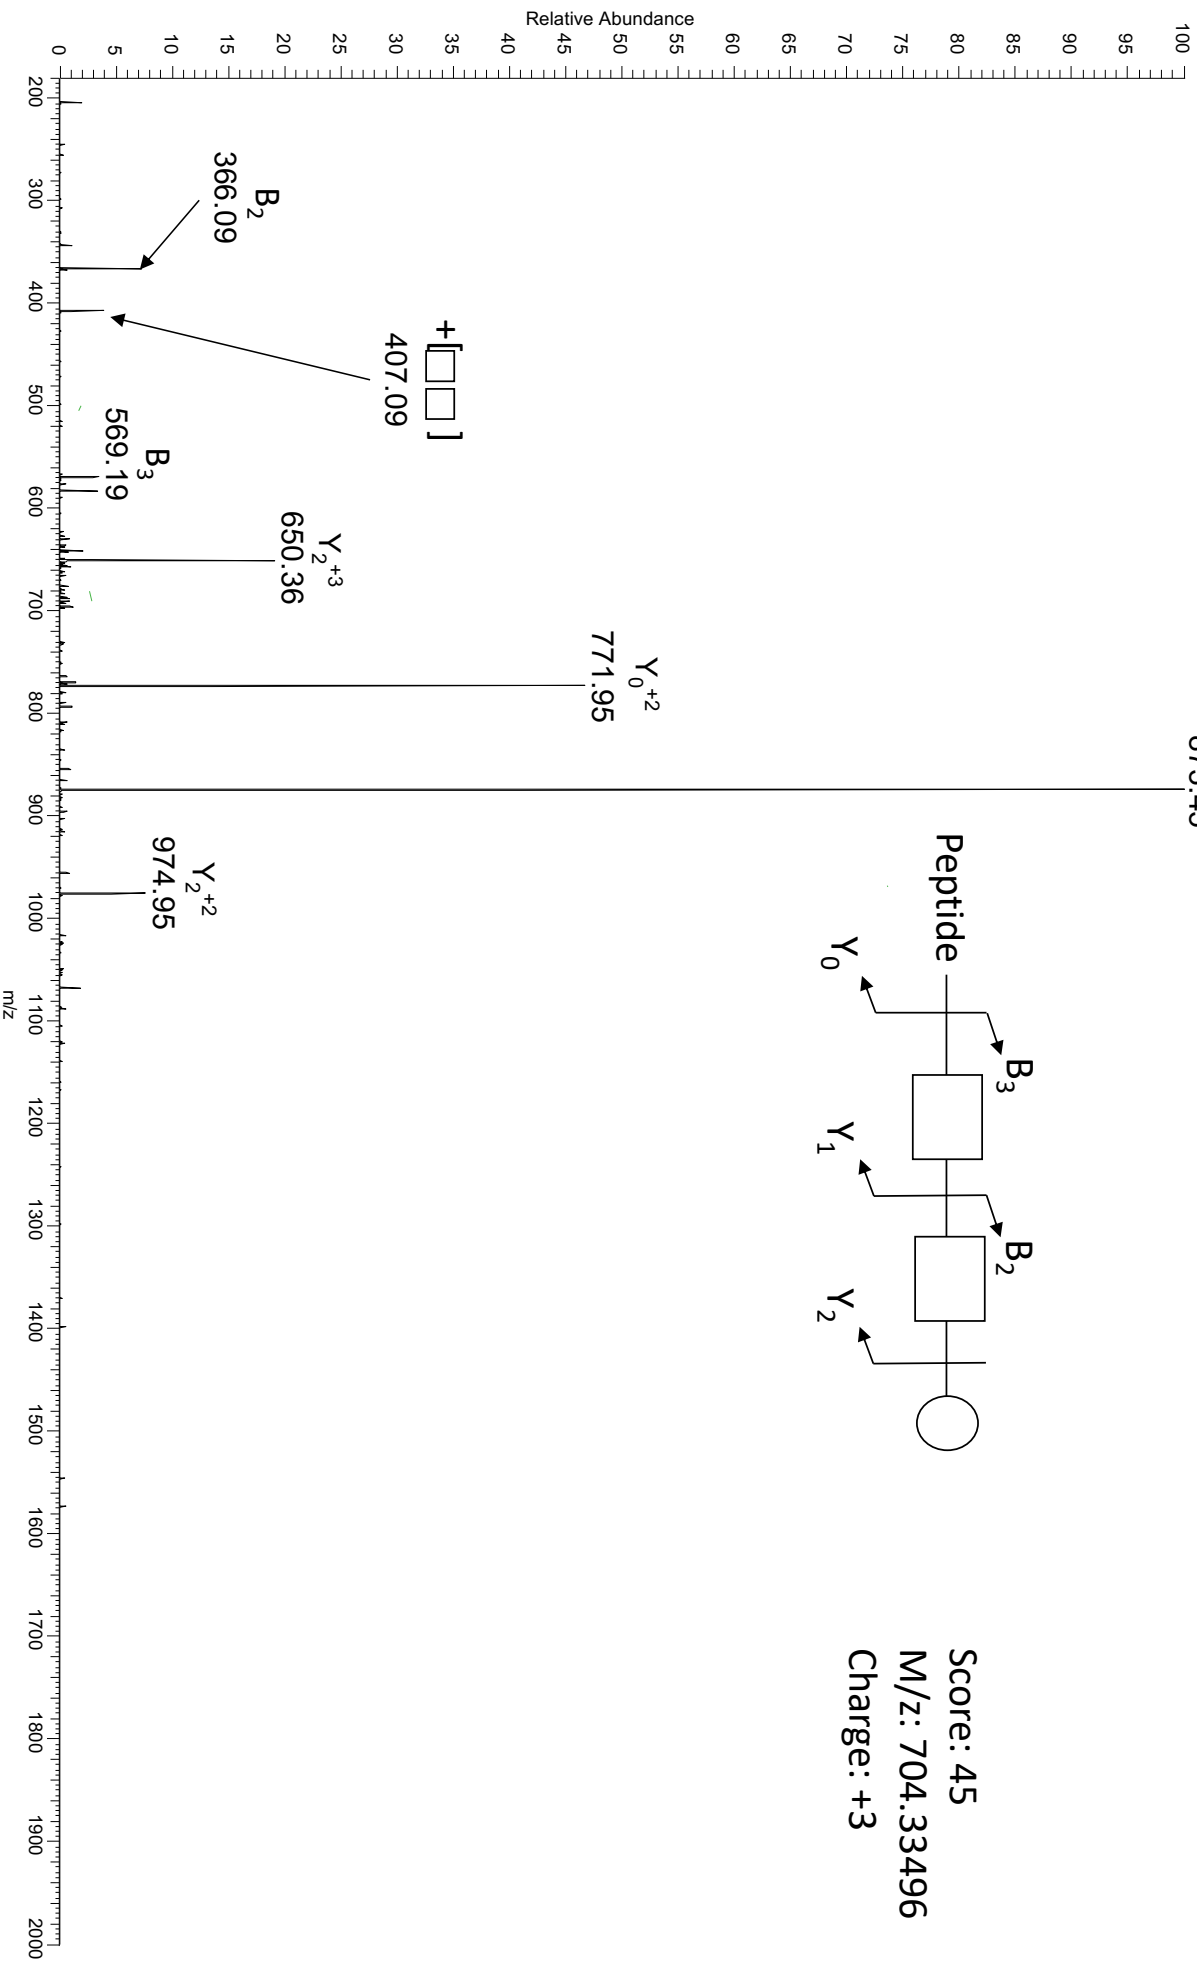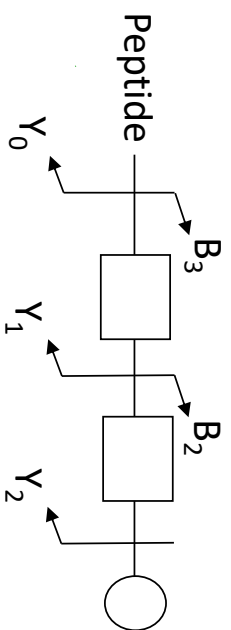

Score: 45  
M/z: 704.33496  
Charge: +3

186.07753

### MASCOT assignment

I  
V/V16  
V/V15  
V/V14  
V/V13  
V/V12  
V/V11  
V/V10  
V/V9  
V/V8  
V/V7  
V/V6  
V/V5  
V/V4  
V/V3  
V/V2  
V/V1  
K  
I  
G  
D  
G  
R  
P  
A  
S  
G  
A  
G  
G  
Q  
C  
O  
P  
E  
L  
E  
I  
G  
D  
G  
R  
P  
A  
S  
G  
A  
G  
G  
Q  
C  
O  
P  
E  
L  
E

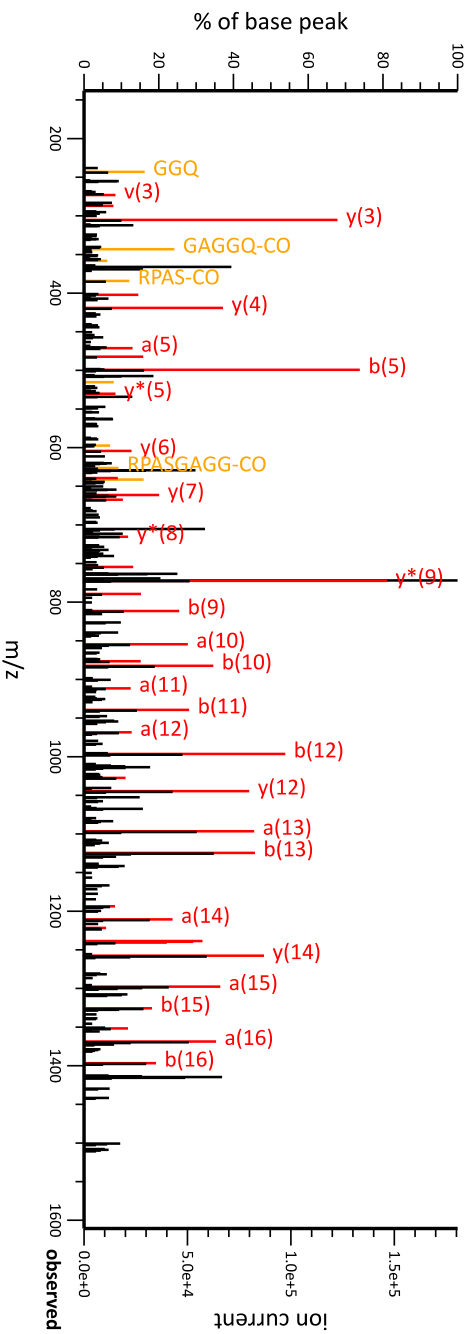

Score: 45  
M/z: 704.33496  
Charge: +3

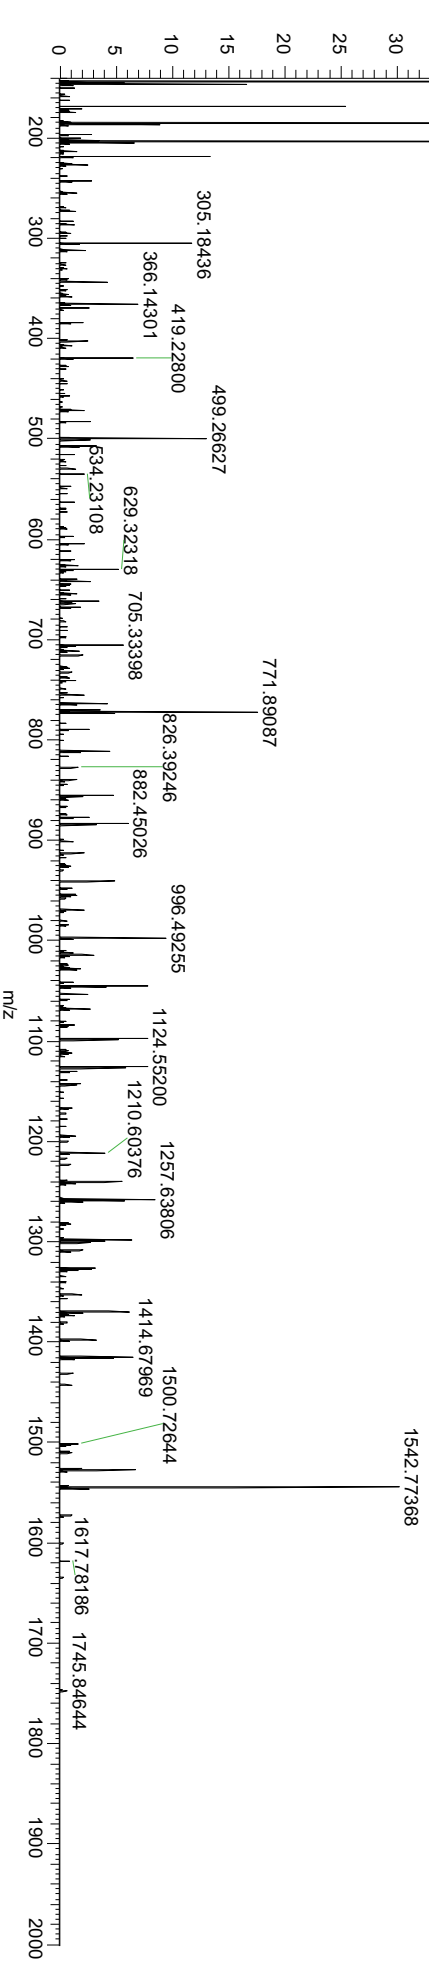



ITMS-CID

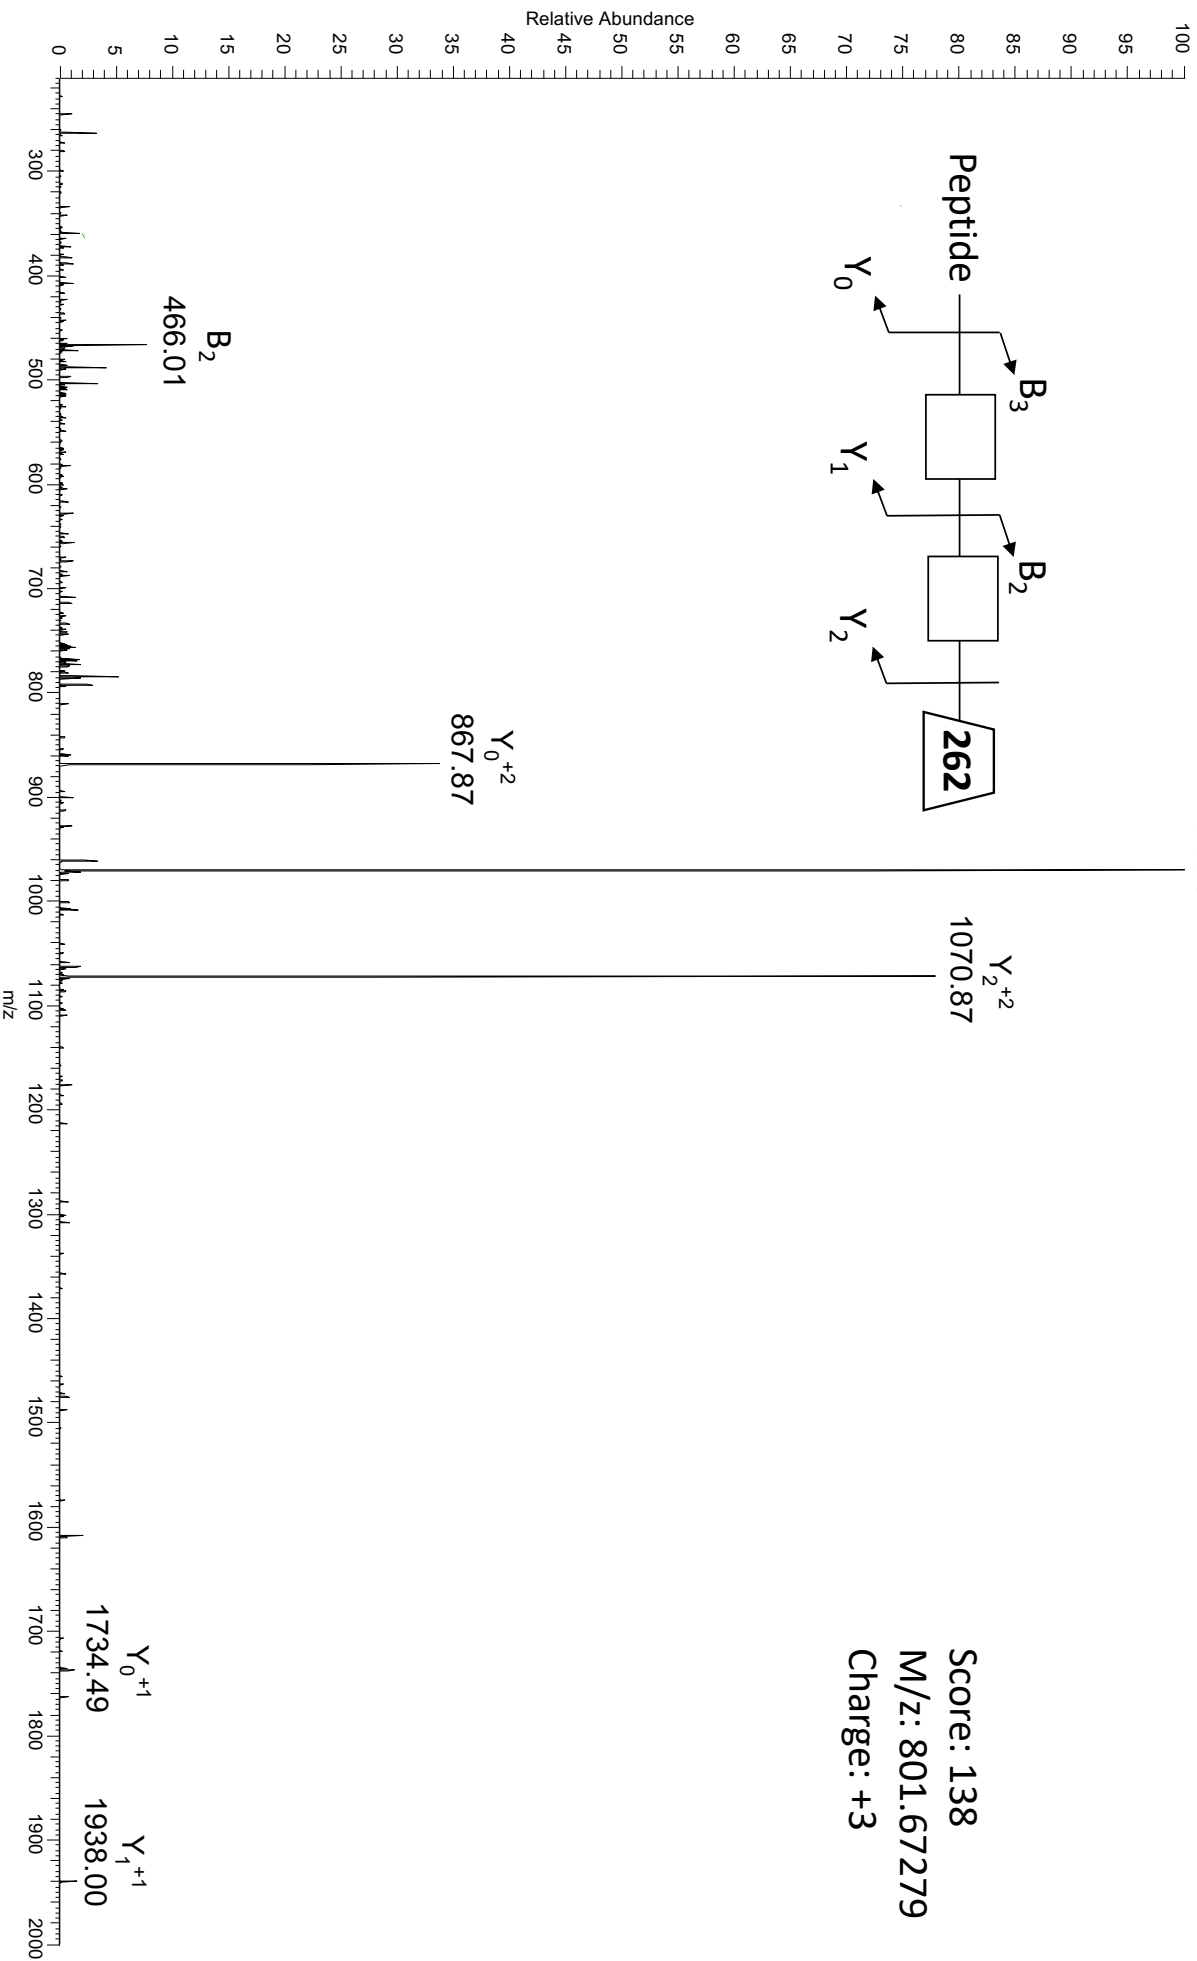

Score: 138  
M/z: 801.67279  
Charge: +3

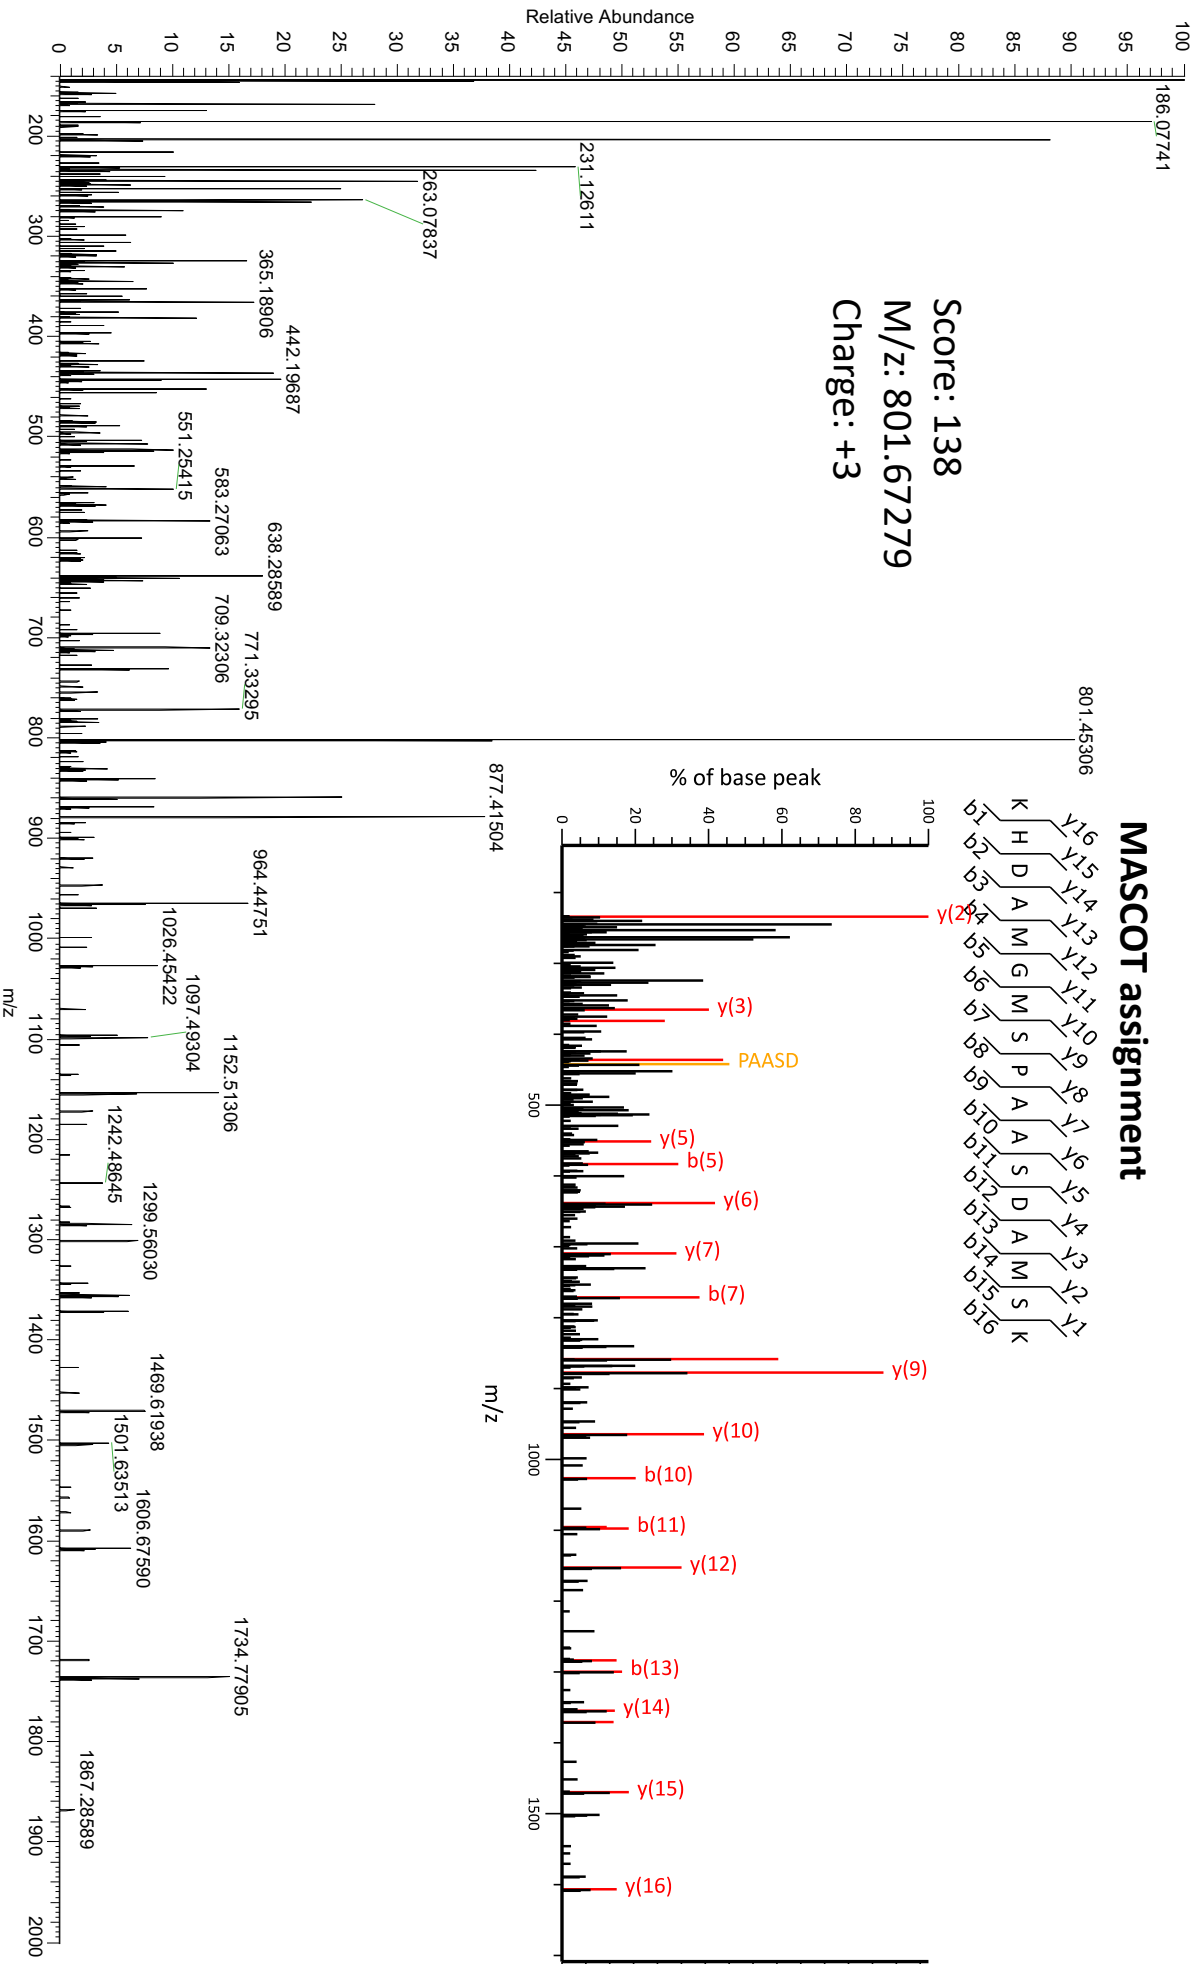

ITMS-CID

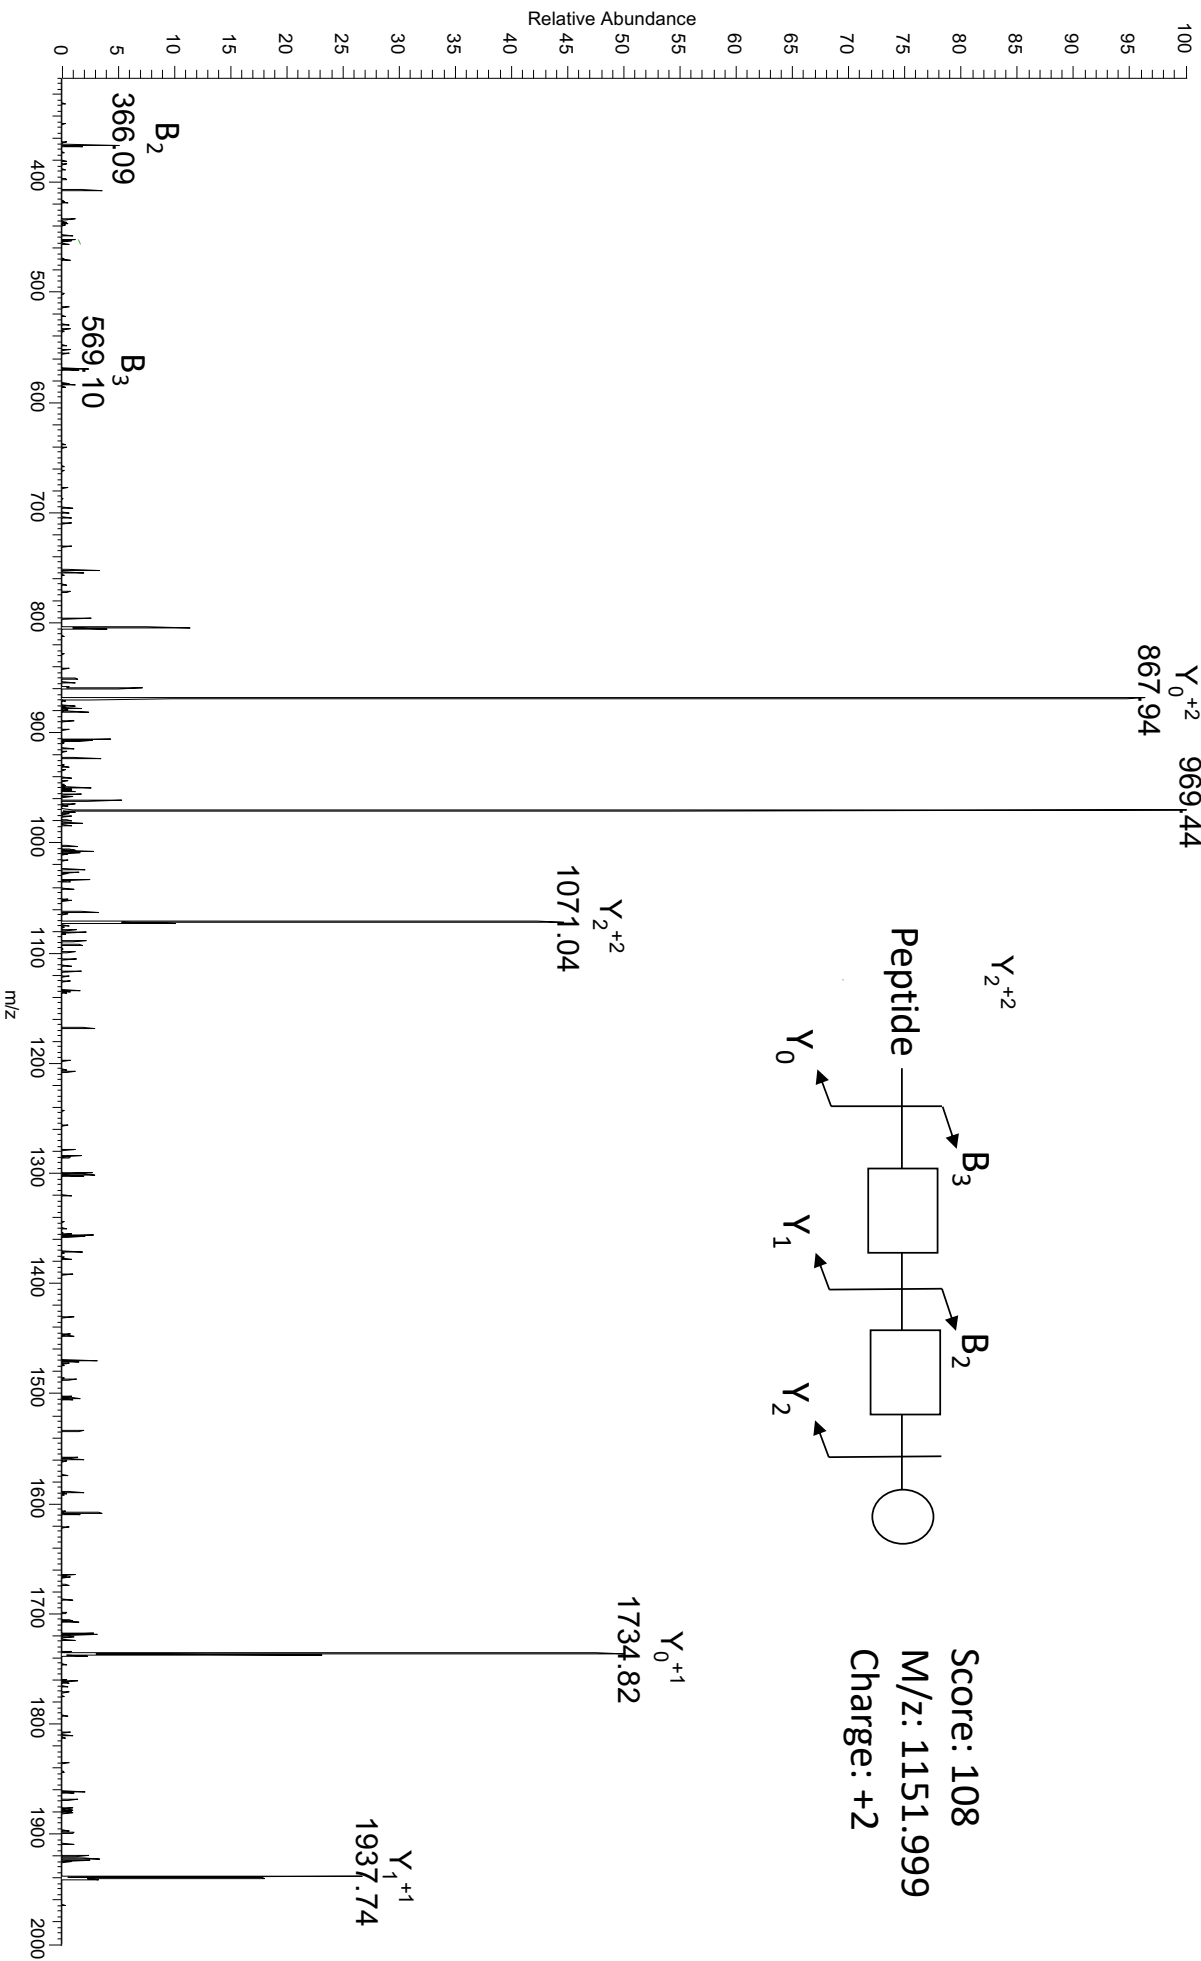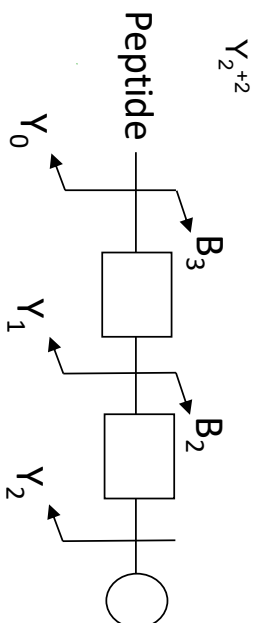

Score: 108  
M/z: 1151.999  
Charge: +2

186.07764

### MASCOT assignment

- y16
- y15
- y14
- y13
- y12
- y11
- y10
- y9
- y8
- y7
- y6
- y5
- y4
- y3
- y2
- y1
- b/a1
- b/a2
- b/a3
- b/a4
- b/a5
- b/a6
- b/a7
- b/a8
- b/a9
- b/a10
- b/a11
- b/a12
- b/a13
- b/a14
- b/a15
- b/a16

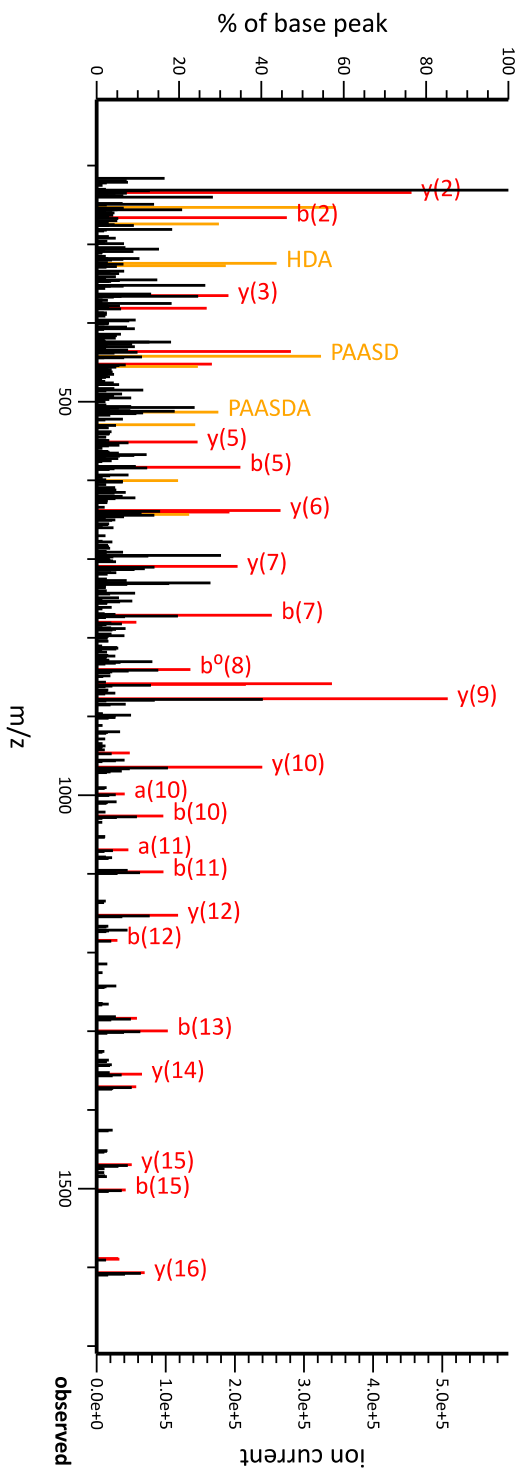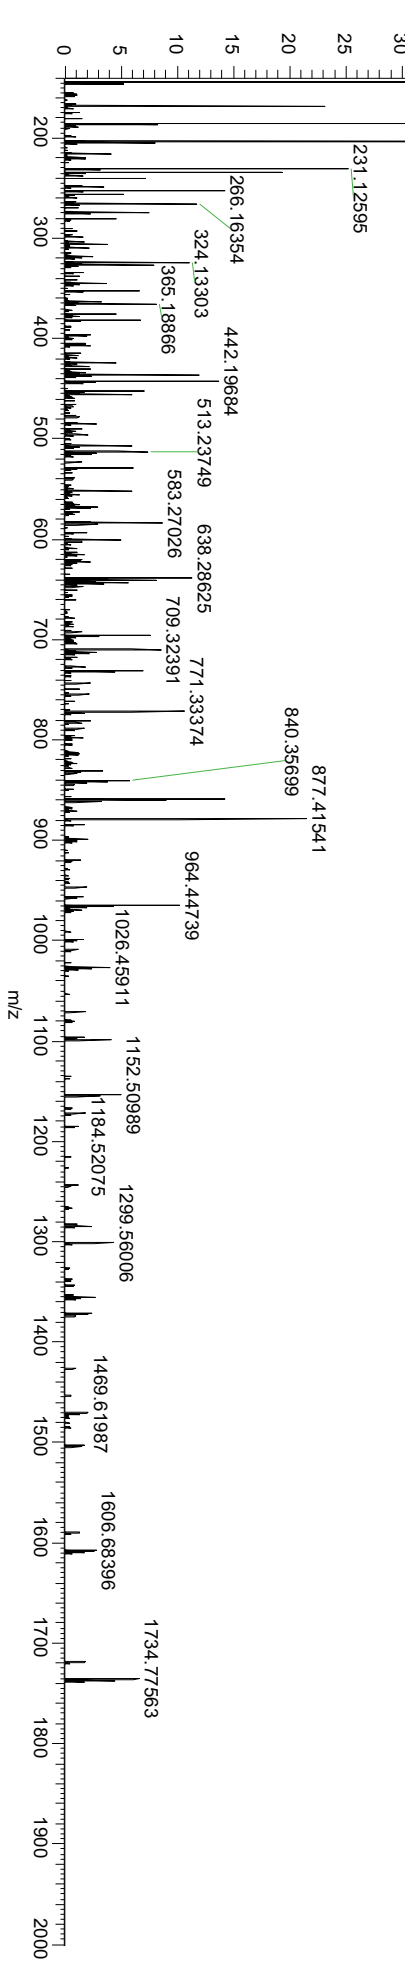

Score: 108  
M/z: 1151.999  
Charge: +2

ITMS-CID

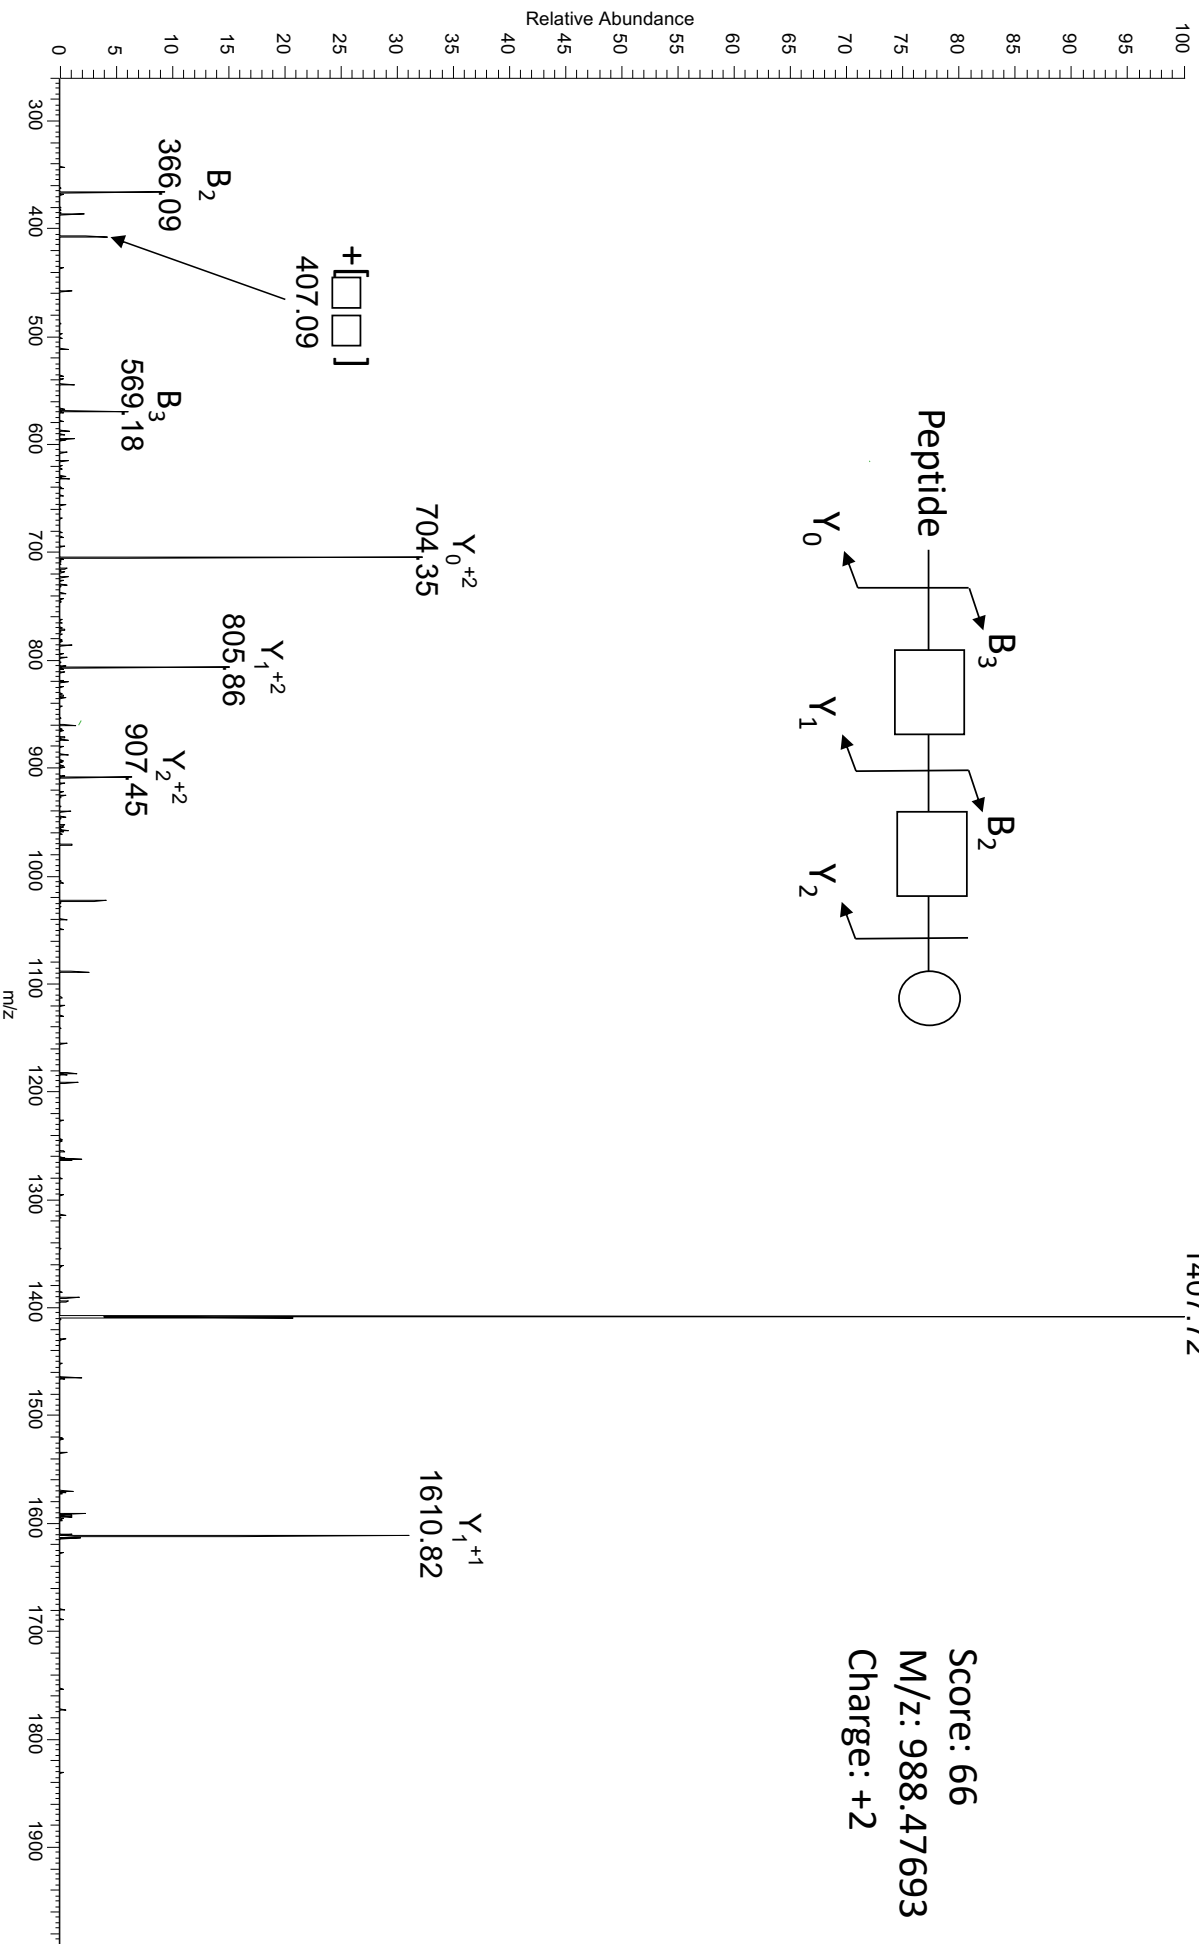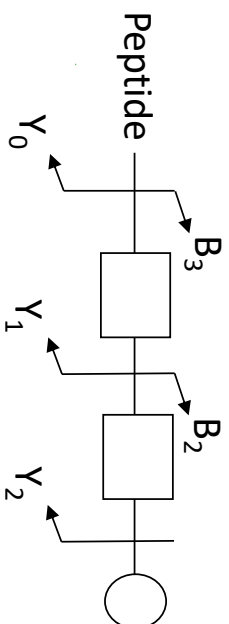

Score: 66  
M/z: 988.47693  
Charge: +2

204.08806

### MASCOT assignment

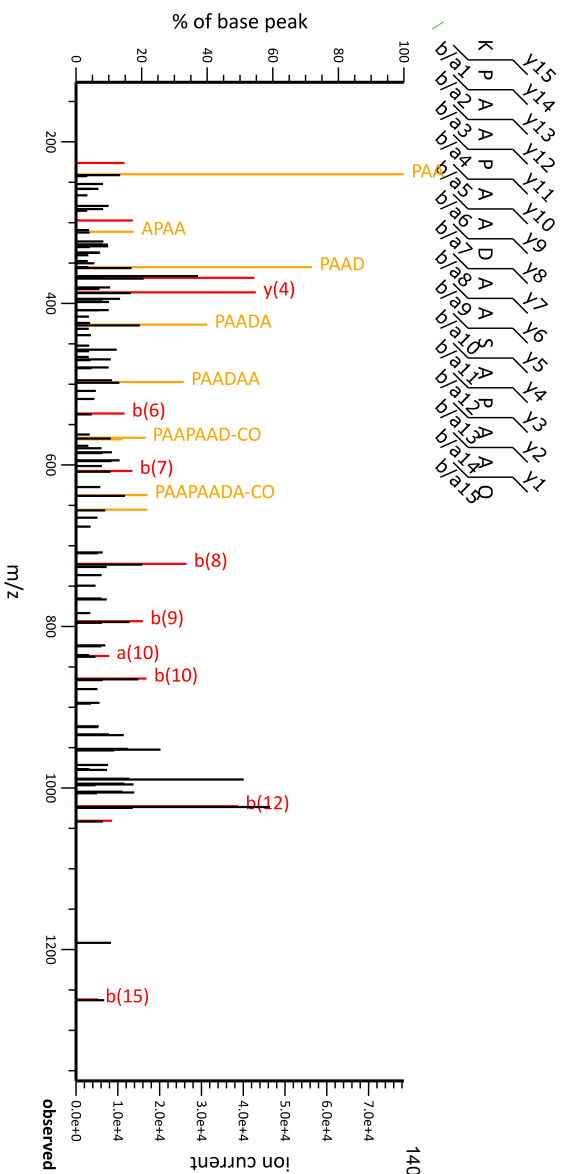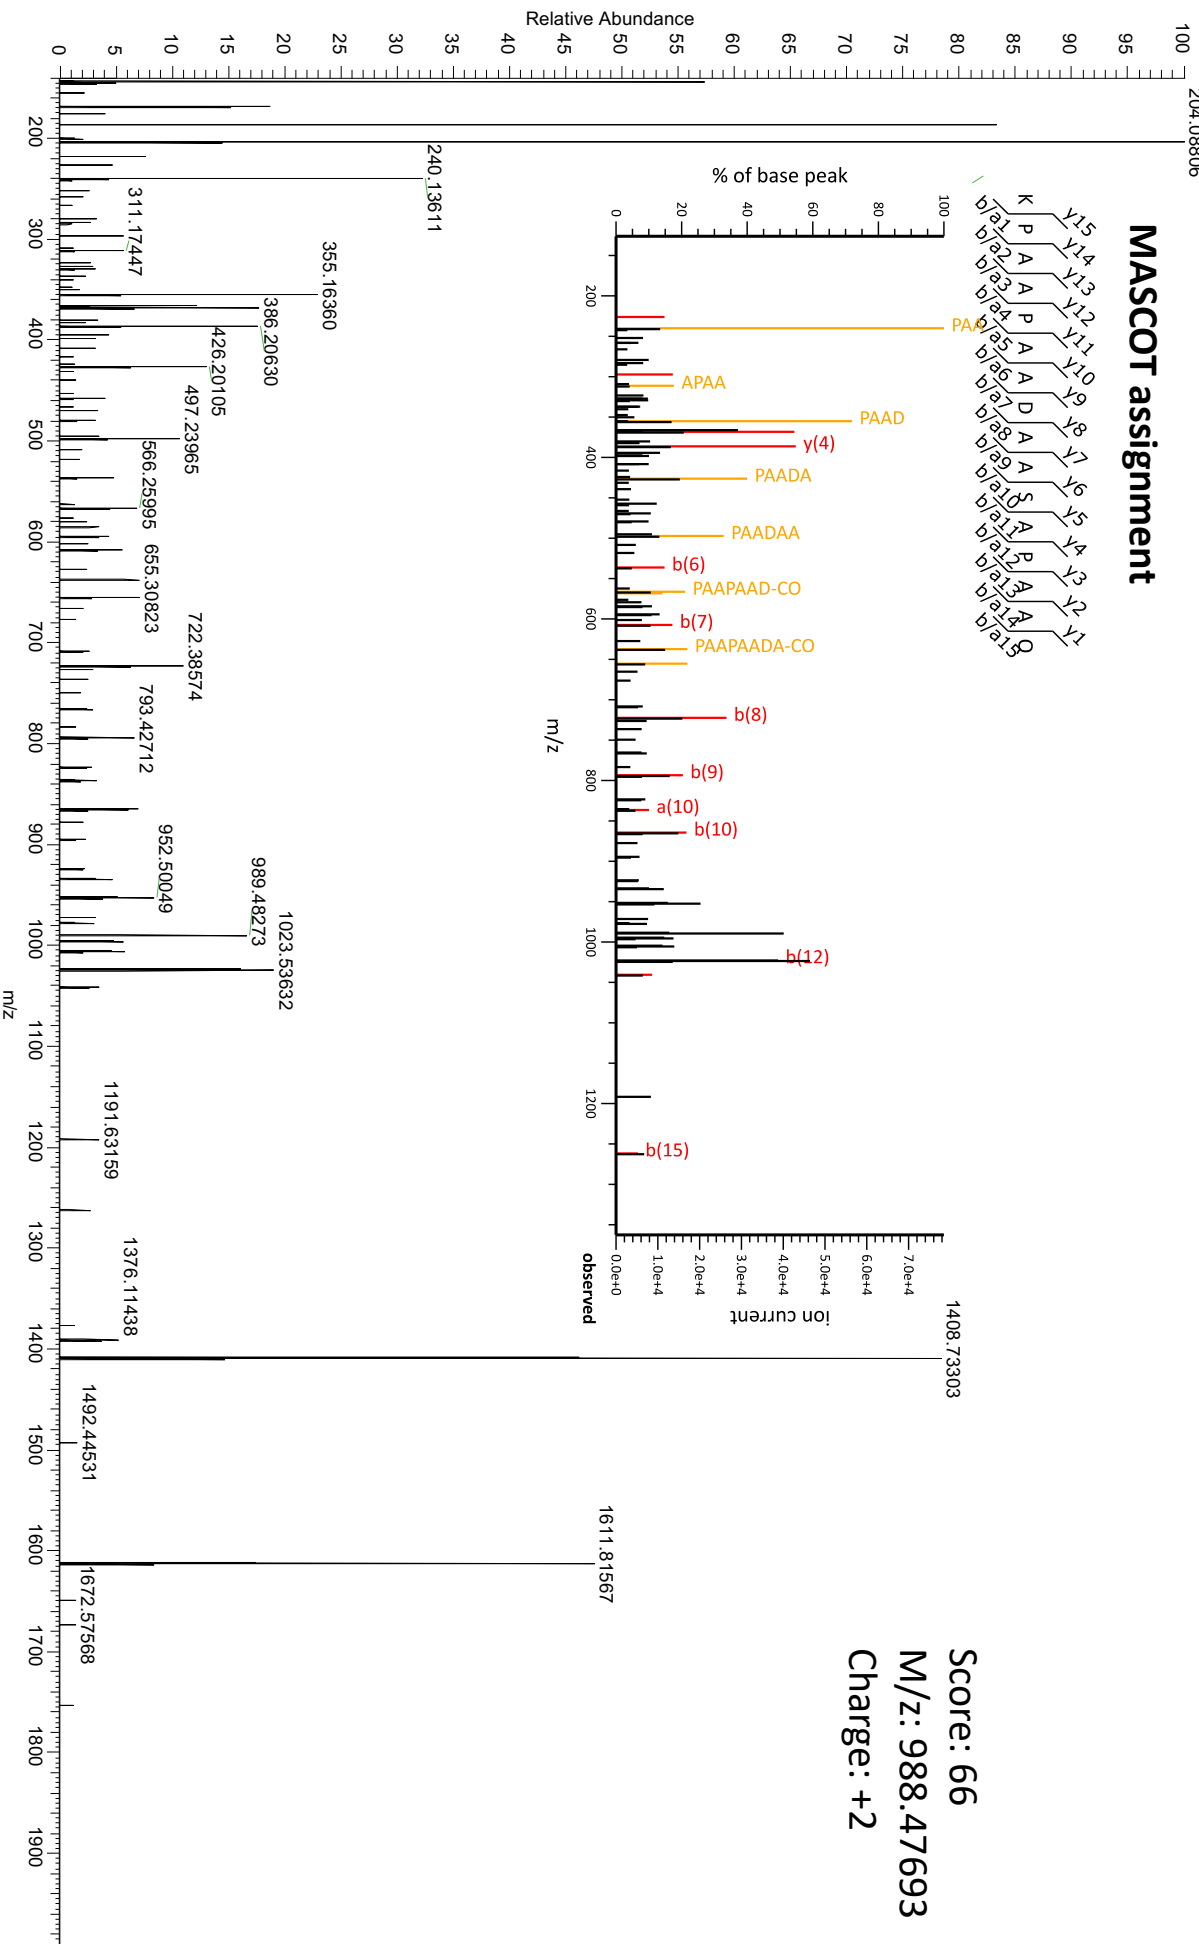

Score: 66  
M/z: 988.47693  
Charge: +2

ITMS-CID

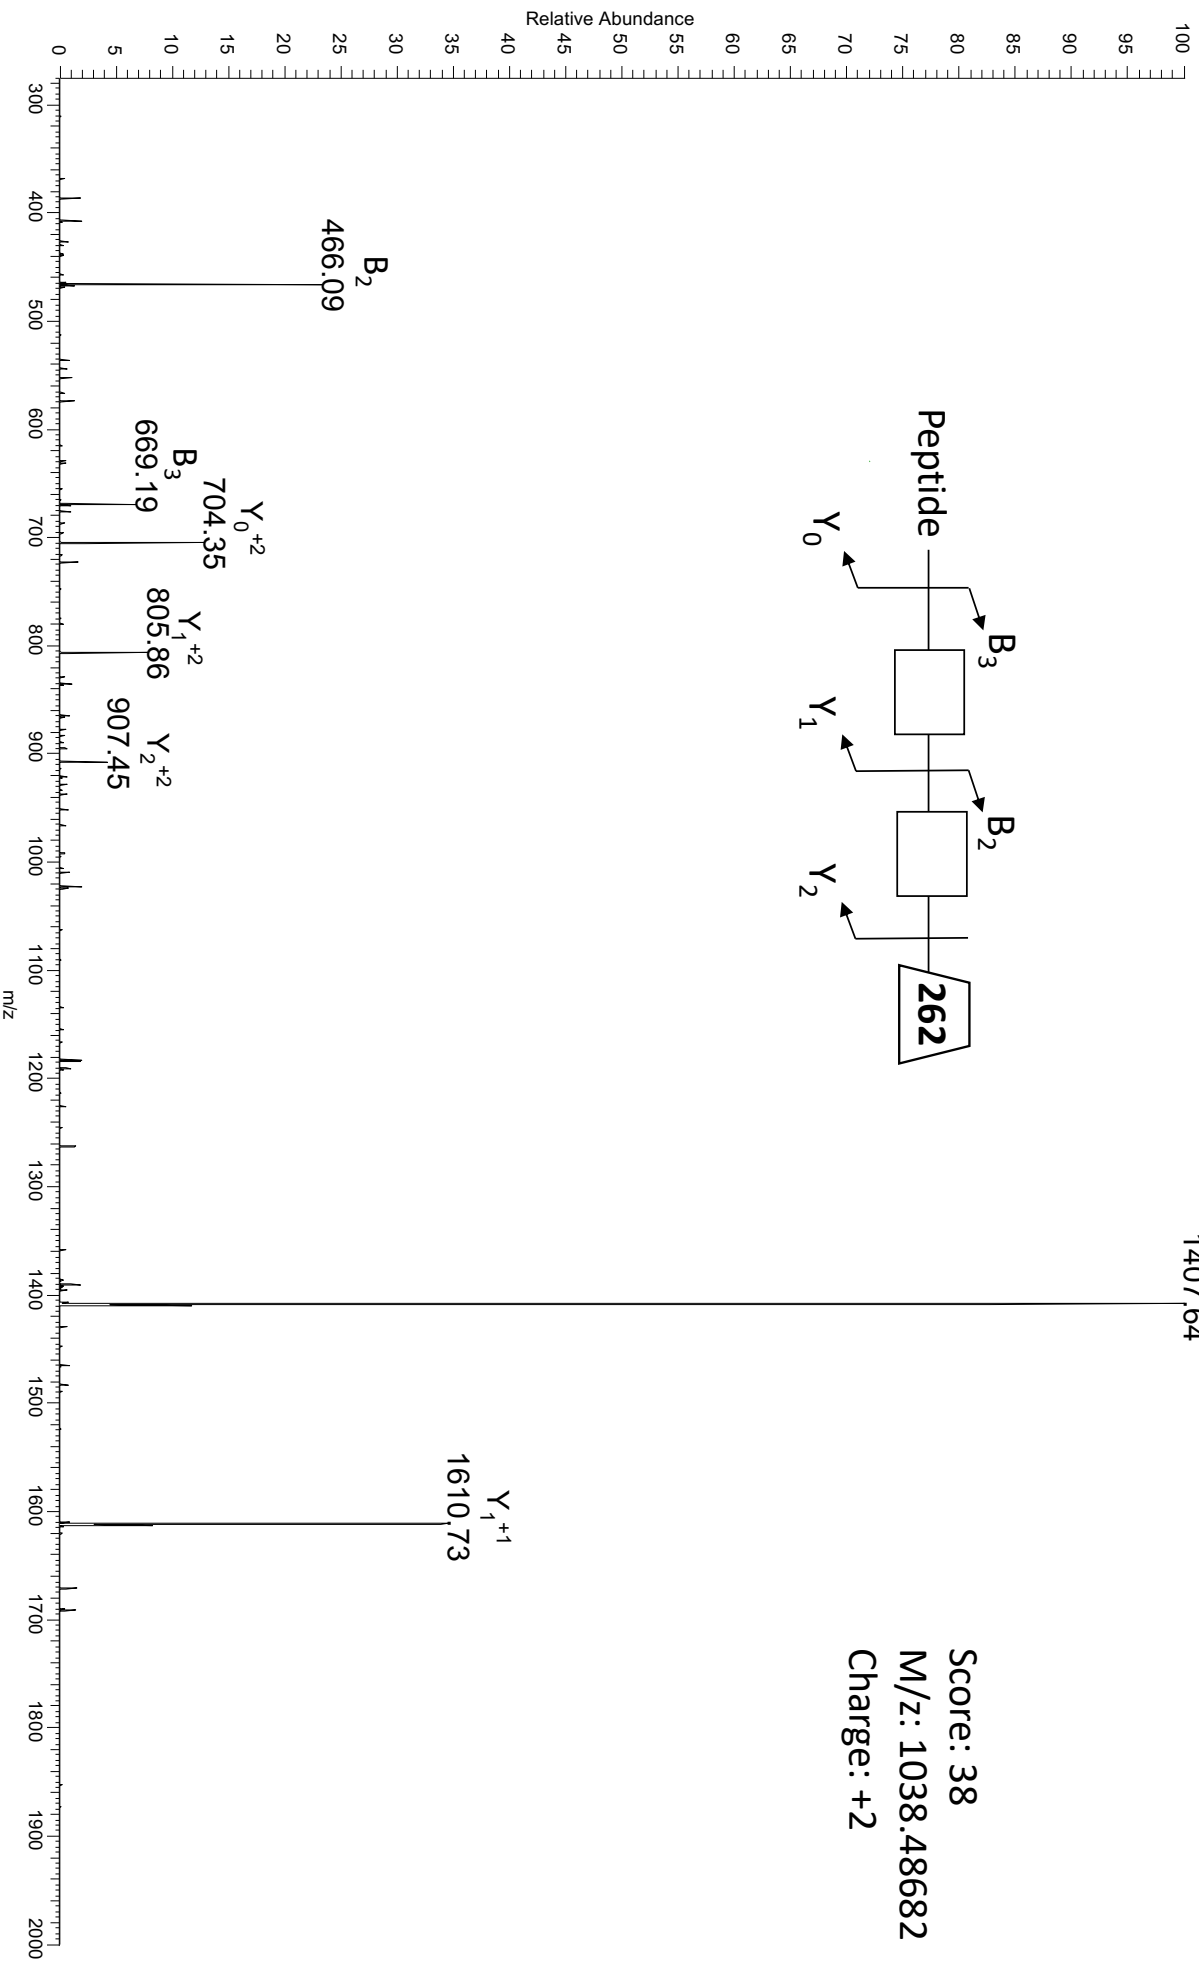

### MASCOT assignment

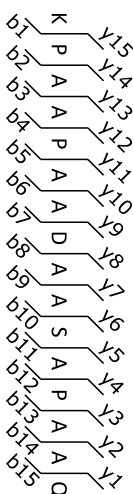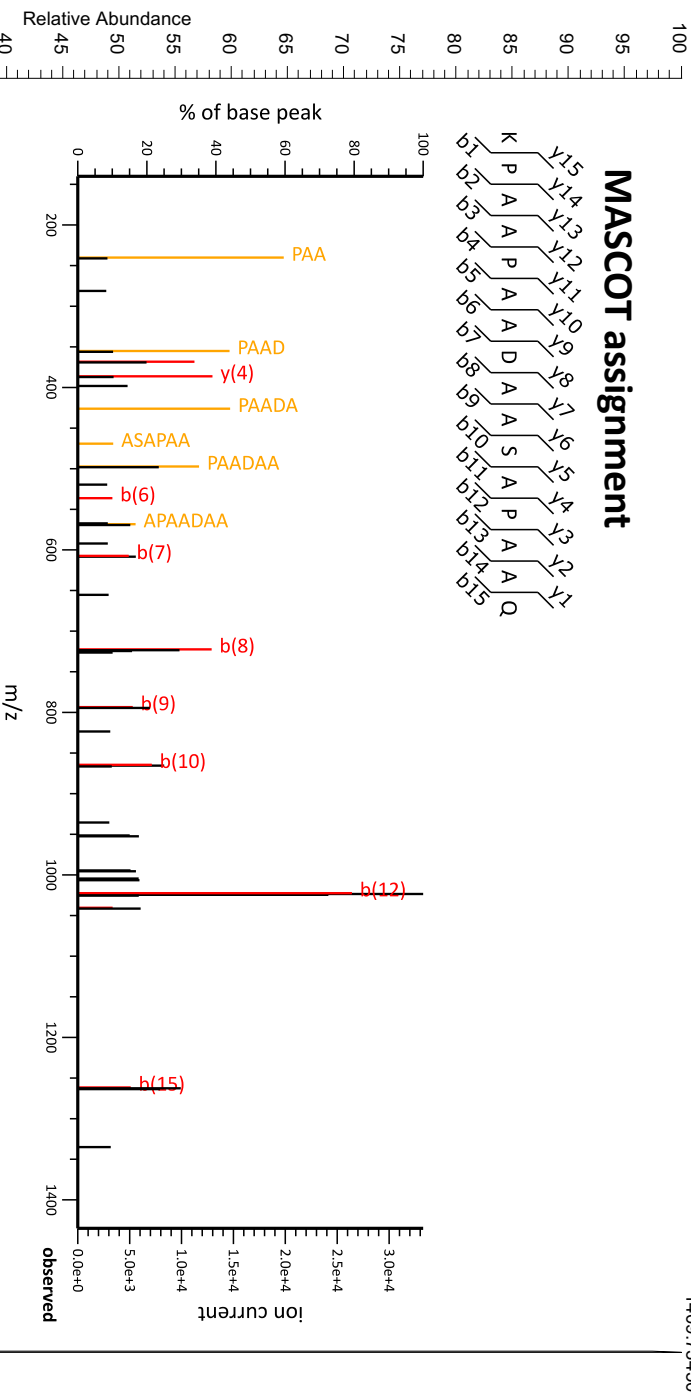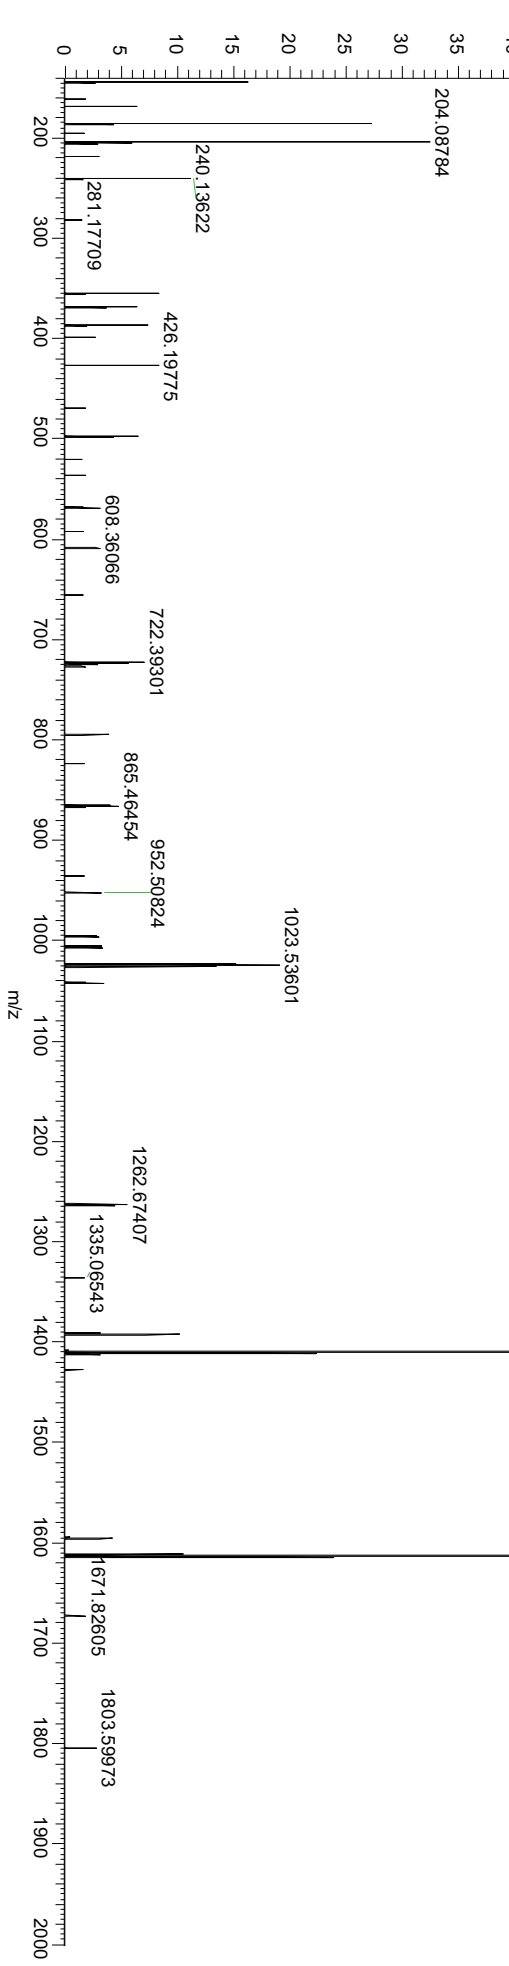

Score: 38  
M/z: 1038.48682  
Charge: +2



ITMS-CID

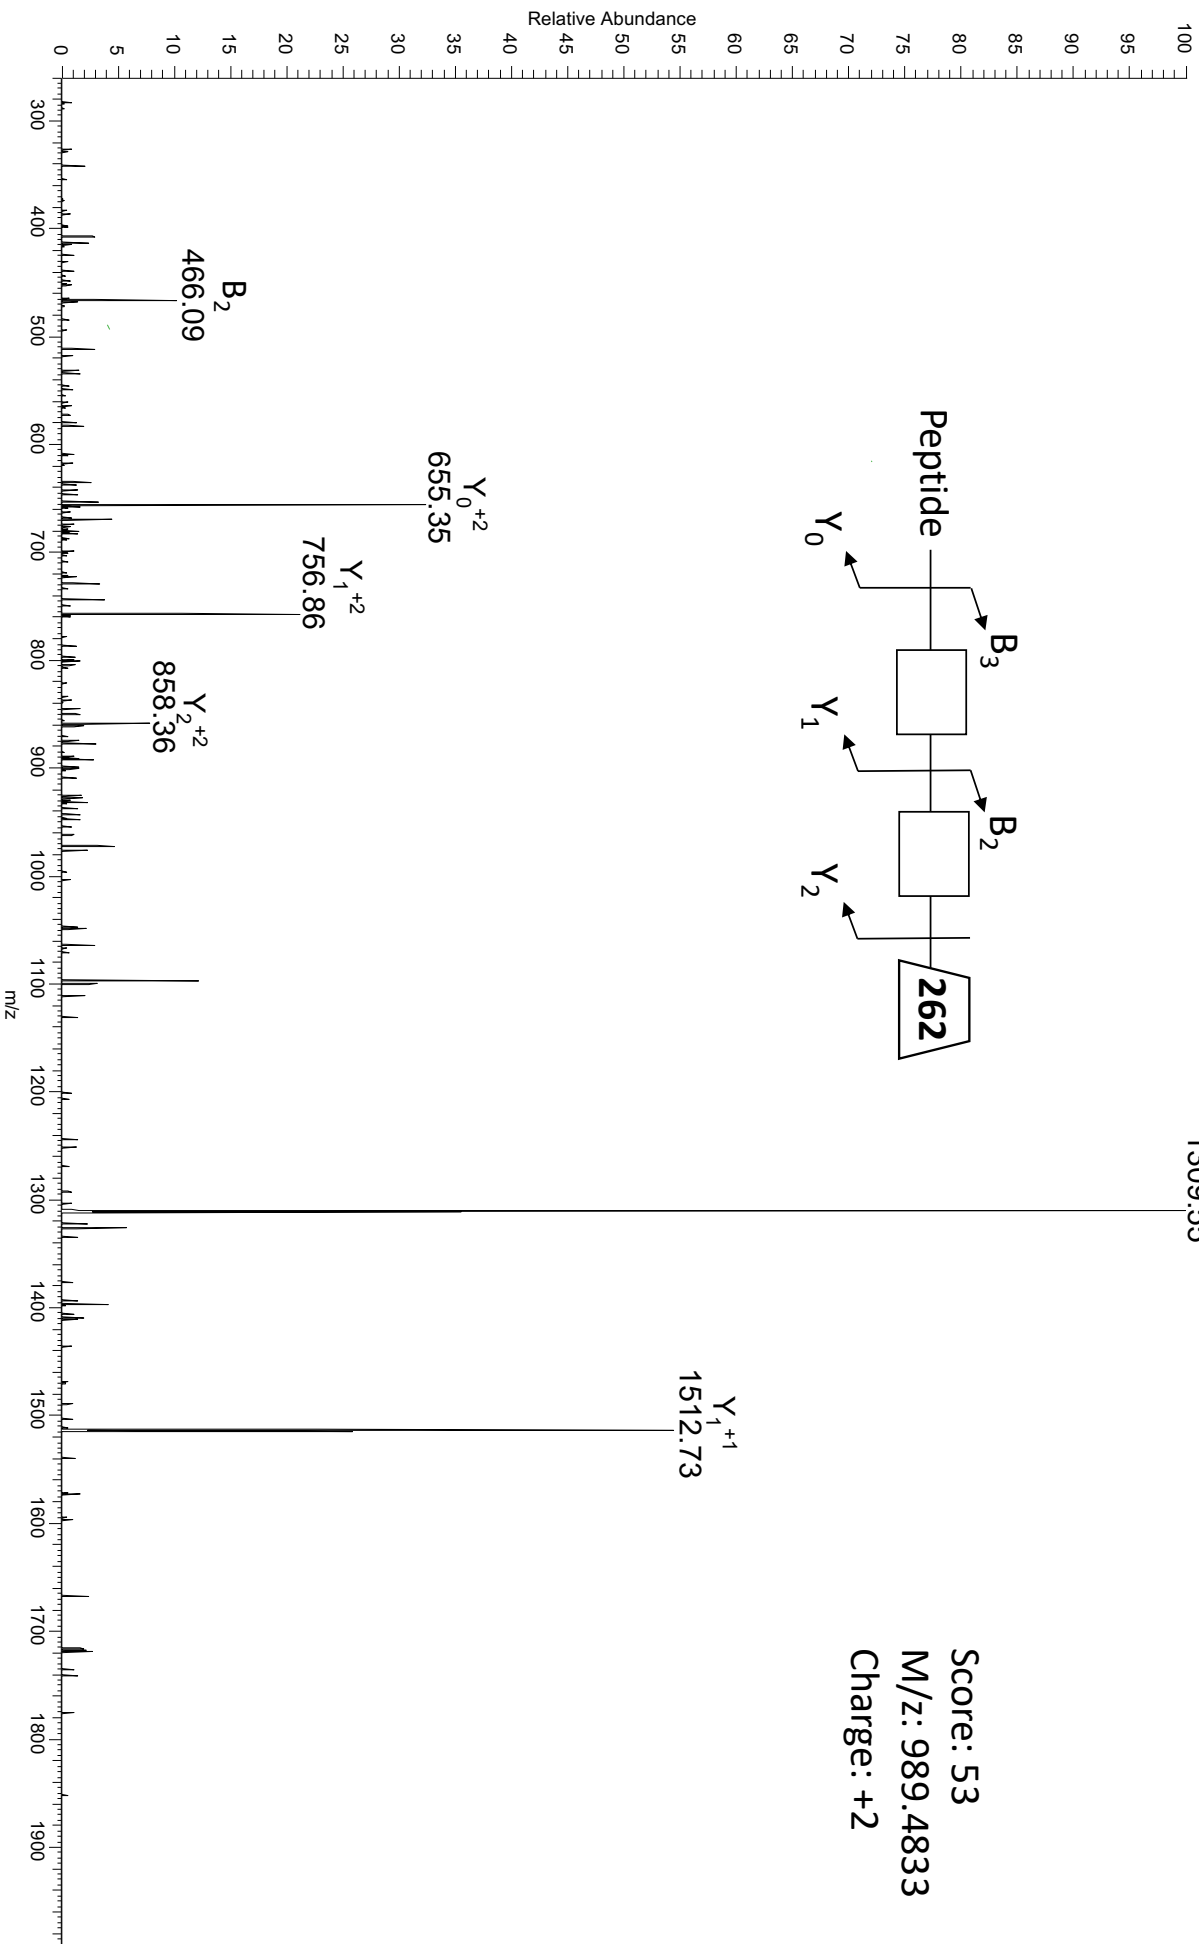

Score: 53  
M/z: 989.4833  
Charge: +2



ITMS-CID

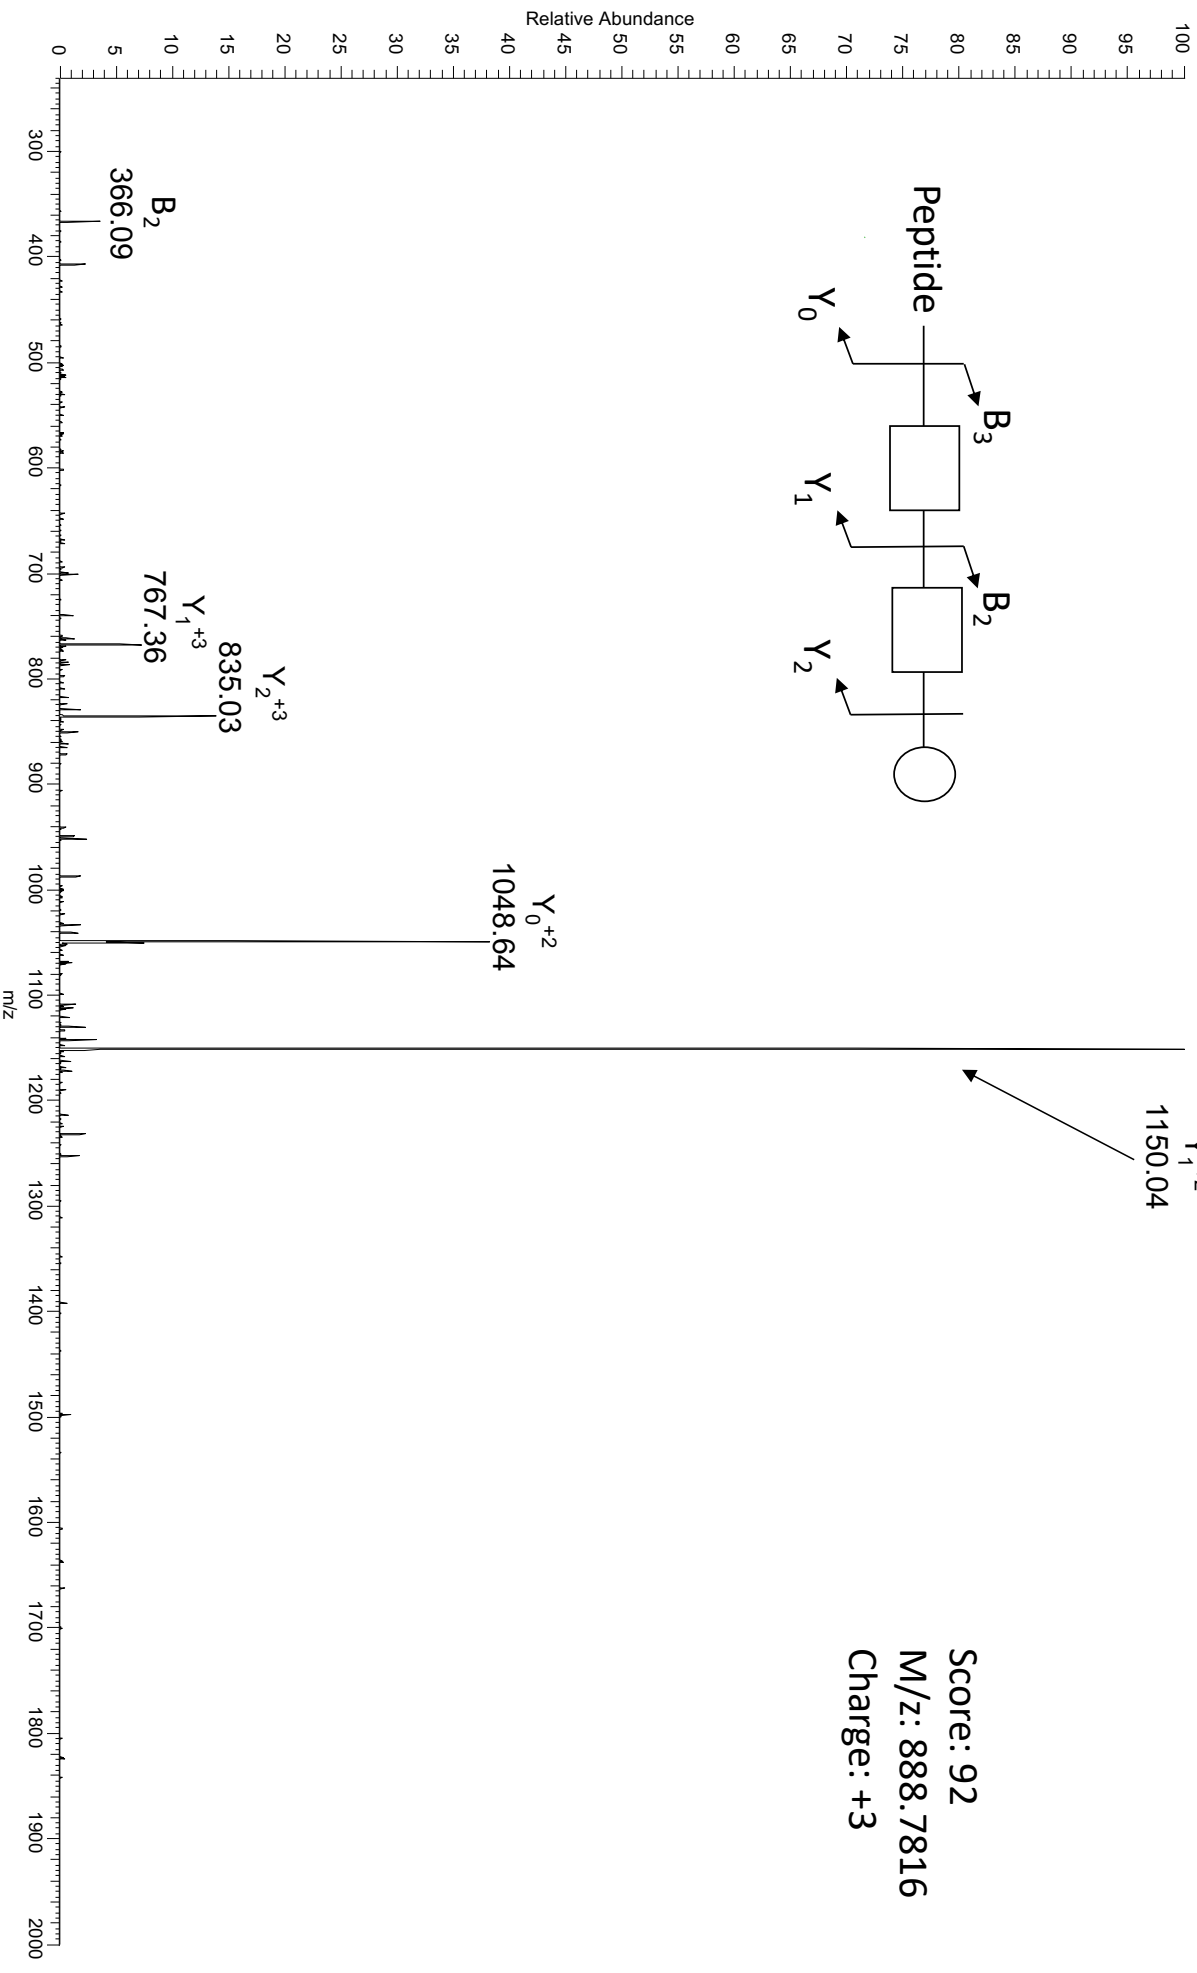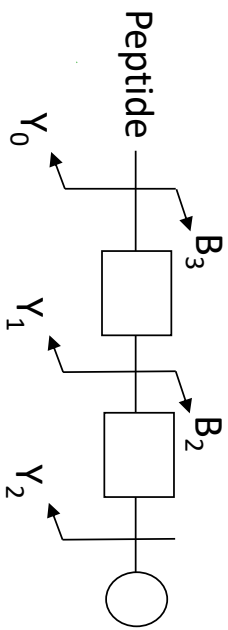

Score: 92  
M/z: 888.7816  
Charge: +3

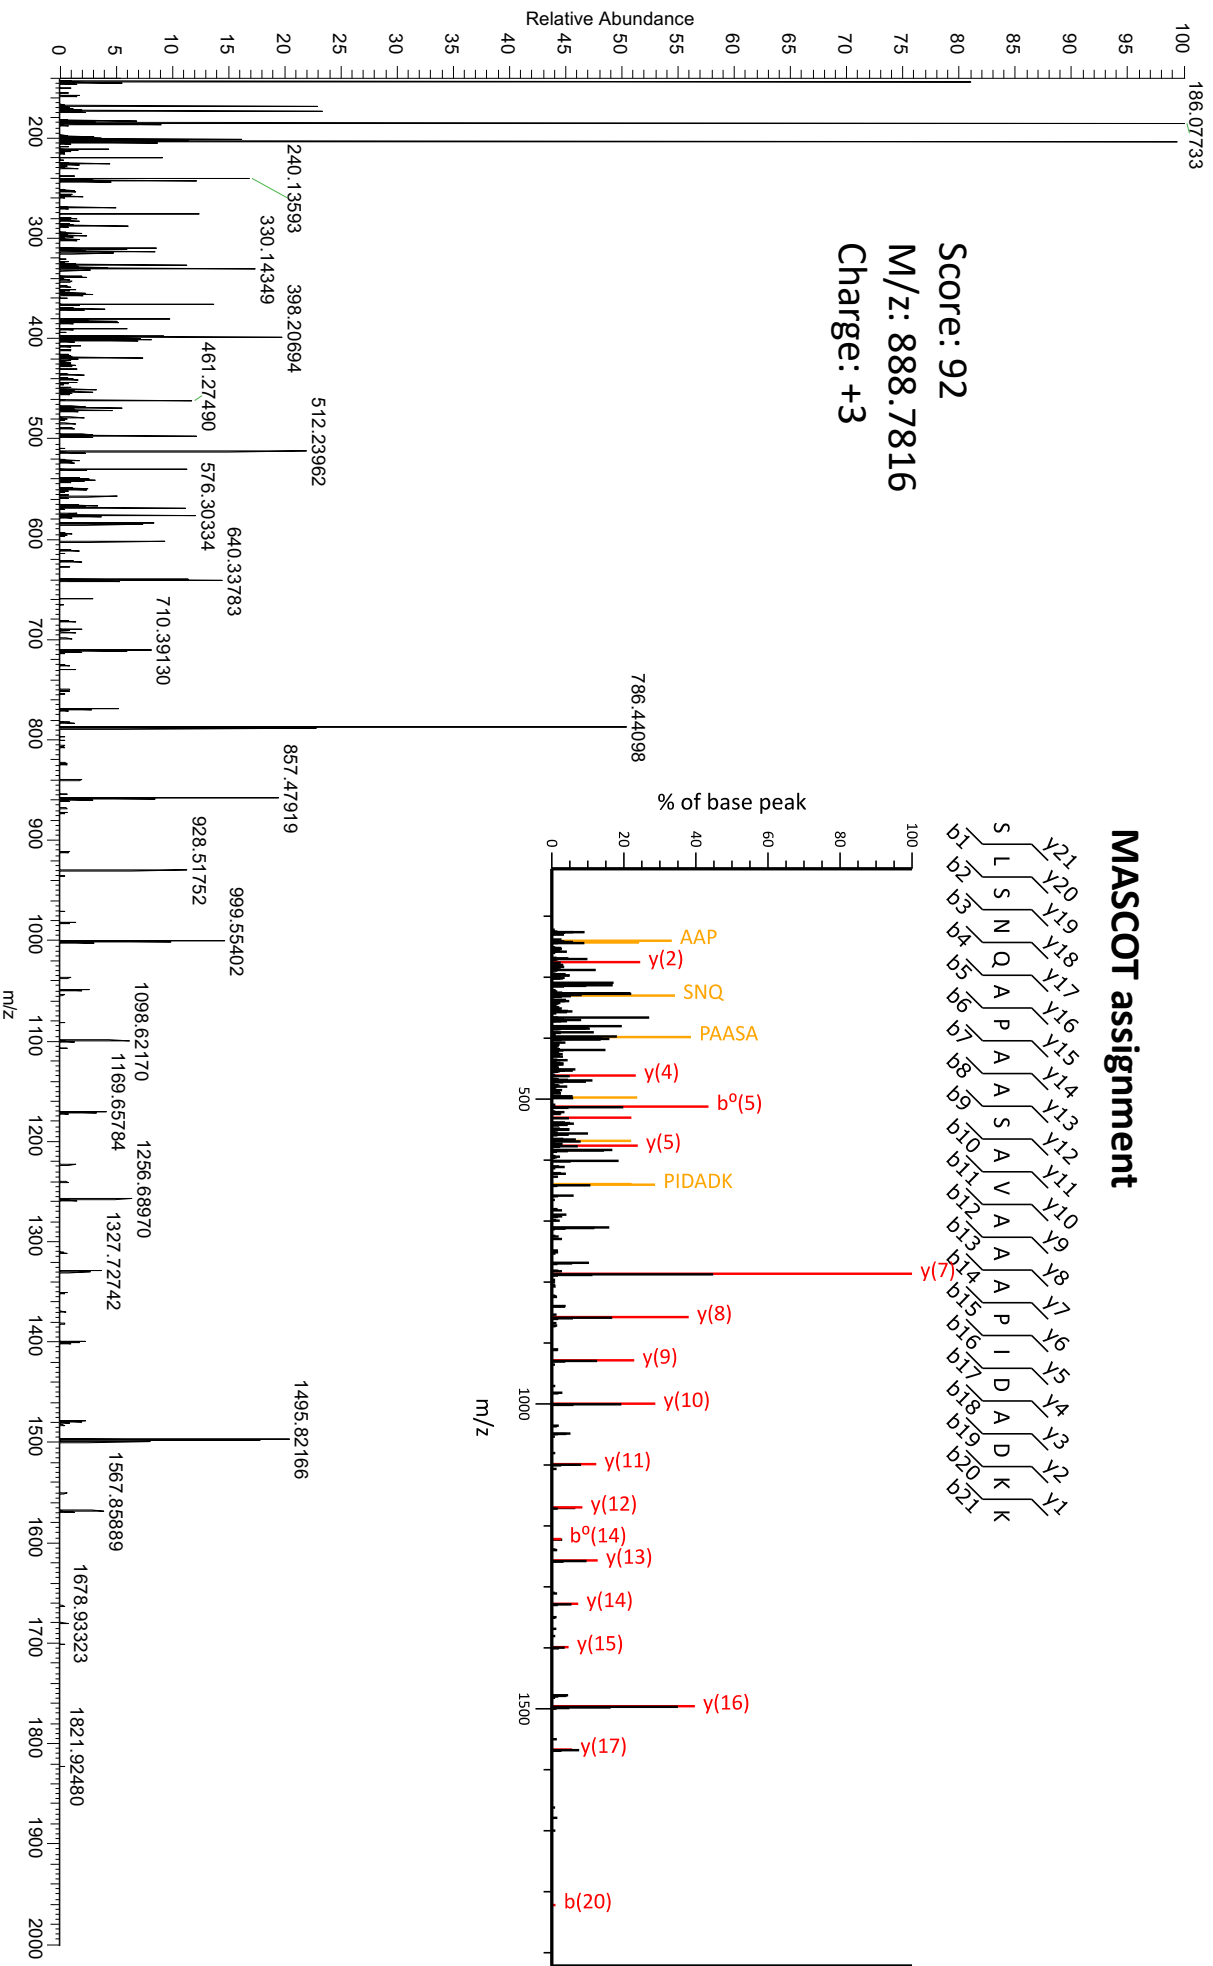

### MASCOT assignment

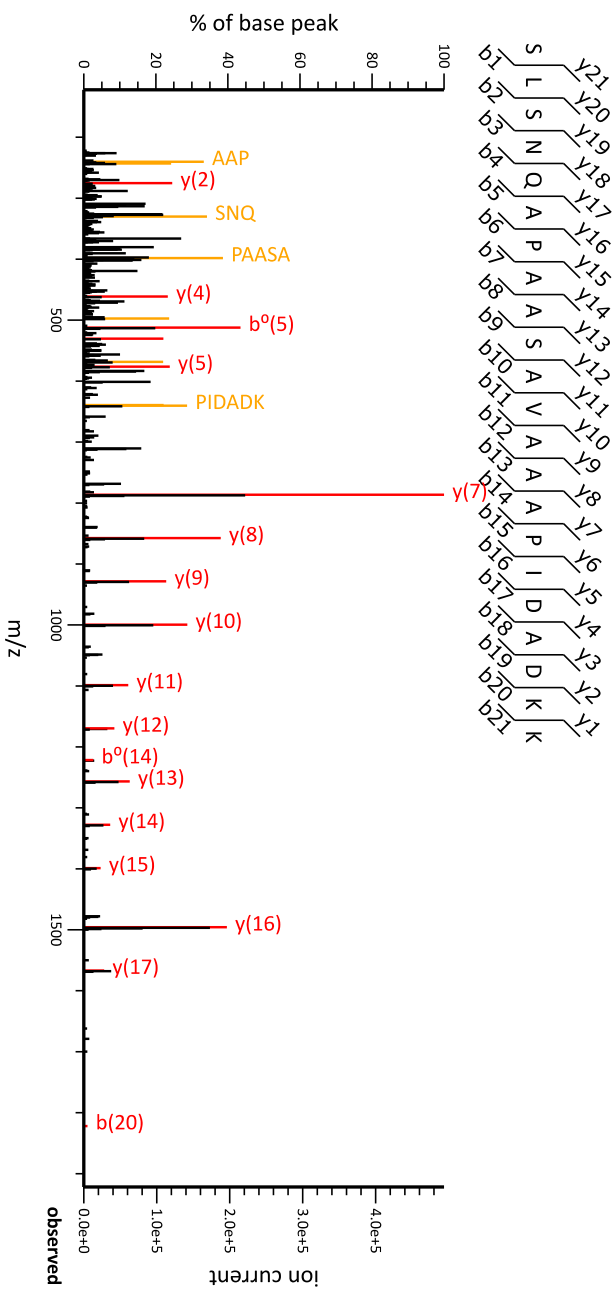

ITMS-CID

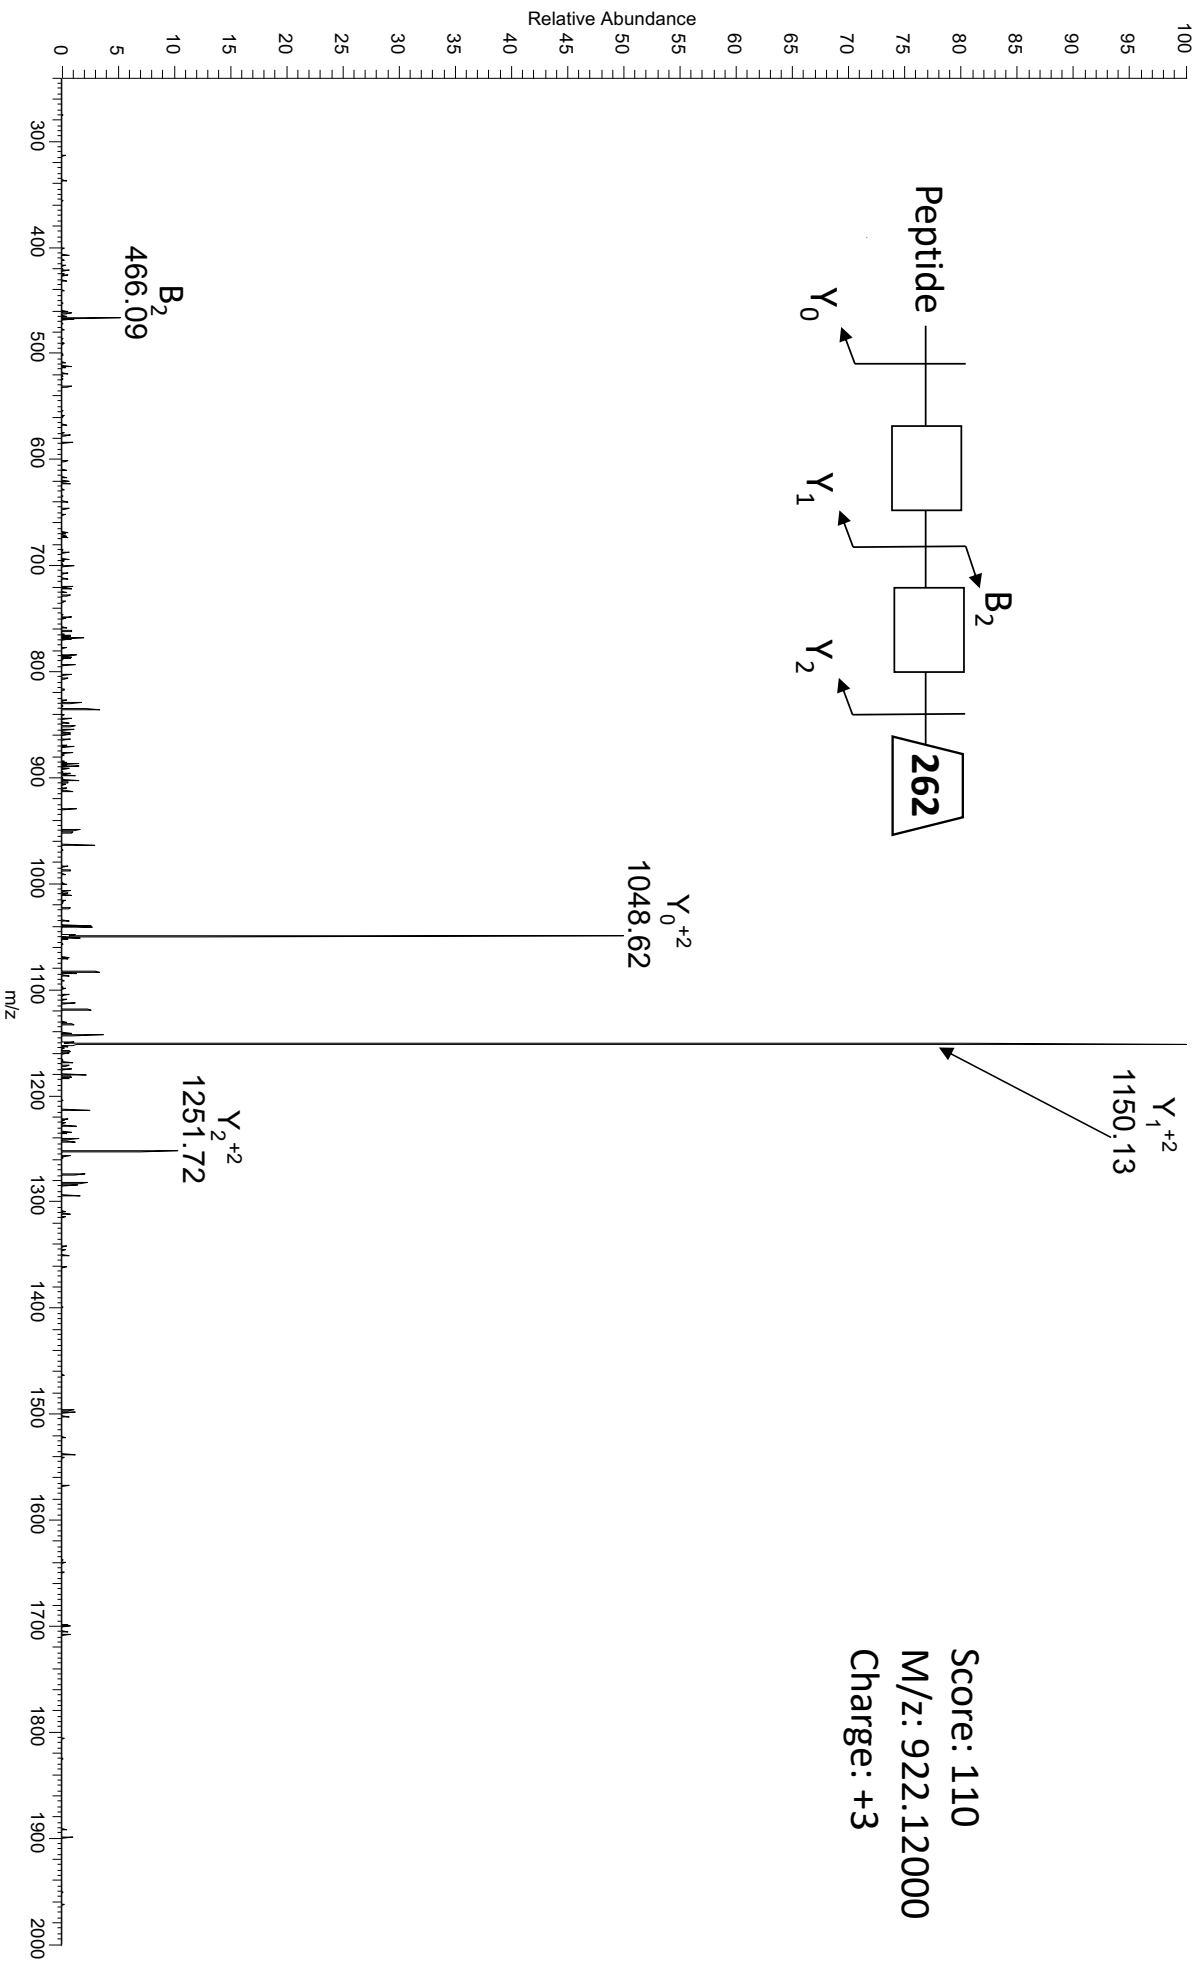

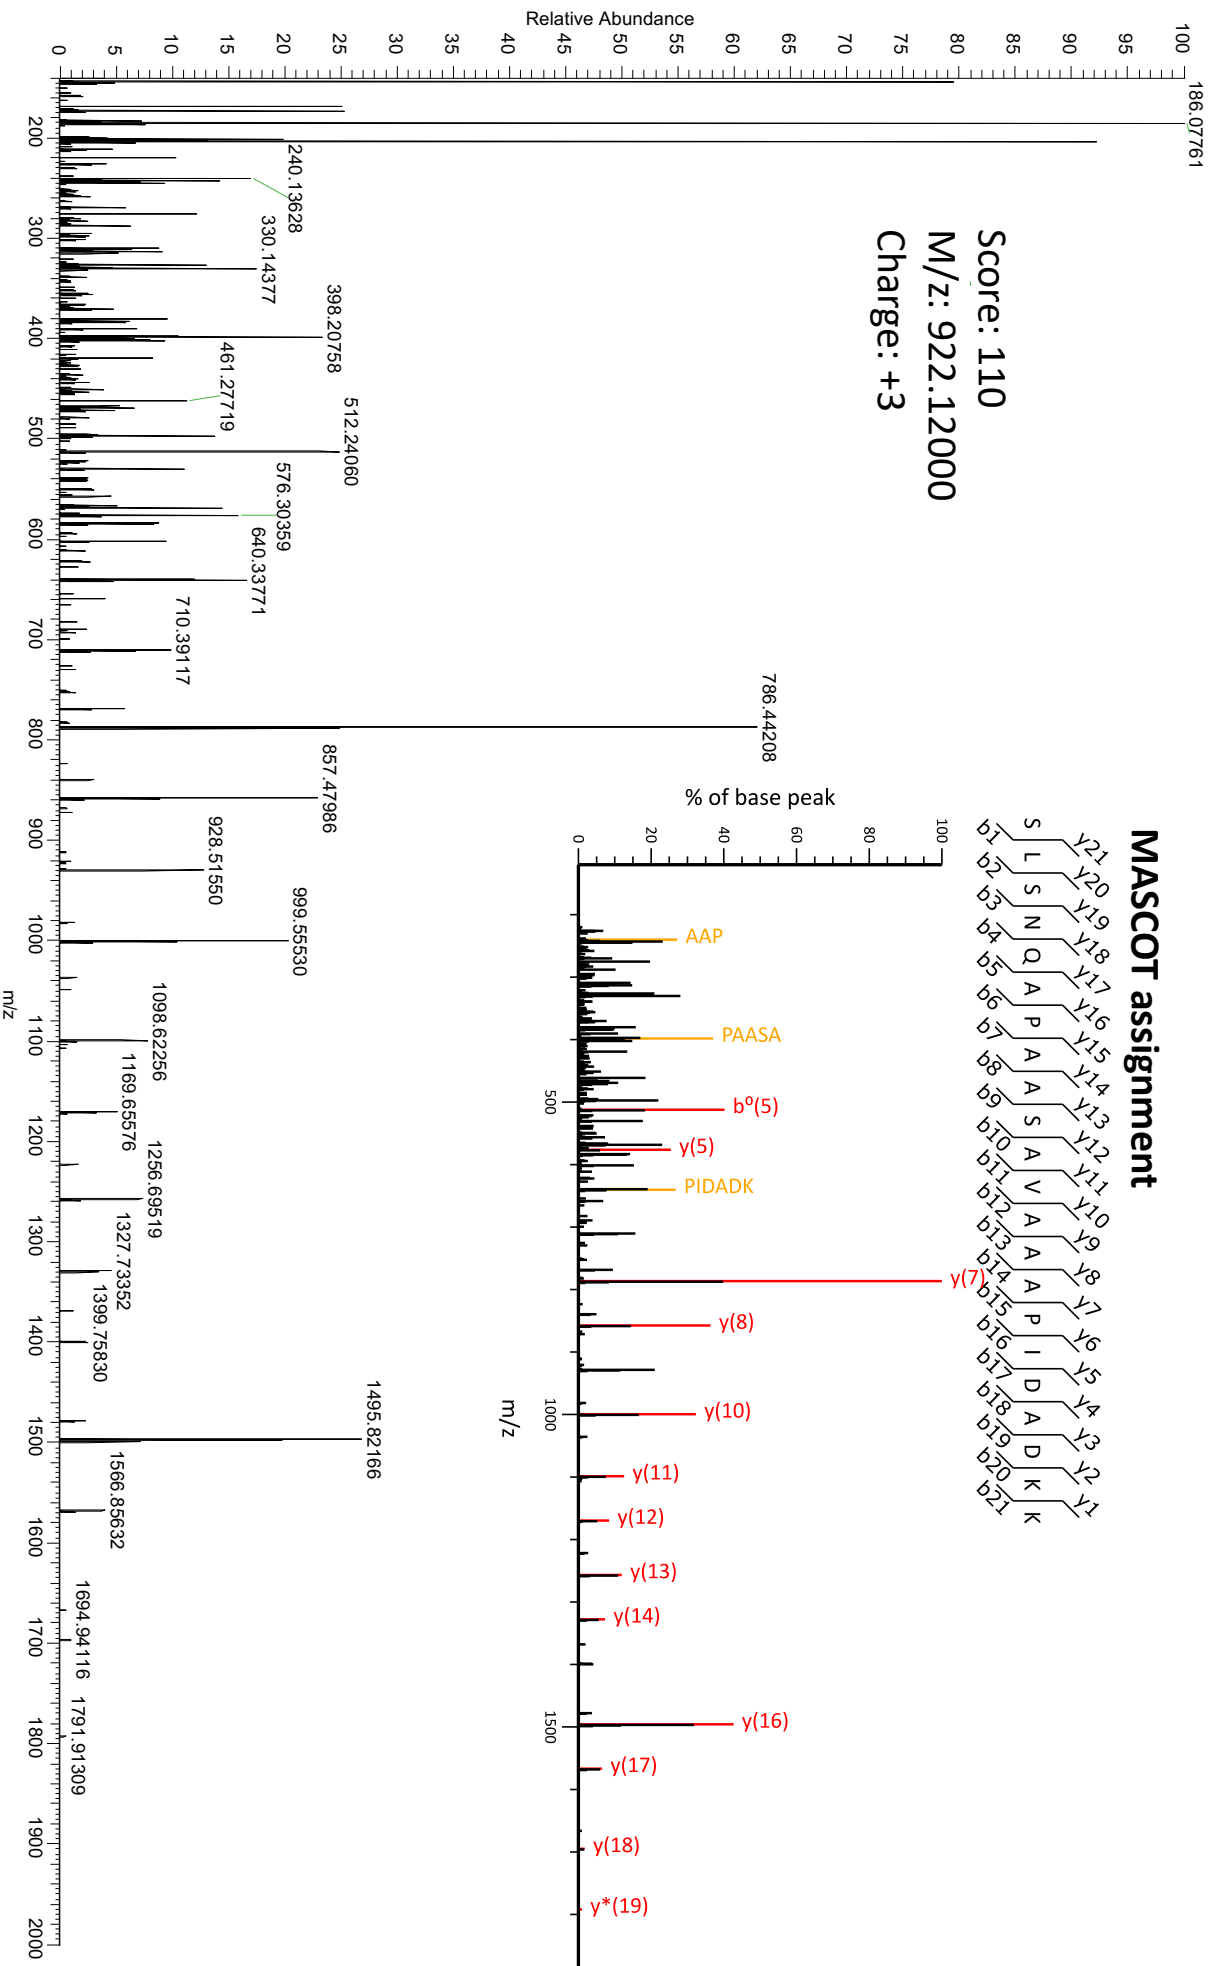

### MASCOT assignment

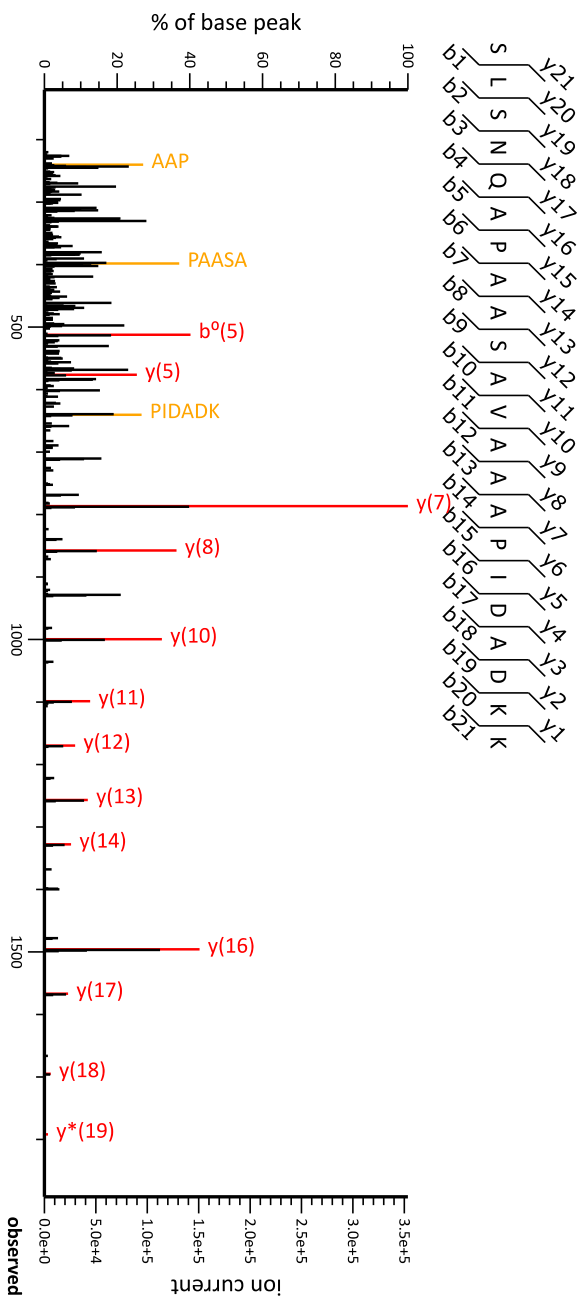

ITMS-CID

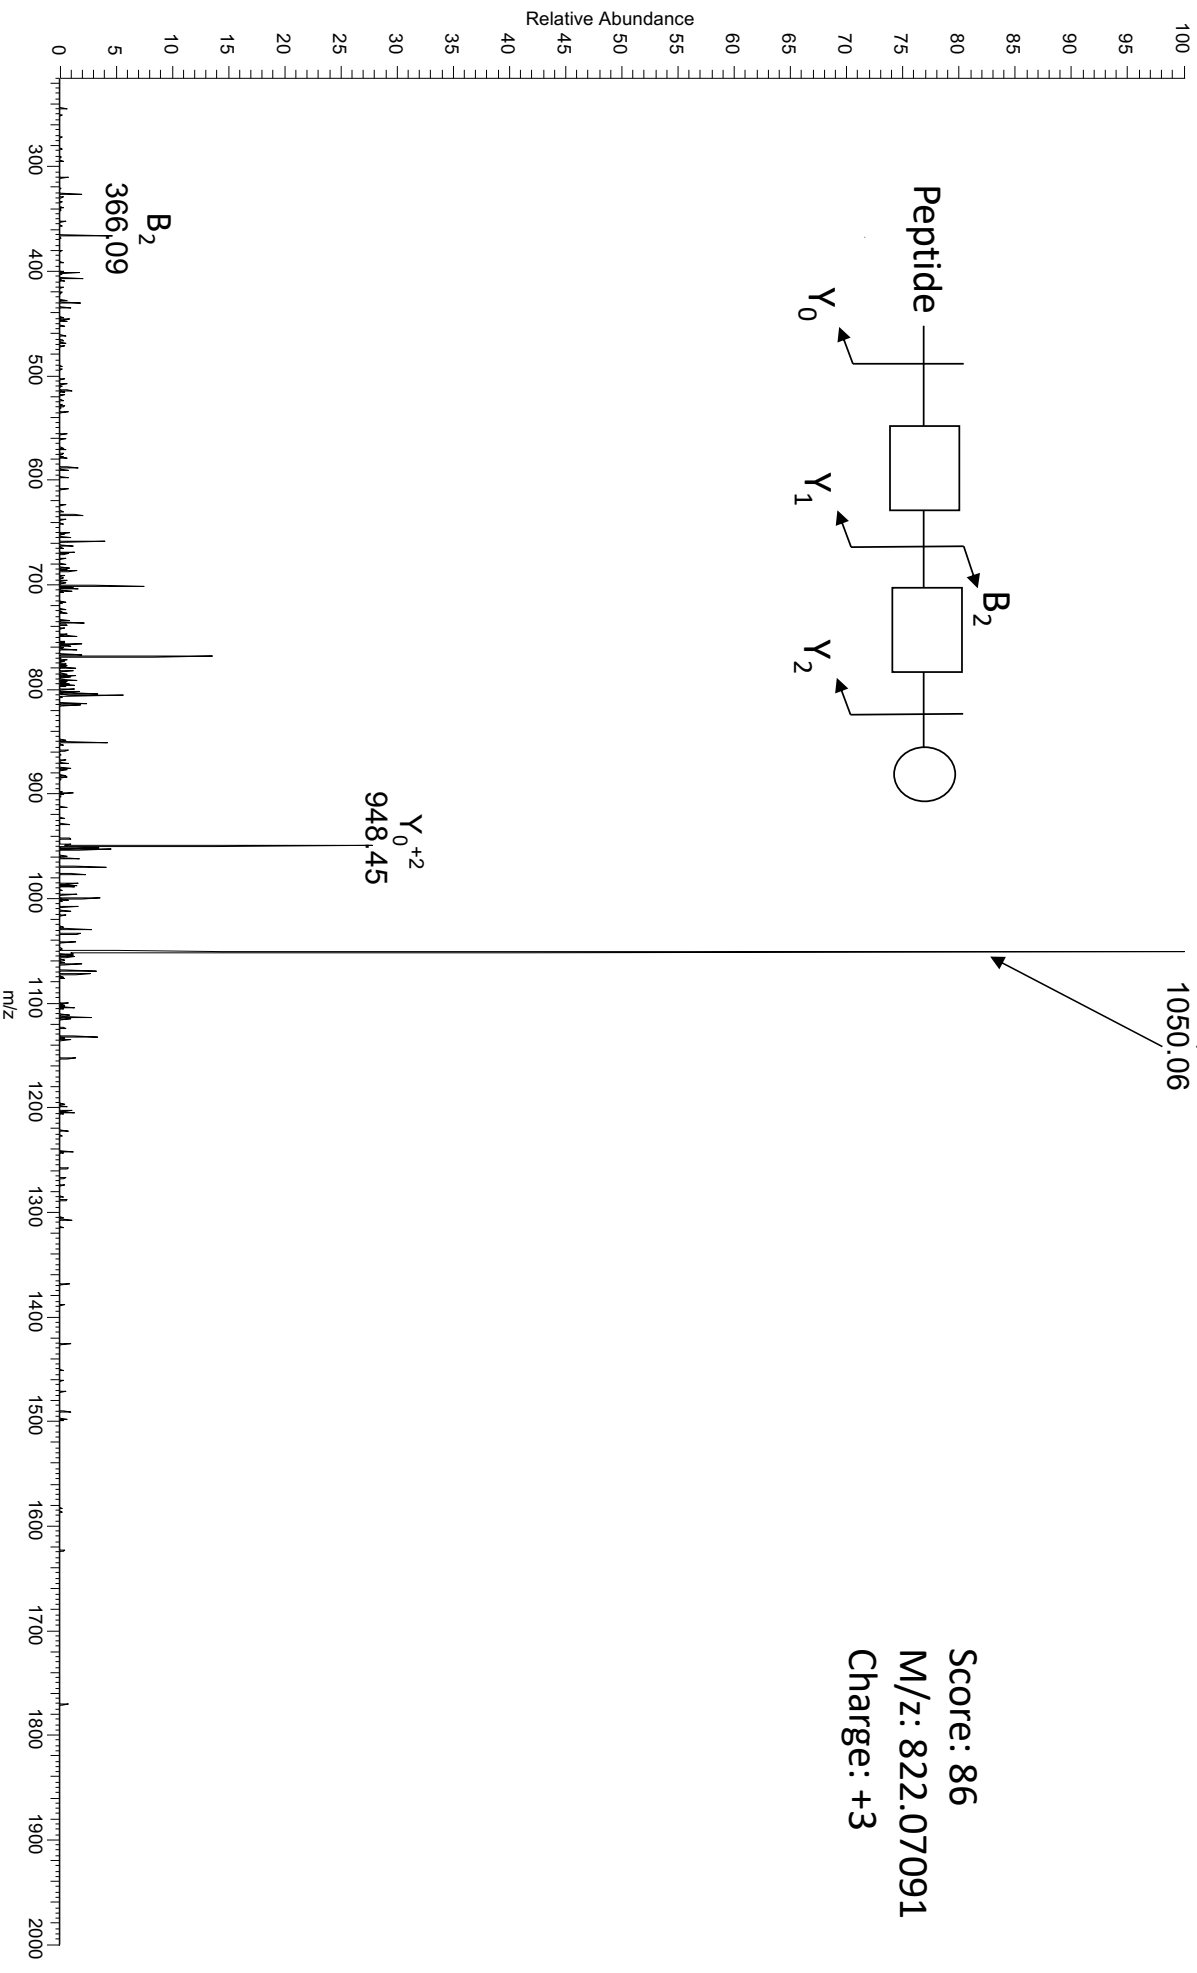

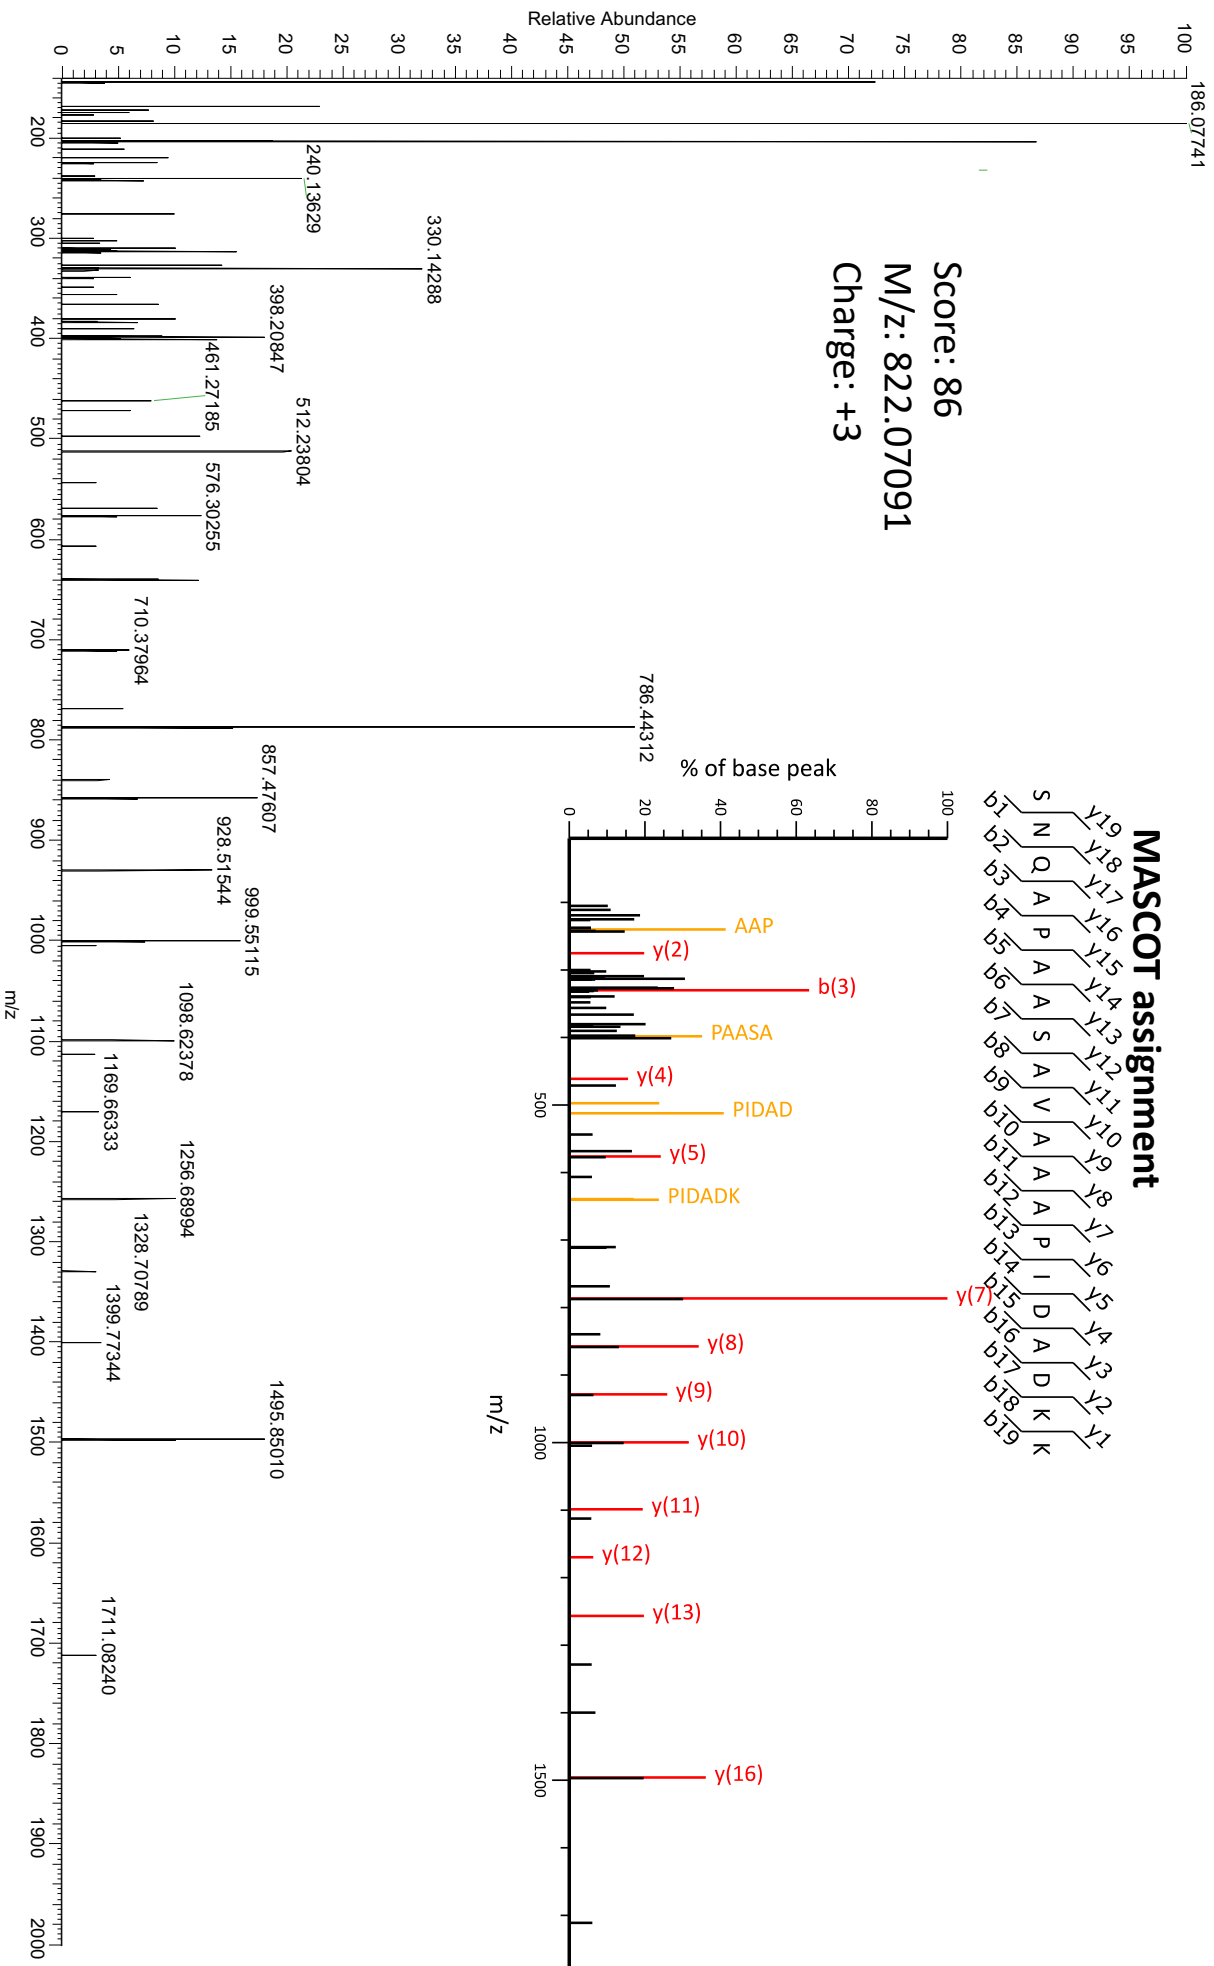

MASCOT assignment

- S
- N
- Q
- A
- P
- A
- A
- S
- A
- V
- A
- A
- A
- P
- I
- D
- A
- D
- K
- K
- y19
- y18
- y17
- y16
- y15
- y14
- y13
- y12
- y11
- y10
- y9
- y8
- y7
- y6
- y5
- y4
- y3
- y2
- y1
- b1
- b2
- b3
- b4
- b5
- b6
- b7
- b8
- b9
- b10
- b11
- b12
- b13
- b14
- b15
- b16
- b17
- b18
- b19

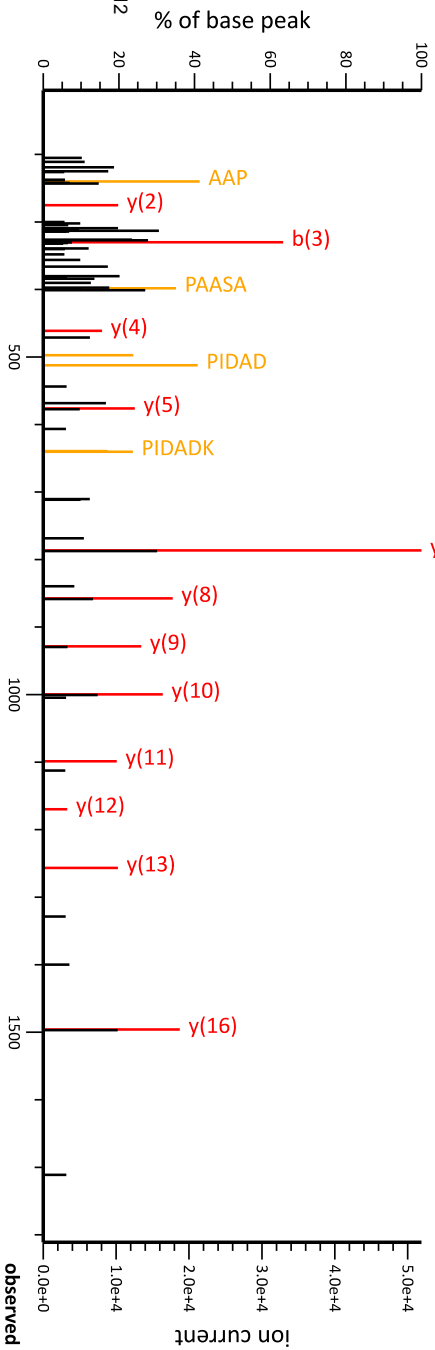

observed



ITMS-CID

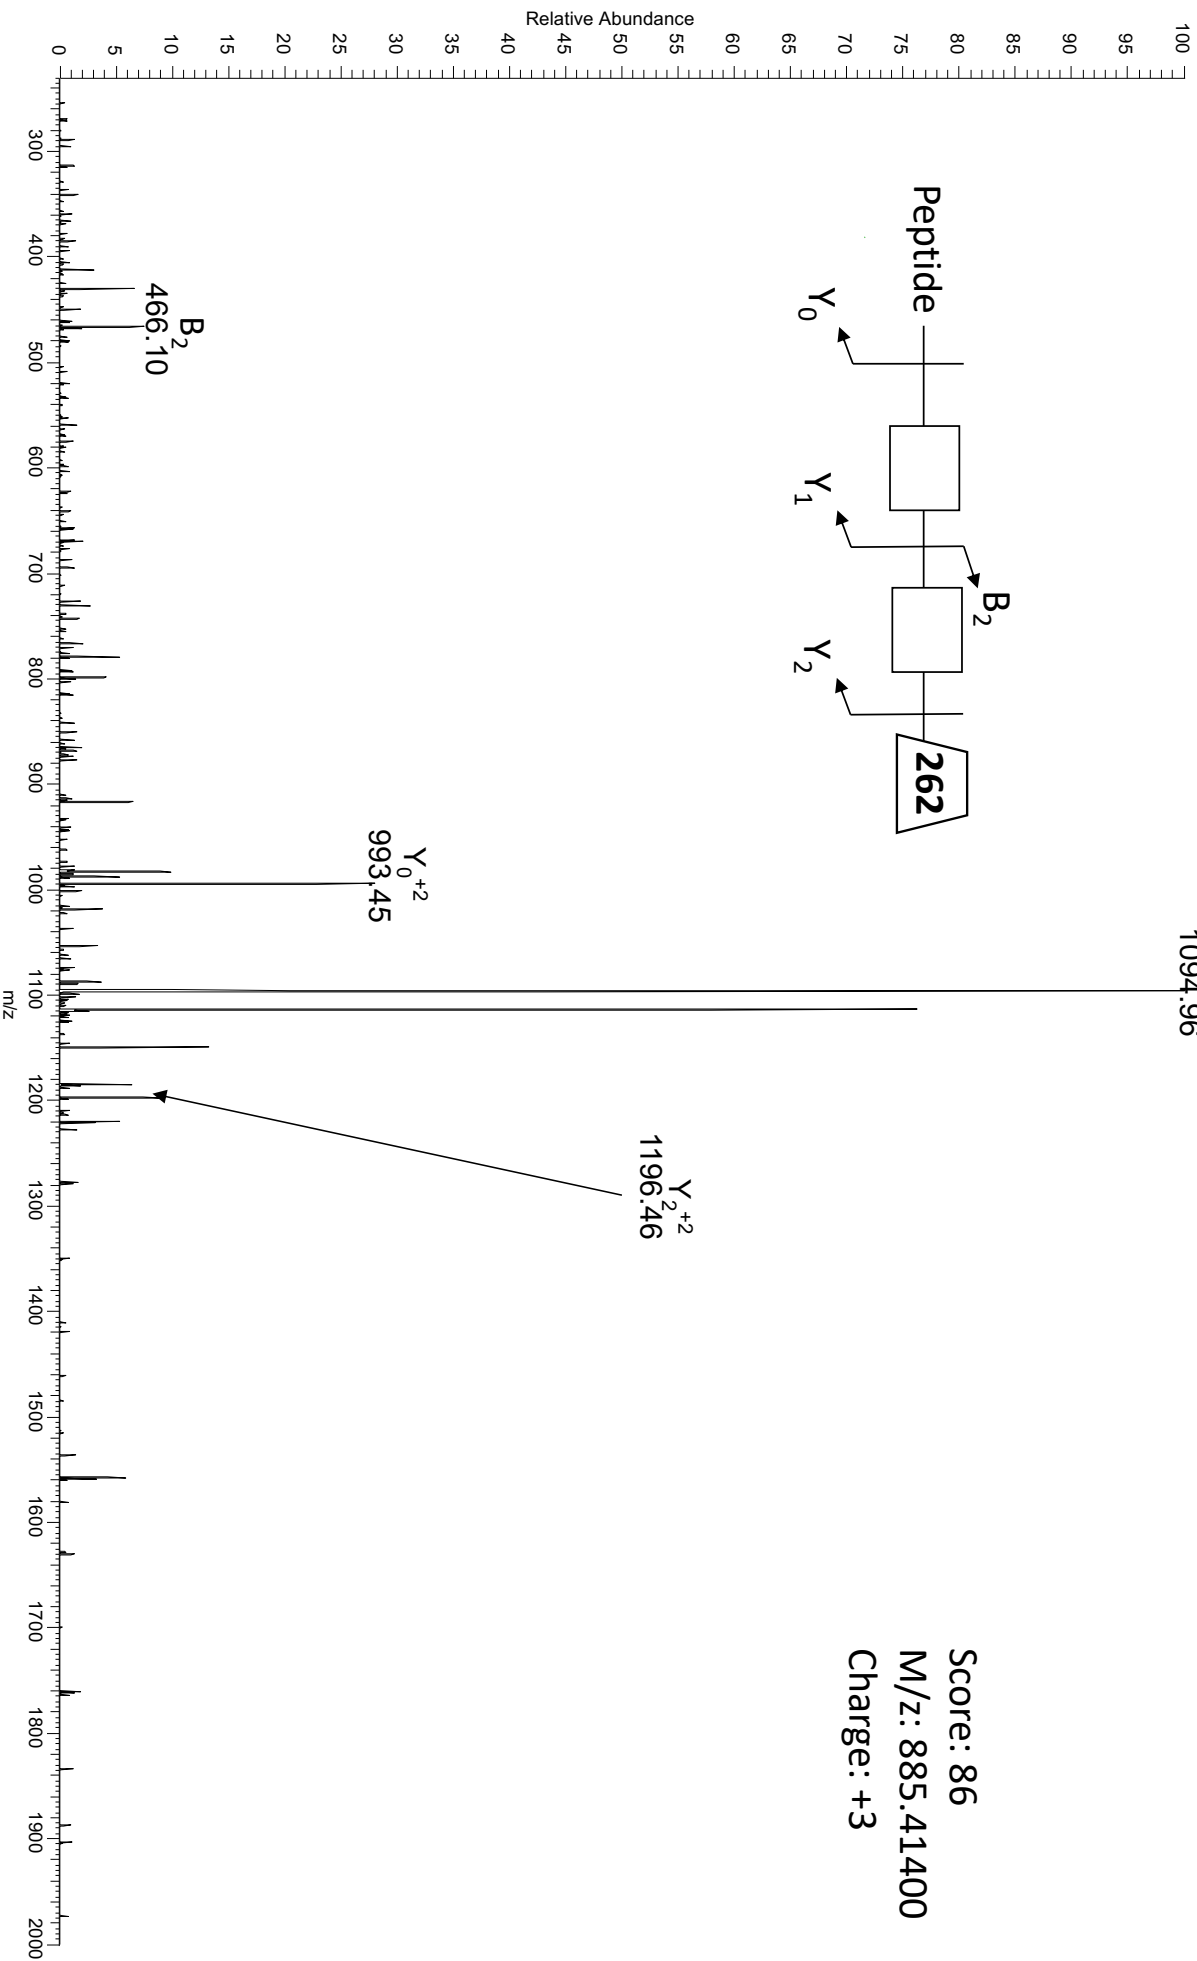

### MASCOT assignment

T D A A A P G A D A A A A A S T P T K A E K  
Y21 Y20 Y19 Y18 Y17 Y16 Y15 Y14 Y13 Y12 Y11 Y10 Y9 Y8 Y7 Y6 Y5 Y4 Y3 Y2 Y1  
b1 b2 b3 b4 b5 b6 b7 b8 b9 b10 b11 b12 b13 b14 b15 b16 b17 b18 b19 b20 b21

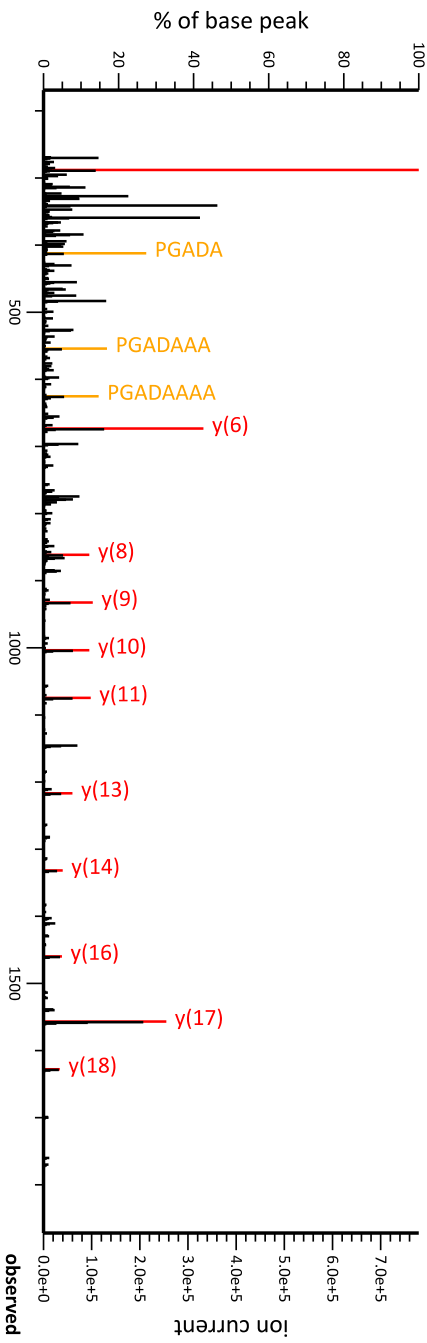

Score: 86  
M/z: 885.41400  
Charge: +3

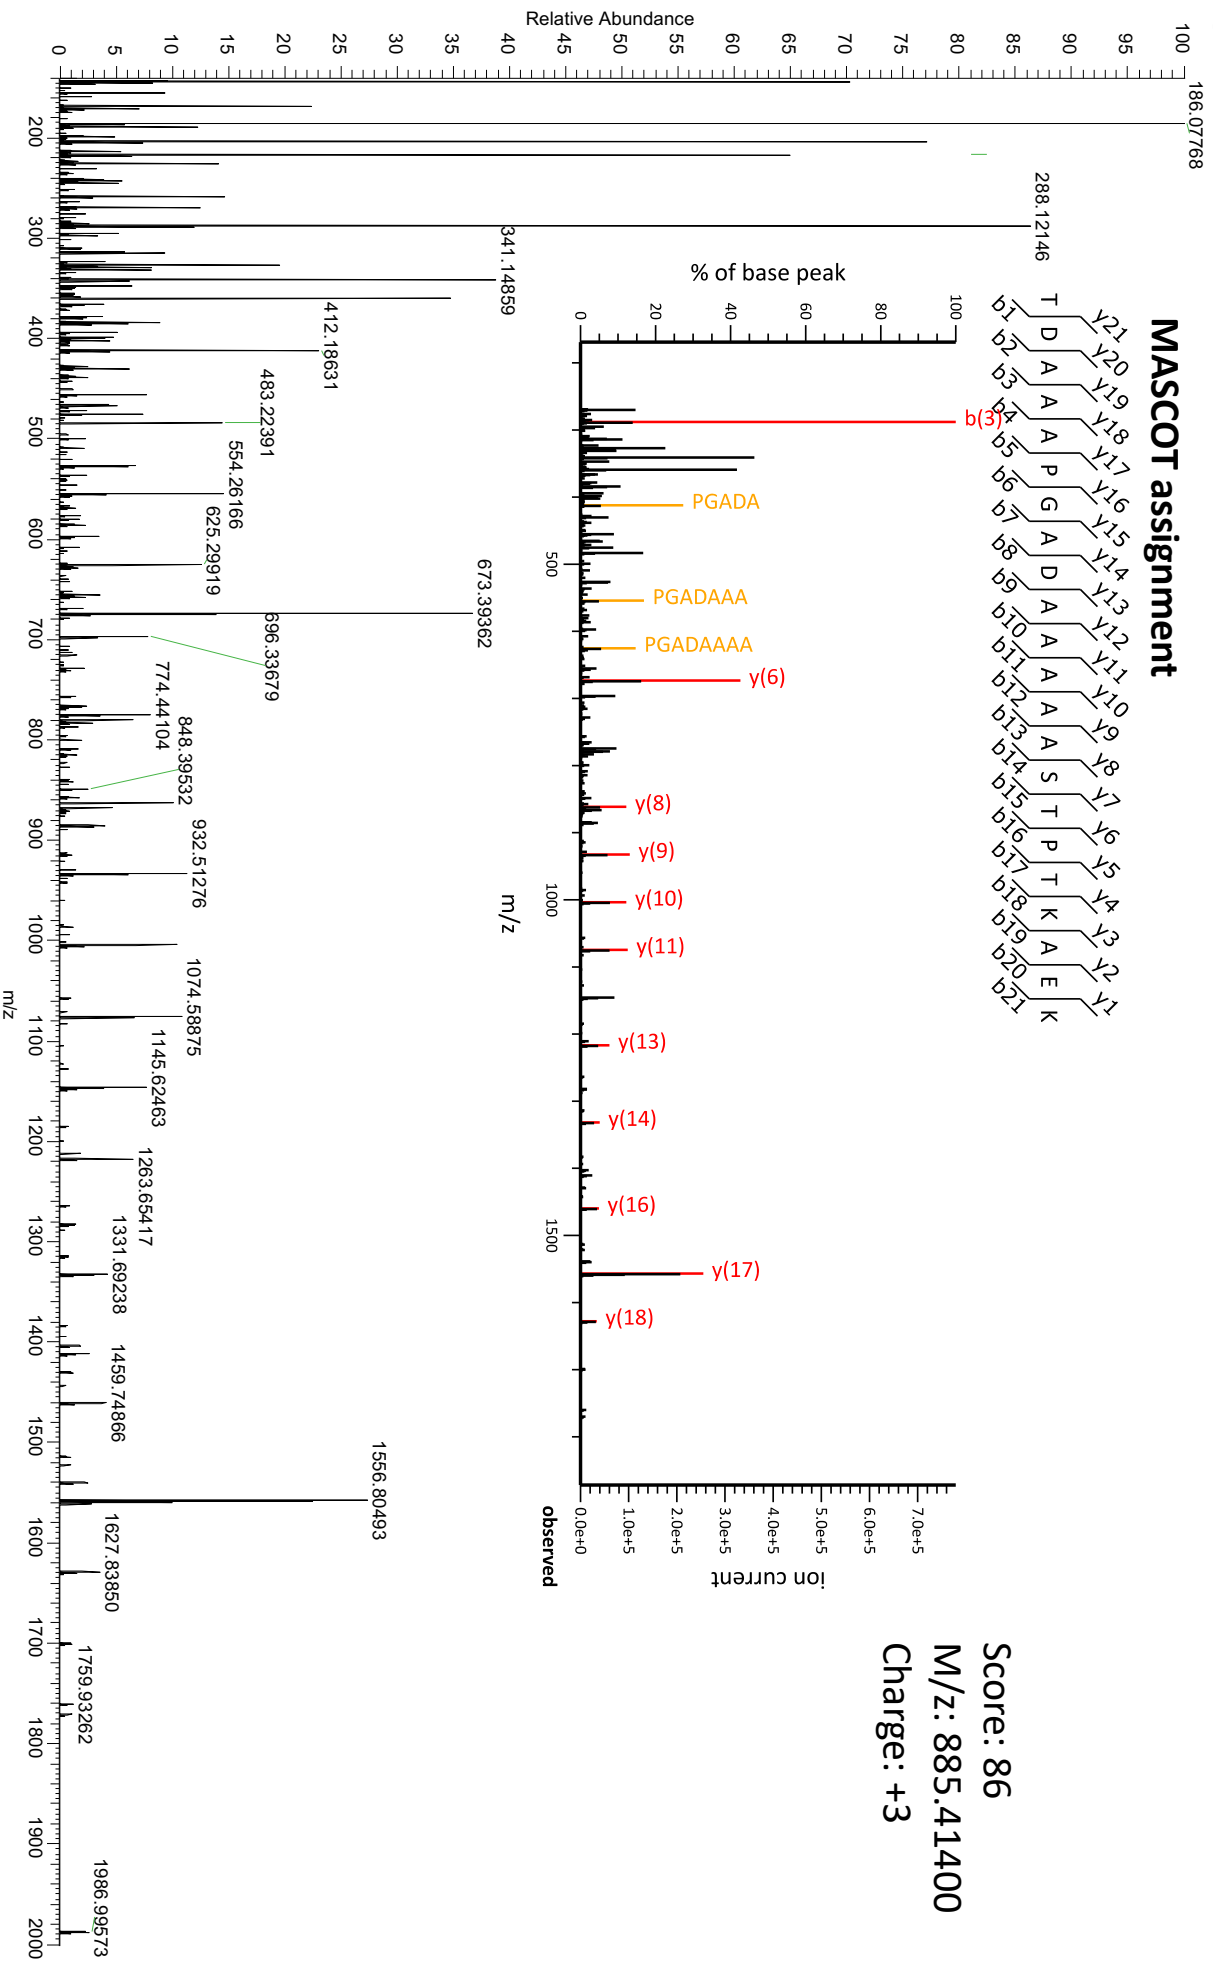

ITMS-CID

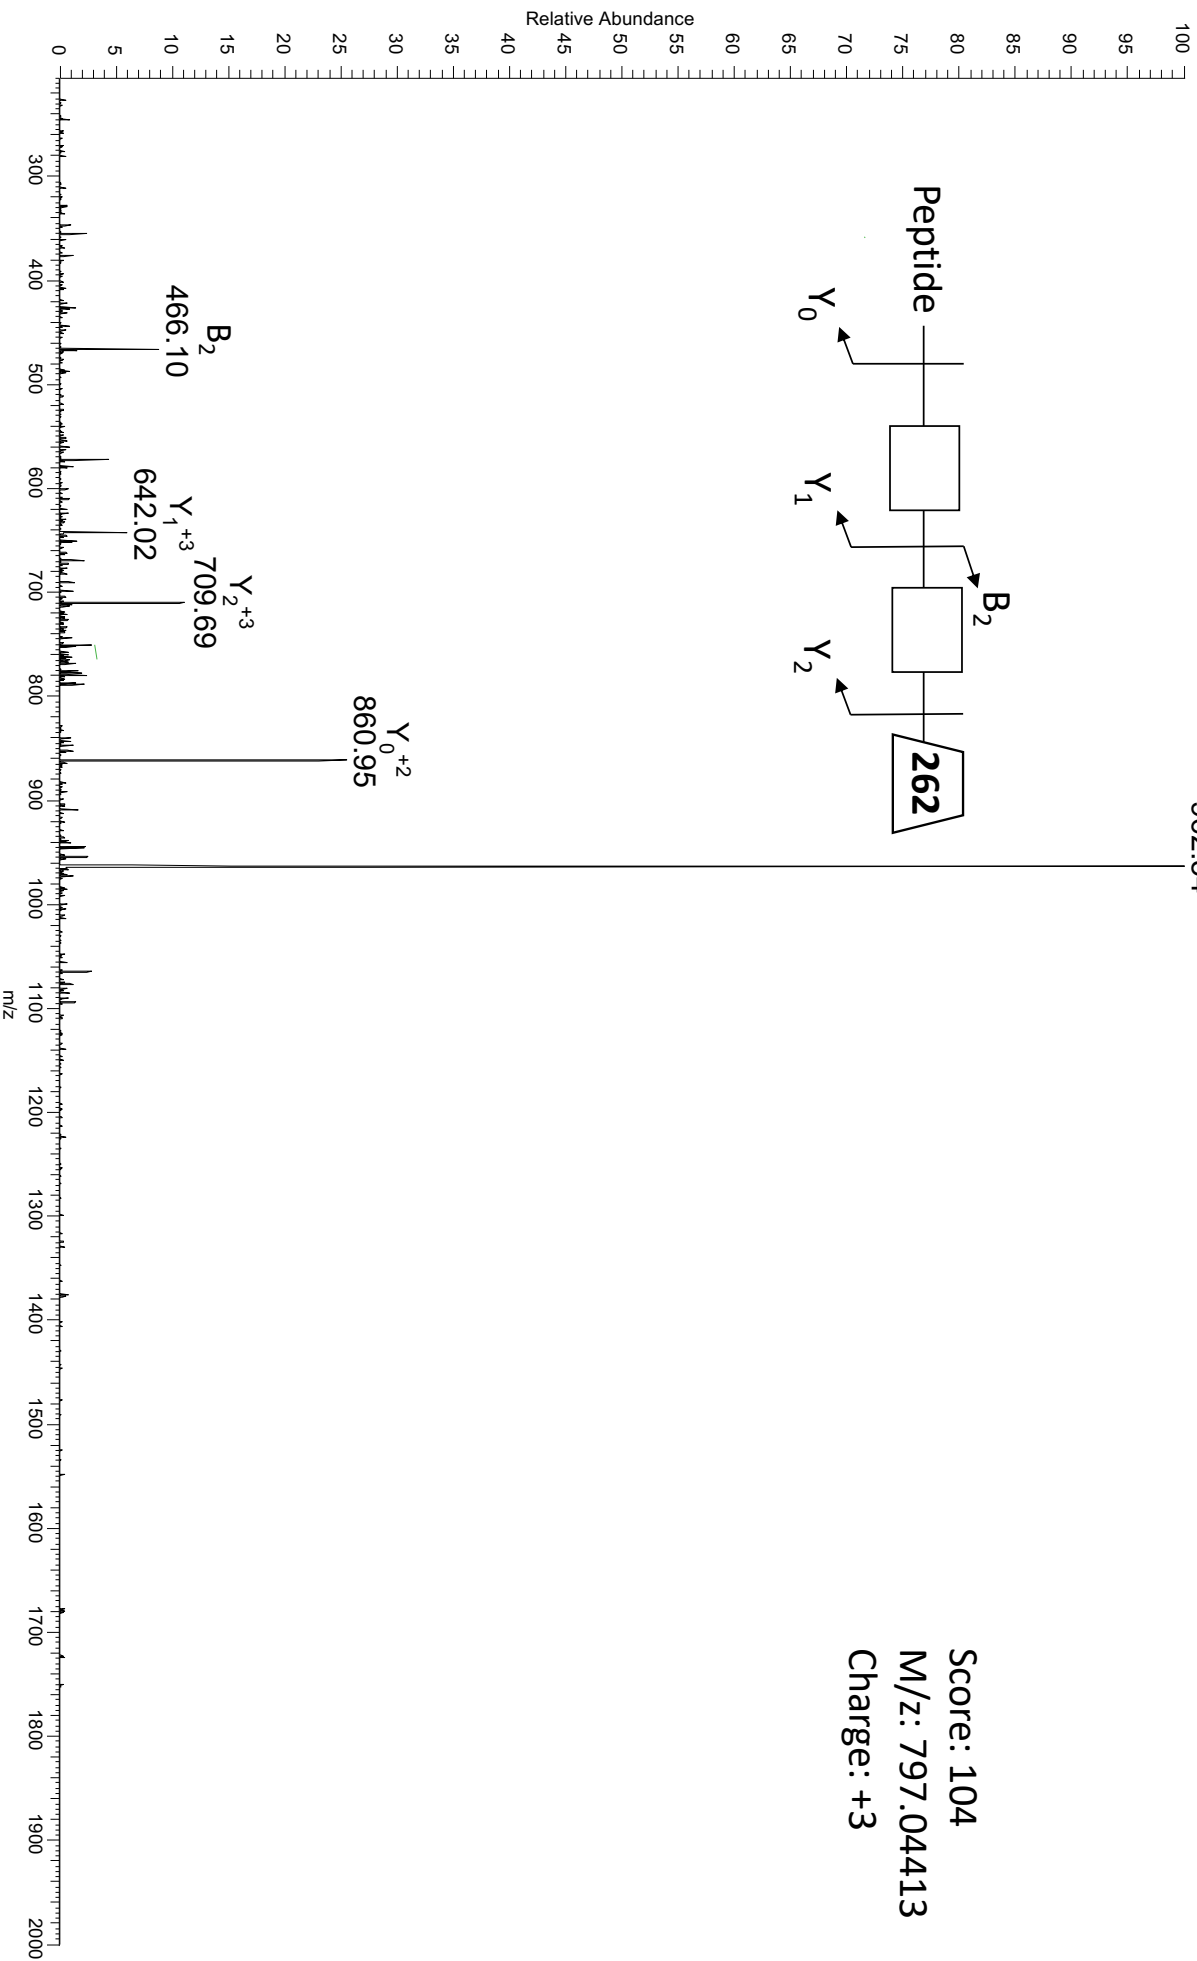

Score: 104  
M/z: 797.04413  
Charge: +3

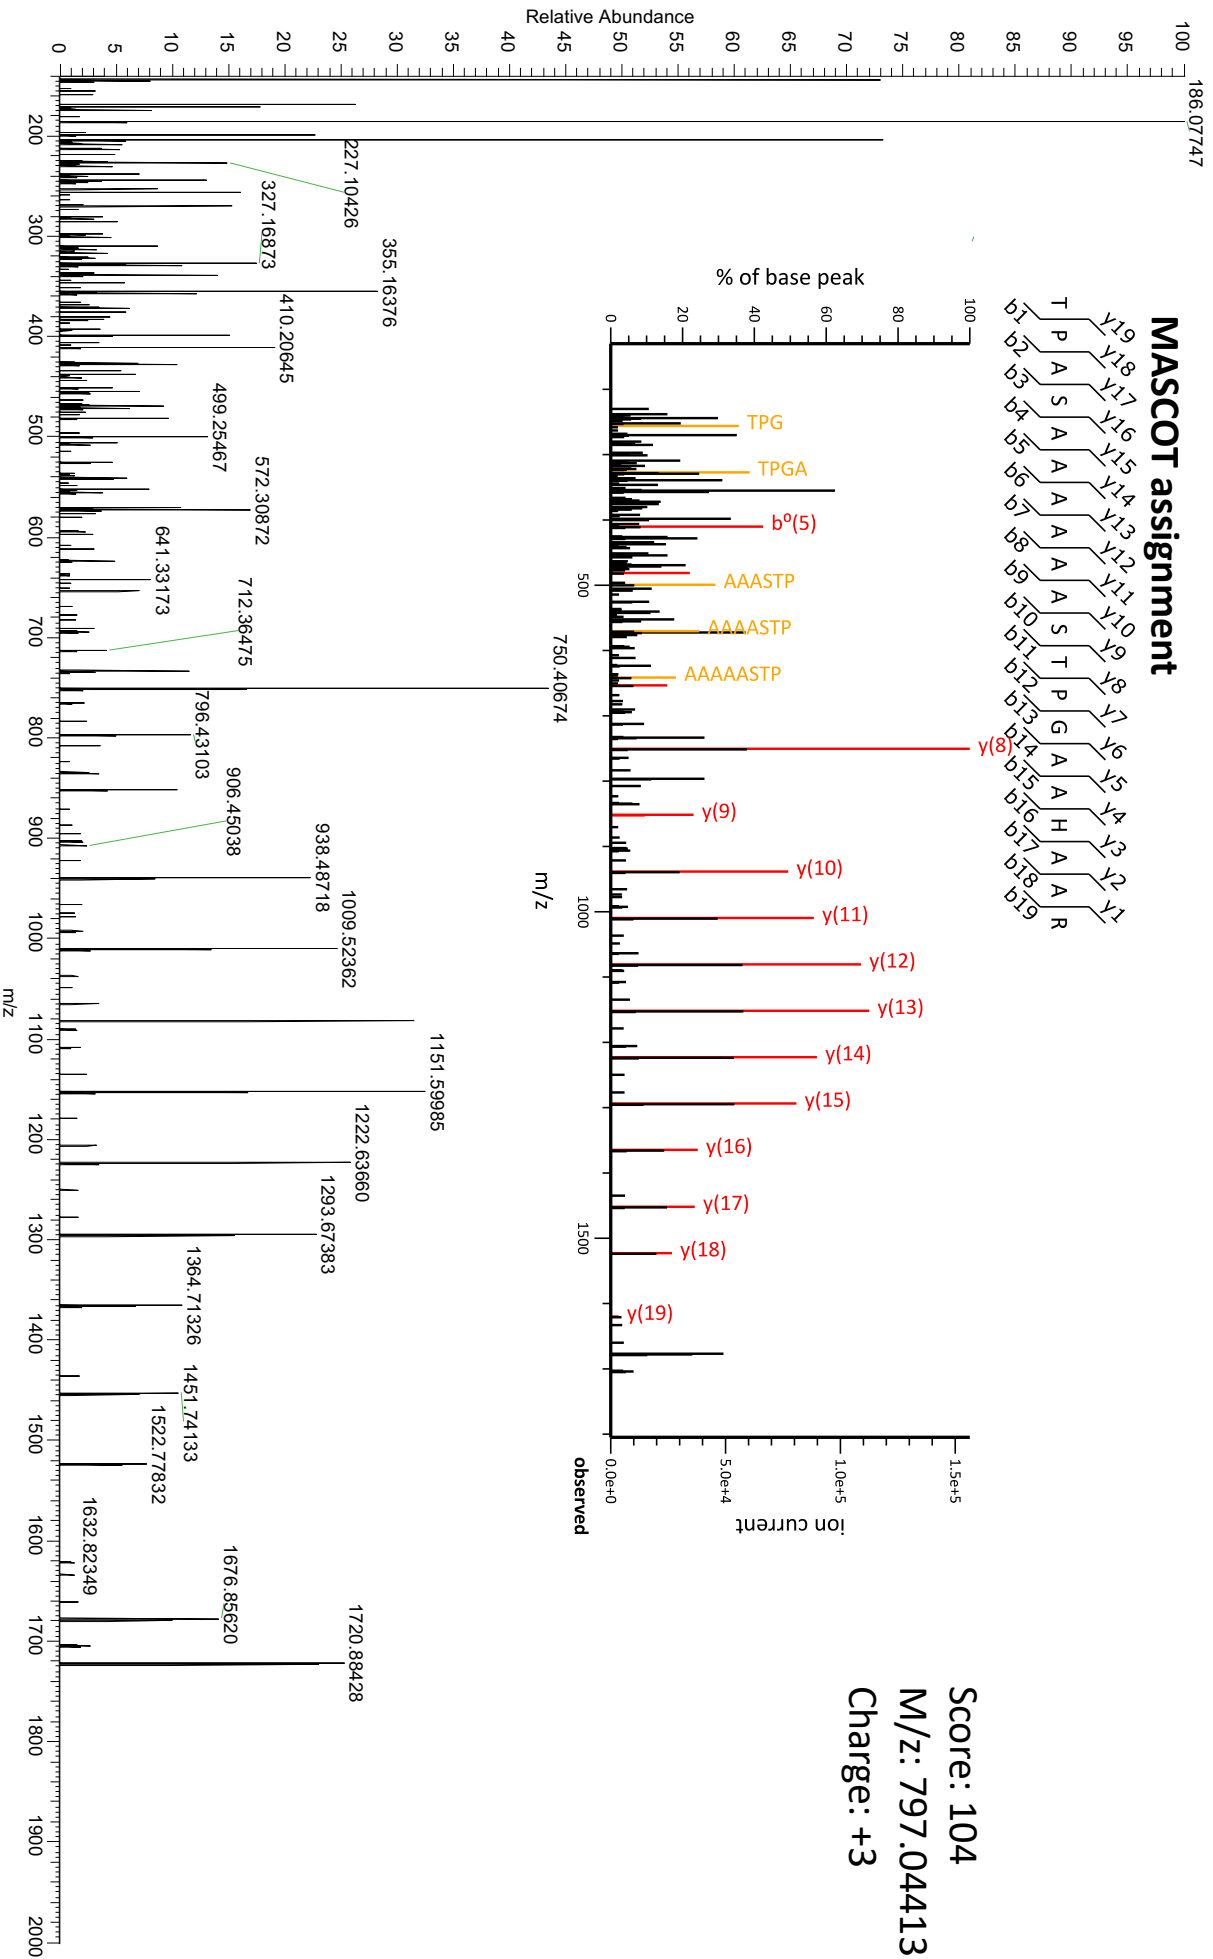

### MASCOT assignment

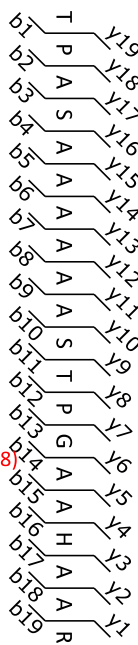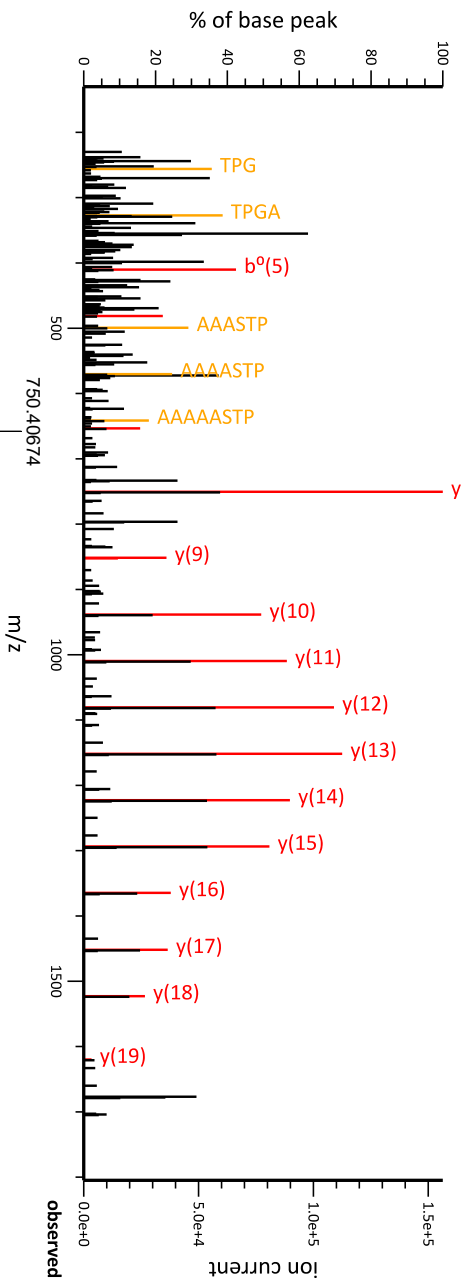

Score: 104  
M/z: 797.04413  
Charge: +3
