# Supplementary material
Source: PubMed Central journal article supplement (PMC6737235)
Supplement: supp_RA119.009671_153342_2_supp_366583_pv1sjl.pdf [file supp_RA119.009671_153342_2_supp_366583_pv1sjl.pdf]

## SUPPORTING INFORMATION

A general protein *O*-glycosylation machinery conserved in *Burkholderia* species improves bacterial fitness and provides glycan immunogenicity in humans

**Yasmine Fathy Mohamed, Nichollas E. Scott, Antonio Molinaro, Carole Creuzenet, Ximena Ortega, Ganjana Lertmemongkolchai, Michael M. Tunney, Heather Green, Andrew M. Jones, David DeShazer, Bart J. Currie, Leonard J. Foster, Rebecca Ingram, Cristina De Castro, and Miguel A. Valvano\***

### **Content**

Table S1

Table S2

Table S3

Figure S1

Figure S2

Figure S3

Figure S4

Figure S5

Figure S6

Figures S7

Description of Supplementary Data files S1 to S6

**Table 1.** <sup>1</sup>H (plain) and <sup>13</sup>C (italic) chemical shifts of the NMR spectra acquired at 600 MHz, at 15°C in D<sub>2</sub>O, for the glycopeptides from DsbA after Proteinase K digestion and chromatographic purification. The methyl signals of the acetyls of the two GalNAc residues were at 2.08 and 2.01 ppm.

|                    | <b>1</b>     | <b>2</b>    | <b>3</b>    | <b>4</b>    | <b>5</b>    | <b>6,6'</b> |
|--------------------|--------------|-------------|-------------|-------------|-------------|-------------|
| <b>A</b>           | 5.07         | 4.38        | 3.82        | 4.23        | 3.85        | 3.76 x 2    |
| <b>3)-α-GalNAc</b> | <i>94.5</i>  | <i>51.0</i> | <i>79.1</i> | <i>69.4</i> | <i>72.2</i> | <i>61.7</i> |
| <b>B</b>           | 4.62         | 4.11        | 3.83        | 4.14        | 3.67        | 3.82 x 2    |
| <b>3)-β-GalNAc</b> | <i>101.7</i> | <i>52.0</i> | <i>75.8</i> | <i>64.6</i> | <i>76.4</i> | <i>62.2</i> |
| <b>C</b>           | 4.45         | 3.51        | 3.64        | 3.96        | 3.90        | 4.31;4.23   |
| <b>t-β-Gal</b>     | <i>106.3</i> | <i>71.6</i> | <i>73.4</i> | <i>69.4</i> | <i>73.1</i> | <i>64.4</i> |

**Table S2**

| m/z of most intense ion               | 1353.6985          | 1421.39         | 1489.086667     | 1464.74658         | 1157.57959              | 1182.58154              |
|---------------------------------------|--------------------|-----------------|-----------------|--------------------|-------------------------|-------------------------|
| Extracted ion chromatograms m/z range | 1353.69-1353.72    | 1421.38-1421.41 | 1489.07-1489.10 | 1464.72-1464.75    | 1157.56-1157.59         | 1182.57-1182.60         |
| Strain/Data file                      | Unmodified peptide | Peptide+HexNAc  | Peptide+HexNAc2 | Peptide+QuiNAc-Rha | complete glycans form A | complete glycans form B |
| Nsco_BC_k562_WT_DsbA1                 | 5694171            | 378957          | 73850           | 78417              | 67106443                | 80854183                |
| Nsco_BC_k562_ΔpglL_DsbA1              | 49794099           | 100             | 33659           | 53826              | 6911                    | 100                     |
| Nsco_BC_k562_Δogc_DsbA1               | 227191060          | 9573            | 198576          | 44420514           | 100755                  | 42680                   |
| Nsco_BC_k562_ΔogcX_DsbA1              | 287304020          | 29810476        | 143444          | 2433825            | 32169                   | 49652                   |
| Nsco_BC_k562_ΔogcI_DsbA1              | 274272635          | 73564           | 285542          | 2119523            | 14443                   | 100                     |
| Nsco_BC_k562_ΔogcAB_DsbA1             | 246683625          | 128284289       | 11378           | 1744402            | 224497                  | 20083                   |
| Nsco_BC_k562_ΔogcE_DsbA1              | 17269199           | 100             | 100             | 265201             | 1063190                 | 739204                  |

\*Note in cases where no ion of interest was detected a value of 100 has been recorded

| as a %                    | Unmodified peptide | Peptide+HexNAc | Peptide+HexNAc2 | Peptide+QuiNAc-Rha | complete glycans form A | complete glycans form B |
|---------------------------|--------------------|----------------|-----------------|--------------------|-------------------------|-------------------------|
| Nsco_BC_k562_WT_DsbA1     | 3.69               | 0.25           | 0.05            | 0.05               | 43.52                   | 52.44                   |
| Nsco_BC_k562_ΔpglL_DsbA1  | 99.81              | 0.00           | 0.07            | 0.11               | 0.01                    | 0.00                    |
| Nsco_BC_k562_Δogc_DsbA1   | 83.54              | 0.00           | 0.07            | 16.33              | 0.04                    | 0.02                    |
| Nsco_BC_k562_ΔogcX_DsbA1  | 89.85              | 9.32           | 0.04            | 0.76               | 0.01                    | 0.02                    |
| Nsco_BC_k562_ΔogcI_DsbA1  | 99.10              | 0.03           | 0.10            | 0.77               | 0.01                    | 0.00                    |
| Nsco_BC_k562_ΔogcAB_DsbA1 | 65.44              | 34.03          | 0.00            | 0.46               | 0.06                    | 0.01                    |
| Nsco_BC_k562_ΔogcE_DsbA1  | 89.31              | 0.00           | 0.00            | 1.37               | 5.50                    | 3.82                    |

**Table S3. Bacterial strains and plasmids**

| Strain or plasmid                        | Description <sup>a</sup>                                                                                                                                                                                                                                                     | Source/reference   |
|------------------------------------------|------------------------------------------------------------------------------------------------------------------------------------------------------------------------------------------------------------------------------------------------------------------------------|--------------------|
| <b><i>E. coli</i></b>                    |                                                                                                                                                                                                                                                                              |                    |
| DH5 $\alpha$                             | F <sup>-</sup> $\phi$ 80 <i>lacZ</i> $\Delta$ M15 <i>endA recA hsdR17</i> (r <sup>-</sup> km <sup>+</sup> κ)                                                                                                                                                                 | Lab stock          |
| GT115                                    | <i>supE thi-1</i> $\Delta$ <i>gyrA</i> ( $\Delta$ <i>lacZYA-argF</i> )U169 <i>relA1F<sup>-</sup></i><br><i>mcrA</i> $\Delta$ ( <i>mrr-hsdRMS-mcrBC</i> ) $\phi$ 80 <i>lacZ</i> $\Delta$ M15<br><i>ΔlacX74 recA1 rpsL endA1 Δdcm uidA(ΔMluI)::pir-116</i><br><i>ΔsbC-sbcD</i> |                    |
| <b><i>B. cenocepacia</i></b>             |                                                                                                                                                                                                                                                                              |                    |
| K56-2                                    | Clinical isolate, ET12 clone related to J2315                                                                                                                                                                                                                                | BCRRC <sup>b</sup> |
| MSS49                                    | K56-2; $\Delta$ <i>pglL</i> (BCAL0960)                                                                                                                                                                                                                                       | Lab stock          |
| YFM35                                    | K56-2; $\Delta$ <i>ogcE</i> (BCAM3117)                                                                                                                                                                                                                                       | This study         |
| YFM36                                    | K56-2; $\Delta$ <i>ogcAB</i> (BCAL3115-BCAL3116)                                                                                                                                                                                                                             | This study         |
| NS001                                    | K56-2; $\Delta$ <i>ogcB</i> (BCAL3116)                                                                                                                                                                                                                                       | This study         |
| XOA25                                    | K56-2; $\Delta$ <i>ogc</i> (BCAL3114-BCAL3118)                                                                                                                                                                                                                               | This study         |
| XOA30                                    | K56-2; $\Delta$ <i>ogcX</i> (BCAL3114)                                                                                                                                                                                                                                       | This study         |
| XOA31                                    | K56-2; $\Delta$ <i>ogcI</i> (BCAL3118)                                                                                                                                                                                                                                       | This study         |
| MV4179                                   | K56-2; $\Delta$ O-Antigen cluster (BCAL3119-BCAL3131)                                                                                                                                                                                                                        | Lab stock          |
| <b>Other <i>Burkholderia</i> species</b> |                                                                                                                                                                                                                                                                              |                    |
| <i>B. thailandensis</i> e264             | American Type Culture Collection isolate 700388                                                                                                                                                                                                                              | ATCC               |
| <i>B. gladioli</i> MDU1                  | Clinical isolate AUSMDU00013928 from the Victorian Infectious Diseases Reference Laboratory                                                                                                                                                                                  | This study         |
| <i>B. gladioli</i> MDU2                  | Clinical isolate AUSMDU00013929 from the Victorian Infectious Diseases Reference Laboratory                                                                                                                                                                                  | This study         |
| <i>B. pseudomallei</i> NT1               | Clinical isolate MSHR 831                                                                                                                                                                                                                                                    | This study         |
| <i>B. pseudomallei</i> NT2               | Clinical isolate MSHR 1967                                                                                                                                                                                                                                                   | This study         |
| <i>B. pseudomallei</i> NT3               | Clinical isolate MSHR 1824                                                                                                                                                                                                                                                   | This study         |
| <i>B. pseudomallei</i> NT4               | Clinical isolate MSHR 715                                                                                                                                                                                                                                                    | This study         |
| <i>B. pseudomallei</i> NT5               | Clinical isolate MSHR 8582                                                                                                                                                                                                                                                   | This study         |
| <i>B. pseudomallei</i> NT6               | Clinical isolate MSHR 9219                                                                                                                                                                                                                                                   | This study         |
| <i>B. pseudomallei</i> NT7               | Clinical isolate MSHR 9138                                                                                                                                                                                                                                                   | This study         |
| <i>B. pseudomallei</i> NT8               | Clinical isolate MSHR 9443                                                                                                                                                                                                                                                   | This study         |
| <b>Plasmids</b>                          |                                                                                                                                                                                                                                                                              |                    |
| pGPISce-I                                | <i>ori</i> <sub>R6K</sub> , <i>mob</i> <sup>+</sup> , $\Omega$ Tp <sup>R</sup> , including an ISce-I restriction site                                                                                                                                                        | (52)               |
| pDAI-SceI-SacB                           | <i>ori</i> <sub>pBBR1</sub> , Tet <sup>R</sup> , P <sub>dhfr</sub> , <i>mob</i> <sup>+</sup> , expressing ISce-I and the negative selection marker SacB                                                                                                                      | M. Hamad           |
| pDA12                                    | Cloning vector, <i>ori</i> <sub>pBBR1</sub> , Tet <sup>R</sup> , <i>mob</i> <sup>+</sup> , P <sub>dhfr</sub>                                                                                                                                                                 | D. Aubert          |
| pRK2013                                  | <i>ori</i> <sub>colE1</sub> , RK2 derivative, Kan <sup>R</sup> , <i>mob</i> <sup>+</sup> , <i>tra</i> <sup>+</sup>                                                                                                                                                           | (52)               |
| pYM4                                     | pGPI-SceI with fragments flanking BCAL1907                                                                                                                                                                                                                                   | This study         |
| pYM36                                    | pGPI-SceI with fragments flanking <i>ogcE</i>                                                                                                                                                                                                                                | This study         |
| pYM37                                    | pGPI-SceI with fragments flanking <i>ogcAB</i>                                                                                                                                                                                                                               | This study         |
| pYM38                                    | C- 6x His-tagged BCAL2640 cloned into pDA12, Tet <sup>R</sup>                                                                                                                                                                                                                | This study         |
| pYM39                                    | <i>ogcE</i> cloned in pET28a with N-6x His-Tag, Kn <sup>R</sup>                                                                                                                                                                                                              | This study         |
| pXO23                                    | <i>ogcE</i> cloned into pAP20, Cm <sup>R</sup>                                                                                                                                                                                                                               | This study         |
| pXO51                                    | pGPI-SceI with fragments flanking <i>ogcX</i>                                                                                                                                                                                                                                | This study         |
| pXO52                                    | pGPI-SceI with fragments flanking <i>ogcI</i>                                                                                                                                                                                                                                | This study         |
| pXO49                                    | pGPI-SceI with fragments flanking <i>ogcX-ogcI</i>                                                                                                                                                                                                                           | This study         |
| pNS01                                    | pGPI-SceI with fragments flanking <i>ogcB</i>                                                                                                                                                                                                                                | This study         |
| pAMF22                                   | C-10x His-tagged DsbA1 from <i>N. meningitidis</i> MC58 cloned into pMLBAD, Tp <sup>R</sup>                                                                                                                                                                                  | (28)               |

<sup>a</sup>Tp<sup>R</sup>, trimethoprim resistance, Tet<sup>R</sup>, tetracycline resistance, Cm<sup>R</sup>, Chloramphenicol resistance and Kn<sup>R</sup>, Kanamycin resistance. <sup>b</sup>BCRRC, *B. cepacia* Research and Referral Repository for Canadian CF Clinics.

**Table S4. Primers**

| Primer number | Oligonucleotide sequence, 5'-3'                            | Restriction enzyme |
|---------------|------------------------------------------------------------|--------------------|
| Q539          | TTTTTTCATATG ccgctcgagtactctcgactg                         | NdeI               |
| Q540          | TTTTTCTAGAtttaGTGGTGGTGGTGGTGGTGGT cgggttccggccgtctccgacag | XbaI               |
| Q653          | TTTTCTAGAgctcgtgctgccgctgtac                               | XbaI               |
| Q654          | TTTTCTCGAGcttgctgttgacgaggtgt                              | XhoI               |
| Q655          | TTTTCTCGAGgagtgctatgcaaccc                                 | XhoI               |
| Q656          | TTTTGAATTCttggtcagatcctcgacgag                             | EcoRI              |
| Q657          | TTTTGAATTCcgtgttgctgtcgaatgg                               | EcoRI              |
| Q658          | TTTTCTCGAGgtcgatacgggccgctag                               | XhoI               |
| Q659          | TTTTCTCGAGgaattcgacgaacagcagg                              | XhoI               |
| Q660          | TTTTCTAGAgccgatgttctgtgtag                                 | XbaI               |
| Q729          | TTTTCATATGaccgctaaaggcaccatcctcgtc                         | NdeI               |
| Q728          | TTTTGAATTCtatacaaacggcggggttcc                             | EcoRI              |
| 6030          | TTTTGAATTCcgtccgactcagtgat                                 | EcoRI              |
| 6031          | TTTTCTCGAGgagatcgacggccgagtag                              | XhoI               |
| 6032          | TTTTCTCGAGaacacggtcagcctgat                                | XhoI               |
| 6033          | TTTTCTAGAtcaaccacaacatcgagacg                              | XbaI               |
| Nsco_0182     | gcatgcgatatcgagctctcccgtgcacgtgctgatcgtc                   | Gibson             |
| Nsco_0183     | cgatgctccatcagcgtCTAaggtggcgacatgaaaa                      | Gibson             |
| Nsco_0184     | ttttcatgctccaccctTAGacgctgatggaagcatcg                     | Gibson             |
| Nsco_0185     | cggataacaattgtggaattcccgcatcagctcgactgg                    | Gibson             |

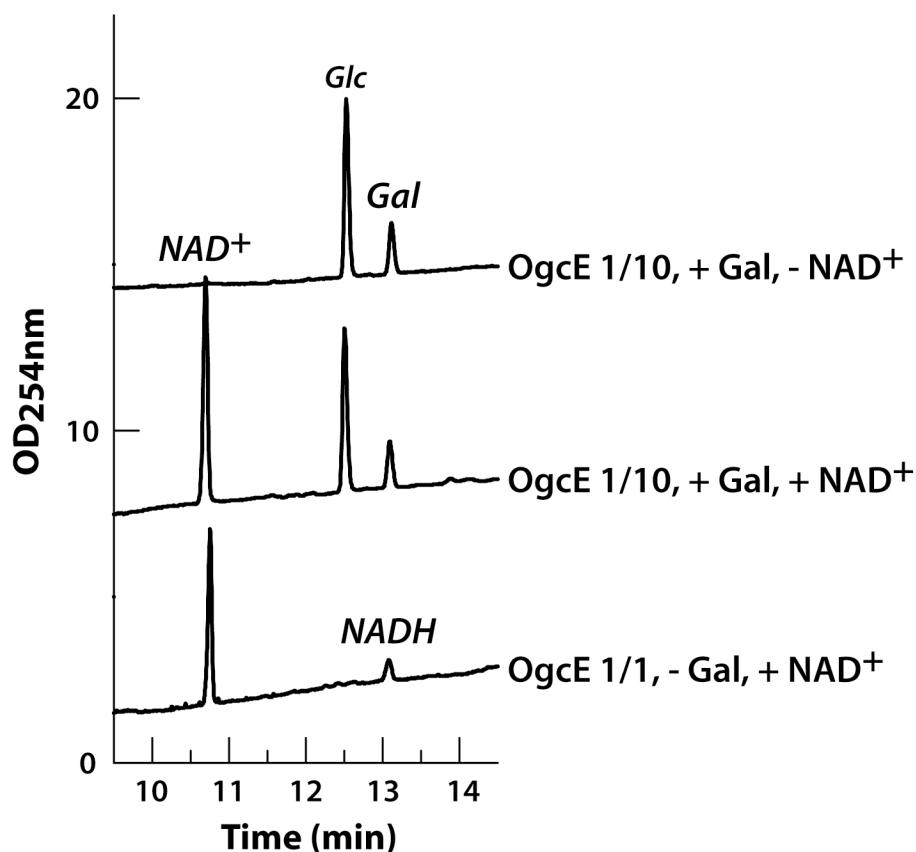

**Fig. S1.** Capillary electrophoresis electropherograms showing that OgceE does not need any exogenous cofactor for full activity and showing the release of enzyme-bound cofactor (seen as NADH). The reactions were of the same composition as on (Fig. 5) except that the enzyme concentration and the presence of cofactor or of substrate varied as indicated on the figure. The enzyme dilution 1/1 is the same dilution as in Figure 5. The reactions were incubated for 4 h at 37°C. Data shown for 1 reaction per condition optimized for enzyme to substrate ratio and for reaction time after initial result was observed on 4 reactions per condition.

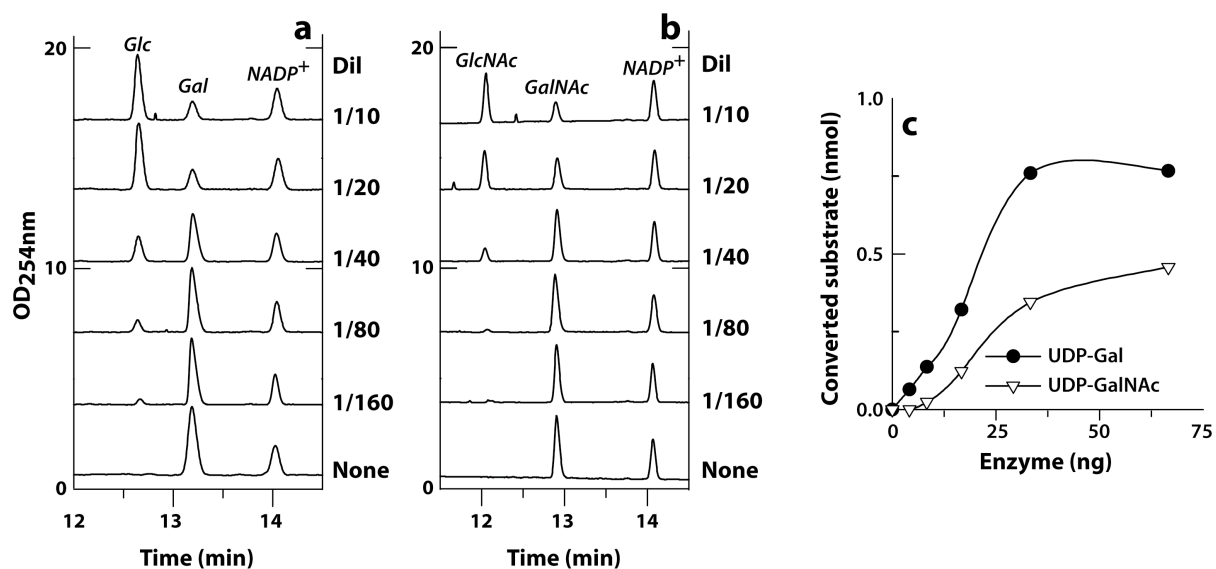

**Fig. S2.** Enhanced catalysis of UDP-Gal versus UDP-GalNAc at all enzyme dilutions tested. The reactions were incubated for 10 min. Data are representative of two independent series showing the same trend. One sample per enzyme concentration in each series.

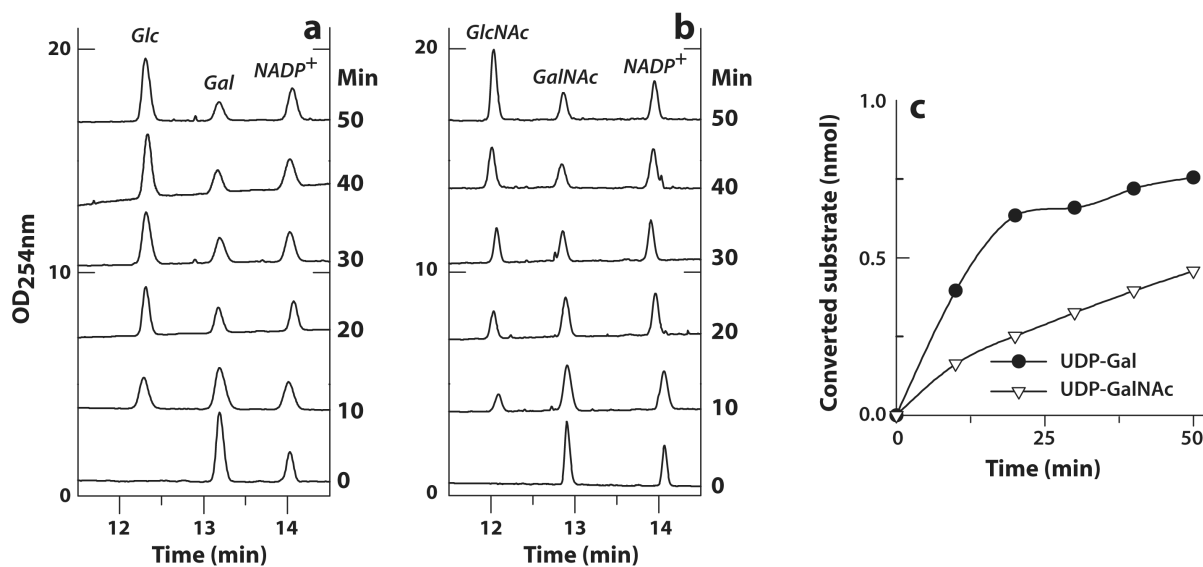

**Fig. S3.** Enhanced catalysis of UDP-Gal versus UDP-GalNAc at all time points tested. The enzyme was used in a 1/160 dilution. Data are representative of two independent series showing the same trend. One sample per time point in each series.



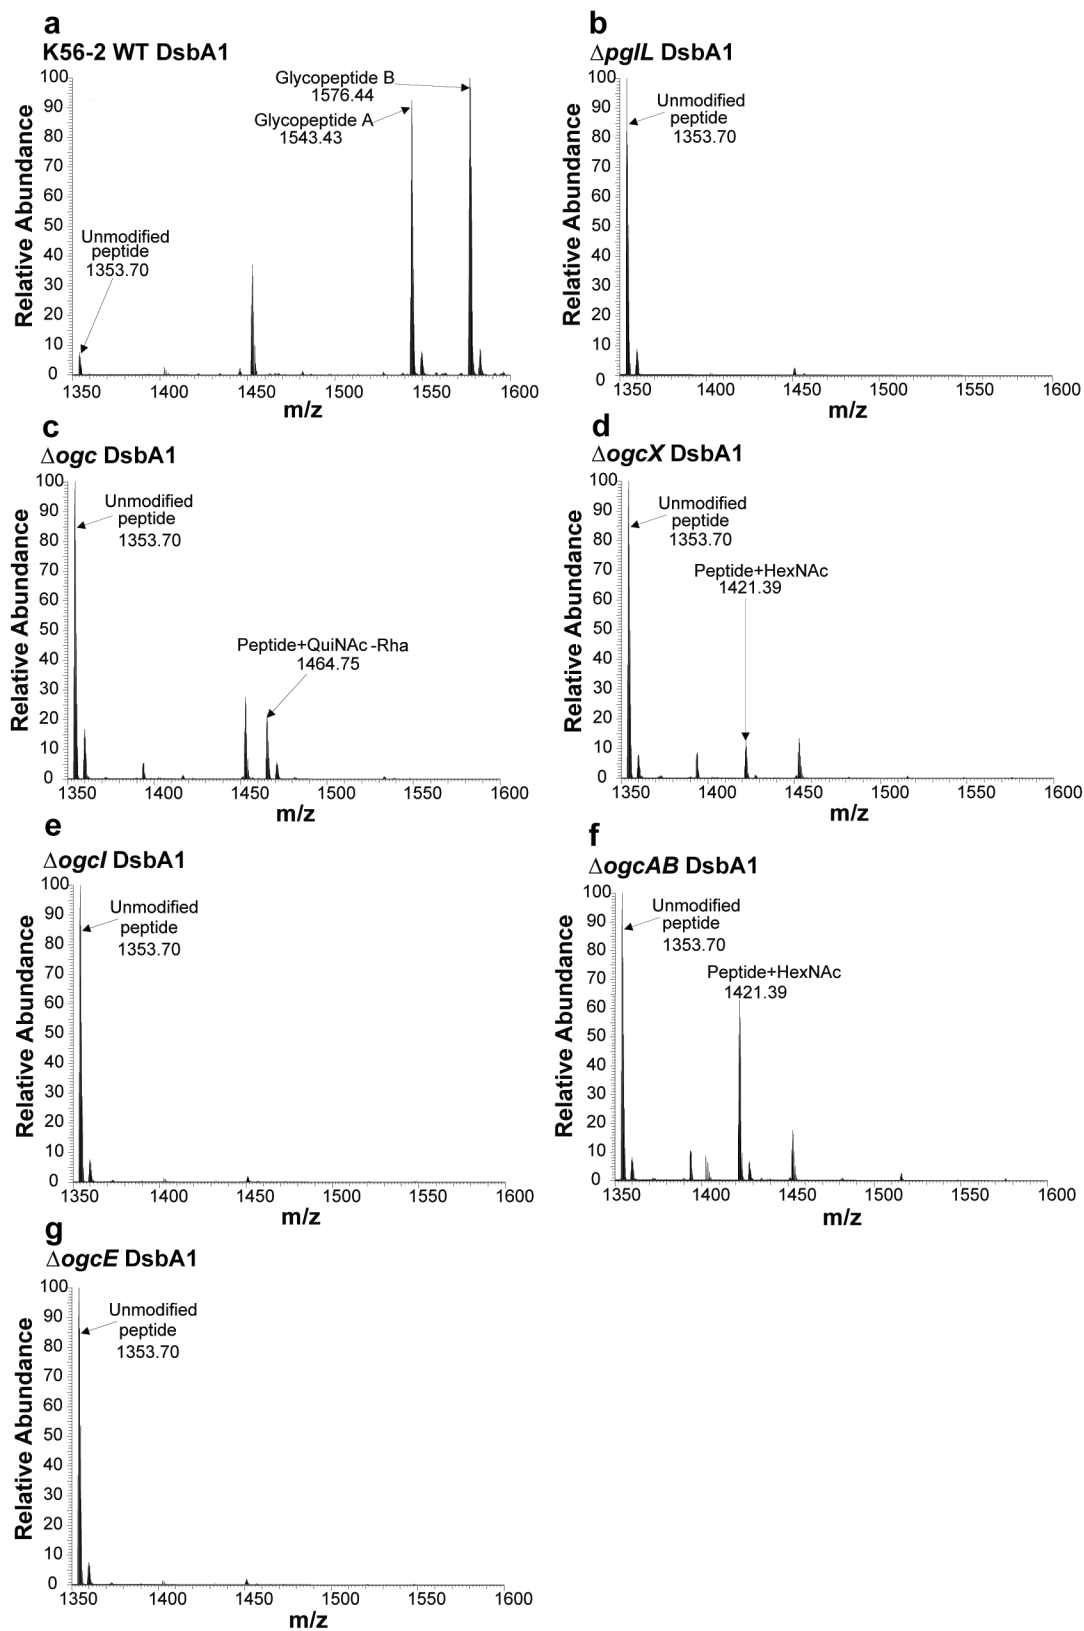

**Fig. S4.** MS spectrum of the 6xHis-tagged DsbA1 derived peptides  $^{23}$ VQTSVPADSAPAASAAAAPAGLVEGQNYTVLANPIPQQAGK $^{64}$ . Peptide forms within each strains **a** K56-2 wildtype (WT) **b**  $\Delta pgfL$  **c**  $\Delta ogcI$  **d**  $\Delta ogcX$  **e**  $\Delta ogcI$  **f**  $\Delta ogcAB$  **g**  $\Delta ogcE$

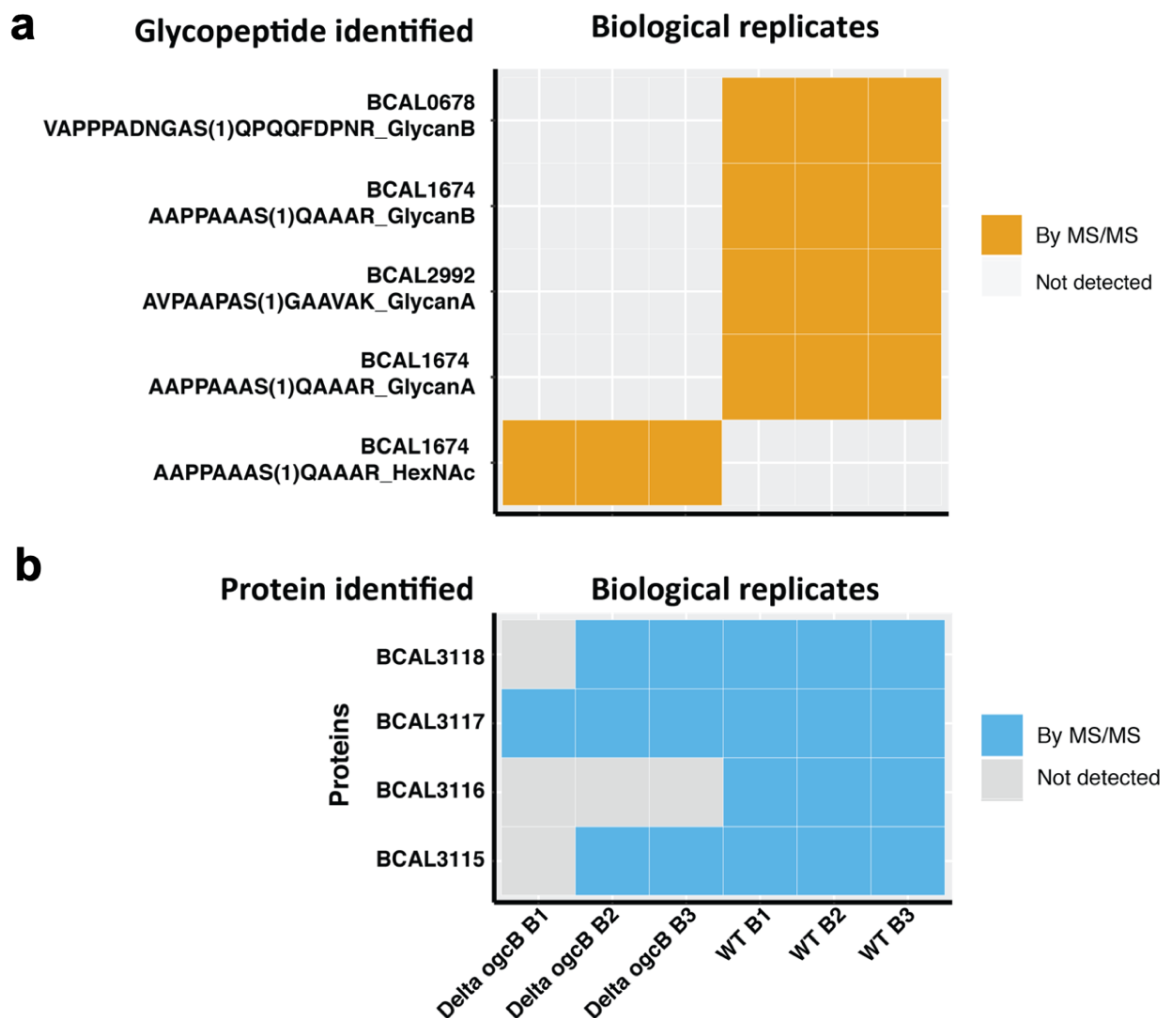

**Fig. S5.** Proteomic analysis of K56-2  $\Delta ogcB$  compared to Wild type K56-2. "By MS/MS" denotes samples in which the glycopeptide/protein was identified by MS/MS using Maxquant based analysis **a** Disruption of *ogcB* results in the loss glycan A- and B-decorated glycopeptides observed within wildtype replicates. Examples shown include the putative membrane protein BCAL0678, the putative lipoprotein BCAL2992, and the multidrug efflux system AmrA protein BCAL1674 (uniprot accessions: B4E9M8, B4EB92, and B4E8U6, respectively). Also, the AmrA protein BCAL1674 glycopeptide <sup>397</sup>AAPPAAASQAAAR<sup>409</sup> is modified with a single HexNAc, which is not observed within WT replicates. **b** Proteome analysis confirms the disruption of *ogcB* does not affect flanking genes since the proteins BCAL3115 (OgcA), BCAL3116 (OgcB), BCAL3117 (OgcE) and BCAL3118 (OgcI) encoded by the *ogc* cluster are readily detected in whole cell proteome samples, while OgcB was undetectable.

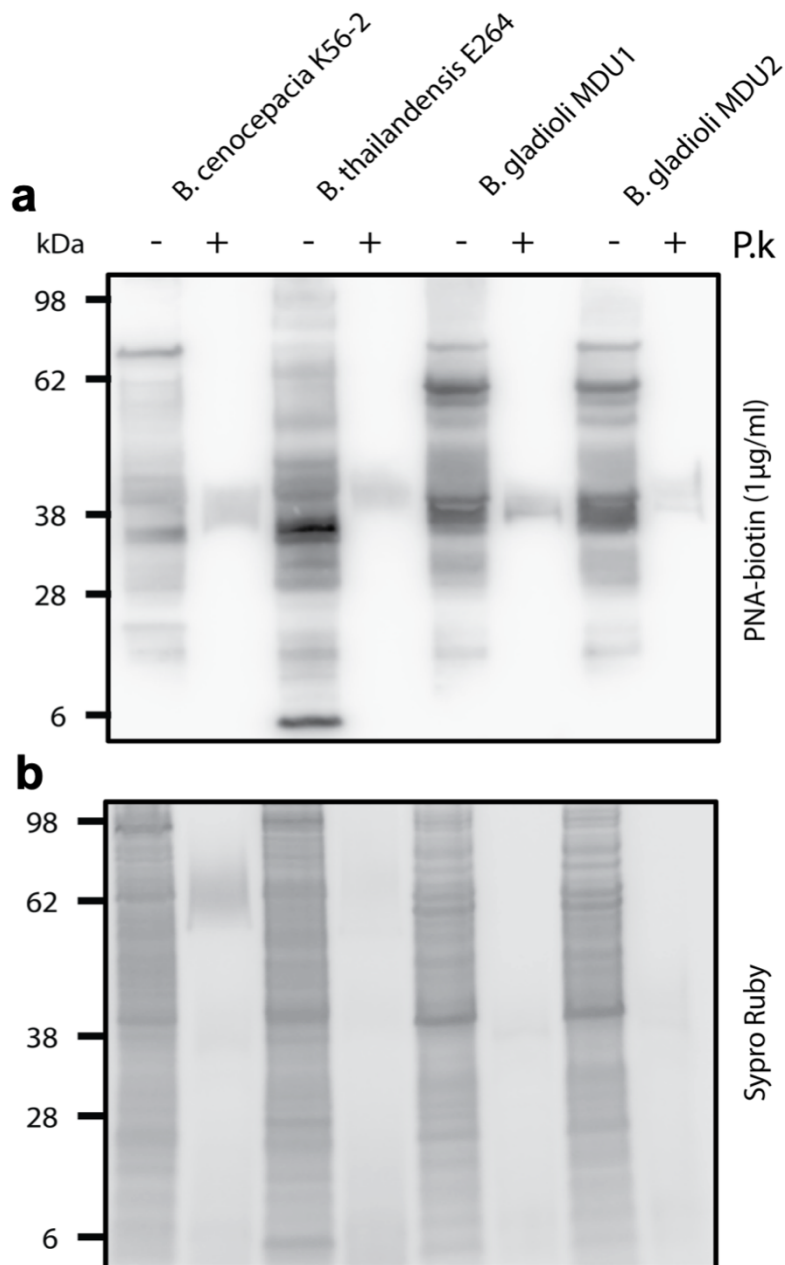

**Fig. S6.** Peanut agglutinin (PNA) lectin blotting to demonstrate the presence of Gal- $\beta$ (1-3)-GalNAc modified glycoproteins in *Burkholderia* species. **a** lectin blotting with the Gal- $\beta$ (1-3)-GalNAc specific lectin PNA conjugated to biotin and probed with fluorescent streptavidin demonstrates the presence of multiple reactive bands in *B. cenocepacia*, *B. thailandensis* and *B. gladioli*. Treatment with proteinase K (p.K.) abolishes lectin detection. **b** Protein staining of *Burkholderia* lysates demonstrates that the observed banding pattern within PNA lectin blotting is unique to that of the total proteome and confirm the removal of protein upon proteinase K treatment.

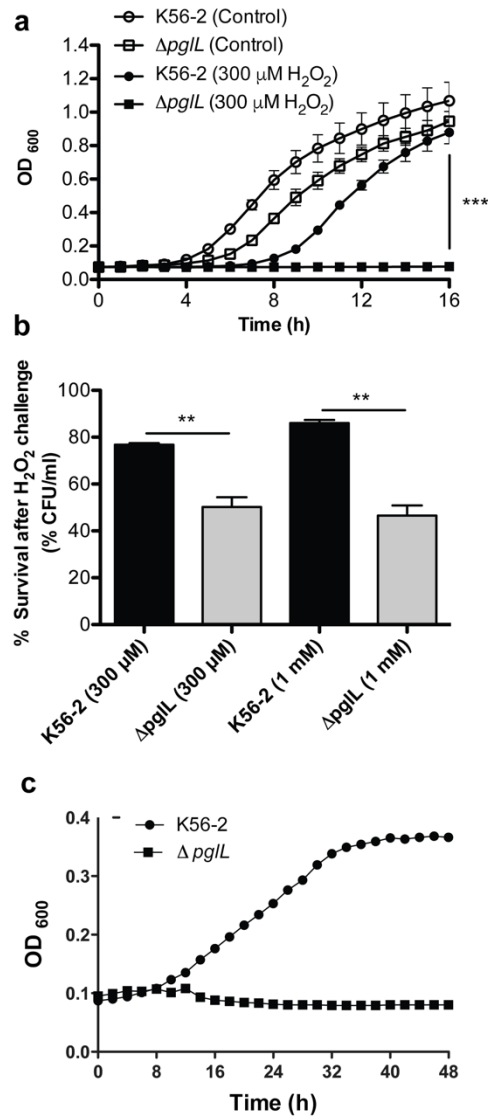

**Fig. S7. a** *ΔpglL* mutant bacteria are more sensitive to oxidative stress. Sensitivity of K56-2 and *ΔpglL* to 300 μg/ml H<sub>2</sub>O<sub>2</sub> as determined turbidimetrically using a Bioscreen C. **b** sensitivity to oxidation determined by challenging either low or high bacterial inoculum by 300 μg/ml and 1 mM of H<sub>2</sub>O<sub>2</sub>, respectively in LB for 1 h at 37°C. *n* = 6 from 3 independent experiments each done in duplicate. **c** *ΔpglL* mutant bacteria are more sensitive to osmotic stress. Growth curve depending on OD<sub>600</sub> of K56-2 and *ΔpglL* in M9 minimal media in the presence of 4% NaCl.

**Supplementary Data S1. Identified *Burkholderia thailandensis* E264 Glycopeptides.** Eight unique glycopeptides were observed within whole cell proteome samples of *B. thailandensis* E264. For assigned glycopeptides the gene, protein name, uniprot accession (mapped to *B. thailandensis* E264), observed m/z, charge state, MH<sup>+</sup> mass, peptide mass, glycan, peptide sequence, MASCOT ion score and containing annotated CID and HCD data are provided.

**Supplementary Data S2. Identified *Burkholderia gladioli* MDU1 (AUSMDU00013928) Glycopeptides.** Twenty-nine unique glycopeptides were observed within whole cell proteome samples of *B. gladioli* MDU1. For assigned glycopeptides the gene, protein name, uniprot accession (mapped to *B. gladioli* BSR3), observed m/z, charge state, MH<sup>+</sup> mass, peptide mass, glycan, peptide sequence, MASCOT ion score and containing annotated CID and HCD data are provided.

**Supplementary Data S3. Identified *Burkholderia gladioli* MDU2 (AUSMDU00013929) Glycopeptides.** Twenty-four unique glycopeptides were observed within whole cell proteome samples of *B. gladioli* MDU2. For assigned glycopeptides the gene, protein name, uniprot accession (mapped to *B. gladioli* BSR3), observed m/z, charge state, MH<sup>+</sup> mass, peptide mass, glycan, peptide sequence, MASCOT ion score and containing annotated CID and HCD data are provided.

**Supplementary Data S4. Identified *Burkholderia pseudomallei* Glycopeptides observed across strains.** Ten unique glycopeptides were observed within whole cell proteome samples of *B. pseudomallei* strains. For assigned glycopeptides the *B. pseudomallei* strain, gene, protein name, uniprot accession (mapped to *B. pseudomallei* K96243), observed m/z, charge state, MH<sup>+</sup> mass, peptide mass, glycan, peptide sequence, MASCOT ion score and containing annotated CID and HCD data are provided.

**Supplementary Data S5. Phenotypic array analysis.** Excel file with the raw Area under the Curve (AUC) values used for the calculations of the relative growth defects of *pgII* in the various carbon sources.

**Supplementary Data S6. qRT-PCR data.** Excel file with the qRT-PCR data used for the calculation of the normalized fold expression of target transcripts in *Galleria mellonella*.
